# Supplementary material for: Distinct clonal evolution of B-cells in HIV controllers with neutralizing antibody breadth
Source: eLife. 2021 Apr 12;10:e62648. doi: 10.7554/eLife.62648 (PMC8041465; doi:10.7554/eLife.62648)
Supplement: Supplementary file 2. [file elife-62648-supp2.xlsx]

## Sheet: Annotated BCRs
			Heavy chain							Light chain
Sequence pair ID	Donor identifier	Neutralization	Heavy chain sequence	IGHV	IGHD	IGHJ	CDRH3	CDRH3 aa length	% SHM	Light chain sequence	IGLV/IGKV	IGLJ	CDRL3	CDRL3 aa length	%SHM
c28666	149812	NN	ATGGAGTTTGGGCTGAGCTGGGTTTTCCTCGTTGCTCTTTTAAGAGGTGTCCAGTGTCAGGTGCAGCTGGTGGAGTCTGGGGGAGGCGTGGTCCAGCCTGGGAGGTCCCTGAGACTCTCCTGTGCAGCCTCTGGATTCACCTTCAGTAAATATGCTATGCACTGGGTCCGCCAGGCTCCAGGCAAGGGGCTGGAGTGGGTGGCAGTTATATCATATGATGGAAGTAAGAAATACTACGCAGACTCCGTGAAGGGCCGATTCACCATCTCCAGAGACAATTCCAAGAACATGCTGTATCTGCAAATGAACAGCCTGAGAGCTGAGGACACGACTGTGTTTTACTGTGCGAGAGATCTGTGGGATAGCAGTGGCTGGAGGAATTACTACTACTACTACGTT…	IGHV3-30*04	IGHD6-19*01	IGHJ6*02	ARDLWDSSGWRNYYYYYVMDV	21	1.95531	ATGGAAACCCCAGCGCAGCTTCTCTTCCTCCTGCTACTCTGGCTCCCAGATACCACCGGAGAAATTGTGTTGACGCAGTCTCCAGGCACCCTGTCTTTGTCTCCAGGGGAAAGAGCCACCCTCTCCTGCAGGGCCAGTCAGAGTGTTAGCAGCAGCTACTTAGCCTGGTACCAGCAGAAACCTGGCCAGGCTCCCAGGCTCCTCATCTTTGGTGCATCCAGCAGGGCCAGTGGCATCCCAGACAGGTTCAGTGGCAGTGGGTCTGGGACAGACTTCACTCTCACCATCAGCAGACTGGAGCCTGAAGATTTTGCAGTATATTACTGTCAGCAGTGTGGTAGCTCACCTCTTTTCGGCGGAGGGACCAAGGTGGAGATCAAACG	KV3-20	KJ4	QQCGSSPL	8	1.25
c28723	149812	NN	ATGGAGTTTGGGCTGAGCTGGGTTTTCCTCGTTGCTCTTTTAAGAGGTGTCCAGTGTCAGGTGCAGCTGGTGGAGTCTGGGGGAGGCGTGGTCCAGCCTGGGAGGTCCCTGAGACTCTCCTGTGCAGCCTCTGGATTCACCTTCAGTAAATATGCTATGCACTGGGTCCGCCAGGCTCCAGGCAAGGGGCTGGAGTGGGTGGCAGTTATATCATATGATGGAAGTAAGAAATACTACGCAGACTCCGTGAAGGGCCGATTCACCATCTCCAGAGACAATTCCAAGAACATGCTGTATCTGCAAATGAACAGCCTGAGAGCTGAGGACACGACTGTGTTTTACTGTGCGAGAGATCTGTGGGATAGCAGTGGCTGGAGGAATTACTACTACTACTACGTT…	IGHV3-30*04	IGHD6-19*01	IGHJ6*02	ARDLWDSSGWRNYYYYYVMDV	21	1.95531	ATGGAAACCCCAGCGCAGCTTCTCTTCCTCCTGCTACTCTGGCTCCCAGATACCACCGGAGAAATTGTGTTGACGCAGTCTCCAGGCACCCTGTCTTTGTCTCCAGGGGAAAGAGCCACCCTCTCCTGCAGGGCCAGTCAGAGTGTTAGCAGCAGCTACTTAGCCTGGTACCAGCAGAAACCTGGCCAGGCTCCCAGGCTCCTCATCTTTGGTGCATCCAGCAGGGCCAGTGGCATCCCAGACAGGTTCAGTGGCAGTGGGTCTGGGACAGACTTCACTCTCACCATCAGCAGACTGGAGCCTGAAGATTTTGCAGTATATTACTGTCAGCAGTGTGGTAGCTCACCTCTTTTCGGCGGAGGGACCAAGGTGGAGATCAAACG	KV3-20	KJ4	QQCGSSPL	8	1.25
c28897	149812	NN	ATGGAACTGGGGCTCCGCTGGGTTTTCCTTGTTGCTATTTTAGAAGGTGTCCAGTGTGAGGTGCAACTGGTGGAGTCTGGGGGAGGCCTGGTCAAGCCTGGGGGGTCCCTGAGACTCTCCTGTGCAGCCTCTGGATTCACCTTCAGTAGTTATAACATGAATTGGGTCCGCCAGGCTCCAGGGAAGGGGCTGGAGTGGGTCTCATCCATTACTCGTAGTAGTAGTTACATATACTACGCAGACTCAGTGAGGGGCCGATTCACCATCTCCAGAGACAACGCCAACAACTCACTGTATCTGCAAATGAACAGCCTGAGAGCCGAGGACACGGCTGTCTATTACTGTGCGAGGGACTATGATAGCAGTGATTATCCGAATTGGCTCGACCCCTGGGGCCAG…	IGHV3-21*02	IGHD3-22*01	IGHJ5*02	ARDYDSSDYPNWLDP	15	2.67062	ATGGCCTGGGCTCTGCTATTCCTCACCCTCCTCACTCAGGGCACAGGGTCCTGGGCCCAGTCTGCCCTGACTCAGCCTGCCTCCGTGTCTGGGTCTCCTGGACAGTCGATCACCATCTCCTGCACTGGAATTAGCAATGACGTTGGTGATTATCATTATGTCTCCTGGTACCAGCAACACCCAGGCAAAGCCCCCAAACTCATGATTTATGATGTCAGTAATCGGCCCTCAGGGGTTTCTAGTCGCTTCTCTGGCTCCAAGTCTGGCAACACGGCCTCCCTGACCATCTCTGGGCTCCAGGCTGAGGACGAGGCTGATTATTACTGCAACTCATACACAAGCGACAGCACTCTTTATGTCTTCGGAACTGGGACCAAGGTCACCGTCCTAGG	LV2-14	LJ1	NSYTSDSTLYV	11	4.2042
c28716	149812	NN	ATGAAACACCTGTGGTTCTTCCTCCTGCTGGTGGCAGCTCCCAGATGGGTCCTGTCCCAGGTGCAGCTGCAGGAGTCGGGCCCAGGACTGGTGAAGCCTTCACAGACCCTGTCCCTCACCTGCACTGTCTCTGGTGGCTCCATCAACAGTGGTGGTTTCTACTGGAGCTGGATCCGCCAGCACCCAGGGGAGGGCCTGGAGTGGATTGGGTACATGTATGACAGTGGGAGCACCTACTACAACCCGTCCCTCAAGAGTCGAGTTACCATATCAGTAGACACGTCTAAGAACCAGTTCTCTCTGAAGCTGACCTCTGTGACTGCCGCGGACACGGCCGTCTATTACTGTGCGAGAGATCAAGAAGTGGCAGCAGCTGCTACGGGTGCTTTTGATATCTGG…	IGHV4-31*03	IGHD6-13*01	IGHJ3*02	ARDQEVAAAATGAFDI	16	2.31884	ATGGAAACCCCAGCGCAGCTTCTCTTCCTCCTGCTACTCTGGCTCCCAGGTACCACCGGCAAAATTGTGTTGACGCAGTCTCCAGGCACCCTGTCTTTGTCTCCAGGGGAAAGAGCCACCCTCTCCTGCAGGGCCAGTCAGAGTCTTAGCAGCAGCTACTTAGCCTGGTACCACCAGAAACCTGGCCAGGCTCCCAGGCTCCTCATCTATGCTGCATCTAGCAGGGCCACTGGCACCCCAGACAGGTTCAGTGGCAGTGGGTCTGGGACAGACTTCACTCTCACCATCAGCCGACTGGAGCCTGAAGATTTTGCAGTGTATTACTGTCAGCAGTATGGTAGCTCCCTTCTCACTTTCGGCGGAGGGACCAAGGTGGAGATCAAACG	KV3-20	KJ4	QQYGSSLLT	9	2.47678
c29239	149812	NN	ATGGACACACTTTGCTCCACGCTCCTGCTGCTGACCATCCCTTCATGGGTCTTGTCCCAGATCACCTTGAAGGAGTCTGGTCCTACGCTGGTGAAACCCACACAGACCCTCACGCTGACCTGCACCTTCTCTGGGTTTTCACTCAGCACTATTGAAGTGGGTGTGGGCTGGTTCCGTCAGCCCCCAGGAAAGGCCCTGGAGTGGCTTGCACTCATTTTTTGGGATGATGATAAGCGCTACAGGCCATCTCTGAAGAGCAGACTCACCATCACCAAGGACACCTCCAAAAACCAGGTGGTCCTTACAATGACCAACATGGACCCTGTGGACACAGCCACATATTACTGTGCACACAGCAGCTCCCCCTACTATGATAGTAGTGGTTTCCACCCCTGGGGC…	IGHV2-5*02	IGHD3-22*01	IGHJ5*02	AHSSSPYYDSSGFHP	15	2.37389	ATGGACATGAGGGTCCCCGCTCAGCTCCTGGGGCTCCTGCTACTCTGGCTCCGAGGAGCCAGAAGTGACATCCAGATGACCCAATCTCCATCCTCCCTGTCTGCGTCTGTAGGAGACAGGGTCACCATCACTTGCCGGACAAGTCAGAGCATTAGCAGATATTTAAATTGGTATCAACAGAAATCAGGGAAAGCCCCTAAACTCCTGATCTATGCTGCATCCAGTTTGCAAAGTGGGGTCCCATCAAGGTTCAGTGGCAGTGGATCTGGGACACATTTCACTCTCTCCATCAGCAGTCTGCAACCTGAAGATTTTGCAATTTACTACTGTCAACAAAGTTACAGTACCCCAACCACTTTCGGCGGGGGGACCACGGTGGAGATCGAACG	KV1-39	KJ4	QQSYSTPTT	9	4.44444
c28771	149812	NN	ATGGAGTTTGGGCTGAGCTGGGTTTTCCTCGTTGCTCTTTTAAGAGGTGTCCAGTGTCAGGTGCAGCTGGTGGAGTCTGGGGGAGGCGTGGTCCAGCCTGGGAGGTCCCTGAGACTCTCCTGTGCAGCGTCTGGATTCACCTTCAGTGACTTTGGCATGCACTGGGTCCGCCAGGCTCCAGGCAAGGGGCTGGAGTGGGTGGCAGTTATATGGTATGATGGAAGTAATAAATACTATGCAGACTCCGTGAAGGGCCGATTCACCATCTCCAGAGACAATTCCAAGAACACGCTGTATCTGCAAATGAACAGCCTGAGAGCCGAGGACACGGCTGTCTATTACTGTGCAAGAGATCATTGGAACGACTCCCCCTTTGACTCCTGGGGCCAGGGAACCCTG…	IGHV3-33*01	IGHD1-1*01	IGHJ4*02	ARDHWNDSPFDS	12	1.76991	ATGGAAGCCCCAGCTCAGCTTCTCTTCCTCCTGCTACTCTGGCTCCCAGATACCACCGGAGAAATTGTGTTGACACAGTCTCCAGCCACCCTGTCTTTGTCTCCAGGGGAAAGAGCCACCCTCTCCTGCAGGGCCAGTCAGAGTGTTAGCAGCTACTTAGCCTGGTTCCAACAGAAACCTGGCCAGGCTCCCAGGCTCCTCATCTATGATGCATCCATCAGGGCCACTGGCATCCCAGCCAGGTTCAGTGGCAGTGGGTCTGGGACAGACTTCACTCTCACCATCAGCAGCCTAGAGCCTGAAGATTTTGCAGTTTATTACTGTCAGCAGCGTAGCAACTGGCCTAAGACGTTCGGCCAAGGGACCAAGGTGGAAATCAAACG	KV3-11	KJ1	QQRSNWPKT	9	0.626959
c29074	149812	NN	ATGGAGTTTGGGCTGAGCTGGGTTTTCCTCGTTGCTCTTTTAAGAGGTGTCCAGTGTCAGGTGCAGCTGGTGGAGTCTGGGGGAGGCGTGGTCCAGCCTGGGAGGTCCCTGAGACTCTCCTGTGCAGCGTCTGGATTCACCTTCAGTGACTTTGGCATGCACTGGGTCCGCCAGGCTCCAGGCAAGGGGCTGGAGTGGGTGGCAGTTATATGGTATGATGGAAGTAATAAATACTATGCAGACTCCGTGAAGGGCCGATTCACCATCTCCAGAGACAATTCCAAGAACACGCTGTATCTGCAAATGAACAGCCTGAGAGCCGAGGACACGGCTGTCTATTACTGTGCAAGAGATCATTGGAACGACTCCCCCTTTGACTCCTGGGGCCAGGGAACCCTG…	IGHV3-33*01	IGHD1-1*01	IGHJ4*02	ARDHWNDSPFDS	12	1.76991	ATGGAAGCCCCAGCTCAGCTTCTCTTCCTCCTGCTACTCTGGCTCCCAGATACCACCGGAGAAATTGTGTTGACACAGTCTCCAGCCACCCTGTCTTTGTCTCCAGGGGAAAGAGCCACCCTCTCCTGCAGGGCCAGTCAGAGTGTTAGCAGCTACTTAGCCTGGTTCCAACAGAAACCTGGCCAGGCTCCCAGGCTCCTCATCTATGATGCATCCATCAGGGCCACTGGCATCCCAGCCAGGTTCAGTGGCAGTGGGTCTGGGACAGACTTCACTCTCACCATCAGCAGCCTAGAGCCTGAAGATTTTGCAGTTTATTACTGTCAGCAGCGTAGCAACTGGCCTAAGACGTTCGGCCAAGGGACCAAGGTGGAAATCAAACG	KV3-11	KJ1	QQRSNWPKT	9	0.626959
c28808	149812	NN	ATGGAGTTTGGGCTGAGCTGGGTTTTCCTCGTTGCTCTTTTAAGAGGTGTCCAGTGTCAGGTGCAGCTGGTGGAGTCTGGGGGAGGCGTGGTCCAGCCTGGGAGGTCCCTGAGACTCTCCTGTGCAGCGTCTGGATTCACCTTCAGTGACTTTGGCATGCACTGGGTCCGCCAGGCTCCAGGCAAGGGGCTGGAGTGGGTGGCAGTTATATGGTATGATGGAAGTAATAAATACTATGCAGACTCCGTGAAGGGCCGATTCACCATCTCCAGAGACAATTCCAAGAACACGCTGTATCTGCAAATGAACAGCCTGAGAGCCGAGGACACGGCTGTCTATTACTGTGCAAGAGATCATTGGAACGACTCCCCCTTTGACTCCTGGGGCCAGGGAACCCTG…	IGHV3-33*01	IGHD1-1*01	IGHJ4*02	ARDHWNDSPFDS	12	1.76991	ATGGAAGCCCCAGCTCAGCTTCTCTTCCTCCTGCTACTCTGGCTCCCAGATACCACCGGAGAAATTGTGTTGACACAGTCTCCAGCCACCCTGTCTTTGTCTCCAGGGGAAAGAGCCACCCTCTCCTGCAGGGCCAGTCAGAGTGTTAGCAGCTACTTAGCCTGGTTCCAACAGAAACCTGGCCAGGCTCCCAGGCTCCTCATCTATGATGCATCCATCAGGGCCACTGGCATCCCAGCCAGGTTCAGTGGCAGTGGGTCTGGGACAGACTTCACTCTCACCATCAGCAGCCTAGAGCCTGAAGATTTTGCAGTTTATTACTGTCAGCAGCGTAGCAACTGGCCTAAGACGTTCGGCCAAGGGACCAAGGTGGAAATCAAACG	KV3-11	KJ1	QQRSNWPKT	9	0.626959
c28730	149812	NN	ATGGAGTTTGGGCTGAGCTGGGTTTTCCTCGTTGCTCTTTTAAGAGGTGTCCAGTGTCAGGTGCAGCTGGTGGAGTCTGGGGGAGGCGTGGTCCAGCCTGGGAGGTCCCTGAGACTCTCCTGTGCAGCGTCTGGATTCACCTTCAGTGACTTTGGCATGCACTGGGTCCGCCAGGCTCCAGGCAAGGGGCTGGAGTGGGTGGCAGTTATATGGTATGATGGAAGTAATAAATACTATGCAGACTCCGTGAAGGGCCGATTCACCATCTCCAGAGACAATTCCAAGAACACGCTGTATCTGCAAATGAACAGCCTGAGAGCCGAGGACACGGCTGTCTATTACTGTGCAAGAGATCATTGGAACGACTCCCCCTTTGACTCCTGGGGCCAGGGAACCCTG…	IGHV3-33*01	IGHD1-1*01	IGHJ4*02	ARDHWNDSPFDS	12	1.76991	ATGGAAGCCCCAGCTCAGCTTCTCTTCCTCCTGCTACTCTGGCTCCCAGATACCACCGGAGAAATTGTGTTGACACAGTCTCCAGCCACCCTGTCTTTGTCTCCAGGGGAAAGAGCCACCCTCTCCTGCAGGGCCAGTCAGAGTGTTAGCAGCTACTTAGCCTGGTTCCAACAGAAACCTGGCCAGGCTCCCAGGCTCCTCATCTATGATGCATCCATCAGGGCCACTGGCATCCCAGCCAGGTTCAGTGGCAGTGGGTCTGGGACAGACTTCACTCTCACCATCAGCAGCCTAGAGCCTGAAGATTTTGCAGTTTATTACTGTCAGCAGCGTAGCAACTGGCCTAAGACGTTCGGCCAAGGGACCAAGGTGGAAATCAAACG	KV3-11	KJ1	QQRSNWPKT	9	0.626959
c28877	149812	NN	ATGGAGTTTGGGCTGAGCTGGGTTTTCCTCGTTGCTCTTTTAAGAGGTGTCCAGTGTCAGGTGCAGCTGGTGGAGTCTGGGGGAGGCGTGGTCCAGCCTGGGAGGTCCCTGAGACTCTCCTGTGCAGCGTCTGGATTCACCTTCAGTGACTTTGGCATGCACTGGGTCCGCCAGGCTCCAGGCAAGGGGCTGGAGTGGGTGGCAGTTATATGGTATGATGGAAGTAATAAATACTATGCAGACTCCGTGAAGGGCCGATTCACCATCTCCAGAGACAATTCCAAGAACACGCTGTATCTGCAAATGAACAGCCTGAGAGCCGAGGACACGGCTGTCTATTACTGTGCAAGAGATCATTGGAACGACTCCCCCTTTGACTCCTGGGGCCAGGGAACCCTG…	IGHV3-33*01	IGHD1-1*01	IGHJ4*02	ARDHWNDSPFDS	12	1.76991	ATGGAAGCCCCAGCTCAGCTTCTCTTCCTCCTGCTACTCTGGCTCCCAGATACCACCGGAGAAATTGTGTTGACACAGTCTCCAGCCACCCTGTCTTTGTCTCCAGGGGAAAGAGCCACCCTCTCCTGCAGGGCCAGTCAGAGTGTTAGCAGCTACTTAGCCTGGTTCCAACAGAAACCTGGCCAGGCTCCCAGGCTCCTCATCTATGATGCATCCATCAGGGCCACTGGCATCCCAGCCAGGTTCAGTGGCAGTGGGTCTGGGACAGACTTCACTCTCACCATCAGCAGCCTAGAGCCTGAAGATTTTGCAGTTTATTACTGTCAGCAGCGTAGCAACTGGCCTAAGACGTTCGGCCAAGGGACCAAGGTGGAAATCAAACG	KV3-11	KJ1	QQRSNWPKT	9	0.626959
c29099	149812	NN	ATGGAGTTTGGGCTGAGCTGGGTTTTCCTCGTTGCTCTTTTAAGAGGTGTCCAGTGTCAGGTGCAGCTGGTGGAGTCTGGGGGAGGCGTGGTCCAGCCTGGGAGGTCCCTGAGACTCTCCTGTGCAGCGTCTGGATTCACCTTCAGTGACTTTGGCATGCACTGGGTCCGCCAGGCTCCAGGCAAGGGGCTGGAGTGGGTGGCAGTTATATGGTATGATGGAAGTAATAAATACTATGCAGACTCCGTGAAGGGCCGATTCACCATCTCCAGAGACAATTCCAAGAACACGCTGTATCTGCAAATGAACAGCCTGAGAGCCGAGGACACGGCTGTCTATTACTGTGCAAGAGATCATTGGAACGACTCCCCCTTTGACTCCTGGGGCCAGGGAACCCTG…	IGHV3-33*01	IGHD1-1*01	IGHJ4*02	ARDHWNDSPFDS	12	1.76991	ATGGAAGCCCCAGCTCAGCTTCTCTTCCTCCTGCTACTCTGGCTCCCAGATACCACCGGAGAAATTGTGTTGACACAGTCTCCAGCCACCCTGTCTTTGTCTCCAGGGGAAAGAGCCACCCTCTCCTGCAGGGCCAGTCAGAGTGTTAGCAGCTACTTAGCCTGGTTCCAACAGAAACCTGGCCAGGCTCCCAGGCTCCTCATCTATGATGCATCCATCAGGGCCACTGGCATCCCAGCCAGGTTCAGTGGCAGTGGGTCTGGGACAGACTTCACTCTCACCATCAGCAGCCTAGAGCCTGAAGATTTTGCAGTTTATTACTGTCAGCAGCGTAGCAACTGGCCTAAGACGTTCGGCCAAGGGACCAAGGTGGAAATCAAACG	KV3-11	KJ1	QQRSNWPKT	9	0.626959
c28932	149812	NN	ATGGAGTTTGGGCTGAGCTGGGTTTTCCTCGTTGCTCTTTTAAGAGGTGTCCAGTGTCAGGTGCAGCTGGTGGAGTCTGGGGGAGGCGTGGTCCAGCCTGGGAGGTCCCTGAGACTCTCCTGTGCAGCGTCTGGATTCACCTTCAGTGACTTTGGCATGCACTGGGTCCGCCAGGCTCCAGGCAAGGGGCTGGAGTGGGTGGCAGTTATATGGTATGATGGAAGTAATAAATACTATGCAGACTCCGTGAAGGGCCGATTCACCATCTCCAGAGACAATTCCAAGAACACGCTGTATCTGCAAATGAACAGCCTGAGAGCCGAGGACACGGCTGTCTATTACTGTGCAAGAGATCATTGGAACGACTCCCCCTTTGACTCCTGGGGCCAGGGAACCCTG…	IGHV3-33*01	IGHD1-1*01	IGHJ4*02	ARDHWNDSPFDS	12	1.76991	ATGGAAGCCCCAGCTCAGCTTCTCTTCCTCCTGCTACTCTGGCTCCCAGATACCACCGGAGAAATTGTGTTGACACAGTCTCCAGCCACCCTGTCTTTGTCTCCAGGGGAAAGAGCCACCCTCTCCTGCAGGGCCAGTCAGAGTGTTAGCAGCTACTTAGCCTGGTTCCAACAGAAACCTGGCCAGGCTCCCAGGCTCCTCATCTATGATGCATCCATCAGGGCCACTGGCATCCCAGCCAGGTTCAGTGGCAGTGGGTCTGGGACAGACTTCACTCTCACCATCAGCAGCCTAGAGCCTGAAGATTTTGCAGTTTATTACTGTCAGCAGCGTAGCAACTGGCCTAAGACGTTCGGCCAAGGGACCAAGGTGGAAATCAAACG	KV3-11	KJ1	QQRSNWPKT	9	0.626959
c29023	149812	NN	ATGGAGTTTGGGCTGAGCTGGGTTTTCCTCGTTGCTCTTTTAAGAGGTGTCCAGTGTCAGGTGCAGCTGGTGGAGTCTGGGGGAGGCGTGGTCCAGCCTGGGAGGTCCCTGAGACTCTCCTGTGCAGCGTCTGGATTCACCTTCAGTGACTTTGGCATGCACTGGGTCCGCCAGGCTCCAGGCAAGGGGCTGGAGTGGGTGGCAGTTATATGGTATGATGGAAGTAATAAATACTATGCAGACTCCGTGAAGGGCCGATTCACCATCTCCAGAGACAATTCCAAGAACACGCTGTATCTGCAAATGAACAGCCTGAGAGCCGAGGACACGGCTGTCTATTACTGTGCAAGAGATCATTGGAACGACTCCCCCTTTGACTCCTGGGGCCAGGGAACCCTG…	IGHV3-33*01	IGHD1-1*01	IGHJ4*02	ARDHWNDSPFDS	12	1.76991	ATGGAAGCCCCAGCTCAGCTTCTCTTCCTCCTGCTACTCTGGCTCCCAGATACCACCGGAGAAATTGTGTTGACACAGTCTCCAGCCACCCTGTCTTTGTCTCCAGGGGAAAGAGCCACCCTCTCCTGCAGGGCCAGTCAGAGTGTTAGCAGCTACTTAGCCTGGTTCCAACAGAAACCTGGCCAGGCTCCCAGGCTCCTCATCTATGATGCATCCATCAGGGCCACTGGCATCCCAGCCAGGTTCAGTGGCAGTGGGTCTGGGACAGACTTCACTCTCACCATCAGCAGCCTAGAGCCTGAAGATTTTGCAGTTTATTACTGTCAGCAGCGTAGCAACTGGCCTAAGACGTTCGGCCAAGGGACCAAGGTGGAAATCAAACG	KV3-11	KJ1	QQRSNWPKT	9	0.626959
c28952	149812	NN	ATGGAGTTTGGGCTGAGCTGGGTTTTCCTCGTTGCTCTTTTAAGAGGTGTCCAGTGTCAGGTGCAGCTGGTGGAGTCTGGGGGAGGCGTGGTCCAGCCTGGGAGGTCCCTGAGACTCTCCTGTGCAGCGTCTGGATTCACCTTCAGTGACTTTGGCATGCACTGGGTCCGCCAGGCTCCAGGCAAGGGGCTGGAGTGGGTGGCAGTTATATGGTATGATGGAAGTAATAAATACTATGCAGACTCCGTGAAGGGCCGATTCACCATCTCCAGAGACAATTCCAAGAACACGCTGTATCTGCAAATGAACAGCCTGAGAGCCGAGGACACGGCTGTCTATTACTGTGCAAGAGATCATTGGAACGACTCCCCCTTTGACTCCTGGGGCCAGGGAACCCTG…	IGHV3-33*01	IGHD1-1*01	IGHJ4*02	ARDHWNDSPFDS	12	1.76991	ATGGAAGCCCCAGCTCAGCTTCTCTTCCTCCTGCTACTCTGGCTCCCAGATACCACCGGAGAAATTGTGTTGACACAGTCTCCAGCCACCCTGTCTTTGTCTCCAGGGGAAAGAGCCACCCTCTCCTGCAGGGCCAGTCAGAGTGTTAGCAGCTACTTAGCCTGGTTCCAACAGAAACCTGGCCAGGCTCCCAGGCTCCTCATCTATGATGCATCCATCAGGGCCACTGGCATCCCAGCCAGGTTCAGTGGCAGTGGGTCTGGGACAGACTTCACTCTCACCATCAGCAGCCTAGAGCCTGAAGATTTTGCAGTTTATTACTGTCAGCAGCGTAGCAACTGGCCTAAGACGTTCGGCCAAGGGACCAAGGTGGAAATCAAACG	KV3-11	KJ1	QQRSNWPKT	9	0.626959
c29021	149812	NN	ATGGAGTTTGGGCTGAGCTGGGTTTTCCTCGTTGCTCTTTTAAGAGGTGTCCAGTGTCAGGTGCAGCTGGTGGAGTCTGGGGGAGGCGTGGTCCAGCCTGGGAGGTCCCTGAGACTCTCCTGTGCAGCGTCTGGATTCACCTTCAGTGACTTTGGCATGCACTGGGTCCGCCAGGCTCCAGGCAAGGGGCTGGAGTGGGTGGCAGTTATATGGTATGATGGAAGTAATAAATACTATGCAGACTCCGTGAAGGGCCGATTCACCATCTCCAGAGACAATTCCAAGAACACGCTGTATCTGCAAATGAACAGCCTGAGAGCCGAGGACACGGCTGTCTATTACTGTGCAAGAGATCATTGGAACGACTCCCCCTTTGACTCCTGGGGCCAGGGAACCCTG…	IGHV3-33*01	IGHD1-1*01	IGHJ4*02	ARDHWNDSPFDS	12	1.76991	ATGGAAGCCCCAGCTCAGCTTCTCTTCCTCCTGCTACTCTGGCTCCCAGATACCACCGGAGAAATTGTGTTGACACAGTCTCCAGCCACCCTGTCTTTGTCTCCAGGGGAAAGAGCCACCCTCTCCTGCAGGGCCAGTCAGAGTGTTAGCAGCTACTTAGCCTGGTTCCAACAGAAACCTGGCCAGGCTCCCAGGCTCCTCATCTATGATGCATCCATCAGGGCCACTGGCATCCCAGCCAGGTTCAGTGGCAGTGGGTCTGGGACAGACTTCACTCTCACCATCAGCAGCCTAGAGCCTGAAGATTTTGCAGTTTATTACTGTCAGCAGCGTAGCAACTGGCCTAAGACGTTCGGCCAAGGGACCAAGGTGGAAATCAAACG	KV3-11	KJ1	QQRSNWPKT	9	0.626959
c28686	149812	NN	ATGGAGTTTGGGCTGAGCTGGGTTTTCCTCGTTGCTCTTTTAAGAGGTGTCCAGTGTCAGGTGCAGCTGGTGGAGTCTGGGGGAGGCGTGGTCCAGCCTGGGAGGTCCCTGAGACTCTCCTGTGCAGCGTCTGGATTCACCTTCAGTGACTTTGGCATGCACTGGGTCCGCCAGGCTCCAGGCAAGGGGCTGGAGTGGGTGGCAGTTATATGGTATGATGGAAGTAATAAATACTATGCAGACTCCGTGAAGGGCCGATTCACCATCTCCAGAGACAATTCCAAGAACACGCTGTATCTGCAAATGAACAGCCTGAGAGCCGAGGACACGGCTGTCTATTACTGTGCAAGAGATCATTGGAACGACTCCCCCTTTGACTCCTGGGGCCAGGGAACCCTG…	IGHV3-33*01	IGHD1-1*01	IGHJ4*02	ARDHWNDSPFDS	12	1.76991	ATGGAAGCCCCAGCTCAGCTTCTCTTCCTCCTGCTACTCTGGCTCCCAGATACCACCGGAGAAATTGTGTTGACACAGTCTCCAGCCACCCTGTCTTTGTCTCCAGGGGAAAGAGCCACCCTCTCCTGCAGGGCCAGTCAGAGTGTTAGCAGCTACTTAGCCTGGTTCCAACAGAAACCTGGCCAGGCTCCCAGGCTCCTCATCTATGATGCATCCATCAGGGCCACTGGCATCCCAGCCAGGTTCAGTGGCAGTGGGTCTGGGACAGACTTCACTCTCACCATCAGCAGCCTAGAGCCTGAAGATTTTGCAGTTTATTACTGTCAGCAGCGTAGCAACTGGCCTAAGACGTTCGGCCAAGGGACCAAGGTGGAAATCAAACG	KV3-11	KJ1	QQRSNWPKT	9	0.626959
c29192	149812	NN	ATGGAGTTTGGGCTGAGCTGGGTTTTCCTCGTTGCTCTTTTAAGAGGTGTCCAGTGTCAGGTGCAGCTGGTGGAGTCTGGGGGAGGCGTGGTCCAGCCTGGGAGGTCCCTGAGACTCTCCTGTGCAGCGTCTGGATTCACCTTCAGTACTTTTGGCATGCACTGGGTCCGCCAGGCTCCAGGCAAGGGGCTGGAGTGGGTGGCAGTTATATGGTATGATGGAAGTAATAAATACTATGCAGACTCCGTGAAGGGCCGATTCACCATCTCCAGAGACAATTCCAAGAACACGCTGTATCTGCAAATGAACAGCCTGAGAGCCGAGGACACGGCTGTCTATTACTGTGCAAGAGATCATTGGAACGACTCCCCCTTTGACTCCTGGGGCCAGGGAACCCTG…	IGHV3-33*01	IGHD1-1*01	IGHJ4*02	ARDHWNDSPFDS	12	1.76991	ATGGAAGCCCCAGCTCAGCTTCTCTTCCTCCTGCTACTCTGGCTCCCAGATACCACCGGAGAAATTGTGTTGACACAGTCTCCAGCCACCCTGTCTTTGTCTCCAGGGGAAAGAGCCACCCTCTCCTGCAGGGCCAGTCAGAGTGTTAGCAGCTACTTAGCCTGGTTCCAACAGAAACCTGGCCAGGCTCCCAGGCTCCTCATCTATGATGCATCCATCAGGGCCACTGGCATCCCAGCCAGGTTCAGTGGCAGTGGGTCTGGGACAGACTTCACTCTCACCATCAGCAGCCTAGAGCCTGAAGATTTTGCAGTTTATTACTGTCAGCAGCGTAGCAACTGGCCTAAGACGTTCGGCCAAGGGACCAAGGTGGAAATCAAACG	KV3-11	KJ1	QQRSNWPKT	9	0.626959
c28804	149812	NN	ATGGAGTTTGGGCTGAGCTGGGTTTTCCTCGTTGCTCTTTTAAGAGGTGTCCAGTGTCAGGTGCAGCTGGTGGAGTCTGGGGGAGGCGTGGTCCAGCCTGGGAGGTCCCTGAGACTCTCCTGTGCAGCGTCTGGATTCACCTTCAGTGACTTTGGCATGCACTGGGTCCGCCAGGCTCCAGGCAAGGGGCTGGAGTGGGTGGCAGTTATATGGTATGATGGAAGTAATAAATACTATGCAGACTCCGTGAAGGGCCGATTCACCATCTCCAGAGACAATTCCAAGAACACGCTGTATCTGCAAATGAACAGCCTGAGAGCCGAGGACACGGCTGTCTATTACTGTGCAAGAGATCATTGGAACGACTCCCCCTTTGACTCCTGGGGCCAGGGAACCCTG…	IGHV3-33*01	IGHD1-1*01	IGHJ4*02	ARDHWNDSPFDS	12	1.76991	ATGGAAGCCCCAGCTCAGCTTCTCTTCCTCCTGCTACTCTGGCTCCCAGATACCACCGGAGAAATTGTGTTGACACAGTCTCCAGCCACCCTGTCTTTGTCTCCAGGGGAAAGAGCCACCCTCTCCTGCAGGGCCAGTCAGAGTGTTAGCAGCTACTTAGCCTGGTTCCAACAGAAACCTGGCCAGGCTCCCAGGCTCCTCATCTATGATGCATCCATCAGGGCCACTGGCATCCCAGCCAGGTTCAGTGGCAGTGGGTCTGGGACAGACTTCACTCTCACCATCAGCAGCCTAGAGCCTGAAGATTTTGCAGTTTATTACTGTCAGCAGCGTAGCAACTGGCCTAAGACGTTCGGCCAAGGGACCAAGGTGGAAATCAAACG	KV3-11	KJ1	QQRSNWPKT	9	0.626959
c28742	149812	NN	ATGGAGTTTGGGCTGAGCTGGGTTTTCCTCGTTGCTCTTTTAAGAGGTGTCCAGTGTCAGGTGCAGCTGGTGGAGTCTGGGGGAGGCGTGGTCCAGCCTGGGAGGTCCCTGAGACTCTCCTGTGCAGCGTCTGGATTCACCTTCAGTGACTTTGGCATGCACTGGGTCCGCCAGGCTCCAGGCAAGGGGCTGGAGTGGGTGGCAGTTATATGGTATGATGGAAGTAATAAATACTATGCAGACTCCGTGAAGGGCCGATTCACCATCTCCAGAGACAATTCCAAGAACACGCTGTATCTGCAAATGAACAGCCTGAGAGCCGAGGACACGGCTGTCTATTACTGTGCAAGAGATCATTGGAACGACTCCCCCTTTGACTCCTGGGGCCAGGGAACCCTG…	IGHV3-33*01	IGHD1-1*01	IGHJ4*02	ARDHWNDSPFDS	12	1.76991	ATGGAAGCCCCAGCTCAGCTTCTCTTCCTCCTGCTACTCTGGCTCCCAGATACCACCGGAGAAATTGTGTTGACACAGTCTCCAGCCACCCTGTCTTTGTCTCCAGGGGAAAGAGCCACCCTCTCCTGCAGGGCCAGTCAGAGTGTTAGCAGCTACTTAGCCTGGTTCCAACAGAAACCTGGCCAGGCTCCCAGGCTCCTCATCTATGATGCATCCATCAGGGCCACTGGCATCCCAGCCAGGTTCAGTGGCAGTGGGTCTGGGACAGACTTCACTCTCACCATCAGCAGCCTAGAGCCTGAAGATTTTGCAGTTTATTACTGTCAGCAGCGTAGCAACTGGCCTAAGACGTTCGGCCAAGGGACCAAGGTGGAAATCAAACG	KV3-11	KJ1	QQRSNWPKT	9	0.626959
c29248	149812	NN	ATGGAGTTTGGGCTGAGCTGGGTTTTCCTCGTTGCTCTTTTAAGAGGTGTCCAGTGTCAGGTGCAGCTGGTGGAGTCTGGGGGAGGCGTGGTCCAGCCTGGGAGGTCCCTGAGACTCTCCTGTGCAGCGTCTGGATTCACCTTCAGTGACTTTGGCATGCACTGGGTCCGCCAGGCTCCAGGCAAGGGGCTGGAGTGGGTGGCAGTTATATGGTATGATGGAAGTAATAAATACTATGCAGACTCCGTGAAGGGCCGATTCACCATCTCCAGAGACAATTCCAAGAACACGCTGTATCTGCAAATGAACAGCCTGAGAGCCGAGGACACGGCTGTCTATTACTGTGCAAGAGATCATTGGAACGACTCCCCCTTTGACTCCTGGGGCCAGGGAACCCTG…	IGHV3-33*01	IGHD1-1*01	IGHJ4*02	ARDHWNDSPFDS	12	1.76991	ATGGAAGCCCCAGCTCAGCTTCTCTTCCTCCTGCTACTCTGGCTCCCAGATACCACCGGAGAAATTGTGTTGACACAGTCTCCAGCCACCCTGTCTTTGTCTCCAGGGGAAAGAGCCACCCTCTCCTGCAGGGCCAGTCAGAGTGTTAGCAGCTACTTAGCCTGGTTCCAACAGAAACCTGGCCAGGCTCCCAGGCTCCTCATCTATGATGCATCCATCAGGGCCACTGGCATCCCAGCCAGGTTCAGTGGCAGTGGGTCTGGGACAGACTTCACTCTCACCATCAGCAGCCTAGAGCCTGAAGATTTTGCAGTTTATTACTGTCAGCAGCGTAGCAACTGGCCTAAGACGTTCGGCCAAGGGACCAAGGTGGAAATCAAACG	KV3-11	KJ1	QQRSNWPKT	9	0.626959
c28743	149812	NN	ATGGAGTTTGGGCTGAGCTGGGTTTTCCTCGTTGCTCTTTTAAGAGGTGTCCAGTGTCAGGTGCAGCTGGTGGAGTCTGGGGGAGGCGTGGTCCAGCCTGGGAGGTCCCTGAGACTCTCCTGTGCAGCGTCTGGATTCACCTTCAGTGACTTTGGCATGCACTGGGTCCGCCAGGCTCCAGGCAAGGGGCTGGAGTGGGTGGCAGTTATATGGTATGATGGAAGTAATAAATACTATGCAGACTCCGTGAAGGGCCGATTCACCATCTCCAGAGACAATTCCAAGAACACGCTGTATCTGCAAATGAACAGCCTGAGAGCCGAGGACACGGCTGTCTATTACTGTGCAAGAGATCATTGGAACGACTCCCCCTTTGACTCCTGGGGCCAGGGAACCCTG…	IGHV3-33*01	IGHD1-1*01	IGHJ4*02	ARDHWNDSPFDS	12	1.76991	ATGGAAGCCCCAGCTCAGCTTCTCTTCCTCCTGCTACTCTGGCTCCCAGATACCACCGGAGAAATTGTGTTGACACAGTCTCCAGCCACCCTGTCTTTGTCTCCAGGGGAAAGAGCCACCCTCTCCTGCAGGGCCAGTCAGAGTGTTAGCAGCTACTTAGCCTGGTTCCAACAGAAACCTGGCCAGGCTCCCAGGCTCCTCATCTATGATGCATCCATCAGGGCCACTGGCATCCCAGCCAGGTTCAGTGGCAGTGGGTCTGGGACAGACTTCACTCTCACCATCAGCAGCCTAGAGCCTGAAGATTTTGCAGTTTATTACTGTCAGCAGCGTAGCAACTGGCCTAAGACGTTCGGCCAAGGGACCAAGGTGGAAATCAAACG	KV3-11	KJ1	QQRSNWPKT	9	0.626959
c29041	149812	NN	ATGGAGTTTGGGCTGAGCTGGGTTTTCCTCGTTGCTCTTTTAAGAGGTGTCCAGTGTCAGGTGCAGCTGGTGGAGTCTGGGGGAGGCGTGGTCCAGCCTGGGAGGTCCCTGAGACTCTCCTGTGCAGCGTCTGGATTCACCTTCAGTGACTTTGGCATGCACTGGGTCCGCCAGGCTCCAGGCAAGGGGCTGGAGTGGGTGGCAGTTATATGGTATGATGGAAGTAATAAATACTATGCAGACTCCGTGAAGGGCCGATTCACCATCTCCAGAGACAATTCCAAGAACACGCTGTATCTGCAAATGAACAGCCTGAGAGCCGAGGACACGGCTGTCTATTACTGTGCAAGAGATCATTGGAACGACTCCCCCTTTGACTCCTGGGGCCAGGGAACCCTG…	IGHV3-33*01	IGHD1-1*01	IGHJ4*02	ARDHWNDSPFDS	12	1.76991	ATGGAAGCCCCAGCTCAGCTTCTCTTCCTCCTGCTACTCTGGCTCCCAGATACCACCGGAGAAATTGTGTTGACACAGTCTCCAGCCACCCTGTCTTTGTCTCCAGGGGAAAGAGCCACCCTCTCCTGCAGGGCCAGTCAGAGTGTTAGCAGCTACTTAGCCTGGTTCCAACAGAAACCTGGCCAGGCTCCCAGGCTCCTCATCTATGATGCATCCATCAGGGCCACTGGCATCCCAGCCAGGTTCAGTGGCAGTGGGTCTGGGACAGACTTCACTCTCACCATCAGCAGCCTAGAGCCTGAAGATTTTGCAGTTTATTACTGTCAGCAGCGTAGCAACTGGCCTAAGACGTTCGGCCAAGGGACCAAGGTGGAAATCAAACG	KV3-11	KJ1	QQRSNWPKT	9	0.626959
c29050	149812	NN	ATGGAGTTTGGGCTGAGCTGGGTTTTCCTCGTTGCTCTTTTAAGAGGTGTCCAGTGTCAGGTGCAGCTGGTGGAGTCTGGGGGAGGCGTGGTCCAGCCTGGGAGGTCCCTGAGACTCTCCTGTGCAGCGTCTGGATTCACCTTCAGTGACTTTGGCATGCACTGGGTCCGCCAGGCTCCAGGCAAGGGGCTGGAGTGGGTGGCAGTTATATGGTATGATGGAAGTAATAAATACTATGCAGACTCCGTGAAGGGCCGATTCACCATCTCCAGAGACAATTCCAAGAACACGCTGTATCTGCAAATGAACAGCCTGAGAGCCGAGGACACGGCTGTCTATTACTGTGCAAGAGATCATTGGAACGACTCCCCCTTTGACTCCTGGGGCCAGGGAACCCTG…	IGHV3-33*01	IGHD1-1*01	IGHJ4*02	ARDHWNDSPFDS	12	1.76991	ATGGAAGCCCCAGCTCAGCTTCTCTTCCTCCTGCTACTCTGGCTCCCAGATACCACCGGAGAAATTGTGTTGACACAGTCTCCAGCCACCCTGTCTTTGTCTCCAGGGGAAAGAGCCACCCTCTCCTGCAGGGCCAGTCAGAGTGTTAGCAGCTACTTAGCCTGGTTCCAACAGAAACCTGGCCAGGCTCCCAGGCTCCTCATCTATGATGCATCCATCAGGGCCACTGGCATCCCAGCCAGGTTCAGTGGCAGTGGGTCTGGGACAGACTTCACTCTCACCATCAGCAGCCTAGAGCCTGAAGATTTTGCAGTTTATTACTGTCAGCAGCGTAGCAACTGGCCTAAGACGTTCGGCCAAGGGACCAAGGTGGAAATCAAACG	KV3-11	KJ1	QQRSNWPKT	9	0.626959
c29193	149812	NN	ATGAAACACCTGTGGTTCTTCCTCCTGCTGGTGGCAGCTCCCAGATGGGTCCTGTCCCAGGTGCAGCTGCAGGAGTCGGGCCCAGGACTGGTGAAGCCTTCACAGACCCTGTCCCTCACCTGTACTGTCTCTGGTGGCTCCATCAGCAGTGGTGGTTACTACTGGAGCTGGATCCGCCAGTACCCAGGGAAGGGCCTGGAGTGGATTGGGTTCATCTATCACAGTGGGAGCACCTACTACAACCCGTCCCTCAAGAGTCGACTTACCATATCAGTTGACACGTCTAAGAACCAGTTCTCCCTGAAGCTGAGCTCTGTGACTGCCGCGGACACGGCCGTGTATTACTGTGCGAGAGGTGGGGGCTATGTTTCGGGGACTTACTACTTTGACTACTGGGGC…	IGHV4-31*02	IGHD3-10*01	IGHJ4*02	ARGGGYVSGTYYFDY	15	1.44928	ATGGAAGCCCCAGCGCAGCTTCTCTTCCTCCTGCTACTCTGGCTCCCAGATACCACTGGAGAAATAGTGATGACGCAGTCTCCAGCCACCCTGTCTGTGTCTCCAGGGGAAGGAGCCACCCTCTCCTGCAGGGCCAGTCAGAGTGTTAGCAGCAACTTAGCCTGGTACCAGCAGAAACCTGGCCAGGCTCCCAGGCTCCTCATCTATGGTGCATCCACCAGGGCCACTGGTATCCCAGCCAGGTTCAGTGGCAGTGGGTCTGGGACAGAGTTCACTCTCGCCATCAGCAGCCTGCAGTCTGAAGATTTTGCAGTTTATTTCTGTCAGCAGTATAATAACTGGCCTCCGTGGACGTTCGGCCAAGGGACCAAGGTGGAAATCAAACG	KV3-15	KJ1	QQYNNWPPWT	10	0.925926
c28865	149812	NN	ATGGACCTCCTGTGCAAGAACATGAAGCACCTGTGGTTTTTCCTCCTGCTGGTGGCAGCTCCCAGATGGGTCCTGTCCCAGGTGCAGCTGCAGGAGTCGGGCCCAGGACTGGTGAAGCCTTCGGAGACCCTGTCCCTCACCTGCGCCGTCTCTGATTACTCCATCAGCAGTGGTTACTATTGGGGCTGGATTCGACAGGCCCCCGGGAAGGGGCTGGAGTGGATTGGCAGTATCTTTCATAGTGGGACCACCTACTACAACCCGTCCCTCAAGAGTCGGGTCACCATATCCGTTGACACGTCCGAGAATCAGTTGTCCCTGAAGTTGAACTCTGTGACCGCCGCAGACACGGCCGTCTATTACTGTGCGAGAGATCACTTAGCAGTGGTCGCTACTACG…	IGHV4-38-2*02	IGHD6-19*01	IGHJ4*02	ARDHLAVVATTRPYYFDY	18	6.70554	ATGGAAGCCCCAGCTCAGCTTCTCTTCCTCCTGCTACTCTGGCTCCCAGATACTACCGGAGAAATTGTGTTGACACAGTCTCCAGCCACCCTGTCTTTGTCTCCGGGGGAAAGAGCCACCCTCTCCTGCAGGGCCAGTCAGAGTGTTAGGAGCTCCTTAGCCTGGTACCAACAGAGACCTGGCCAGAGTCCCAGACTCCTCATCTATGATACGTCCAACAGGCCCACTGGCATCCCAGTCAGGTTCAGTGGCAGTGGGTCTGGGACAGACTTCACTCTCTCCATCAGCAGCCTAGAACCTGAAGATTTTGCAGTTTATTACTGTCAGCAGCGTAGCAACTGGCCTCTTGCGCTCACTTTCGGCGGAGGGACCAAGGTGGAGATCAAACG	KV3-11	KJ4	QQRSNWPLALT	11	4.02477
c29149	149812	NN	ATGGAGTTGGGGCTGAGCTGGGTTTTCCTTGTTGCTATATTAGAAGGTGTCCAGTGTGAGGTGCAACTGGTGGAGTCTGGGGGAGGGTTGATACAGCCTGGGGGGTCCCTGAGACTCTCCTGTGCAGCCTCTGGATTCACCATCAGTTACTACGACATGCACTGGGTCCGCCAGCCTACAGGAAAAGGTCTGGAATGGCTCTCAGTTATTGGTAGTGCTGGTGACACACACTATCCAGGCTCCGTAAAGGGCCGATTCACCATCTCCAGAGACATTGCCAAGAACTCCTTGTATCTTCAAATGAACAGCCTGAGAGCCGGGGACACGGCTGTATATTATTGTACAAGATCTCCCCCTATCCCGGGTGACTACCTCAGTGGTCTGGACGTCTGGGGCCTA…	IGHV3-13*04	IGHD4-17*01	IGHJ6*02	TRSPPIPGDYLSGLDV	16	6.0241	ATGGCCTGGGCTCTGCTGCTCCTCACCCTCCTCACTCAGGGCACAGGGTCCTGGGCCCAGTCTGCCCTGACTCAGCCTGCCTCCGTGTCTGGGTCTCCTGGACAGTCGATCACCATCTCCTGCACTGGAACCAGCAGTGACGTTGGTGGTCATAATTATATCTCCTGGTACCAACACCACCCAGGCAAAGTCCCCAAATTAATGATTTATGAAGTCAGTAATCGGCCCTCAGGAATTTCTAATCGCTTCTCTGGCTCCAAGTCTGGCAACACGGCCTCCCTGACCATCTCTGGGCTCCAGGCTGAGGACGAGGCTGAATATTACTGCAGCTCATATACATTCACCATCACCCCCTATGTCTTCGGAACTGGGACCAAGGTCACCGTCCTAGG	LV2-14	LJ1	SSYTFTITPYV	11	4.55927
c29133	149812	NN	ATGGAGTTGGGGCTGAGCTGGGTTTTCCTTGTTGCTATATTAGAAGGTGTCCAGTGTGAGGTGCAACTGGTGGAGTCTGGGGGAGGGTTGATACAGCCTGGGGGGTCCCTGAGACTCTCCTGTGCAGCCTCTGGATTCACCATCAGTTACTACGACATGCACTGGGTCCGCCAGCCTACAGGAAAAGGTCTGGAATGGCTCTCAGTTATTGGTAGTGCTGGTGACACACACTATCCAGGCTCCGTAAAGGGCCGATTCACCATCTCCAGAGACATTGCCAAGAACTCCTTGTATCTTCAAATGAACAGCCTGAGAGCCGGGGACACGGCTGTATATTATTGTACAAGATCTCCCCCTATCCCGGGTGACTACCTCAGTGGTCTGGACGTCTGGGGCCTA…	IGHV3-13*04	IGHD4-17*01	IGHJ6*02	TRSPPIPGDYLSGLDV	16	6.0241	ATGGCCTGGGCTCTGCTGCTCCTCACCCTCCTCACTCAGGGCACAGGGTCCTGGGCCCAGTCTGCCCTGACTCAGCCTGCCTCCGTGTCTGGGTCTCCTGGACAGTCGATCACCATCTCCTGCACTGGAACCAGCAGTGACGTTGGTGGTCATAATTATATCTCCTGGTACCAACACCACCCAGGCAAAGTCCCCAAATTAATGATTTATGAAGTCAGTAATCGGCCCTCAGGAATTTCTAATCGCTTCTCTGGCTCCAAGTCTGGCAACACGGCCTCCCTGACCATCTCTGGGCTCCAGGCTGAGGACGAGGCTGAATATTACTGCAGCTCATATACATTCACCATCACCCCCTATGTCTTCGGAACTGGGACCAAGGTCACCGTCCTAGG	LV2-14	LJ1	SSYTFTITPYV	11	4.55927
c28879	149812	NN	ATGGAGTTGGGGCTGAGCTGGGTTTTCCTTGTTGCTATATTAGAAGGTGTCCAGTGTGAGGTGCAACTGGTGGAGTCTGGGGGAGGGTTGATACAGCCTGGGGGGTCCCTGAGACTCTCCTGTGCAGCCTCTGGATTCACCATCAGTTACTACGACATGCACTGGGTCCGCCAGCCTACAGGAAAAGGTCTGGAATGGCTCTCAGTTATTGGTAGTGCTGGTGACACACACTATCCAGGCTCCGTAAAGGGCCGATTCACCATCTCCAGAGACATTGCCAAGAACTCCTTGTATCTTCAAATGAACAGCCTGAGAGCCGGGGACACGGCTGTATATTATTGTACAAGATCTCCCCCTATCCCGGGTGACTACCTCAGTGGTCTGGACGTCTGGGGCCTA…	IGHV3-13*04	IGHD4-17*01	IGHJ6*02	TRSPPIPGDYLSGLDV	16	6.0241	ATGGCCTGGGCTCTGCTGCTCCTCACCCTCCTCACTCAGGGCACAGGGTCCTGGGCCCAGTCTGCCCTGACTCAGCCTGCCTCCGTGTCTGGGTCTCCTGGACAGTCGATCACCATCTCCTGCACTGGAACCAGCAGTGACGTTGGTGGTCATAATTATATCTCCTGGTACCAACACCACCCAGGCAAAGTCCCCAAATTAATGATTTATGAAGTCAGTAATCGGCCCTCAGGAATTTCTAATCGCTTCTCTGGCTCCAAGTCTGGCAACACGGCCTCCCTGACCATCTCTGGGCTCCAGGCTGAGGACGAGGCTGAATATTACTGCAGCTCATATACATTCACCATCACCCCCTATGTCTTCGGAACTGGGACCAAGGTCACCGTCCTAGG	LV2-14	LJ1	SSYTFTITPYV	11	4.55927
c28974	149812	NN	ATGGAGTTGGGGCTGAGCTGGGTTTTCCTTGTTGCTATATTAGAAGGTGTCCAGTGTGAGGTGCAACTGGTGGAGTCTGGGGGAGGGTTGATACAGCCTGGGGGGTCCCTGAGACTCTCCTGTGCAGCCTCTGGATTCACCATCAGTTACTACGACATGCACTGGGTCCGCCAGCCTACAGGAAAAGGTCTGGAATGGCTCTCAGTTATTGGTAGCGCTGGTGACACACACTATCCAGGCTCCGTAAAGGGCCGATTCACCATCTCCAGAGACATTGCCAAGAACTCCTTGTATCTTCAAATGAACAGCCTGAGAGCCGGGGACACGGCTGTATATTATTGTACAAGATCTCCCCCTATCCCGGGTGACTACCTCAGTGGTCTGGACGTCTGGGGCCTA…	IGHV3-13*04	IGHD4-17*01	IGHJ6*02	TRSPPIPGDYLSGLDV	16	6.3253	ATGGCCTGGGCTCTGCTGCTCCTCACCCTCCTCACTCAGGGCACAGGGTCCTGGGCCCAGTCTGCCCTGACTCAGCCTGCCTCCGTGTCTGGGTCTCCTGGACAGTCGATCACCATCTCCTGCACTGGAACCAGCAGTGACGTTGGTGGTCATAATTATATCTCCTGGTACCAACACCACCCAGGCAAAGTCCCCAAATTAATGATTTATGAAGTCAGTAATCGGCCCTCAGGAATTTCTAATCGCTTCTCTGGCTCCAAGTCTGGCAACACGGCCTCCCTGACCATCTCTGGGCTCCAGGCTGAGGACGAGGCTGAATATTACTGCAGCTCATATACATTCACCATCACCCCCTATGTCTTCGGAACTGGGACCAAGGTCACCGTCCTAGG	LV2-14	LJ1	SSYTFTITPYV	11	4.55927
c28774	149812	NN	ATGGAGTTGGGGCTGAGCTGGGTTTTCCTTGTTGCTATATTAGAAGGTGTCCAGTGTGAGGTGCAACTGGTGGAGTCTGGGGGAGGGTTGATACAGCCTGGGGGGTCCCTGAGACTCTCCTGTGCAGCCTCTGGATTCACCATCAGTTACTACGACATGCACTGGGTCCGCCAGCCTACAGGAAAAGGTCTGGAATGGCTCTCAGTTATTGGTAGTGCTGGTGACACACACTATCCAGGCTCCGTAAAGGGCCGATTCACCATCTCCAGAGACATTGCCAAGAACTCCTTGTATCTTCAAATGAACAGCCTGAGAGCCGGGGACACGGCTGTATATTATTGTACAAGATCTCCCCCTATCCCGGGTGACTACCTCAGTGGTCTGGACGTCTGGGGCCTA…	IGHV3-13*04	IGHD4-17*01	IGHJ6*02	TRSPPIPGDYLSGLDV	16	6.0241	ATGGCCTGGGCTCTGCTGCTCCTCACCCTCCTCACTCAGGGCACAGGGTCCTGGGCCCAGTCTGCCCTGACTCAGCCTGCCTCCGTGTCTGGGTCTCCTGGACAGTCGATCACCATCTCCTGCACTGGAACCAGCAGTGACGTTGGTGGTCATAATTATATCTCCTGGTACCAACACCACCCAGGCAAAGTCCCCAAATTAATGATTTATGAAGTCAGTAATCGGCCCTCAGGAATTTCTAATCGCTTCTCTGGCTCCAAGTCTGGCAACACGGCCTCCCTGACCATCTCTGGGCTCCAGGCTGAGGACGAGGCTGAATATTACTGCAGCTCATATACATTCACCATCACCCCCTATGTCTTCGGAACTGGGACCAAGGTCACCGTCCTAGG	LV2-14	LJ1	SSYTFTITPYV	11	4.55927
c28655	149812	NN	ATGGAGTTGGGGCTGAGCTGGGTTTTCCTTGTTGCTATATTAGAAGGTGTCCAGTGTGAGGTGCAACTGGTGGAGTCTGGGGGAGGGTTGATACAGCCTGGGGGGTCCCTGAGACTCTCCTGTGCAGCCTCTGGATTCACCATCAGTTACTACGACATGCACTGGGTCCGCCAGCCTACAGGAAAAGGTCTGGAATGGCTCTCAGTTATTGGTAGTGCTGGTGACACACACTATCCAGGCTCCGTAAAGGGCCGATTCACCATCTCCAGAGACATTGCCAAGAACTCCTTGTATCTTCAAATGAACAGCCTGAGAGCCGGGGACACGGCTGTATATTATTGTACAAGATCTCCCCCTATCCCGGGTGACTACCTCAGTGGTCTGGACGTCTGGGGCCTA…	IGHV3-13*04	IGHD4-17*01	IGHJ6*02	TRSPPIPGDYLSGLDV	16	6.0241	ATGGCCTGGGCTCTGCTGCTCCTCACCCTCCTCACTCAGGGCACAGGGTCCTGGGCCCAGTCTGCCCTGACTCAGCCTGCCTCCGTGTCTGGGTCTCCTGGACAGTCGATCACCATCTCCTGCACTGGAACCAGCAGTGACGTTGGTGGTCATAATTATATCTCCTGGTACCAACACCACCCAGGCAAAGTCCCCAAATTAATGATTTATGAAGTCAGTAATCGGCCCTCAGGAATTTCTAATCGCTTCTCTGGCTCCAAGTCTGGCAACACGGCCTCCCTGACCATCTCTGGGCTCCAGGCTGAGGACGAGGCTGAATATTACTGCAGCTCATATACATTCACCATCACCCCCTATGTCTTCGGAACTGGGACCAAGGTCACCGTCCTAGG	LV2-14	LJ1	SSYTFTITPYV	11	4.55927
c28762	149812	NN	ATGGAGTTGGGGCTGAGCTGGGTTTTCCTTGTTGCTATATTAGAAGGTGTCCAGTGTGAGGTGCAACTGGTGGAGTCTGGGGGAGGGTTGATACAGCCTGGGGGGTCCCTGAGACTCTCCTGTGCAGCCTCTGGATTCACCATCAGTTACTACGACATGCACTGGGTCCGCCAGCCTACAGGAAAAGGTCTGGAATGGCTCTCAGTTATTGGTAGTGCTGGTGACACACACTATCCAGGCTCCGTAAAGGGCCGATTCACCATCTCCAGAGACATTGCCAAGAACTCCTTGTATCTTCAAATGAACAGCCTGAGAGCCGGGGACACGGCTGTATATTATTGTACAAGATCTCCCCCTATCCCGGGTGACTACCTCAGTGGTCTGGACGTCTGGGGCCTA…	IGHV3-13*04	IGHD4-17*01	IGHJ6*02	TRSPPIPGDYLSGLDV	16	6.0241	ATGGCCTGGGCTCTGCTGCTCCTCACCCTCCTCACTCAGGGCACAGGGTCCTGGGCCCAGTCTGCCCTGACTCAGCCTGCCTCCGTGTCTGGGTCTCCTGGACAGTCGATCACCATCTCCTGCACTGGAACCAGCAGTGACGTTGGTGGTCATAATTATATCTCCTGGTACCAACACCACCCAGGCAAAGTCCCCAAATTAATGATTTATGAAGTCAGTAATCGGCCCTCAGGAATTTCTAATCGCTTCTCTGGCTCCAAGTCTGGCAACACGGCCTCCCTGACCATCTCTGGGCTCCAGGCTGAGGACGAGGCTGAATATTACTGCAGCTCATATACATTCACCATCACCCCCTATGTCTTCGGAACTGGGACCAAGGTCACCGTCCTAGG	LV2-14	LJ1	SSYTFTITPYV	11	4.55927
c28883	149812	NN	ATGGAGTTGGGGCTGAGCTGGGTTTTCCTTGTTGCTATATTAGAAGGTGTCCAGTGTGAGGTGCAACTGGTGGAGTCTGGGGGAGGGTTGATACAGCCTGGGGGGTCCCTGAGACTCTCCTGTGCAGCCTCTGGATTCACCATCAGTTACTACGACATGCACTGGGTCCGCCAGCCTACAGGAAAAGGTCTGGAATGGCTCTCAGTTATTGGTAGTGCTGGTGACACACACTATCCAGGCTCCGTAAAGGGCCGATTCACCATCTCCAGAGACATTGCCAAGAACTCCTTGTATCTTCAAATGAACAGCCTGAGAGCCGGGGACACGGCTGTATATTATTGTACAAGATCTCCCCCTATCCCGGGTGACTACCTCAGTGGTCTGGACGTCTGGGGCCTA…	IGHV3-13*04	IGHD4-17*01	IGHJ6*02	TRSPPIPGDYLSGLDV	16	6.0241	ATGGCCTGGGCTCTGCTGCTCCTCACCCTCCTCACTCAGGGCACAGGGTCCTGGGCCCAGTCTGCCCTGACTCAGCCTGCCTCCGTGTCTGGGTCTCCTGGACAGTCGATCACCATCTCCTGCACTGGAACCAGCAGTGACGTTGGTGGTCATAATTATATCTCCTGGTACCAACACCACCCAGGCAAAGTCCCCAAATTAATGATTTATGAAGTCAGTAATCGGCCCTCAGGAATTTCTAATCGCTTCTCTGGCTCCAAGTCTGGCAACACGGCCTCCCTGACCATCTCTGGGCTCCAGGCTGAGGACGAGGCTGAATATTACTGCAGCTCATATACATTCACCATCACCCCCTATGTCTTCGGAACTGGGACCAAGGTCACCGTCCTAGG	LV2-14	LJ1	SSYTFTITPYV	11	4.55927
c29131	149812	NN	ATGGAGTTTGGGCTGAGCTGGGTTTTCCTTGTTGCTATTTTAAAAGGTGTCCAATGTGAGCTGCAACTGGTGGAGTCTGGGGGAGGCTTGGTCCAACCTGGGGGGTCCCTGAGACTCTCCTGTGCAGCCTCTGGATTCACCGTCAGTAGCAGCTTCATGAGCTGGGTCCGCCAGGCTCCAGGGAAGGGGCTAGAGTGGCTCGCAGTTATTTATAGCGGTGGTAGCACAAACTACGCAGATTCCGTGAAGGGCAGATTCACCATCTCCAGAGACACTTCTAAGAACACACTGTATCTTCAGATGAACAGCCTGAGAGCCGAAGACACGGCTGTGTATTACTGTACGAGAGAGCCGAATCGTGGATACACTTCTTATTACGGTATGGACGTCTGGGGCCAA…	IGHV3-66*01	IGHD5-18*01	IGHJ6*02	TREPNRGYTSYYGMDV	16	4.98534	ATGGAAGCCCCAGCGCAGCTTCTCTTCCTCCTGCTACTCTGGCTCCCAGATACCACTGGAGAAATAGTGATGACGCAGTCTCCAGCCGCCCTGTCTGTGTCTCCAGGGGAAAGCGCCACCCTCTCCTGCAGGGCCAGTCAGAGTGTTCGCAGCAGCTTAGCCTGGTATCAGCAGAAACCTGGCCAGGCTCCCAGGCTCCTCATCTATGGTGCATCTACCAGGGCCACTGGCATACCCGCCAGGTTTAGTGGCAGTGGGTCTGGGACAGAGTTCACTCTCACCATCAGCAGCCTGCAGTCTGAGGATTTTGCAATTTATTACTGTCAGCAATATAATAACTGGCCTCGGACTTTTGGCCAGGGGACCAAGCTGGAGATCAAACG	KV3D-15	KJ2	QQYNNWPRT	9	3.76176
c29134	149812	NN	ATGGAGTTTGGGCTGAGCTGGGTTTTCCTTGTTGCTATTTTAAAAGGTGTCCAATGTGAGCTGCAACTGGTGGAGTCTGGGGGAGGCTTGGTCCAACCTGGGGGGTCCCTGAGACTCTCCTGTGCAGCCTCTGGATTCACCGTCAGTAGCAGCTTCATGAGCTGGGTCCGCCAGGCTCCAGGGAAGGGGCTAGAGTGGCTCGCAGTTATTTATAGCGGTGGTAGCACAAACTACGCAGATTCCGTGAAGGGCAGATTCACCATCTCCAGAGACACTTCTAAGAACACACTGTATCTTCAGATGAACAGCCTGAGAGCCGAAGACACGGCTGTGTATTACTGTACGAGAGAGCCGAATCGTGGATACACTTCTTATTACGGTATGGACGTCTGGGGCCAA…	IGHV3-66*01	IGHD5-18*01	IGHJ6*02	TREPNRGYTSYYGMDV	16	4.98534	ATGGAAGCCCCAGCGCAGCTTCTCTTCCTCCTGCTACTCTGGCTCCCAGATACCACTGGAGAAATAGTGATGACGCAGTCTCCAGCCGCCCTGTCTGTGTCTCCAGGGGAAAGCGCCACCCTCTCCTGCAGGGCCAGTCAGAGTGTTCGCAGCAGCTTAGCCTGGTATCAGCAGAAACCTGGCCAGGCTCCCAGGCTCCTCATCTATGGTGCATCTACCAGGGCCACTGGCATACCCGCCAGGTTTAGTGGCAGTGGGTCTGGGACAGAGTTCACTCTCACCATCAGCAGCCTGCAGTCTGAGGATTTTGCAATTTATTACTGTCAGCAATATAATAACTGGCCTCGGACTTTTGGCCAGGGGACCAAGCTGGAGATCAAACG	KV3D-15	KJ2	QQYNNWPRT	9	3.76176
c29176	149812	NN	ATGGAGTTTGGGCTGAGCTGGGTTTTCCTTGTTGCTATTTTAAAAGGTGTCCAATGTGAGCTGCAACTGGTGGAGTCTGGGGGAGGCTTGGTCCAACCTGGGGGGTCCCTGAGACTCTCCTGTGCAGCCTCTGGATTCACCGTCAGTAGCAGCTTCATGAGCTGGGTCCGCCAGGCTCCAGGGAAGGGGCTAGAGTGGCTCGCAGTTATTTATAGCGGTGGTAGCACAAACTACGCAGATTCCGTGAAGGGCAGATTCACCATCTCCAGAGACACTTCTAAGAACACACTGTATCTTCAGATGAACAGCCTGAGAGCCGAAGACACGGCTGTGTATTACTGTACGAGAGAGCCGAATCGTGGATACACTTCTTATTACGGTATGGACGTCTGGGGCCAA…	IGHV3-66*01	IGHD5-18*01	IGHJ6*02	TREPNRGYTSYYGMDV	16	4.98534	ATGGAAGCCCCAGCGCAGCTTCTCTTCCTCCTGCTACTCTGGCTCCCAGATACCACTGGAGAAATAGTGATGACGCAGTCTCCAGCCGCCCTGTCTGTGTCTCCAGGGGAAAGCGCCACCCTCTCCTGCAGGGCCAGTCAGAGTGTTCGCAGCAGCTTAGCCTGGTATCAGCAGAAACCTGGCCAGGCTCCCAGGCTCCTCATCTATGGTGCATCTACCAGGGCCACTGGCATACCCGCCAGGTTTAGTGGCAGTGGGTCTGGGACAGAGTTCACTCTCACCATCAGCAGCCTGCAGTCTGAGGATTTTGCAATTTATTACTGTCAGCAATATAATAACTGGCCTCGGACTTTTGGCCAGGGGACCAAGCTGGAGATCAAACG	KV3D-15	KJ2	QQYNNWPRT	9	3.76176
c28823	149812	NN	ATGGAGTTTGGGCTGAGCTGGGTTTTCCTTGTTGCTATTTTAAAAGGTGTCCAATGTGAGCTGCAACTGGTGGAGTCTGGGGGAGGCTTGGTCCAACCTGGGGGGTCCCTGAGACTCTCCTGTGCAGCCTCTGGATTCACCGTCAGTAGCAGCTTCATGAGCTGGGTCCGCCAGGCTCCAGGGAAGGGGCTAGAGTGGCTCGCAGTTATTTATAGCGGTGGTAGCACAAACTACGCAGATTCCGTGAAGGGCAGATTCACCATCTCCAGAGACACTTCTAAGAACACACTGTATCTTCAGATGAACAGCCTGAGAGCCGAAGACACGGCTGTGTATTACTGTACGAGAGAGCCGAATCGTGGATACACTTCTTATTACGGTATGGACGTCTGGGGCCAA…	IGHV3-66*01	IGHD5-18*01	IGHJ6*02	TREPNRGYTSYYGMDV	16	4.98534	ATGGAAGCCCCAGCGCAGCTTCTCTTCCTCCTGCTACTCTGGCTCCCAGATACCACTGGAGAAATAGTGATGACGCAGTCTCCAGCCGCCCTGTCTGTGTCTCCAGGGGAAAGCGCCACCCTCTCCTGCAGGGCCAGTCAGAGTGTTCGCAGCAGCTTAGCCTGGTATCAGCAGAAACCTGGCCAGGCTCCCAGGCTCCTCATCTATGGTGCATCTACCAGGGCCACTGGCATACCCGCCAGGTTTAGTGGCAGTGGGTCTGGGACAGAGTTCACTCTCACCATCAGCAGCCTGCAGTCTGAGGATTTTGCAATTTATTACTGTCAGCAATATAATAACTGGCCTCGGACTTTTGGCCAGGGGACCAAGCTGGAGATCAAACG	KV3D-15	KJ2	QQYNNWPRT	9	3.76176
c28821	149812	NN	ATGGAGTTTGGGCTGAGCTGGGTTTTCCTTGTTGCTATTTTAAAAGGTGTCCAATGTGAGCTGCAACTGGTGGAGTCTGGGGGAGGCTTGGTCCAACCTGGGGGGTCCCTGAGACTCTCCTGTGCAGCCTCTGGATTCACCGTCAGTAGCAGCTTCATGAGCTGGGTCCGCCAGGCTCCAGGGAAGGGGCTAGAGTGGCTCGCAGTTATTTATAGCGGTGGTAGCACAAACTACGCAGATTCCGTGAAGGGCAGATTCACCATCTCCAGAGACACTTCTAAGAACACACTGTATCTTCAGATGAACAGCCTGAGAGCCGAAGACACGGCTGTGTATTACTGTACGAGAGAGCCGAATCGTGGATACACTTCTTATTACGGTATGGACGTCTGGGGCCAA…	IGHV3-66*01	IGHD5-18*01	IGHJ6*02	TREPNRGYTSYYGMDV	16	4.98534	ATGGAAGCCCCAGCGCAGCTTCTCTTCCTCCTGCTACTCTGGCTCCCAGATACCACTGGAGAAATAGTGATGACGCAGTCTCCAGCCGCCCTGTCTGTGTCTCCAGGGGAAAGCGCCACCCTCTCCTGCAGGGCCAGTCAGAGTGTTCGCAGCAGCTTAGCCTGGTATCAGCAGAAACCTGGCCAGGCTCCCAGGCTCCTCATCTATGGTGCATCTACCAGGGCCACTGGCATACCCGCCAGGTTTAGTGGCAGTGGGTCTGGGACAGAGTTCACTCTCACCATCAGCAGCCTGCAGTCTGAGGATTTTGCAATTTATTACTGTCAGCAATATAATAACTGGCCTCGGACTTTTGGCCAGGGGACCAAGCTGGAGATCAAACG	KV3D-15	KJ2	QQYNNWPRT	9	3.76176
c28758	149812	NN	ATGGAGTTTGGGCTGAGCTGGGTTTTCCTTGTTGCTATTTTAAAAGGTGTCCAATGTGAGCTGCAACTGGTGGAGTCTGGGGGAGGCTTGGTCCAACCTGGGGGGTCCCTGAGACTCTCCTGTGCAGCCTCTGGATTCACCGTCAGTAGCAGCTTCATGAGCTGGGTCCGCCAGGCTCCAGGGAAGGGGCTAGAGTGGCTCGCAGTTATTTATAGCGGTGGTAGCACAAACTACGCAGATTCCGTGAAGGGCAGATTCACCATCTCCAGAGACACTTCTAAGAACACACTGTATCTTCAGATGAACAGCCTGAGAGCCGAAGACACGGCTGTGTATTACTGTACGAGAGAGCCGAATCGTGGATACACTTCTTATTACGGTATGGACGTCTGGGGCCAA…	IGHV3-66*01	IGHD5-18*01	IGHJ6*02	TREPNRGYTSYYGMDV	16	4.98534	ATGGAAGCCCCAGCGCAGCTTCTCTTCCTCCTGCTACTCTGGCTCCCAGATACCACTGGAGAAATAGTGATGACGCAGTCTCCAGCCGCCCTGTCTGTGTCTCCAGGGGAAAGCGCCACCCTCTCCTGCAGGGCCAGTCAGAGTGTTCGCAGCAGCTTAGCCTGGTATCAGCAGAAACCTGGCCAGGCTCCCAGGCTCCTCATCTATGGTGCATCTACCAGGGCCACTGGCATACCCGCCAGGTTTAGTGGCAGTGGGTCTGGGACAGAGTTCACTCTCACCATCAGCAGCCTGCAGTCTGAGGATTTTGCAATTTATTACTGTCAGCAATATAATAACTGGCCTCGGACTTTTGGCCAGGGGACCAAGCTGGAGATCAAACG	KV3D-15	KJ2	QQYNNWPRT	9	3.76176
c28854	149812	NN	ATGGAGTTTGGGCTGAGCTGGGTTTTCCTTGTTGCTATTTTAAAAGGTGTCCAATGTGAGCTGCAACTGGTGGAGTCTGGGGGAGGCTTGGTCCAACCTGGGGGGTCCCTGAGACTCTCCTGTGCAGCCTCTGGATTCACCGTCAGTAGCAGCTTCATGAGCTGGGTCCGCCAGGCTCCAGGGAAGGGGCTAGAGTGGCTCGCAGTTATTTATAGCGGTGGTAGCACAAACTACGCAGATTCCGTGAAGGGCAGATTCACCATCTCCAGAGACACTTCTAAGAACACACTGTATCTTCAGATGAACAGCCTGAGAGCCGAAGACACGGCTGTGTATTACTGTACGAGAGAGCCGAATCGTGGATACACTTCTTATTACGGTATGGACGTCTGGGGCCAA…	IGHV3-66*01	IGHD5-18*01	IGHJ6*02	TREPNRGYTSYYGMDV	16	4.98534	ATGGAAGCCCCAGCGCAGCTTCTCTTCCTCCTGCTACTCTGGCTCCCAGATACCACTGGAGAAATAGTGATGACGCAGTCTCCAGCCGCCCTGTCTGTGTCTCCAGGGGAAAGCGCCACCCTCTCCTGCAGGGCCAGTCAGAGTGTTCGCAGCAGCTTAGCCTGGTATCAGCAGAAACCTGGCCAGGCTCCCAGGCTCCTCATCTATGGTGCATCTACCAGGGCCACTGGCATACCCGCCAGGTTTAGTGGCAGTGGGTCTGGGACAGAGTTCACTCTCACCATCAGCAGCCTGCAGTCTGAGGATTTTGCAATTTATTACTGTCAGCAATATAATAACTGGCCTCGGACTTTTGGCCAGGGGACCAAGCTGGAGATCAAACG	KV3D-15	KJ2	QQYNNWPRT	9	3.76176
c28908	149812	NN	ATGAAACATCTGTGGTTCTTCCTTCTCCTGGTGGCAGCTCCCAGATGGGTCCTGTCCCAGGTGCAGCTGCAGGAGTCGGGCCCAGGACTGGTGAAGCCTTCGGAGACCCTGTCCCTCGCCTGCACTGTCTCTGGTGGCTCCATCAGTAGTTACTACTGGAGCTGGATCCGGCAGCCCCCAGGGAAGGGACTGGAGTGGGTTGGGTATCTCTATTACAGTGGGAGCACCAACTACAACCCCTCCCTCAAGAGTCGAGTCACCATATCAGGGGACACGTCCAAGAACCAGTTCTCCCTGAGGCTGAGTTCTGTGACCGCCGCAGACACGGCCGTGTATTACTGTGCGAGAATGCCCAGTTTCGGGGGGTACTACTACGGTATGGACGTCTGGGGCCGAGGG…	IGHV4-59*08	IGHD3-10*01	IGHJ6*02	ARMPSFGGYYYGMDV	15	2.31884	ATGACCTGCTCCCCTCTCCTCCTCACCCTTCTCATTCACTGCACAGGGTCCTGGGCCCAGTCTGTGTTGACGCAGCCGCCCTCAGTGTCTGCGGCCCCAGGACAGAAGGTCACCATCTCCTGCTCTGGAAGCAGCTCCAACATTGGGAGTAATTATGTATCCTGGTACCAGCAGCTCCCAAGAACAGCCCCCAAACTCCTCATTTATGACAATAATAAGCGACCCTCAGGGATTCCTGACCGATTCTCTGGCTCCAAGTCTGGCACGTCAGCCACCCTGGGCATCACCGGACTCCAGACTGGGGACGAGGCCGATTATTACTGCGGAACATGGGATAGCAGCCTGAGTGCTGGTTGGGTGTTCGGCGGAGGGACCAAGCTGACCGTCCTAGG	LV1-51	LJ3	GTWDSSLSAGWV	12	0.600601
c28949	149812	NN	ATGGAGTTGGGACTGAGCTGGATTTTCCTTTTGACTATTTTAAAAGGTGTCCAGTGTGAAGTGCAACTGGTGGAGTCTGGGGGCGGCTTGGTACAGCCTGGCATGTCCCTGAGACTCTCCTGTGCAGCCTCTGGACTCACCTTTGATGATTATGCCATGCACTGGGTCCGCCAAGTTCCAGGGAAGGGCCTGGAGTGGGTCTCAGGTATTAGTTGGAATAGTGGTAACATAGGCTACGCGGACGCTGTGAAGGGCCGATTCACCATCTCCAGAGACAACGCCAAGAGATCCCTGTATCTGCAAATGAACAGTCTGAGAACTGAGGACACGGCCTTGTATTACTGTGCAAAAGATACTGCTATGGGCACTTCTGGTGGTGTACCCTATGTCCTTGACTAC…	IGHV3-9*01	IGHD2-8*02	IGHJ4*02	AKDTAMGTSGGVPYVLDY	18	4.12979	ATGGCCTGGGCTCTGCTGCTCCTCACCCTCCTCACTCAGGGCACAGGGTCCTGGGCCCAGTCTGCCCTGGCTCAGCCTGCCTCCGTGTCTGGGTCTCCTGGACAGTCGATCACCATCTCCTGTTCTGGAACCAGCAGTGACGTTGGTGGTTATAATTATGTCTCCTGGTACCAACAGCACCCAGGCAAAGCCCCCAAACTCCTGATTTATGAGATCACTAATCGGCCCTCAGGGGTTTCTAATCGCTTCTCTGGCTCCAAGTCTGGCAACACGGCCTCCCTGACCATCTCTGGGCTCCAGACTGAGGACGAGGCTGATTATTTCTGCAGCTCATATACAAGCAGCAACACCCCCCTTCATGCCTTCGGAACTGGGACCAAGGTCACCGTCCTAGG	LV2-14	LJ1	SSYTSSNTPLHA	12	3.08642
c28914	149812	NN	ATGGAGTTGGGACTGAACTGGATTTTCCTTTTGGCTATTTTAAAAGGTGTCCAGTGTGAAGTGCAGCTGGTGGAGTCTGGGGGAGGCTTGGTACAGCCTGGCAGGTCCCTGAGACTCTCCTGTGCAGCCTCTGGATTCAGTTTTGATGATCATGCCATGCACTGGGTCCGGCAGGTTCCAGGGAAGGGCCTGGAGTGGGTCTCAGGTATTAGTTGGAACAGTGGTAAAATAGGCTATGCGGACTCTGTGAAGGGCCGATTCACCATCTCCAGAGACAACGCCAAGAACTCCCTCTATCTGCAGATGAACAGTCTGAGAGCTGAGGACACGGCCTTGTATTACTGTGTAAAAGAAATAGAAAAATATTATTCTCAAACAACTTACTACTACTACTACGGT…	IGHV3-9*01	IGHD1/OR15-1a*01	IGHJ6*02	VKEIEKYYSQTTYYYYYGMDV	21	3.36134	ATGGAAACCCCAGCGCAGCTTCTCTTCCTCCTGCTACTCTGGCTCCCAGATACCACCGGAGAAATTGTGTTGGCGCAGTCTCCAGGCACCCTGTCTTTGTCTCCAGGGGAAAGAGCCTCCCTCTCCTGCAGGGCCAGTCAGAGTGTTACCAACACCTTCTTAGCCTGGTACCAGCAGAAACCTGGCCAGGCTCCCAGGCTCCTCATCTATGGTGCATCCAGCAGGGCCACTGGCATCCCAGACAGGTTCAGTGGCAGTGGGTCTGGGACAGACTTCACTCTCACCATCAGCAGACTGGAGCCTGAAGATTTTGCAGTGTATTTCTGTCAGCAGTATGGTAGCTCACCTCTCACTTTCGGCGGAGGGACCAAGGTGGAGATCAAACG	KV3-20	KJ4	QQYGSSPLT	9	2.16049
c29098	149812	NN	ATGGAGTTGGGACTGAACTGGATTTTCCTTTTGGCTATTTTAAAAGGTGTCCAGTGTGAAGTGCAGCTGGTGGAGTCTGGGGGAGGCTTGGTACAGCCTGGCAGGTCCCTGAGACTCTCCTGTGCAGCCTCTGGATTCAGTTTTGATGATCATGCCATGCACTGGGTCCGGCAGGTTCCAGGGAAGGGCCTGGAGTGGGTCTCAGGTATTAGTTGGAACAGTGGTAAAATAGGCTATGCGGACTCTGTGAAGGGCCGATTCACCATCTCCAGAGACAACGCCAAGAACTCCCTCTATCTGCAGATGAACAGTCTGAGAGCTGAGGACACGGCCTTGTATTACTGTGTAAAAGAAATAGAAAAATATTATTCTCAAACAACTTACTACTACTACTACGGT…	IGHV3-9*01	IGHD1/OR15-1a*01	IGHJ6*02	VKEIEKYYSQTTYYYYYGMDV	21	3.36134	ATGGAAACCCCAGCGCAGCTTCTCTTCCTCCTGCTACTCTGGCTCCCAGATACCACCGGAGAAATTGTGTTGGCGCAGTCTCCAGGCACCCTGTCTTTGTCTCCAGGGGAAAGAGCCTCCCTCTCCTGCAGGGCCAGTCAGAGTGTTACCAACACCTTCTTAGCCTGGTACCAGCAGAAACCTGGCCAGGCTCCCAGGCTCCTCATCTATGGTGCATCCAGCAGGGCCACTGGCATCCCAGACAGGTTCAGTGGCAGTGGGTCTGGGACAGACTTCACTCTCACCATCAGCAGACTGGAGCCTGAAGATTTTGCAGTGTATTTCTGTCAGCAGTATGGTAGCTCACCTCTCACTTTCGGCGGAGGGACCAAGGTGGAGATCAAACG	KV3-20	KJ4	QQYGSSPLT	9	2.16049
c29230	149812	NN	ATGGAGTTGGGACTGAACTGGATTTTCCTTTTGGCTATTTTAAAAGGTGTCCAGTGTGAAGTGCAGCTGGTGGAGTCTGGGGGAGGCTTGGTACAGCCTGGCAGGTCCCTGAGACTCTCCTGTGCAGCCTCTGGATTCAGTTTTGATGATCATGCCATGCACTGGGTCCGGCAGGTTCCAGGGAAGGGCCTGGAGTGGGTCTCAGGTATTAGTTGGAACAGTGGTAAAATAGGCTATGCGGACTCTGTGAAGGGCCGATTCACCATCTCCAGAGACAACGCCAAGAACTCCCTCTATCTGCAGATGAACAGTCTGAGAGCTGAGGACACGGCCTTGTATTACTGTGTAAAAGAAATAGAAAAATATTATTCTCAAACAACTTACTACTACTACTACGGT…	IGHV3-9*01	IGHD1/OR15-1a*01	IGHJ6*02	VKEIEKYYSQTTYYYYYGMDV	21	3.36134	ATGGAAACCCCAGCGCAGCTTCTCTTCCTCCTGCTACTCTGGCTCCCAGATACCACCGGAGAAATTGTGTTGGCGCAGTCTCCAGGCACCCTGTCTTTGTCTCCAGGGGAAAGAGCCTCCCTCTCCTGCAGGGCCAGTCAGAGTGTTACCAACACCTTCTTAGCCTGGTACCAGCAGAAACCTGGCCAGGCTCCCAGGCTCCTCATCTATGGTGCATCCAGCAGGGCCACTGGCATCCCAGACAGGTTCAGTGGCAGTGGGTCTGGGACAGACTTCACTCTCACCATCAGCAGACTGGAGCCTGAAGATTTTGCAGTGTATTTCTGTCAGCAGTATGGTAGCTCACCTCTCACTTTCGGCGGAGGGACCAAGGTGGAGATCAAACG	KV3-20	KJ4	QQYGSSPLT	9	2.16049
c28649	149812	NN	ATGGAGTTGGGACTGAACTGGATTTTCCTTTTGGCTATTTTAAAAGGTGTCCAGTGTGAAGTGCAGCTGGTGGAGTCTGGGGGAGGCTTGGTACAGCCTGGCAGGTCCCTGAGACTCTCCTGTGCAGCCTCTGGATTCAGTTTTGATGATCATGCCATGCACTGGGTCCGGCAGGTTCCAGGGAAGGGCCTGGAGTGGGTCTCAGGTATTAGTTGGAACAGTGGTAAAATAGGCTATGCGGACTCTGTGAAGGGCCGATTCACCATCTCCAGAGACAACGCCAAGAACTCCCTCTATCTGCAGATGAACAGTCTGAGAGCTGAGGACACGGCCTTGTATTACTGTGTAAAAGAAATAGAAAAATATTATTCTCAAACAACTTACTACTACTACTACGGT…	IGHV3-9*01	IGHD1/OR15-1a*01	IGHJ6*02	VKEIEKYYSQTTYYYYYGMDV	21	3.36134	ATGGAAACCCCAGCGCAGCTTCTCTTCCTCCTGCTACTCTGGCTCCCAGATACCACCGGAGAAATTGTGTTGGCGCAGTCTCCAGGCACCCTGTCTTTGTCTCCAGGGGAAAGAGCCTCCCTCTCCTGCAGGGCCAGTCAGAGTGTTACCAACACCTTCTTAGCCTGGTACCAGCAGAAACCTGGCCAGGCTCCCAGGCTCCTCATCTATGGTGCATCCAGCAGGGCCACTGGCATCCCAGACAGGTTCAGTGGCAGTGGGTCTGGGACAGACTTCACTCTCACCATCAGCAGACTGGAGCCTGAAGATTTTGCAGTGTATTTCTGTCAGCAGTATGGTAGCTCACCTCTCACTTTCGGCGGAGGGACCAAGGTGGAGATCAAACG	KV3-20	KJ4	QQYGSSPLT	9	2.16049
c29175	149812	NN	ATGGAACTGGGGCTCCGCTGGGTTTTCCTTGTTGCTATTTTAGAAGGTGTCCAGTGTGAGGTGCAGCTGGTGGAGTCTGGGGGAGGCCTGGTCAAGCCTGGGGGGTCCCTGAGACTCTCCTGTGTAGCCTCTGGATTCACCTTCAGTAGTTATAGCATGAACTGGGTCCGCCAGGCTCCAGGGAAGGGGCTGGAGTGGGTCTCATGTATTAGTAGTAGGGATAGTTACATATATTACGGAGACTCAGTGAAGGGCCGATTCACCATCTCCAGAGACAACGCCAAGAACTCACTGTATCTACAAATGAACAGCCTGAGAGCCGAGGACACGGCTGTGTATTACTGTGCGAGAGGCGGAGGATATAGGGGCTACGACTACCACTACTACGCTATGGACGTC…	IGHV3-21*01	IGHD5-12*01	IGHJ6*02	ARGGGYRGYDYHYYAMDV	18	3.38983	ATGGACATGAGGGTCCCCGCTCAGCTCCTGGGGCTCCTGCTGCTCTGGCTCCCAGGTGCCAAATGTGACATCCAGATGACCCAGTCTCCTTCCACCCTGTCTACATCTGTAGGAGACAGAGTCACCATCACTTGCCGGGCCAGTCAGAGTATTAGTAGCTGGTTGGCCTGGTATCAGCAGAAACCAGGGAAAGCCCCTAAGCTCCTGATCTATAAGGCGTCTAGTTTAGCAACTGGGGTCCCATCGAGGTTCAGCGGCAGTGGATCTGGGACAGAATTCACTCTCACCATCAGCAGCCTGCAGCCTGATGATTTTGCAACTTATTACTGCCAACAGTATAATAGTTATTCCTGGACGTTCGGCCAAGGGACCAAGGTGGAAATCAAACG	KV1-5	KJ1	QQYNSYSWT	9	1.25
c29233	149812	NN	ATGGAACTGGGGCTCCGCTGGGTTTTCCTTGTTGCTATTTTAGAAGGTGTCCAGTGTGAGGTGCAGCTGGTGGAGTCTGGGGGAGGCCTGGTCAAGCCTGGGGGGTCCCTGAGACTCTCCTGTGTAGCCTCTGGATTCACCTTCAGTAGTTATAGCATGAACTGGGTCCGCCAGGCTCCAGGGAAGGGGCTGGAGTGGGTCTCATGTATTAGTAGTAGGGATAGTTACATATATTACGGAGACTCAGTGAAGGGCCGATTCACCATCTCCAGAGACAACGCCAAGAACTCACTGTATCTACAAATGAACAGCCTGAGAGCCGAGGACACGGCTGTGTATTACTGTGCGAGAGGCGGAGGATATAGGGGCTACGACTACCACTACTACGCTATGGACGTC…	IGHV3-21*01	IGHD5-12*01	IGHJ6*02	ARGGGYRGYDYHYYAMDV	18	3.38983	ATGGACATGAGGGTCCCCGCTCAGCTCCTGGGGCTCCTGCTGCTCTGGCTCCCAGGTGCCAAATGTGACATCCAGATGACCCAGTCTCCTTCCACCCTGTCTACATCTGTAGGAGACAGAGTCACCATCACTTGCCGGGCCAGTCAGAGTATTAGTAGCTGGTTGGCCTGGTATCAGCAGAAACCAGGGAAAGCCCCTAAGCTCCTGATCTATAAGGCGTCTAGTTTAGCAACTGGGGTCCCATCGAGGTTCAGCGGCAGTGGATCTGGGACAGAATTCACTCTCACCATCAGCAGCCTGCAGCCTGATGATTTTGCAACTTATTACTGCCAACAGTATAATAGTTATTCCTGGACGTTCGGCCAAGGGACCAAGGTGGAAATCAAACG	KV1-5	KJ1	QQYNSYSWT	9	1.25
c29150	149812	NN	ATGGAATTGGGGCTGAGCTGGGTTTTCCTTGTTGCTATTTTAGAAGGTGTCCAGTGTGAGGGGGAACTGGTGCAATCTGGGGGAGGCTTGATCCAGCCTGGGGGGACCCTGAGACTCTCCTGTGCAGCCTCTGGATTCACCTTCGGCAATTTCTGGATGGCCTGGGTCCGCCAGGCTCCGGGGAAGGGACTGGAGTGGGTGGCCAACATAAAGCATGACGGAAGTGAAAACTCCTATGTGGACTCTGTGAAGGGCCGATTCACCATCTCCAGAGACAACGCCAAGAATTCAGTGTATCTGCAACTGAGCAACCTGAGAAACGACGACACGGCTGTTTATTATTGTGCGAGAGGTGTTGGGAGCCGCCCGTGGTATTTTGACTATTGGGGCCAGGGATCC…	IGHV3-7*01	IGHD1-26*01	IGHJ4*02	ARGVGSRPWYFDY	13	10.6825	ATGGACATGAGGGTCCCCGCTCAGCTCCTGGGGCTCCTGCTACTCTGGCTCCGAGGTGCCAGATGTGACATCCAGATGACCCAGTCTCCATTCTCCGTGTCTGCATCTGTCGGAGACAGGGTCTCCATCTCTTGCCGGGCAAGTCAGAGTGTCAGCAGTTATTTGAATTGGTATCAGCAGAAACCAGGGAAAGCCCCTAAGCTCCTCATCACTGCAATATTCACTTTGCAAAGTGGGGTCCCTTCAAGGTTCAGTGGCAGTGGATCTGGGACAGAGTTCACTCTCACCATTACTGGTGTGCAGGTTGAAGATTTTGCAACTTACTACTGTCAACAGAGTTACTTCACCCCTCTCACTTTCGGCGGAGGGACCAGGGTGGAGATGAAACG	KV1-39	KJ4	QQSYFTPLT	9	10.5919
c29232	149812	NN	ATGGAATTGGGGCTGAGCTGGGTTTTCCTTGTTGCTATTTTAGAAGGTGTCCAGTGTGAGGGGGAACTGGTGCAATCTGGGGGAGGCTTGATCCAGCCTGGGGGGACCCTGAGACTCTCCTGTGCAGCCTCTGGATTCACCTTCGGCAATTTCTGGATGGCCTGGGTCCGCCAGGCTCCGGGGAAGGGACTGGAGTGGGTGGCCAACATAAAGCATGACGGAAGTGAAAACTCCTATGTGGACTCTGTGAAGGGCCGATTCACCATCTCCAGAGACAACGCCAAGAATTCAGTGTATCTGCAACTGAGCAACCTGAGAAACGACGACACGGCTGTTTATTATTGTGCGAGAGGTGTTGGGAGCCGCCCGTGGTATTTTGACTATTGGGGCCAGGGATCC…	IGHV3-7*01	IGHD1-26*01	IGHJ4*02	ARGVGSRPWYFDY	13	10.6825	ATGGACATGAGGGTCCCCGCTCAGCTCCTGGGGCTCCTGCTACTCTGGCTCCGAGGTGCCAGATGTGACATCCAGATGACCCAGTCTCCATTCTCCGTGTCTGCATCTGTCGGAGACAGGGTCTCCATCTCTTGCCGGGCAAGTCAGAGTGTCAGCAGTTATTTGAATTGGTATCAGCAGAAACCAGGGAAAGCCCCTAAGCTCCTCATCACTGCAATATTCACTTTGCAAAGTGGGGTCCCTTCAAGGTTCAGTGGCAGTGGATCTGGGACAGAGTTCACTCTCACCATTACTGGTGTGCAGGTTGAAGATTTTGCAACTTACTACTGTCAACAGAGTTACTTCACCCCTCTCACTTTCGGCGGAGGGACCAGGGTGGAGATGAAACG	KV1-39	KJ4	QQSYFTPLT	9	10.5919
c28891	149812	NN	ATGGAACTGGGGCTCCGCTGGGTTTTCCTTGTTGCTATTTTAGAAGGTGTCCAGTGTGAGGTGCAACTGGTGGAGTCTGGGGGAGGCCTGGTCAAGCCTGGGGGGTCCCTGAGACTCTCCTGCTCTGTCTCTGGATTCACCTTCAACACCTATACCATGCACTGGGTCCGCCAGGCTCCAGGGAAGGGGCTAGAGTGGGTCTCATCCATTAGTACTAGCAGAAGTTACATATTCTACGCAGACTCAGTGAAGGGCCGATTCACCATCTCCAGAGACAACGCCGAAAACACACTGTATCTGCAGATGAACAGCCTGAGAGTCGACGACACGGCTGTTTATTACTGTGCGAGAGACGACTACGGTGACTACCGCGGTATGGACCTCTGGGGCCTAGGGACC…	IGHV3-21*02	IGHD4-17*01	IGHJ6*02	ARDDYGDYRGMDL	13	6.72515	ATGGACATGAGGGTCCCCGCTCAGCTCCTGGGGCTCCTGCTGCTCTGGCTCCCAGGTGCCAAATGTGACATCCAGATGACCCAGTCTCCTTCCACCCTGTCTGCATCTGTAGGAGACAGAGTCACCATCACTTGCCGGGCCAGTCAGAGTATAAGTAACTGGTTGGCCTGGTATCAGCAGACACCAGGAAAAGCCCCTAAACTCCTGATATATCAGGCGTCTACTTTAGAAGGAGGGGTCCCATCAAGGTTCAGCGGCAGTGGATCTGGGACAGAATTCACTCTCACCATCACCAGCCTGCAGCCTGATGATTTTGCAACTTATTTCTGCCAACAGTATAAAACTAATTCGTACACTTTTGGCCAGGGGACCAAGCTGGAGATCAAACG	KV1-5	KJ2	QQYKTNSYT	9	4.6729
c29228	149812	NN	ATGGAACTGGGGCTCCGCTGGGTTTTCCTTGTTGCTATTTTAGAAGGTGTCCAGTGTGAGGTGCAACTGGTGGAGTCTGGGGGAGGCCTGGTCAAGCCTGGGGGGTCCCTGAGACTCTCCTGCTCTGTCTCTGGATTCACCTTCAACACCTATACCATGCACTGGGTCCGCCAGGCTCCAGGGAAGGGGCTAGAGTGGGTCTCATCCATTAGTACTAGCAGAAGTTACATATTCTACGCAGACTCAGTGAAGGGCCGATTCACCATCTCCAGAGACAACGCCGAAAACACACTGTATCTGCAGATGAACAGCCTGAGAGTCGACGACACGGCTGTTTATTACTGTGCGAGAGACGACTACGGTGACTACCGCGGTATGGACCTCTGGGGCCTAGGGACC…	IGHV3-21*02	IGHD4-17*01	IGHJ6*02	ARDDYGDYRGMDL	13	6.72515	ATGGACATGAGGGTCCCCGCTCAGCTCCTGGGGCTCCTGCTGCTCTGGCTCCCAGGTGCCAAATGTGACATCCAGATGACCCAGTCTCCTTCCACCCTGTCTGCATCTGTAGGAGACAGAGTCACCATCACTTGCCGGGCCAGTCAGAGTATAAGTAACTGGTTGGCCTGGTATCAGCAGACACCAGGAAAAGCCCCTAAACTCCTGATATATCAGGCGTCTACTTTAGAAGGAGGGGTCCCATCAAGGTTCAGCGGCAGTGGATCTGGGACAGAATTCACTCTCACCATCACCAGCCTGCAGCCTGATGATTTTGCAACTTATTTCTGCCAACAGTATAAAACTAATTCGTACACTTTTGGCCAGGGGACCAAGCTGGAGATCAAACG	KV1-5	KJ2	QQYKTNSYT	9	4.6729
c29095	149812	NN	ATGGAGTCTGGGCTGAGCTGGGTTTTCCTCGTTGCTCTTTTAAGAGGTGTCCAGTGTCAGGTGCACCTGGTGGAGTCCGGGGGAGGCGTGGTCCAGCCTGGGAGGTCCCTGAGACTCTCCTGTGTTGCCTCTGGATTCGTCTTCAATACCCATGCCATGCACTGGGTCCGCCAGGCTCCAGGCAAGGGGCTGGAGTGGGTGGCCGTCATCTCATATGATGGAACTAATAAACACTATGCAGACTCCGTGAAGGGCCGCTTCACCATCTCCAGAGACAACTCCAAGAACACACTGTATCTGCAAATGAACAGCCTGACACGTAATGACACGGCTGTCTATTACTGTGCGCGAGGGAAGTGGGCGCAGTGGCTGGTCTCCGACTACTGGGGCCAGGGAACC…	IGHV3-30*03	IGHD6-19*01	IGHJ4*02	ARGKWAQWLVSDY	13	7.85498	ATGGCCTGGACCCCTCTCCTGCTCCCCCTCCTCACTTTCTGCACAGTCTCTGAGGCCTCCTATGCGCTGACACAGCCACCCTCGGTGTCAGTGTCCCCAGGACAAACGGCCAGGATCACCTGCTCTGGAGAAGCATTGACAAAAAAGTATGCTTGTTGGTACCAGCAGAAGTCAGGCCAGGCCCCTGCGCTGGTCATCTATGAGGACACCAAACGACCCTCCGGGATCCCTGAGAGATTCTCTGGCTCCAGCTCAGGGACAATGGCCACCTTGACTATCACTGGGGCCCAGATGGAGGATGAAGCTGACTACTATTGTTACTCAACAGACAGCAGTGATAATCAGGGGGTGTTCGGCGGAGGGACCAAGCTGACCGTCCTGGG	LV3-10	LJ3	YSTDSSDNQGV	11	3.44828
c28739	149812	NN	ATGGAGTCTGGGCTGAGCTGGGTTTTCCTCGTTGCTCTTTTAAGAGGTGTCCAGTGTCAGGTGCACCTGGTGGAGTCCGGGGGAGGCGTGGTCCAGCCTGGGAGGTCCCTGAGACTCTCCTGTGTTGCCTCTGGATTCGTCTTCAATACCCATGCCATGCACTGGGTCCGCCAGGCTCCAGGCAAGGGGCTGGAGTGGGTGGCCGTCATCTCATATGATGGAACTAATAAACACTATGCAGACTCCGTGAAGGGCCGCTTCACCATCTCCAGAGACAACTCCAAGAACACACTGTATCTGCAAATGAACAGCCTGACACGTAATGACACGGCTGTCTATTACTGTGCGCGAGGGAAGTGGGCGCAGTGGCTGGTCTCCGACTACTGGGGCCAGGGAACC…	IGHV3-30*03	IGHD6-19*01	IGHJ4*02	ARGKWAQWLVSDY	13	7.85498	ATGGCCTGGACCCCTCTCCTGCTCCCCCTCCTCACTTTCTGCACAGTCTCTGAGGCCTCCTATGCGCTGACACAGCCACCCTCGGTGTCAGTGTCCCCAGGACAAACGGCCAGGATCACCTGCTCTGGAGAAGCATTGACAAAAAAGTATGCTTGTTGGTACCAGCAGAAGTCAGGCCAGGCCCCTGCGCTGGTCATCTATGAGGACACCAAACGACCCTCCGGGATCCCTGAGAGATTCTCTGGCTCCAGCTCAGGGACAATGGCCACCTTGACTATCACTGGGGCCCAGATGGAGGATGAAGCTGACTACTATTGTTACTCAACAGACAGCAGTGATAATCAGGGGGTGTTCGGCGGAGGGACCAAGCTGACCGTCCTGGG	LV3-10	LJ3	YSTDSSDNQGV	11	3.44828
c28822	149812	NN	ATGGAGTCTGGGCTGAGCTGGGTTTTCCTCGTTGCTCTTTTAAGAGGTGTCCAGTGTCAGGTGCACCTGGTGGAGTCCGGGGGAGGCGTGGTCCAGCCTGGGAGGTCCCTGAGACTCTCCTGTGTTGCCTCTGGATTCGTCTTCAATACCCATGCCATGCACTGGGTCCGCCAGGCTCCAGGCAAGGGGCTGGAGTGGGTGGCCGTCATCTCATATGATGGAACTAATAAACACTATGCAGACTCCGTGAAGGGCCGCTTCACCATCTCCAGAGACAACTCCAAGAACACACTGTATCTGCAAATGAACAGCCTGACACGTAATGACACGGCTGTCTATTACTGTGCGCGAGGGAAGTGGGCGCAGTGGCTGGTCTCCGACTACTGGGGCCAGGGAACC…	IGHV3-30*03	IGHD6-19*01	IGHJ4*02	ARGKWAQWLVSDY	13	7.85498	ATGGCCTGGACCCCTCTCCTGCTCCCCCTCCTCACTTTCTGCACAGTCTCTGAGGCCTCCTATGCGCTGACACAGCCACCCTCGGTGTCAGTGTCCCCAGGACAAACGGCCAGGATCACCTGCTCTGGAGAAGCATTGACAAAAAAGTATGCTTGTTGGTACCAGCAGAAGTCAGGCCAGGCCCCTGCGCTGGTCATCTATGAGGACACCAAACGACCCTCCGGGATCCCTGAGAGATTCTCTGGCTCCAGCTCAGGGACAATGGCCACCTTGACTATCACTGGGGCCCAGATGGAGGATGAAGCTGACTACTATTGTTACTCAACAGACAGCAGTGATAATCAGGGGGTGTTCGGCGGAGGGACCAAGCTGACCGTCCTGGG	LV3-10	LJ3	YSTDSSDNQGV	11	3.44828
c29024	149812	NN	ATGGAGTCTGGGCTGAGCTGGGTTTTCCTCGTTGCTCTTTTAAGAGGTGTCCAGTGTCAGGTGCACCTGGTGGAGTCCGGGGGAGGCGTGGTCCAGCCTGGGAGGTCCCTGAGACTCTCCTGTGTTGCCTCTGGATTCGTCTTCAATACCCATGCCATGCACTGGGTCCGCCAGGCTCCAGGCAAGGGGCTGGAGTGGGTGGCCGTCATCTCATATGATGGAACTAATAAACACTATGCAGACTCCGTGAAGGGCCGCTTCACCATCTCCAGAGACAACTCCAAGAACACACTGTATCTGCAAATGAACAGCCTGACACGTAATGACACGGCTGTCTATTACTGTGCGCGAGGGAAGTGGGCGCAGTGGCTGGTCTCCGACTACTGGGGCCAGGGAACC…	IGHV3-30*03	IGHD6-19*01	IGHJ4*02	ARGKWAQWLVSDY	13	7.85498	ATGGCCTGGACCCCTCTCCTGCTCCCCCTCCTCACTTTCTGCACAGTCTCTGAGGCCTCCTATGCGCTGACACAGCCACCCTCGGTGTCAGTGTCCCCAGGACAAACGGCCAGGATCACCTGCTCTGGAGAAGCATTGACAAAAAAGTATGCTTGTTGGTACCAGCAGAAGTCAGGCCAGGCCCCTGCGCTGGTCATCTATGAGGACACCAAACGACCCTCCGGGATCCCTGAGAGATTCTCTGGCTCCAGCTCAGGGACAATGGCCACCTTGACTATCACTGGGGCCCAGATGGAGGATGAAGCTGACTACTATTGTTACTCAACAGACAGCAGTGATAATCAGGGGGTGTTCGGCGGAGGGACCAAGCTGACCGTCCTGGG	LV3-10	LJ3	YSTDSSDNQGV	11	3.44828
c29042	149812	NN	ATGGGGTCAACCGCCATCCTCGCCCTCCTCCTGGCTGTTCTCCAAGGAGTCTGTGCCGAGGTGCAGCTGGTGCAGTCTGGAGCAGAGGTGAAAAAGCCCGGGGAGTCTCTGAAGATCTCCTGTAAGGGTTCTGGAGACAGCTTTATCAACTACTGGATCGGCTGGGTGCGCCAGATGCCCGGGAAAGGCCTGGAGTACATGGGGATCATCTATCCTGGTGACTCTGATACCAGATACAGCCCGTCCTTCCGAGGCCAGGTCACCATCTCAGCCGACAAGTCCATCAGCACCGCCTACCTGCAGTGGAGCAGCCTGAAGGCCTCGGACACCGCCATGTATTACTGTGCGAGGATCGGTGTCCCGGGGCATATAGCAGTGGCTGATTACTACTTTGACTCC…	IGHV5-51*01	IGHD6-19*01	IGHJ4*02	ARIGVPGHIAVADYYFDS	18	1.76471	ATGGCCTGGGCTCTGCTATTCCTCACCCTCCTCACTCAGGGCACAGGGTCCTGGGCCCAGTCTGCCCTGACTCAGCCTGCCTCCGTGTCTGGGTCTCCTGGACAGTCGATCACCATCTCCTGCACTGGAACCAGCAGTGACGTTGGTGGTTATAACTATGTCTCCTGGTACCAACAACACCCAGGCAAAGCCCCCAAACTCATGATTTATGATGTCAGTAATCGGCCCTCAGGGGTTTCTAATCGCTTCTCTGGCTCCAAGTCTGGCAACACGGCCTCCCTGACCATCTCTGGGCTCCAGGCTGAGGACGAGGCTGATTATTACTGCAGCTCATATTCAAGCAGCAGCACTCTCGTGGTATTCGGCGGAGGGACCAAACTGACCGTCCTAGG	LV2-14	LJ2	SSYSSSSTLVV	11	1.2012
c28835	149812	NN	ATGGGGTCAACCGCCATCCTCGCCCTCCTCCTGGCTGTTCTCCAAGGAGTCTGTGCCGAGGTGCAGCTGGTGCAGTCTGGAGCAGAGGTGAAAAAGCCCGGGGAGTCTCTGAAGATCTCCTGTAAGGGTTCTGGAGACAGCTTTATCAACTACTGGATCGGCTGGGTGCGCCAGATGCCCGGGAAAGGCCTGGAGTACATGGGGATCATCTATCCTGGTGACTCTGATACCAGATACAGCCCGTCCTTCCGAGGCCAGGTCACCATCTCAGCCGACAAGTCCATCAGCACCGCCTACCTGCAGTGGAGCAGCCTGAAGGCCTCGGACACCGCCATGTATTACTGTGCGAGGATCGGTGTCCCGGGGCATATAGCAGTGGCTGATTACTACTTTGACTCC…	IGHV5-51*01	IGHD6-19*01	IGHJ4*02	ARIGVPGHIAVADYYFDS	18	1.76471	ATGGCCTGGGCTCTGCTATTCCTCACCCTCCTCACTCAGGGCACAGGGTCCTGGGCCCAGTCTGCCCTGACTCAGCCTGCCTCCGTGTCTGGGTCTCCTGGACAGTCGATCACCATCTCCTGCACTGGAACCAGCAGTGACGTTGGTGGTTATAACTATGTCTCCTGGTACCAACAACACCCAGGCAAAGCCCCCAAACTCATGATTTATGATGTCAGTAATCGGCCCTCAGGGGTTTCTAATCGCTTCTCTGGCTCCAAGTCTGGCAACACGGCCTCCCTGACCATCTCTGGGCTCCAGGCTGAGGACGAGGCTGATTATTACTGCAGCTCATATTCAAGCAGCAGCACTCTCGTGGTATTCGGCGGAGGGACCAAACTGACCGTCCTAGG	LV2-14	LJ2	SSYSSSSTLVV	11	1.2012
c29105	149812	NN	ATGGGGTCAACCGCCATCCTCGCCCTCCTCCTGGCTGTTCTCCAAGGAGTCTGTGCCGAGGTGCAGCTGGTGCAGTCTGGAGCAGAGGTGAAAAAGCCCGGGGAGTCTCTGAAGATCTCCTGTAAGGGTTCTGGAGACAGCTTTATCAACTACTGGATCGGCTGGGTGCGCCAGATGCCCGGGAAAGGCCTGGAGTACATGGGGATCATCTATCCTGGTGACTCTGATACCAGATACAGCCCGTCCTTCCGAGGCCAGGTCACCATCTCAGCCGACAAGTCCATCAGCACCGCCTACCTGCAGTGGAGCAGCCTGAAGGCCTCGGACACCGCCATGTATTACTGTGCGAGGATCGGTGTCCCGGGGCATATAGCAGTGGCTGATTACTACTTTGACTCC…	IGHV5-51*01	IGHD6-19*01	IGHJ4*02	ARIGVPGHIAVADYYFDS	18	1.76471	ATGGCCTGGGCTCTGCTATTCCTCACCCTCCTCACTCAGGGCACAGGGTCCTGGGCCCAGTCTGCCCTGACTCAGCCTGCCTCCGTGTCTGGGTCTCCTGGACAGTCGATCACCATCTCCTGCACTGGAACCAGCAGTGACGTTGGTGGTTATAACTATGTCTCCTGGTACCAACAACACCCAGGCAAAGCCCCCAAACTCATGATTTATGATGTCAGTAATCGGCCCTCAGGGGTTTCTAATCGCTTCTCTGGCTCCAAGTCTGGCAACACGGCCTCCCTGACCATCTCTGGGCTCCAGGCTGAGGACGAGGCTGATTATTACTGCAGCTCATATTCAAGCAGCAGCACTCTCGTGGTATTCGGCGGAGGGACCAAACTGACCGTCCTAGG	LV2-14	LJ2	SSYSSSSTLVV	11	1.2012
c28656	149812	NN	ATGGGGTCAACCGCCATCCTCGCCCTCCTCCTGGCTGTTCTCCAAGGAGTCTGTGCCGAGGTGCAGCTGGTGCAGTCTGGAGCAGAGGTGAAAAAGCCCGGGGAGTCTCTGAAGATCTCCTGTAAGGGTTCTGGAGACAGCTTTATCAACTACTGGATCGGCTGGGTGCGCCAGATGCCCGGGAAAGGCCTGGAGTACATGGGGATCATCTATCCTGGTGACTCTGATACCAGATACAGCCCGTCCTTCCGAGGCCAGGTCACCATCTCAGCCGACAAGTCCATCAGCACCGCCTACCTGCAGTGGAGCAGCCTGAAGGCCTCGGACACCGCCATGTATTACTGTGCGAGGATCGGTGTCCCGGGGCATATAGCAGTGGCTGATTACTACTTTGACTCC…	IGHV5-51*01	IGHD6-19*01	IGHJ4*02	ARIGVPGHIAVADYYFDS	18	1.76471	ATGGCCTGGGCTCTGCTATTCCTCACCCTCCTCACTCAGGGCACAGGGTCCTGGGCCCAGTCTGCCCTGACTCAGCCTGCCTCCGTGTCTGGGTCTCCTGGACAGTCGATCACCATCTCCTGCACTGGAACCAGCAGTGACGTTGGTGGTTATAACTATGTCTCCTGGTACCAACAACACCCAGGCAAAGCCCCCAAACTCATGATTTATGATGTCAGTAATCGGCCCTCAGGGGTTTCTAATCGCTTCTCTGGCTCCAAGTCTGGCAACACGGCCTCCCTGACCATCTCTGGGCTCCAGGCTGAGGACGAGGCTGATTATTACTGCAGCTCATATTCAAGCAGCAGCACTCTCGTGGTATTCGGCGGAGGGACCAAACTGACCGTCCTAGG	LV2-14	LJ2	SSYSSSSTLVV	11	1.2012
c29130	149812	NN	ATGGGGTCAACCGCCATCCTCGCCCTCCTCCTGGCTGTTCTCCAAGGAGTCTGTGCCGAGGTGCAGCTGGTGCAGTCTGGAGCAGAGGTGAAAAAGCCCGGGGAGTCTCTGAAGATCTCCTGTAAGGGTTCTGGAGACAGCTTTATCAACTACTGGATCGGCTGGGTGCGCCAGATGCCCGGGAAAGGCCTGGAGTACATGGGGATCATCTATCCTGGTGACTCTGATACCAGATACAGCCCGTCCTTCCGAGGCCAGGTCACCATCTCAGCCGACAAGTCCATCAGCACCGCCTACCTGCAGTGGAGCAGCCTGAAGGCCTCGGACACCGCCATGTATTACTGTGCGAGGATCGGTGTCCCGGGGCATATAGCAGTGGCTGATTACTACTTTGACTCC…	IGHV5-51*01	IGHD6-19*01	IGHJ4*02	ARIGVPGHIAVADYYFDS	18	1.76471	ATGGCCTGGGCTCTGCTATTCCTCACCCTCCTCACTCAGGGCACAGGGTCCTGGGCCCAGTCTGCCCTGACTCAGCCTGCCTCCGTGTCTGGGTCTCCTGGACAGTCGATCACCATCTCCTGCACTGGAACCAGCAGTGACGTTGGTGGTTATAACTATGTCTCCTGGTACCAACAACACCCAGGCAAAGCCCCCAAACTCATGATTTATGATGTCAGTAATCGGCCCTCAGGGGTTTCTAATCGCTTCTCTGGCTCCAAGTCTGGCAACACGGCCTCCCTGACCATCTCTGGGCTCCAGGCTGAGGACGAGGCTGATTATTACTGCAGCTCATATTCAAGCAGCAGCACTCTCGTGGTATTCGGCGGAGGGACCAAACTGACCGTCCTAGG	LV2-14	LJ2	SSYSSSSTLVV	11	1.2012
c29241	149812	NN	ATGGGGTCAACCGCCATCCTCGCCCTCCTCCTGGCTGTTCTCCAAGGAGTCTGTGCCGAGGTGCAGCTGGTGCAGTCTGGAGCAGAGGTGAAAAAGCCCGGGGAGTCTCTGAAGATCTCCTGTAAGGGTTCTGGAGACAGCTTTATCAACTACTGGATCGGCTGGGTGCGCCAGATGCCCGGGAAAGGCCTGGAGTACATGGGGATCATCTATCCTGGTGACTCTGATACCAGATACAGCCCGTCCTTCCGAGGCCAGGTCACCATCTCAGCCGACAAGTCCATCAGCACCGCCTACCTGCAGTGGAGCAGCCTGAAGGCCTCGGACACCGCCATGTATTACTGTGCGAGGATCGGTGTCCCGGGGCATATAGCAGTGGCTGATTACTACTTTGACTCC…	IGHV5-51*01	IGHD6-19*01	IGHJ4*02	ARIGVPGHIAVADYYFDS	18	1.76471	ATGGCCTGGGCTCTGCTATTCCTCACCCTCCTCACTCAGGGCACAGGGTCCTGGGCCCAGTCTGCCCTGACTCAGCCTGCCTCCGTGTCTGGGTCTCCTGGACAGTCGATCACCATCTCCTGCACTGGAACCAGCAGTGACGTTGGTGGTTATAACTATGTCTCCTGGTACCAACAACACCCAGGCAAAGCCCCCAAACTCATGATTTATGATGTCAGTAATCGGCCCTCAGGGGTTTCTAATCGCTTCTCTGGCTCCAAGTCTGGCAACACGGCCTCCCTGACCATCTCTGGGCTCCAGGCTGAGGACGAGGCTGATTATTACTGCAGCTCATATTCAAGCAGCAGCACTCTCGTGGTATTCGGCGGAGGGACCAAACTGACCGTCCTAGG	LV2-14	LJ2	SSYSSSSTLVV	11	1.2012
c28892	149812	NN	ATGGGGTCAACCGCCATCCTCGCCCTCCTCCTGGCTGTTCTCCAAGGAGTCTGTGCCGAGGTGCAGCTGGTGCAGTCTGGAGCAGAGGTGAAAAAGCCCGGGGAGTCTCTGAAGATCTCCTGTAAGGGTTCTGGAGACAGCTTTATCAACTACTGGATCGGCTGGGTGCGCCAGATGCCCGGGAAAGGCCTGGAGTACATGGGGATCATCTATCCTGGTGACTCTGATACCAGATACAGCCCGTCCTTCCGAGGCCAGGTCACCATCTCAGCCGACAAGTCCATCAGCACCGCCTACCTGCAGTGGAGCAGCCTGAAGGCCTCGGACACCGCCATGTATTACTGTGCGAGGATCGGTGTCCCGGGGCATATAGCAGTGGCTGATTACTACTTTGACTCC…	IGHV5-51*01	IGHD6-19*01	IGHJ4*02	ARIGVPGHIAVADYYFDS	18	1.76471	ATGGCCTGGGCTCTGCTATTCCTCACCCTCCTCACTCAGGGCACAGGGTCCTGGGCCCAGTCTGCCCTGACTCAGCCTGCCTCCGTGTCTGGGTCTCCTGGACAGTCGATCACCATCTCCTGCACTGGAACCAGCAGTGACGTTGGTGGTTATAACTATGTCTCCTGGTACCAACAACACCCAGGCAAAGCCCCCAAACTCATGATTTATGATGTCAGTAATCGGCCCTCAGGGGTTTCTAATCGCTTCTCTGGCTCCAAGTCTGGCAACACGGCCTCCCTGACCATCTCTGGGCTCCAGGCTGAGGACGAGGCTGATTATTACTGCAGCTCATATTCAAGCAGCAGCACTCTCGTGGTATTCGGCGGAGGGACCAAACTGACCGTCCTAGG	LV2-14	LJ2	SSYSSSSTLVV	11	1.2012
c28966	149812	NN	ATGGGGTCAACCGCCATCCTCGCCCTCCTCCTGGCTGTTCTCCAAGGAGTCTGTGCCGAGGTGCAGCTGGTGCAGTCTGGAGCAGAGGTGAAAAAGCCCGGGGAGTCTCTGAAGATCTCCTGTAAGGGTTCTGGAGACAGTTTTATCAACTACTGGATCGGCTGGGTGCGCCAGATGCCCGGGAAAGGCCTGGAGTACATGGGGATCATCTATCCTGGTGACTCTGATACCAGATACAGCCCGTCCTTCCGAGGCCAGGTCACCATCTCAGCCGACAAGTCCATCAGCACCGCCTACCTGCAGTGGAGCAGCCTGAAGGCCTCGGACACCGCCATGTATTACTGTGCGAGGATCGGTGTCCCGGGGCATATAGCAGTGGCTGATTACTACTTTGACTCC…	IGHV5-51*01	IGHD6-19*01	IGHJ4*02	ARIGVPGHIAVADYYFDS	18	2.05882	ATGGCCTGGGCTCTGCTATTCCTCACCCTCCTCACTCAGGGCACAGGGTCCTGGGCCCAGTCTGCCCTGACTCAGCCTGCCTCCGTGTCTGGGTCTCCTGGACAGTCGATCACCATCTCCTGCACTGGAACCAGCAGTGACGTTGGTGGTTATAACTATGTCTCCTGGTACCAACAACACCCAGGCAAAGCCCCCAAACTCATGATTTATGATGTCAGTAATCGGCCCTCAGGGGTTTCTAATCGCTTCTCTGGCTCCAAGTCTGGCAACACGGCCTCCCTGACCATCTCTGGGCTCCAGGCTGAGGACGAGGCTGATTATTACTGCAGCTCATATTCAAGCAGCAGCACTCTCGTGGTATTCGGCGGAGGGACCAAACTGACCGTCCTAGG	LV2-14	LJ2	SSYSSSSTLVV	11	1.2012
c29076	149812	NN	ATGGGGTCAACCGCCATCCTCGCCCTCCTCCTGGCTGTTCTCCAAGGAGTCTGTGCCGAGGTGCAGCTGGTGCAGTCTGGAGCAGAGGTGAAAAAGCCCGGGGAGTCTCTGAAGATCTCCTGTAAGGGTTCTGGAGACAGCTTTATCAACTACTGGATCGGCTGGGTGCGCCAGATGCCCGGGAAAGGCCTGGAGTACATGGGGATCATCTATCCTGGTGACTCTGATACCAGATACAGCCCGTCCTTCCGAGGCCAGGTCACCATCTCAGCCGACAAGTCCATCAGCACCGCCTACCTGCAGTGGAGCAGCCTGAAGGCCTCGGACACCGCCATGTATTACTGTGCGAGGATCGGTGTCCCGGGGCATATAGCAGTGGCTGATTACTACTTTGACTCC…	IGHV5-51*01	IGHD6-19*01	IGHJ4*02	ARIGVPGHIAVADYYFDS	18	1.76471	ATGGCCTGGGCTCTGCTATTCCTCACCCTCCTCACTCAGGGCACAGGGTCCTGGGCCCAGTCTGCCCTGACTCAGCCTGCCTCCGTGTCTGGGTCTCCTGGACAGTCGATCACCATCTCCTGCACTGGAACCAGCAGTGACGTTGGTGGTTATAACTATGTCTCCTGGTACCAACAACACCCAGGCAAAGCCCCCAAACTCATGATTTATGATGTCAGTAATCGGCCCTCAGGGGTTTCTAATCGCTTCTCTGGCTCCAAGTCTGGCAACACGGCCTCCCTGACCATCTCTGGGCTCCAGGCTGAGGACGAGGCTGATTATTACTGCAGCTCATATTCAAGCAGCAGCACTCTCGTGGTATTCGGCGGAGGGACCAAACTGACCGTCCTAGG	LV2-14	LJ2	SSYSSSSTLVV	11	1.2012
c28755	149812	NN	ATGGGGTCAACCGCCATCCTCGCCCTCCTCCTGGCTGTTCTCCAAGGAGTCTGTGCCGAGGTGCAGCTGGTGCAGTCTGGAGCAGAGGTGAAAAAGCCCGGGGAGTCTCTGAAGATCTCCTGTAAGGGTTCTGGAGACAGCTTTATCAACTACTGGATCGGCTGGGTGCGCCAGATGCCCGGGAAAGGCCTGGAGTACATGGGGATCATCTATCCTGGTGACTCTGATACCAGATACAGCCCGTCCTTCCGAGGCCAGGTCACCATCTCAGCCGACAAGTCCATCAGCACCGCCTACCTGCAGTGGAGCAGCCTGAAGGCCTCGGACACCGCCATGTATTACTGTGCGAGGATCGGTGTCCCGGGGCATATAGCAGTGGCTGATTACTACTTTGACTCC…	IGHV5-51*01	IGHD6-19*01	IGHJ4*02	ARIGVPGHIAVADYYFDS	18	1.76471	ATGGCCTGGGCTCTGCTATTCCTCACCCTCCTCACTCAGGGCACAGGGTCCTGGGCCCAGTCTGCCCTGACTCAGCCTGCCTCCGTGTCTGGGTCTCCTGGACAGTCGATCACCATCTCCTGCACTGGAACCAGCAGTGACGTTGGTGGTTATAACTATGTCTCCTGGTACCAACAACACCCAGGCAAAGCCCCCAAACTCATGATTTATGATGTCAGTAATCGGCCCTCAGGGGTTTCTAATCGCTTCTCTGGCTCCAAGTCTGGCAACACGGCCTCCCTGACCATCTCTGGGCTCCAGGCTGAGGACGAGGCTGATTATTACTGCAGCTCATATTCAAGCAGCAGCACTCTCGTGGTATTCGGCGGAGGGACCAAACTGACCGTCCTAGG	LV2-14	LJ2	SSYSSSSTLVV	11	1.2012
c28881	149812	NN	ATGGGGTCAACCGCCATCCTCGCCCTCCTCCTGGCTGTTCTCCAAGGAGTCTGTGCCGAGGTGCAGCTGGTGCAGTCTGGAGCAGAGGTGAAAAAGCCCGGGGAGTCTCTGAAGATCTCCTGTAAGGGTTCTGGAGACAGCTTTATCAACTACTGGATCGGCTGGGTGCGCCAGATGCCCGGGAAAGGCCTGGAGTACATGGGGATCATCTATCCTGGTGACTCTGATACCAGATACAGCCCGTCCTTCCGAGGCCAGGTCACCATCTCAGCCGACAAGTCCATCAGCACCGCCTACCTGCAGTGGAGCAGCCTGAAGGCCTCGGACACCGCCATGTATTACTGTGCGAGGATCGGTGTCCCGGGGCATATAGCAGTGGCTGATTACTACTTTGACTCC…	IGHV5-51*01	IGHD6-19*01	IGHJ4*02	ARIGVPGHIAVADYYFDS	18	1.76471	ATGGCCTGGGCTCTGCTATTCCTCACCCTCCTCACTCAGGGCACAGGGTCCTGGGCCCAGTCTGCCCTGACTCAGCCTGCCTCCGTGTCTGGGTCTCCTGGACAGTCGATCACCATCTCCTGCACTGGAACCAGCAGTGACGTTGGTGGTTATAACTATGTCTCCTGGTACCAACAACACCCAGGCAAAGCCCCCAAACTCATGATTTATGATGTCAGTAATCGGCCCTCAGGGGTTTCTAATCGCTTCTCTGGCTCCAAGTCTGGCAACACGGCCTCCCTGACCATCTCTGGGCTCCAGGCTGAGGACGAGGCTGATTATTACTGCAGCTCATATTCAAGCAGCAGCACTCTCGTGGTATTCGGCGGAGGGACCAAACTGACCGTCCTAGG	LV2-14	LJ2	SSYSSSSTLVV	11	1.2012
c28882	149812	NN	ATGGGGTCAACCGCCATCCTCGCCCTCCTCCTGGCTGTTCTCCAAGGAGTCTGTGCCGAGGTGCAGCTGGTGCAGTCTGGAGCAGAGGTGAAAAAGCCCGGGGAGTCTCTGAAGATCTCCTGTAAGGGTTCTGGAGACAGCTTTATCAACTACTGGATCGGCTGGGTGCGCCAGATGCCCGGGAAAGGCCTGGAGTACATGGGGATCATCTATCCTGGTGACTCTGATACCAGATACAGCCCGTCCTTCCGAGGCCAGGTCACCATCTCAGCCGACAAGTCCATCAGCACCGCCTACCTGCAGTGGAGCAGCCTGAAGGCCTCGGACACCGCCATGTATTACTGTGCGAGGATCGGTGTCCCGGGGCATATAGCAGTGGCTGATTACTACTTTGACTCC…	IGHV5-51*01	IGHD6-19*01	IGHJ4*02	ARIGVPGHIAVADYYFDS	18	1.76471	ATGGCCTGGGCTCTGCTATTCCTCACCCTCCTCACTCAGGGCACAGGGTCCTGGGCCCAGTCTGCCCTGACTCAGCCTGCCTCCGTGTCTGGGTCTCCTGGACAGTCGATCACCATCTCCTGCACTGGAACCAGCAGTGACGTTGGTGGTTATAACTATGTCTCCTGGTACCAACAACACCCAGGCAAAGCCCCCAAACTCATGATTTATGATGTCAGTAATCGGCCCTCAGGGGTTTCTAATCGCTTCTCTGGCTCCAAGTCTGGCAACACGGCCTCCCTGACCATCTCTGGGCTCCAGGCTGAGGACGAGGCTGATTATTACTGCAGCTCATATTCAAGCAGCAGCACTCTCGTGGTATTCGGCGGAGGGACCAAACTGACCGTCCTAGG	LV2-14	LJ2	SSYSSSSTLVV	11	1.2012
c29213	149812	NN	ATGGACTGGACCTGGAGGTTCCTCTTTGTGGTGGCAGCAGCTACAGGTGTCCAGTCCCAGGTCCAGCTGGTGCAGTCTGGGGCTGAGGTGAAGAGGCCTGGGTCCTCGGTGAGGGTCTCCTGCAAGGCTTCTGGATACACCTTCAACACCTATGCTGTCAGTTGGGTGCGACAGGCCCCAGGACAAGGTCTTGAGTGGATGGGAAGGATCATCCCTATCCTTGATAGAGCAAACTACGCAGAGAAGTTCCAGGGCAGAGTCACGATTACCGCGGACAGATCCACGACCACAGCCTACATGGAGCTGAGCAGCCTGAGATCTGAGGACACGGCCGTGTATTACTGTGCGAGAGATCTCTCCGTCTACGGTGGTAACTCTGCTTTTGATATCTGGGGCCAA…	IGHV1-69*04	IGHD4-23*01	IGHJ3*02	ARDLSVYGGNSAFDI	15	4.38596	ATGGAAACCCCAGCGCAGCTTCTCTTCCTCCTGCTACTCTGGCTCCCAGAAATCACCGGAGAAATTGTGTTGACGCAGTCTCCAGGCACCCTGTCTTTGTCTCCAGGGGAAAGAGCCTCCCTCTCCTGCAGGGCCAGTCACAGTGTTAGCAGCAGCTACTTAGCCTGGTACCAGCAGAAACCTGGCCAGGCTCCCAGCCTCCTCATCTATGGTGCATCCAGCAGGGCCACTGGCATCCCAGACAGGTTCAGTGGCAGTGGGTCTGGGACAGACTTCACTCTCACCATCAGCAGACTGGAGCCTGAAGATTTTGCAGTGTATTACTGTCAGCAGTATGCTAGCTCACCTGAAACGTTCGGCCAAGGGACCAAGGTGGAAATCAAACG	KV3-20	KJ1	QQYASSPET	9	1.24611
c29154	149812	NN	ATGGACTGGACCTGGAGGTTCCTCTTTGTGGTGGCAGCAGCTACAGGTGTCCAGTCCCAGGTCCAGCTGGTGCAGTCTGGGGCTGAGGTGAAGAGGCCTGGGTCCTCGGTGAGGGTCTCCTGCAAGGCTTCTGGATACACCTTCAACACCTATGCTGTCAGTTGGGTGCGACAGGCCCCAGGACAAGGTCTTGAGTGGATGGGAAGGATCATCCCTATCCTTGATAGAGCAAACTACGCAGAGAAGTTCCAGGGCAGAGTCACGATTACCGCGGACAGATCCACGACCACAGCCTACATGGAGCTGAGCAGCCTGAGATCTGAGGACACGGCCGTGTATTACTGTGCGAGAGATCTCTCCGTCTACGGTGGTAACTCTGCTTTTGATATCTGGGGCCAA…	IGHV1-69*04	IGHD4-23*01	IGHJ3*02	ARDLSVYGGNSAFDI	15	4.38596	ATGGAAACCCCAGCGCAGCTTCTCTTCCTCCTGCTACTCTGGCTCCCAGAAATCACCGGAGAAATTGTGTTGACGCAGTCTCCAGGCACCCTGTCTTTGTCTCCAGGGGAAAGAGCCTCCCTCTCCTGCAGGGCCAGTCACAGTGTTAGCAGCAGCTACTTAGCCTGGTACCAGCAGAAACCTGGCCAGGCTCCCAGCCTCCTCATCTATGGTGCATCCAGCAGGGCCACTGGCATCCCAGACAGGTTCAGTGGCAGTGGGTCTGGGACAGACTTCACTCTCACCATCAGCAGACTGGAGCCTGAAGATTTTGCAGTGTATTACTGTCAGCAGTATGCTAGCTCACCTGAAACGTTCGGCCAAGGGACCAAGGTGGAAATCAAACG	KV3-20	KJ1	QQYASSPET	9	1.24611
c29097	149812	NN	ATGGACTGGACCTGGAGGTTCCTCTTTGTGGTGGCAGCAGCTACAGGTGTCCAGTCCCAGGTCCAGCTGGTGCAGTCTGGGGCTGAGGTGAAGAGGCCTGGGTCCTCGGTGAGGGTCTCCTGCAAGGCTTCTGGATACACCTTCAACACCTATGCTGTCAGTTGGGTGCGACAGGCCCCAGGACAAGGTCTTGAGTGGATGGGAAGGATCATCCCTATCCTTGATAGAGCAAACTACGCAGAGAAGTTCCAGGGCAGAGTCACGATTACCGCGGACAGATCCACGACCACAGCCTACATGGAGCTGAGCAGCCTGAGATCTGAGGACACGGCCGTGTATTACTGTGCGAGAGATCTCTCCGTCTACGGTGGTAACTCTGCTTTTGATATCTGGGGCCAA…	IGHV1-69*04	IGHD4-23*01	IGHJ3*02	ARDLSVYGGNSAFDI	15	4.38596	ATGGAAACCCCAGCGCAGCTTCTCTTCCTCCTGCTACTCTGGCTCCCAGAAATCACCGGAGAAATTGTGTTGACGCAGTCTCCAGGCACCCTGTCTTTGTCTCCAGGGGAAAGAGCCTCCCTCTCCTGCAGGGCCAGTCACAGTGTTAGCAGCAGCTACTTAGCCTGGTACCAGCAGAAACCTGGCCAGGCTCCCAGCCTCCTCATCTATGGTGCATCCAGCAGGGCCACTGGCATCCCAGACAGGTTCAGTGGCAGTGGGTCTGGGACAGACTTCACTCTCACCATCAGCAGACTGGAGCCTGAAGATTTTGCAGTGTATTACTGTCAGCAGTATGCTAGCTCACCTGAAACGTTCGGCCAAGGGACCAAGGTGGAAATCAAACG	KV3-20	KJ1	QQYASSPET	9	1.24611
c29043	149812	NN	ATGGACTGGACCTGGAGGTTCCTCTTTGTGGTGGCAGCAGCTACAGGTGTCCAGTCCCAGGTCCAGCTGGTGCAGTCTGGGGCTGAGGTGAAGAGGCCTGGGTCCTCGGTGAGGGTCTCCTGCAAGGCTTCTGGATACACCTTCAACACCTATGCTGTCAGTTGGGTGCGACAGGCCCCAGGACAAGGTCTTGAGTGGATGGGAAGGATCATCCCTATCCTTGATAGAGCAAACTACGCAGAGAAGTTCCAGGGCAGAGTCACGATTACCGCGGACAGATCCACGACCACAGCCTACATGGAGCTGAGCAGCCTGAGATCTGAGGACACGGCCGTGTATTACTGTGCGAGAGATCTCTCCGTCTACGGTGGTAACTCTGCTTTTGATATCTGGGGCCAA…	IGHV1-69*04	IGHD4-23*01	IGHJ3*02	ARDLSVYGGNSAFDI	15	4.38596	ATGGAAACCCCAGCGCAGCTTCTCTTCCTCCTGCTACTCTGGCTCCCAGAAATCACCGGAGAAATTGTGTTGACGCAGTCTCCAGGCACCCTGTCTTTGTCTCCAGGGGAAAGAGCCTCCCTCTCCTGCAGGGCCAGTCACAGTGTTAGCAGCAGCTACTTAGCCTGGTACCAGCAGAAACCTGGCCAGGCTCCCAGCCTCCTCATCTATGGTGCATCCAGCAGGGCCACTGGCATCCCAGACAGGTTCAGTGGCAGTGGGTCTGGGACAGACTTCACTCTCACCATCAGCAGACTGGAGCCTGAAGATTTTGCAGTGTATTACTGTCAGCAGTATGCTAGCTCACCTGAAACGTTCGGCCAAGGGACCAAGGTGGAAATCAAACG	KV3-20	KJ1	QQYASSPET	9	1.24611
c29246	149812	NN	ATGGACTGGACCTGGAGGTTCCTCTTTGTGGTGGCAGCAGCTACAGGTGTCCAGTCCCAGGTCCAGCTGGTGCAGTCTGGGGCTGAGGTGAAGAGGCCTGGGTCCTCGGTGAGGGTCTCCTGCAAGGCTTCTGGATACACCTTCAACACCTATGCTGTCAGTTGGGTGCGACAGGCCCCAGGACAAGGTCTTGAGTGGATGGGAAGGATCATCCCTATCCTTGATAGAGCAAACTACGCAGAGAAGTTCCAGGGCAGAGTCACGATTACCGCGGACAGATCCACGACCACAGCCTACATGGAGCTGAGCAGCCTGAGATCTGAGGACACGGCCGTGTATTACTGTGCGAGAGATCTCTCCGTCTACGGTGGTAACTCTGCTTTTGATATCTGGGGCCAA…	IGHV1-69*04	IGHD4-23*01	IGHJ3*02	ARDLSVYGGNSAFDI	15	4.38596	ATGGAAACCCCAGCGCAGCTTCTCTTCCTCCTGCTACTCTGGCTCCCAGAAATCACCGGAGAAATTGTGTTGACGCAGTCTCCAGGCACCCTGTCTTTGTCTCCAGGGGAAAGAGCCTCCCTCTCCTGCAGGGCCAGTCACAGTGTTAGCAGCAGCTACTTAGCCTGGTACCAGCAGAAACCTGGCCAGGCTCCCAGCCTCCTCATCTATGGTGCATCCAGCAGGGCCACTGGCATCCCAGACAGGTTCAGTGGCAGTGGGTCTGGGACAGACTTCACTCTCACCATCAGCAGACTGGAGCCTGAAGATTTTGCAGTGTATTACTGTCAGCAGTATGCTAGCTCACCTGAAACGTTCGGCCAAGGGACCAAGGTGGAAATCAAACG	KV3-20	KJ1	QQYASSPET	9	1.24611
c29104	149812	NN	ATGGACTGGACCTGGAGGTTCCTCTTTGTGGTGGCAGCAGCTACAGGTGTCCAGTCCCAGGTCCAGCTGGTGCAGTCTGGGGCTGAGGTGAAGAGGCCTGGGTCCTCGGTGAGGGTCTCCTGCAAGGCTTCTGGATACACCTTCAACACCTATGCTGTCAGTTGGGTGCGACAGGCCCCAGGACAAGGTCTTGAGTGGATGGGAAGGATCATCCCTATCCTTGATAGAGCAAACTACGCAGAGAAGTTCCAGGGCAGAGTCACGATTACCGCGGACAGATCCACGACCACAGCCTACATGGAGCTGAGCAGCCTGAGATCTGAGGACACGGCCGTGTATTACTGTGCGAGAGATCTCTCCGTCTACGGTGGTAACTCTGCTTTTGATATCTGGGGCCAA…	IGHV1-69*04	IGHD4-23*01	IGHJ3*02	ARDLSVYGGNSAFDI	15	4.38596	ATGGAAACCCCAGCGCAGCTTCTCTTCCTCCTGCTACTCTGGCTCCCAGAAATCACCGGAGAAATTGTGTTGACGCAGTCTCCAGGCACCCTGTCTTTGTCTCCAGGGGAAAGAGCCTCCCTCTCCTGCAGGGCCAGTCACAGTGTTAGCAGCAGCTACTTAGCCTGGTACCAGCAGAAACCTGGCCAGGCTCCCAGCCTCCTCATCTATGGTGCATCCAGCAGGGCCACTGGCATCCCAGACAGGTTCAGTGGCAGTGGGTCTGGGACAGACTTCACTCTCACCATCAGCAGACTGGAGCCTGAAGATTTTGCAGTGTATTACTGTCAGCAGTATGCTAGCTCACCTGAAACGTTCGGCCAAGGGACCAAGGTGGAAATCAAACG	KV3-20	KJ1	QQYASSPET	9	1.24611
c28933	149812	NN	ATGGACTGGACCTGGAGGTTCCTCTTTGTGGTGGCAGCAGCTACAGGTGTCCAGTCCCAGGTCCAGCTGGTGCAGTCTGGGGCTGAGGTGAAGAGGCCTGGGTCCTCGGTGAGGGTCTCCTGCAAGGCTTCTGGATACACCTTCAACACCTATGCTGTCAGTTGGGTGCGACAGGCCCCAGGACAAGGTCTTGAGTGGATGGGAAGGATCATCCCTATCCTTGATAGAGCAAACTACGCAGAGAAGTTCCAGGGCAGAGTCACGATTACCGCGGACAGATCCACGACCACAGCCTACATGGAGCTGAGCAGCCTGAGATCTGAGGACACGGCCGTGTATTACTGTGCGAGAGATCTCTCCGTCTACGGTGGTAACTCTGCTTTTGATATCTGGGGCCAA…	IGHV1-69*04	IGHD4-23*01	IGHJ3*02	ARDLSVYGGNSAFDI	15	4.38596	ATGGAAACCCCAGCGCAGCTTCTCTTCCTCCTGCTACTCTGGCTCCCAGAAATCACCGGAGAAATTGTGTTGACGCAGTCTCCAGGCACCCTGTCTTTGTCTCCAGGGGAAAGAGCCTCCCTCTCCTGCAGGGCCAGTCACAGTGTTAGCAGCAGCTACTTAGCCTGGTACCAGCAGAAACCTGGCCAGGCTCCCAGCCTCCTCATCTATGGTGCATCCAGCAGGGCCACTGGCATCCCAGACAGGTTCAGTGGCAGTGGGTCTGGGACAGACTTCACTCTCACCATCAGCAGACTGGAGCCTGAAGATTTTGCAGTGTATTACTGTCAGCAGTATGCTAGCTCACCTGAAACGTTCGGCCAAGGGACCAAGGTGGAAATCAAACG	KV3-20	KJ1	QQYASSPET	9	1.24611
c28796	149812	NN	ATGGACTGGACCTGGAGGTTCCTCTTTGTGGTGGCAGCAGCTACAGGTGTCCAGTCCCAGGTCCAGCTGGTGCAGTCTGGGGCTGAGGTGAAGAGGCCTGGGTCCTCGGTGAGGGTCTCCTGCAAGGCTTCTGGATACACCTTCAACACCTATGCTGTCAGTTGGGTGCGACAGGCCCCAGGACAAGGTCTTGAGTGGATGGGAAGGATCATCCCTATCCTTGATAGAGCAAACTACGCAGAGAAGTTCCAGGGCAGAGTCACGATTACCGCGGACAGATCCACGACCACAGCCTACATGGAGCTGAGCAGCCTGAGATCTGAGGACACGGCCGTGTATTACTGTGCGAGAGATCTCTCCGTCTACGGTGGTAACTCTGCTTTTGATATCTGGGGCCAA…	IGHV1-69*04	IGHD4-23*01	IGHJ3*02	ARDLSVYGGNSAFDI	15	4.38596	ATGGAAACCCCAGCGCAGCTTCTCTTCCTCCTGCTACTCTGGCTCCCAGAAATCACCGGAGAAATTGTGTTGACGCAGTCTCCAGGCACCCTGTCTTTGTCTCCAGGGGAAAGAGCCTCCCTCTCCTGCAGGGCCAGTCACAGTGTTAGCAGCAGCTACTTAGCCTGGTACCAGCAGAAACCTGGCCAGGCTCCCAGCCTCCTCATCTATGGTGCATCCAGCAGGGCCACTGGCATCCCAGACAGGTTCAGTGGCAGTGGGTCTGGGACAGACTTCACTCTCACCATCAGCAGACTGGAGCCTGAAGATTTTGCAGTGTATTACTGTCAGCAGTATGCTAGCTCACCTGAAACGTTCGGCCAAGGGACCAAGGTGGAAATCAAACG	KV3-20	KJ1	QQYASSPET	9	1.24611
c29044	149812	NN	ATGGAGTTTGGGCTGAGCTGGCTTTTTCTTGTGGCTATTTTAAAAGGTGTCCAGTGTGAGGTGCAGCTGTTGGAGTCTGGGGGAGGCTTGGTACAGCCTGGGGGGTCCCTGAGACTCTCCTGTGCAGCCTCTGGATTCTCCTTTATCAACTATGCCATGAGCTGGGTCCGCCAGGCTCCAGGGAAGGGGCTGGAGTGGGCCTCAGCTATCACTGGTAGTGGTGGTACCACATACTACGCAGACTCCGTGAAGGGCCGGTTCACCATCTCCAGAGACAATTCCAAGAACACACTGTATCTGCAAATGAACAGCCTGGGAGCCGAGGACACGGCCGTATATTACTGTGCGAAAGATAGTGGTGGTCATGGGTGGGTGGTTGACTACTGGGGTCAGGGAACC…	IGHV3-23*01	IGHD2-15*01	IGHJ4*02	AKDSGGHGWVVDY	13	2.96736	ATGACCTGCTCCCCTCTCCTCCTCACCCTTCTCATTCACTGCACAGGGTCCTGGGCCCAGTCTGTGTTGACGCAGCCGCCCTCAGTGTCTGCGGCCCCAGGACAGAGGGTCACCATCTCCTGCTCTGGAAGCAGCTCCAACATTGGGAATTATCATGTATCATGGTACCAGCAGGTCGCAGGCACAGCCCCCAAACTCCTCATTTATGACAATAATAAGCGACCCTCAGGGATTCCTGACCGATTCTCTGGCTCCAGGTCTGGCACGTCAGCCACCCTGGGCATCACCGGACTCCAGACTGGGGACGAGGCCGATTATTACTGCGGCTCATGGGATAGCAGCCTGGGTGTTGTAGTATTCGGCGGAGGGACCAAGCTGACCGTCCTAGG	LV1-51	LJ2	GSWDSSLGVVV	11	3.65854
c28657	149812	NN	ATGGAGTTTGGGCTGAGCTGGCTTTTTCTTGTGGCTATTTTAAAAGGTGTCCAGTGTGAGGTGCAGCTGTTGGAGTCTGGGGGAGGCTTGGTACAGCCTGGGGGGTCCCTGAGACTCTCCTGCGCAGCCTCTGGATTCTCCTTTATCAACTATGCCATGAGCTGGGTCCGCCAGGCTCCAGGGAAGGGGCTGGAGTGGGCCTCAGCTATCACTGGTAGTGGTGGTACCACATACTACGCAGACTCCGTGAAGGGCCGGTTCACCATCTCCAGAGACAATTCCAAGAACACACTGTATCTGCAAATGAACAGCCTGGGAGCCGAGGACACGGCCGTATATTACTGTGCGAAAGATAGTGGTGGTCATGGGTGGGTGGTTGACTACTGGGGTCAGGGAACC…	IGHV3-23*01	IGHD2-15*01	IGHJ4*02	AKDSGGHGWVVDY	13	3.26409	ATGACCTGCTCCCCTCTCCTCCTCACCCTTCTCATTCACTGCACAGGGTCCTGGGCCCAGTCTGTGTTGACGCAGCCGCCCTCAGTGTCTGCGGCCCCAGGACAGAGGGTCACCATCTCCTGCTCTGGAAGCAGCTCCAACATTGGGAATTATCATGTATCATGGTACCAGCAGGTCGCAGGCACAGCCCCCAAACTCCTCATTTATGACAATAATAAGCGACCCTCAGGGATTCCTGACCGATTCTCTGGCTCCAGGTCTGGCACGTCAGCCACCCTGGGCATCACCGGACTCCAGACTGGGGACGAGGCCGATTATTACTGCGGCTCATGGGATAGCAGCCTGGGTGTTGTAGTATTCGGCGGAGGGACCAAGCTGACCGTCCTAGG	LV1-51	LJ2	GSWDSSLGVVV	11	3.65854
c28902	149812	NN	ATGGAGTTTGGGCTGAGCTGGCTTTTTCTTGTGGCTATTTTAAAAGGTGTCCAGTGTGAGGTGCAGCTGTTGGAGTCTGGGGGAGGCTTGGTACAGCCTGGGGGGTCCCTGAGACTCTCCTGTGCAGCCTCTGGATTCTCCTTTATCAACTATGCCATGAGCTGGGTCCGCCAGGCTCCAGGGAAGGGGCTGGAGTGGGCCTCAGCTATCACTGGTAGTGGTGGTACCACATACTACGCAGACTCCGTGAAGGGCCGGTTCACCATCTCCAGAGACAATTCCAAGAACACACTGTATCTGCAAATGAACAGCCTGGGAGCCGAGGACACGGCCGTATATTACTGTGCGAAAGATAGTGGTGGTCATGGGTGGGTGGTTGACTACTGGGGTCAGGGAACC…	IGHV3-23*01	IGHD2-15*01	IGHJ4*02	AKDSGGHGWVVDY	13	2.96736	ATGACCTGCTCCCCTCTCCTCCTCACCCTTCTCATTCACTGCACAGGGTCCTGGGCCCAGTCTGTGTTGACGCAGCCGCCCTCAGTGTCTGCGGCCCCAGGACAGAGGGTCACCATCTCCTGCTCTGGAAGCAGCTCCAACATTGGGAATTATCATGTATCATGGTACCAGCAGGTCGCAGGCACAGCCCCCAAACTCCTCATTTATGACAATAATAAGCGACCCTCAGGGATTCCTGACCGATTCTCTGGCTCCAGGTCTGGCACGTCAGCCACCCTGGGCATCACCGGACTCCAGACTGGGGACGAGGCCGATTATTACTGCGGCTCATGGGATAGCAGCCTGGGTGTTGTAGTATTCGGCGGAGGGACCAAGCTGACCGTCCTAGG	LV1-51	LJ2	GSWDSSLGVVV	11	3.65854
c28738	149812	NN	ATGAAACATCTGTGGTTCTTCCTTCTCCTGGTGGCAGCTCCCAGATGGGTCCTGTCCCAGGTGCAGCTGCAGGAGTCGGGCCCAGGACTGGTGAAGCCTTCGGAGACCCTGTCCCTCACCTGCACTGTCTCTGGTGGCTCCATCAGTAGTTACTACTGGAGCTGGATCCGGCAGCCCCCAGGGAAGGGACTGGAGTGGATTGGATATATGTATTATAGTGGGAGCACCAACTACAACCCCTCCCTCAAGAGTCGAGTCACCATATCAGTGGACACGTCCAAGAATCAGCTCTCCCTGAAGCTGAGCTCTGTGACCGCCGCAGACACGGCCGTGTATTACTGTGCGGGGGCCGCTCCTACCGCCGCCCTTCGCCTTGACTCCTGGGGCCAGGGAACCCTG…	IGHV4-59*08		IGHJ4*02	AGAAPTAALRLDS	13	2.12766	ATGGCCTGGGCTCCACTACTTCTCACCCTCCTCGCTCACTGCACAGGTTCTTGGGCCAATTTTATGCTGACTCAGCCGCACTCTGTGTCGGAGTCTCCGGGGAAGACGGTAACCCTCTCCTGCACCCGCGGCAGTGGCAGCATTGCCGGCAACTATGTGCAGTGGTACCAGCAGCGCCCGGGCAGTGCCCCCACCACTGTGATCTATGAGGATAACCAAAGACCCTCTGGGGTCCCTGATCGATTCTCTGGCTCCACCGACAGCTCCTCCAACTCTGCCTCCCTCACCATCTCTGGACTGAAGACTGAGGACGAGGCTGACTACTACTGTCAGTCTTATGATAGCAGCAATCATTGGGTGTTCGGCGGAGGGACCAAGCTGACCGTCCTAGG	LV6-57	LJ3	QSYDSSNHWV	10	1.8018
c28775	149812	NN	ATGAAACATCTGTGGTTCTTCCTTCTCCTGGTGGCAGCTCCCAGATGGGTCCTGTCCCAGGTGCAGCTGCAGGAGTCGGGCCCAGGACTGGTGAAGCCTTCGGAGACCCTGTCCCTCACCTGCACTGTCTCTGGTGGCTCCATCAGTAGTTACTACTGGAGCTGGATCCGGCAGCCCCCAGGGAAGGGACTGGAGTGGATTGGATATATGTATTATAGTGGGAGCACCAACTACAACCCCTCCCTCAAGAGTCGAGTCACCATATCAGTGGACACGTCCAAGAATCAGCTCTCCCTGAAGCTGAGCTCTGTGACCGCCGCAGACACGGCCGTGTATTACTGTGCGGGGGCCGCTCCTACCGCCGCCCTTCGCCTTGACTCCTGGGGCCAGGGAACCCTG…	IGHV4-59*08		IGHJ4*02	AGAAPTAALRLDS	13	2.12766	ATGGCCTGGGCTCCACTACTTCTCACCCTCCTCGCTCACTGCACAGGTTCTTGGGCCAATTTTATGCTGACTCAGCCGCACTCTGTGTCGGAGTCTCCGGGGAAGACGGTAACCCTCTCCTGCACCCGCGGCAGTGGCAGCATTGCCGGCAACTATGTGCAGTGGTACCAGCAGCGCCCGGGCAGTGCCCCCACCACTGTGATCTATGAGGATAACCAAAGACCCTCTGGGGTCCCTGATCGATTCTCTGGCTCCACCGACAGCTCCTCCAACTCTGCCTCCCTCACCATCTCTGGACTGAAGACTGAGGACGAGGCTGACTACTACTGTCAGTCTTATGATAGCAGCAATCATTGGGTGTTCGGCGGAGGGACCAAGCTGACCGTCCTAGG	LV6-57	LJ3	QSYDSSNHWV	10	1.8018
c28710	149812	NN	ATGAAACATCTGTGGTTCTTCCTTCTCCTGGTGGCAGCTCCCAGATGGGTCCTGTCCCAGGTGCAGCTGCAGGAGTCGGGCCCAGGACTGGTGAAGCCTTCGGAGACCCTGTCCCTCACCTGCACTGTCTCTGGTGGCTCCATCAGTAGTTACTACTGGAGCTGGATCCGGCAGCCCCCAGGGAAGGGACTGGAGTGGATTGGATATATGTATTATAGTGGGAGCACCAACTACAACCCCTCCCTCAAGAGTCGAGTCACCATATCAGTGGACACGTCCAAGAATCAGCTCTCCCTGAAGCTGAGCTCTGTGACCGCCGCAGACACGGCCGTGTATTACTGTGCGGGGGCCGCTCCTACCGCCGCCCTTCGCCTTGACTCCTGGGGCCAGGGAACCCTG…	IGHV4-59*08		IGHJ4*02	AGAAPTAALRLDS	13	2.12766	ATGGCCTGGGCTCCACTACTTCTCACCCTCCTCGCTCACTGCACAGGTTCTTGGGCCAATTTTATGCTGACTCAGCCGCACTCTGTGTCGGAGTCTCCGGGGAAGACGGTAACCCTCTCCTGCACCCGCGGCAGTGGCAGCATTGCCGGCAACTATGTGCAGTGGTACCAGCAGCGCCCGGGCAGTGCCCCCACCACTGTGATCTATGAGGATAACCAAAGACCCTCTGGGGTCCCTGATCGATTCTCTGGCTCCACCGACAGCTCCTCCAACTCTGCCTCCCTCACCATCTCTGGACTGAAGACTGAGGACGAGGCTGACTACTACTGTCAGTCTTATGATAGCAGCAATCATTGGGTGTTCGGCGGAGGGACCAAGCTGACCGTCCTAGG	LV6-57	LJ3	QSYDSSNHWV	10	1.8018
c28923	149812	NN	ATGAAACATCTGTGGTTCTTCCTTCTCCTGGTGGCAGCTCCCAGATGGGTCCTGTCCCAGGTGCAGCTGCAGGAGTCGGGCCCAGGACTGGTGAAGCCTTCGGAGACCCTGTCCCTCACCTGCACTGTCTCTGGTGGCTCCATCAGTAGTTACTACTGGAGCTGGATCCGGCAGCCCCCAGGGAAGGGACTGGAGTGGATTGGATATATGTATTATAGTGGGAGCACCAACTACAACCCCTCCCTCAAGAGTCGAGTCACCATATCAGTGGACACGTCCAAGAATCAGCTCTCCCTGAAGCTGAGCTCTGTGACCGCCGCAGACACGGCCGTGTATTACTGTGCGGGGGCCGCTCCTACCGCCGCCCTTCGCCTTGACTCCTGGGGCCAGGGAACCCTG…	IGHV4-59*08		IGHJ4*02	AGAAPTAALRLDS	13	2.12766	ATGGCCTGGGCTCCACTACTTCTCACCCTCCTCGCTCACTGCACAGGTTCTTGGGCCAATTTTATGCTGACTCAGCCGCACTCTGTGTCGGAGTCTCCGGGGAAGACGGTAACCCTCTCCTGCACCCGCGGCAGTGGCAGCATTGCCGGCAACTATGTGCAGTGGTACCAGCAGCGCCCGGGCAGTGCCCCCACCACTGTGATCTATGAGGATAACCAAAGACCCTCTGGGGTCCCTGATCGATTCTCTGGCTCCACCGACAGCTCCTCCAACTCTGCCTCCCTCACCATCTCTGGACTGAAGACTGAGGACGAGGCTGACTACTACTGTCAGTCTTATGATAGCAGCAATCATTGGGTGTTCGGCGGAGGGACCAAGCTGACCGTCCTAGG	LV6-57	LJ3	QSYDSSNHWV	10	1.8018
c28709	149812	NN	ATGAAACATCTGTGGTTCTTCCTTCTCCTGGTGGCAGCTCCCAGATGAGTCCTGTCCCAGGTGCAGCTGCAGGAGTCGGGCCCAGGACTGGTGAAGCCTTCGGAGACCCTGTCCCTCACCTGCACTGTCTCTGGTGGCTCCATCAGTAGTTACTACTGGAGCTGGATCCGGCAGCCCCCAGGGAAGGGACTGGAGTGGATTGGATATATGTATTATAGTGGGAGCACCAACTACAACCCCTCCCTCAAGAGTCGAGTCACCATATCAGTGGACACGTCCAAGAATCAGCTCTCCCTGAAGCTGAGCTCTGTGACCGCCGCAGACACGGCCGTGTATTACTGTGCGGGGGCCGCTCCTACCGCCGCCCTTCGCCTTGACTCCTGGGGCCAGGGAACCCTG…	IGHV4-59*08		IGHJ4*02	AGAAPTAALRLDS	13	2.12766	ATGGCCTGGGCTCCACTACTTCTCACCCTCCTCGCTCACTGCACAGGTTCTTGGGCCAATTTTATGCTGACTCAGCCGCACTCTGTGTCGGAGTCTCCGGGGAAGACGGTAACCCTCTCCTGCACCCGCGGCAGTGGCAGCATTGCCGGCAACTATGTGCAGTGGTACCAGCAGCGCCCGGGCAGTGCCCCCACCACTGTGATCTATGAGGATAACCAAAGACCCTCTGGGGTCCCTGATCGATTCTCTGGCTCCACCGACAGCTCCTCCAACTCTGCCTCCCTCACCATCTCTGGACTGAAGACTGAGGACGAGGCTGACTACTACTGTCAGTCTTATGATAGCAGCAATCATTGGGTGTTCGGCGGAGGGACCAAGCTGACCGTCCTAGG	LV6-57	LJ3	QSYDSSNHWV	10	1.8018
c29063	149812	NN	ATGAAACATCTGTGGTTCTTCCTTCTCCTGGTGGCAGCTCCCAGATGGGTCCTGTCCCAGGTGCAGCTGCAGGAGTCGGGCCCAGGACTGGTGAAGCCTTCGGAGACCCTGTCCCTCACCTGCACTGTCTCTGGTGGCTCCATCAGTAGTTACTACTGGAGCTGGATCCAGCAGCCCCCAGGGAAGGGACTGGAGTGGATTGGATATATGTATTATAGTGGGAGCACCAACTACAACCCCTCCCTCAAGAGTCGAGTCACCATATCAGTGGACACGTCCAAGAATCAGCTCTCCCTGAAGCTGAGCTCTGTGACCGCCGCAGACACGGCCGTGTATTACTGTGCGGGGGCCGCTCCTACCGCCGCCCTTCGCCTTGACTCCTGGGGCCAGGGAACCCTG…	IGHV4-59*08		IGHJ4*02	AGAAPTAALRLDS	13	2.43161	ATGGCCTGGGCTCCACTACTTCTCACCCTCCTCGCTCACTGCACAGGTTCTTGGGCCAATTTTATGCTGACTCAGCCGCACTCTGTGTCGGAGTCTCCGGGGAAGACGGTAACCCTCTCCTGCACCCGCGGCAGTGGCAGCATTGCCGGCAACTATGTGCAGTGGTACCAGCAGCGCCCGGGCAGTGCCCCCACCACTGTGATCTATGAGGATAACCAAAGACCCTCTGGGGTCCCTGATCGATTCTCTGGCTCCACCGACAGCTCCTCCAACTCTGCCTCCCTCACCATCTCTGGACTGAAGACTGAGGACGAGGCTGACTACTACTGTCAGTCTTATGATAGCAGCAATCATTGGGTGTTCGGCGGAGGGACCAAGCTGACCGTCCTAGG	LV6-57	LJ3	QSYDSSNHWV	10	1.8018
c28797	149812	NN	ATGAAACATCTGTGGTTCTTCCTTCTCCTGGTGGCAGCTCCCAGATGGGTCCTGTCCCAGGTGCAGCTGCAGGAGTCGGGCCCAGGACTGGTGAAGCCTTCGGAGACCCTGTCCCTCACCTGCACTGTCTCTGGTGGCTCCATCAGTAGTTACTACTGGAGCTGGATCCGGCAGCCCCCAGGGAAGGGACTGGAGTGGATTGGATATATGTATTATAGTGGGAGCACCAACTACAACCCCTCCCTCAAGAGTCGAGTCACCATATCAGTGGACACGTCCAAGAATCAGCTCTCCCTGAAGCTGAGCTCTGTGACCGCCGCAGACACGGCCGTGTATTACTGTGCGGGGGCCGCTCCTACCGCCGCCCTTCGCCTTGACTCCTGGGGCCAGGGAACCCTG…	IGHV4-59*08		IGHJ4*02	AGAAPTAALRLDS	13	2.12766	ATGGCCTGGGCTCCACTACTTCTCACCCTCCTCGCTCACTGCACAGGTTCTTGGGCCAATTTTATGCTGACTCAGCCGCACTCTGTGTCGGAGTCTCCGGGGAAGACGGTAACCCTCTCCTGCACCCGCGGCAGTGGCAGCATTGCCGGCAACTATGTGCAGTGGTACCAGCAGCGCCCGGGCAGTGCCCCCACCACTGTGATCTATGAGGATAACCAAAGACCCTCTGGGGTCCCTGATCGATTCTCTGGCTCCACCGACAGCTCCTCCAACTCTGCCTCCCTCACCATCTCTGGACTGAAGACTGAGGACGAGGCTGACTACTACTGTCAGTCTTATGATAGCAGCAATCATTGGGTGTTCGGCGGAGGGACCAAGCTGACCGTCCTAGG	LV6-57	LJ3	QSYDSSNHWV	10	1.8018
c28887	149812	NN	ATGAAACATCTGTGGTTCTTCCTTCTCCTGGTGGCAGCTCCCAGATGGGTCCTGTCCCAGGTGCAGCTGCAGGAGTCGGGCCCAGGACTGGTGAAGCCTTCGGAGACCCTGTCCCTCACCTGCACTGTCTCTGGTGGCTCCATCAGTAGTTACTACTGGAGCTGGATCCGGCAGCCCCCAGGGAAGGGACTGGAGTGGATTGGATATATGTATTATAGTGGGAGCACCAACTACAACCCCTCCCTCAAGAGTCGAGTCACCATATCAGTGGACACGTCCAAGAATCAGCTCTCCCTGAAGCTGAGCTCTGTGACCGCCGCAGACACGGCCGTGTATTACTGTGCGGGGGCCGCTCCTACCGCCGCCCTTCGCCTTGACTCCTGGGGCCAGGGAACCCTG…	IGHV4-59*08		IGHJ4*02	AGAAPTAALRLDS	13	2.12766	ATGGCCTGGGCTCCACTACTTCTCACCCTCCTCGCTCACTGCACAGGTTCTTGGGCCAATTTTATGCTGACTCAGCCGCACTCTGTGTCGGAGTCTCCGGGGAAGACGGTAACCCTCTCCTGCACCCGCGGCAGTGGCAGCATTGCCGGCAACTATGTGCAGTGGTACCAGCAGCGCCCGGGCAGTGCCCCCACCACTGTGATCTATGAGGATAACCAAAGACCCTCTGGGGTCCCTGATCGATTCTCTGGCTCCACCGACAGCTCCTCCAACTCTGCCTCCCTCACCATCTCTGGACTGAAGACTGAGGACGAGGCTGACTACTACTGTCAGTCTTATGATAGCAGCAATCATTGGGTGTTCGGCGGAGGGACCAAGCTGACCGTCCTAGG	LV6-57	LJ3	QSYDSSNHWV	10	1.8018
c28665	149812	NN	ATGGAGTTTGGGCTGAGCTGGGTTTTCCTCGTTGCTCTTTTAAGAGGTGTCCAGTGTCAGGTGCAGCTGGTGGAGTCTGGGGGAGGCGTGGTCCAGCCTGGGAGGTCCCTGAGACTCTCCTGTGCAGCCTCTGGATTCACCTTCAGTAGATATGCTATGCACTGGGTCCGCCAGGCTCCAGGCAAGGGGCTGGAGTGGGTGGCAGCTATATTATATGATGGAAGTAATGAATACTACGCAGACTCCGTGAAGGGCCGATTCACCATCTCCAGAGACAATTCCAAGAACACGCTGTATCTGCAAATGAACAGCCTGAGAGCTGAGGACACGGCTGTGTATTACTGTGCGTTTTCTTATGATAGTGGTGGTTATTACCGAAACTTTGACTACTGGGGCCAG…	IGHV3-30*04	IGHD3-22*01	IGHJ4*02	AFSYDSGGYYRNFDY	15	1.19403	ATGGTGTTGCAGACCCAGGTCTTCATTTCTCTGTTGCTCTGGATCTCTGGTGCCTACGGGGACATCGTGATGACCCAGTCTCCAGACTCCCTGGCTGTGTCTCTGGGCGAGAGGGCCACCATCAACTGCAAGTCCAGCCAGAGTGTTTTATACAGCTCCAACAATAAGAACTACTTAGCTTGGTACCAGCAGAAACCAGGACAGCCTCCTAAGCTGCTCATTTACTGGGCATCTACCCGGGAATCCGGGGTCCCTGACCGATTCAGTGGCAGCGGGTCTGGGACAGATTTCACTCTCACCATCAGCAGCCTGCAGGCTGAAGATGTGGCAGTTTATTACTGTCAGCAATATTATAGTACTCCTTTCACTTTCGGCCCTGGGACCAAAGTGGATATCAAA…	KV4-1	KJ3	QQYYSTPFT	9	0
c28909	149812	NN	ATGGAGTTTGGGCTGAGCTGGGTTTTCCTCGTTGCTCTTTTAAGAGGTGTCCAGTGTCAGGTGCAGCTGGTGGAGTCTGGGGGAGGCGTGGTCCAGCCTGGGAGGTCCCTGAGACTCTCCTGTGCAGCCTCTGGATTCACCTTCAGTAGATATGCTATGCACTGGGTCCGCCAGGCTCCAGGCAAGGGGCTGGAGTGGGTGGCAGCTATATTATATGATGGAAGTAATGAATACTACGCAGACTCCGTGAAGGGCCGATTCACCATCTCCAGAGACAATTCCAAGAACACGCTGTATCTGCAAATGAACAGCCTGAGAGCTGAGGACACGGCTGTGTATTACTGTGCGTTTTCTTATGATAGTGGTGGTTATTACCGAAACTTTGACTACTGGGGCCAG…	IGHV3-30*04	IGHD3-22*01	IGHJ4*02	AFSYDSGGYYRNFDY	15	1.19403	ATGGTGTTGCAGACCCAGGTCTTCATTTCTCTGTTGCTCTGGATCTCTGGTGCCTACGGGGACATCGTGATGACCCAGTCTCCAGACTCCCTGGCTGTGTCTCTGGGCGAGAGGGCCACCATCAACTGCAAGTCCAGCCAGAGTGTTTTATACAGCTCCAACAATAAGAACTACTTAGCTTGGTACCAGCAGAAACCAGGACAGCCTCCTAAGCTGCTCATTTACTGGGCATCTACCCGGGAATCCGGGGTCCCTGACCGATTCAGTGGCAGCGGGTCTGGGACAGATTTCACTCTCACCATCAGCAGCCTGCAGGCTGAAGATGTGGCAGTTTATTACTGTCAGCAATATTATAGTACTCCTTTCACTTTCGGCCCTGGGACCAAAGTGGATATCAAA…	KV4-1	KJ3	QQYYSTPFT	9	0
c28841	149812	NN	ATGGAGTTTGGGCTGAGCTGGGTTTTCCTCGTTGCTCTTTTAAGAGGTGTCCAGTGTCAGGTGCAGCTGGTGGAGTCTGGGGGAGGCGTGGTCCAGCCTGGGAGGTCCCTGAGACTCTCCTGTGCAGCCTCTGGATTCACCTTCAGTAGCTATGGCATGCACTGGGTCCGCCAGGCTCCAGGCAAGGGGCTGGAGTGGGTGGCAGTTATATCATATGATGGAAGTAATAAATACTATGCAGACTCCGTGAAGGGCCGATTCACCATCTCCAGAGACAATTCCAAGAACACGCTGTATCTGCAAATGAACAGCCTGAGAGCTGAGGACACGGCTGTGTATTACTGTGCGAAAGATAGCCATAGCAGTGGCTGGTACGGCTGGGTTGACTACTGGGGCCAG…	IGHV3-30*18	IGHD6-19*01	IGHJ4*02	AKDSHSSGWYGWVDY	15	0	ATGGCATGGATCCCTCTCTTCCTCGGCGTCCTTGCTTACTGCACAGGATCCGTGGCCTCCTATGAGCTGACTCAGCCACCCTCAGTGTCCGTGTCCCCAGGACAGACAGCCAGCATCACCTGCTCTGGAGATAAATTGGGGGATAAATATGCTTGCTGGTATCAGCAGAAGCCAGGCCAGTCCCCTGTGCTGGTCATCTATCAAGATAGCAAGCGGCCCTCAGGGATCCCTGAGCGATTCTCTGGCTCCAACTCTGGGAACACAGCCACTCTGACCATCAGCGGGACCCAGGCTATGGATGAGGCTGACTATTACTGTCAGGCGTGGGACAGCAGCACCGGGGTCTTCGGAACTGGGACCAAGGTCACCGTCCTAGG	LV3-1	LJ1	QAWDSSTGV	9	0
c29068	149812	NN	ATGGAGTTTGGGCTGAGCTGGGTTTTCCTCGTTGCTCTTTTAAGAGGTGTCCAGTGTGAGGTGCAGCTGGTGGAGTCTGGGGGAGGCGTGGTCCAGCCTGGGAGGTCCCTAAGACTCTCCTGTGCAGCCTCTGGATTCACCTTCAATAGTTATGGCATGCACTGGGTCCGCCAGGCTCCAGGCAAGGGGCTGGAGTGGGTGGCACTTATTTCATTTGATGGAAATAACAAATATTATGCAGACTCTGTGAAGGGCCGATTCACCATCTCCAGAGACAATTCGAAGAATACACTGTTTCTGCAAATGAGCGACCTGAGGCCTGAGGACACGGCTGTGTTTTATTGTGCGAAGGAGGTCGACGACTACGATTTTTGGGGTGGCCCCACGTGGACAGGCCCC…	IGHV3-30*18	IGHD3-3*01	IGHJ4*01	AKEVDDYDFWGGPTWTGPPDY	21	7.46269	ATGGCCGGCTTCCCTCTCCTCCTCACCCTCCTCACTCACTGGGCAGGGTCCTGGGCCCAGTCTGTGCTGACTCAGCCACCCTCAGCGTCTGGGACCCCCGGGCAGAGGGTCACCATTTCTTGTTCTGGAAGCAACTCCAACATCGGAACTAATAATTTATATTGGTACCAGAAACTCCCAGGAACGGCCCCCAAACTCCTCCTCTATAGGAATAGTCAGCGGCCCTTAGGGGTCCCTGACCGATTCTCTGGCTCCAAGTCTGGCACCTCAGCCTCCCTGGCCATCAGTGGACTCCGGTCCGAGGATGAGGCTGATTATTACTGTGCAGCATGGGATGACAGTCTGAGTGGTTGGGTGTTCGGCGGAGGGACCGAGCTGACCGTCCAAGG	LV1-47	LJ3	AAWDDSLSGWV	11	4.28135
c28915	149812	NN	ATGAAACACCTGTGGTTCTTCCTCCTGCTGGTGGCAGCTCCCAGATGGGTCCTGTCCCAGGTCCAGCTGCTGGAGTCGGGCCCAGGACTTGTGAAGCCTTCACACACCCTGTCCCTCACGTGTAGTGTCTCTGGTGGCTCCGTCAGTGGTGGTGGCTACAATTGGAGTTGGCTCCGCCAGCACCCCGTGAAGGGCCTGGAGTGGATTGGATATATTGATAATTCTGGGAGCACGTATTACAACCCGTCTCTCAAGAGTCGAGTTGCCATATCACTAGACAGGTCAAAGAACCATATCTCCCTGGAGCTGAGGTCCGTGACTGCCGCGGACACGGCCGTATATTATTGTGCGACGGAAAATTTCGGTGACAGCGATTACCTTGACTACTGGGGCCAGGGA…	IGHV4-31*02	IGHD4-17*01	IGHJ4*02	ATENFGDSDYLDY	13	11.6071	ATGGACATGAGGGTCCCCGCTCAGCTCCTGGGGCTCCTGCTACTCTGGCTCCGAGGTGCCAGATGTGACATCCAGATGACCCAGTCTCCATCCTCCCTGTCTGCATCTGTCGGAGACCGAGTCACCATCACTTGCCGGACAGGTCAGACTATTAACAAATTTTTAAATTGGTATCAACAGAAGCCAGGGAAAGCCCCTAAGGTCCTGATCTTTGGTGTTTCCAATTTGCAACGTGGAGTCCCATCAAGGTTCAGTGGCAGTGGATCTGGGACAGAATTCACTCTCACCATCAACAGTCTCCAACCTGAAGATTTTGCAACTTACTATTGTCAACAGAGTTACAGTTTTCGAACGTTCGGCCAAGGGACCAAGGTGGAAATCAAACG	KV1-39	KJ1	QQSYSFRT	8	7.69231
c28994	149812	NN	ATGGACACACTTTGCTACACACTCCTGCTGCTGACCACCCCTTCCTGGGTCTTGTCCCAGGTCACCTTGAAGGAGTCTGGTCCTGTACTGGTGAAACCCACAGAGACCCTCACGCTTACCTGCACCGTCTCTGGGTTGCCACTCAACAATGCTAGAATGGGTGTGAGCTGGATCCGTCAGCCCCCAGGGAAGGCCCTGGAGTGGCTTGCACACATTTTTTCGAATGACGAAAAATCCTACAGCACATCTCTGAAGAGCAGGCTCACCATCTCCAAGGACACCTCCAAAAGCCAGGTGGTCCTTACCATGACCAACATGGACCCTGTGGACACAGCCACATATTACTGTGCACGGATCGTAAAGTGGGAATTACTCTCGTTTGACTATTGGGGCCAGGGA…	IGHV2-26*01	IGHD1-26*01	IGHJ4*02	ARIVKWELLSFDY	13	2.34604	ATGGCCTGGGCTCTGCTCCTCCTCAGCCTCCTCACTCAGGGCACAGGATCCTGGGCTCAGTCTGCCCTGACTCAGCCTCGCTCAGTGTCCGGGTCTCCTGGACAGTCAGTCACCATCTCCTGCACTGGAACCAGCAGTGATGTTGGGAGTTATAACCTTGTCTCCTGGTACCAACAACACCCAGGCAAAGCCCCCAAACTCATGATTTATGATGTCAGTAAGCGGCCCTCAGGGGTCCCTGGTCGCTTCTCTGGCTCCAAGTCTGGCAACACGGCCTCCCTGACCATCTCTGGGCTCCAGGCTGAGGATGAGGCTGATTATTACTGCTGCTCATATGCAGGCAGCTACACTTGGGTGTTCGGCGGAGGGACCAAGCTGACCGTCCTAGG	LV2-11	LJ3	CSYAGSYTWV	10	1.81818
c29004	149812	NN	ATGGACACACTTTGCTACACACTCCTGCTGCTGACCACCCCTTCCTGGGTCTTGTCCCAGGTCACCTTGAAGGAGTCTGGTCCTGTACTGGTGAAACCCACAGAGACCCTCACGCTTACCTGCACCGTCTCTGGGTTGCCACTCAACAATGCTAGAATGGGTGTGAGCTGGATCCGTCAGCCCCCAGGGAAGGCCCTGGAGTGGCTTGCACACATTTTTTCGAATGACGAAAAATCCTACAGCACATCTCTGAAGAGCAGGCTCACCATCTCCAAGGACACCTCCAAAAGCCAGGTGGTCCTTACCATGACCAACATGGACCCTGTGGACACAGCCACATATTACTGTGCACGGATCGTAAAGTGGGAATTACTCTCGTTTGACTATTGGGGCCAGGGA…	IGHV2-26*01	IGHD1-26*01	IGHJ4*02	ARIVKWELLSFDY	13	2.34604	ATGGCCTGGGCTCTGCTCCTCCTCAGCCTCCTCACTCAGGGCACAGGATCCTGGGCTCAGTCTGCCCTGACTCAGCCTCGCTCAGTGTCCGGGTCTCCTGGACAGTCAGTCACCATCTCCTGCACTGGAACCAGCAGTGATGTTGGGAGTTATAACCTTGTCTCCTGGTACCAACAACACCCAGGCAAAGCCCCCAAACTCATGATTTATGATGTCAGTAAGCGGCCCTCAGGGGTCCCTGGTCGCTTCTCTGGCTCCAAGTCTGGCAACACGGCCTCCCTGACCATCTCTGGGCTCCAGGCTGAGGATGAGGCTGATTATTACTGCTGCTCATATGCAGGCAGCTACACTTGGGTGTTCGGCGGAGGGACCAAGCTGACCGTCCTAGG	LV2-11	LJ3	CSYAGSYTWV	10	1.81818
c28842	149812	NN	ATGGACACACTTTGCTACACACTCCTGCTGCTGACCACCCCTTCCTGGGTCTTGTCCCAGGTCACCTTGAAGGAGTCTGGTCCTGTACTGGTGAAACCCACAGAGACCCTCACGCTTACCTGCACCGTCTCTGGGTTGCCACTCAACAATGCTAGAATGGGTGTGAGCTGGATCCGTCAGCCCCCAGGGAAGGCCCTGGAGTGGCTTGCACACATTTTTTCGAATGACGAAAAATCCTACAGCACATCTCTGAAGAGCAGGCTCACCATCTCCAAGGACACCTCCAAAAGCCAGGTGGTCCTTACCATGACCAACATGGACCCTGTGGACACAGCCACATATTACTGTGCACGGATCGTAAAGTGGGAATTACTCTCGTTTGACTATTGGGGCCAGGGA…	IGHV2-26*01	IGHD1-26*01	IGHJ4*02	ARIVKWELLSFDY	13	2.34604	ATGGCCTGGGCTCTGCTCCTCCTCAGCCTCCTCACTCAGGGCACAGGATCCTGGGCTCAGTCTGCCCTGACTCAGCCTCGCTCAGTGTCCGGGTCTCCTGGACAGTCAGTCACCATCTCCTGCACTGGAACCAGCAGTGATGTTGGGAGTTATAACCTTGTCTCCTGGTACCAACAACACCCAGGCAAAGCCCCCAAACTCATGATTTATGATGTCAGTAAGCGGCCCTCAGGGGTCCCTGGTCGCTTCTCTGGCTCCAAGTCTGGCAACACGGCCTCCCTGACCATCTCTGGGCTCCAGGCTGAGGATGAGGCTGATTATTACTGCTGCTCATATGCAGGCAGCTACACTTGGGTGTTCGGCGGAGGGACCAAGCTGACCGTCCTAGG	LV2-11	LJ3	CSYAGSYTWV	10	1.81818
c29148	149812	NN	ATGGACACACTTTGCTACACACTCCTGCTGCTGACCACCCCTTCCTGGGTCTTGTCCCAGGTCACCTTGAAGGAGTCTGGTCCTGTACTGGTGAAACCCACAGAGACCCTCACGCTTACCTGCACCGTCTCTGGGTTGCCACTCAACAATGCTAGAATGGGTGTGAGCTGGATCCGTCAGCCCCCAGGGAAGGCCCTGGAGTGGCTTGCACACATTTTTTCGAATGACGAAAAATCCTACAGCACATCTCTGAAGAGCAGGCTCACCATCTCCAAGGACACCTCCAAAAGCCAGGTGGTCCTTACCATGACCAACATGGACCCTGTGGACACAGCCACATATTACTGTGCACGGATCGTAAAGTGGGAATTACTCTCGTTTGACTATTGGGGCCAGGGA…	IGHV2-26*01	IGHD1-26*01	IGHJ4*02	ARIVKWELLSFDY	13	2.34604	ATGGCCTGGGCTCTGCTCCTCCTCAGCCTCCTCACTCAGGGCACAGGATCCTGGGCTCAGTCTGCCCTGACTCAGCCTCGCTCAGTGTCCGGGTCTCCTGGACAGTCAGTCACCATCTCCTGCACTGGAACCAGCAGTGATGTTGGGAGTTATAACCTTGTCTCCTGGTACCAACAACACCCAGGCAAAGCCCCCAAACTCATGATTTATGATGTCAGTAAGCGGCCCTCAGGGGTCCCTGGTCGCTTCTCTGGCTCCAAGTCTGGCAACACGGCCTCCCTGACCATCTCTGGGCTCCAGGCTGAGGATGAGGCTGATTATTACTGCTGCTCATATGCAGGCAGCTACACTTGGGTGTTCGGCGGAGGGACCAAGCTGACCGTCCTAGG	LV2-11	LJ3	CSYAGSYTWV	10	1.81818
c29234	149812	NN	ATGGACACACTTTGCTACACACTCCTGCTGCTGACCACCCCTTCCTGGGTCTTGTCCCAGGTCACCTTGAAGGAGTCTGGTCCTGTACTGGTGAAACCCACAGAGACCCTCACGCTTACCTGCACCGTCTCTGGGTTGCCACTCAACAATGCTAGAATGGGTGTGAGCTGGATCCGTCAGCCCCCAGGGAAGGCCCTGGAGTGGCTTGCACACATTTTTTCGAATGACGAAAAATCCTACAGCACATCTCTGAAGAGCAGGCTCACCATCTCCAAGGACACCTCCAAAAGCCAGGTGGTCCTTACCATGACCAACATGGACCCTGTGGACACAGCCACATATTACTGTGCACGGATCGTAAAGTGGGAATTACTCTCGTTTGACTATTGGGGCCAGGGA…	IGHV2-26*01	IGHD1-26*01	IGHJ4*02	ARIVKWELLSFDY	13	2.34604	ATGGCCTGGGCTCTGCTCCTCCTCAGCCTCCTCACTCAGGGCACAGGATCCTGGGCTCAGTCTGCCCTGACTCAGCCTCGCTCAGTGTCCGGGTCTCCTGGACAGTCAGTCACCATCTCCTGCACTGGAACCAGCAGTGATGTTGGGAGTTATAACCTTGTCTCCTGGTACCAACAACACCCAGGCAAAGCCCCCAAACTCATGATTTATGATGTCAGTAAGCGGCCCTCAGGGGTCCCTGGTCGCTTCTCTGGCTCCAAGTCTGGCAACACGGCCTCCCTGACCATCTCTGGGCTCCAGGCTGAGGATGAGGCTGATTATTACTGCTGCTCATATGCAGGCAGCTACACTTGGGTGTTCGGCGGAGGGACCAAGCTGACCGTCCTAGG	LV2-11	LJ3	CSYAGSYTWV	10	1.81818
c28658	149812	NN	ATGGAGTTTGGGCTGAGCTGGCTTTTTCTTGTGGCTATTTTAAAAGGTGTCCAATGTGAGGTGCAGTTGTTGGAGTCGGGGGGAGGCTTGGCACAGCCTGGGGGGTCCCTGAGACTCTCCTGTGCAGCCTCTGGATTCACCTTTACCAGCTATGCCATGAACTGGGTCCGCCAGGCTCCAGGGAAGGGGCTGGAGTGGGTATCTGGTATTAGTGCTAGTGGCACCAGTGCACACTACGGAGACTCTGTGAAGGGCCGGTTCACCATCTCCAGAGACAATTCCAAGAACACGATGTATTTGCAAATGAACAGCCTGAGAGCCGAGGACACGGCCGTTTATTACTGTGCGAGAAAGACCGGTTGGGTTACAAGTTATTTCTTTGACTTCTGGGGCCAGGGA…	IGHV3-23*01	IGHD3-10*01	IGHJ4*02	ARKTGWVTSYFFDF	14	6.86567	ATGGAAACCCCAGCGCAGCTTCTCTTCCTCCTGCTACTCTGGCTCCCAGAAAGCACCGGAGAAATTGTGTTGACGCAGTCTCCAGGCACCCTGTCTTTGTCTCCAGGGGAAAGAGCCACCCTCTCCTGCAGGGCCAGTCAGAGTGTCAGTAACAACTACTTAGCCTGGTACCAGCAGAAACCTGGCCAGGCTCCCAGGCTCCTCGTCTATGGTGCATCCAGTCGGGCCACTGACATCCCAGACAGGTTCAGTGGTAGTGGGTCTGGGACAGACTTCACTCTCACCATCAGCAGACTGGAGCCTGAAGATTTTGCAGTGTATTACTGTCAGCAGTATGGTACCCCACCCGTAAGTTTTGGCCAGGGGACCAAGCTGGAGATCAAACG	KV3-20	KJ2	QQYGTPPVS	9	3.4375
c29073	149812	NN	ATGGAGTTTGGGCTGAGCTGGCTTTTTCTTGTGGCTATTTTAAAAGGTGTCCAATGTGAGGTGCAGTTGTTGGAGTCGGGGGGAGGCTTGGCACAGCCTGGGGGGTCCCTGAGACTCTCCTGTGCAGCCTCTGGATTCACCTTTACCAGCTATGCCATGAACTGGGTCCGCCAGGCTCCAGGGAAGGGGCTGGAGTGGGTATCTGGTATTAGTGCTAGTGGCACCAGTGCACACTACGGAGACTCTGTGAAGGGCCGGTTCACCATCTCCAGAGACAATTCCAAGAACACGATGTATTTGCAAATGAACAGCCTGAGAGCCGAGGACACGGCCGTTTATTACTGTGCGAGAAAGACCGGTTGGGTTACAAGTTATTTCTTTGACTTCTGGGGCCAGGGA…	IGHV3-23*01	IGHD3-10*01	IGHJ4*02	ARKTGWVTSYFFDF	14	6.86567	ATGGAAACCCCAGCGCAGCTTCTCTTCCTCCTGCTACTCTGGCTCCCAGAAAGCACCGGAGAAATTGTGTTGACGCAGTCTCCAGGCACCCTGTCTTTGTCTCCAGGGGAAAGAGCCACCCTCTCCTGCAGGGCCAGTCAGAGTGTCAGTAACAACTACTTAGCCTGGTACCAGCAGAAACCTGGCCAGGCTCCCAGGCTCCTCGTCTATGGTGCATCCAGTCGGGCCACTGACATCCCAGACAGGTTCAGTGGTAGTGGGTCTGGGACAGACTTCACTCTCACCATCAGCAGACTGGAGCCTGAAGATTTTGCAGTGTATTACTGTCAGCAGTATGGTACCCCACCCGTAAGTTTTGGCCAGGGGACCAAGCTGGAGATCAAACG	KV3-20	KJ2	QQYGTPPVS	9	3.4375
c28838	149812	NN	ATGGAGTTTGGGCTGAGCTGGCTTTTTCTTGTGGCTATTTTAAAAGGTGTCCAATGTGAGGTGCAGTTGTTGGAGTCGGGGGGAGGCTTGGCACAGCCTGGGGGGTCCCTGAGACTCTCCTGTGCAGCCTCTGGATTCACCTTTACCAGCTATGCCATGAACTGGGTCCGCCAGGCTCCAGGGAAGGGGCTGGAGTGGGTATCTGGTATTAGTGCTAGTGGCACCAGTGCACACTACGGAGACTCTGTGAAGGGCCGGTTCACCATCTCCAGAGACAATTCCAAGAACACGATGTATTTGCAAATGAACAGCCTGAGAGCCGAGGACACGGCCGTTTATTACTGTGCGAGAAAGACCGGTTGGGTTACAAGTTATTTCTTTGACTTCTGGGGCCAGGGA…	IGHV3-23*01	IGHD3-10*01	IGHJ4*02	ARKTGWVTSYFFDF	14	6.86567	ATGGAAACCCCAGCGCAGCTTCTCTTCCTCCTGCTACTCTGGCTCCCAGAAAGCACCGGAGAAATTGTGTTGACGCAGTCTCCAGGCACCCTGTCTTTGTCTCCAGGGGAAAGAGCCACCCTCTCCTGCAGGGCCAGTCAGAGTGTCAGTAACAACTACTTAGCCTGGTACCAGCAGAAACCTGGCCAGGCTCCCAGGCTCCTCGTCTATGGTGCATCCAGTCGGGCCACTGACATCCCAGACAGGTTCAGTGGTAGTGGGTCTGGGACAGACTTCACTCTCACCATCAGCAGACTGGAGCCTGAAGATTTTGCAGTGTATTACTGTCAGCAGTATGGTACCCCACCCGTAAGTTTTGGCCAGGGGACCAAGCTGGAGATCAAACG	KV3-20	KJ2	QQYGTPPVS	9	3.4375
c28715	149812	NN	ATGGAGTTTGGGCTGAGCTGGCTTTTTCTTGTGGCTATTTTAAAAGGTGTCCAATGTGAGGTGCAGTTGTTGGAGTCGGGGGGAGGCTTGGCACAGCCTGGGGGGTCCCTGAGACTCTCCTGTGCAGCCTCTGGATTCACCTTTACCAGCTATGCCATGAACTGGGTCCGCCAGGCTCCAGGGAAGGGGCTGGAGTGGGTATCTGGTATTAGTGCTAGTGGCACCAGTGCACACTACGGAGACTCTGTGAAGGGCCGGTTCACCATCTCCAGAGACAATTCCAAGAACACGATGTATTTGCAAATGAACAGCCTGAGAGCCGAGGACACGGCCGTTTATTACTGTGCGAGAAAGACCGGTTGGGTTACAAGTTATTTCTTTGACTTCTGGGGCCAGGGA…	IGHV3-23*01	IGHD3-10*01	IGHJ4*02	ARKTGWVTSYFFDF	14	6.86567	ATGGAAACCCCAGCGCAGCTTCTCTTCCTCCTGCTACTCTGGCTCCCAGAAAGCACCGGAGAAATTGTGTTGACGCAGTCTCCAGGCACCCTGTCTTTGTCTCCAGGGGAAAGAGCCACCCTCTCCTGCAGGGCCAGTCAGAGTGTCAGTAACAACTACTTAGCCTGGTACCAGCAGAAACCTGGCCAGGCTCCCAGGCTCCTCGTCTATGGTGCATCCAGTCGGGCCACTGACATCCCAGACAGGTTCAGTGGTAGTGGGTCTGGGACAGACTTCACTCTCACCATCAGCAGACTGGAGCCTGAAGATTTTGCAGTGTATTACTGTCAGCAGTATGGTACCCCACCCGTAAGTTTTGGCCAGGGGACCAAGCTGGAGATCAAACG	KV3-20	KJ2	QQYGTPPVS	9	3.4375
c29155	149812	NN	ATGGAGTTTGGGCTGAGCTGGCTTTTTCTTGTGGCTATTTTAAAAGGTGTCCAATGTGAGGTGCAGTTGTTGGAGTCGGGGGGAGGCTTGGCACAGCCTGGGGGGTCCCTGAGACTCTCCTGTGCAGCCTCTGGATTCACCTTTACCAGCTATGCCATGAACTGGGTCCGCCAGGCTCCAGGGAAGGGGCTGGAGTGGGTATCTGGTATTAGTGCTAGTGGCACCAGTGCACACTACGGAGACTCTGTGAAGGGCCGGTTCACCATCTCCAGAGACAATTCCAAGAACACGATGTATTTGCAAATGAACAGCCTGAGAGCCAAGGACACGGCCGTTTATTACTGTGCGAGAAAGACCGGTTGGGTTACAAGTTATTTCTTTGACTTCTGGGGCCAGGGA…	IGHV3-23*01	IGHD3-10*01	IGHJ4*02	ARKTGWVTSYFFDF	14	7.16418	ATGGAAACCCCAGCGCAGCTTCTCTTCCTCCTGCTACTCTGGCTCCCAGAAAGCACCGGAGAAATTGTGTTGACGCAGTCTCCAGGCACCCTGTCTTTGTCTCCAGGGGAAAGAGCCACCCTCTCCTGCAGGGCCAGTCAGAGTGTCAGTAACAACTACTTAGCCTGGTACCAGCAGAAACCTGGCCAGGCTCCCAGGCTCCTCGTCTATGGTGCATCCAGTCGGGCCACTGACATCCCAGACAGGTTCAGTGGTAGTGGGTCTGGGACAGACTTCACTCTCACCATCAGCAGACTGGAGCCTGAAGATTTTGCAGTGTATTACTGTCAGCAGTATGGTACCCCACCCGTAAGTTTTGGCCAGGGGACCAAGCTGGAGATCAAACG	KV3-20	KJ2	QQYGTPPVS	9	3.4375
c29006	149812	NN	ATGGAGTTTGGGCTGAGTTGGATTTTCCTTGCTGCTATTTTAAAAGGTGTCCAGTGTGAGGTGCAACTGGTGGAGTCTGGGGGAGGCTTGGTAAAGCCGGGGGGGTCCCTTAGACTCTCCTGTGCAGCCTCTGGATTCACTTTCACTAACGCCTGGATGAGCTGGCTCCGCCAGGTTCCAGGGAAGGGGCTGGAGTGGGTTGGCCGTATTAAAAGCAAACGTCATGGTGGGACAGCAGACTACGCCGCACCCGTGAAAGGCAGATTCACCATGTCAAGAGATGATTCAGAAAACACGCTGTATCTGCAAATGAACAGCCTGAAGACCGGGGACACAGCCGTGTATTACTGTACCACAGGGTCGTTGACTACGCTGACGCACGCGGAAGACCACTGGGGC…	IGHV3-15*01	IGHD4-17*01	IGHJ5*02	TTGSLTTLTHAEDH	14	4.45104	ATGGCCTGGGCTCTGCTATTCCTCACCCTCCTCACTCAGGGCACAGGGTCCTGGGCCCAGTCTGCCCTGACTCAGCCTGCCTCCGTGTCTGGGTCTCCTGGACAGTCGATCACCATCTCCTGCACTGAAACCACCAGTGACTATGTCTCCTGGTACCAACAACACCCAGGCAAAGCCCCCAAACTCATAATTTATGCTGTCAGTAGTCGGCCCTCAGGGGTTTCTACTCGCTTCTCTGGCTCCAAGTCTGGCAGCACGGCCTCCCTGACCATCTCTGGCCTCCAGGCTGAGGACGAGGCTGATTATCACTGCAGCTCATATACAGGCACCTCTCCCCCCTTCCTATTCGGCGGAGGGACCAAGCTTATCGTCCTAGG	LV2-14	LJ2	SSYTGTSPPFL	11	4.62046
c28947	149812	NN	ATGGAGTTTGGGCTGAGTTGGATTTTCCTTGCTGCTATTTTAAAAGGTGTCCAGTGTGAGGTGCAACTGGTGGAGTCTGGGGGAGGCTTGGTAAAGCCGGGGGGGTCCCTTAGACTCTCCTGTGCAGCCTCTGGATTCACTTTCACTAACGCCTGGATGAGCTGGCTCCGCCAGGTTCCAGGGAAGGGGCTGGAGTGGGTTGGCCGTATTAAAAGCAAACGTCATGGTGGGACAGCAGACTACGCCGCACCCGTGAAAGGCAGATTCACCATGTCAAGAGATGATTCAGAAAACACGCTGTATCTGCAAATGAACAGCCTGAAGACCGGGGACACAGCCGTGTATTACTGTACCACAGGGTCGTTGACTACGCTGACGCACGCGGAAGACCACTGGGGC…	IGHV3-15*01	IGHD4-17*01	IGHJ5*02	TTGSLTTLTHAEDH	14	4.45104	ATGGCCTGGGCTCTGCTATTCCTCACCCTCCTCACTCAGGGCACAGGGTCCTGGGCCCAGTCTGCCCTGACTCAGCCTGCCTCCGTGTCTGGGTCTCCTGGACAGTCGATCACCATCTCCTGCACTGAAACCACCAGTGACTATGTCTCCTGGTACCAACAACACCCAGGCAAAGCCCCCAAACTCATAATTTATGCTGTCAGTAGTCGGCCCTCAGGGGTTTCTACTCGCTTCTCTGGCTCCAAGTCTGGCAGCACGGCCTCCCTGACCATCTCTGGCCTCCAGGCTGAGGACGAGGCTGATTATCACTGCAGCTCATATACAGGCACCTCTCCCCCCTTCCTATTCGGCGGAGGGACCAAGCTTATCGTCCTAGG	LV2-14	LJ2	SSYTGTSPPFL	11	4.62046
c28773	149812	NN	ATGACGGAGTTTGGGCTGAGCTGGGTTTTCCTTGTTGCTATTTTTAAAGGTGTCCAGTGTGAGGTGCAGCTGGTGGAGTCTGGGGGAGGCTTGGCCCAGCCTGGGGGGTCCCTGAGACTCTCCTGTGCAGCCTCTGGATTCAGTTTAAGTAGGCATGCTATGCACTGGGTCCGCCAGGCTCCAGGGAAGGGACTGGAATATGTTTCAGGTATTGGTAGTAATGGGGTCAGCACACATTATGCAAACTCTGTGAAGGGCAGATTCACCGTCTCCAGAGACAGCTCCAAGAACACGCTGTATCTTCAAATGGGCAGCCTGAGAGCTGAGGACATGGCTGTGTATTACTGTGGGAGAGATAAACTTGGCAGTGGCTGGTCCGAGATTGACCTGTGGGGCCAG…	IGHV3-64*01	IGHD6-19*01	IGHJ4*02	GRDKLGSGWSEIDL	14	4.55927	ATGGTGTTGCAGACCCAGGTCTTCATTTCTCTGTTGCTCTGGATCTCTGGTGCCTACGGGGACATCGTGATGACCCAGTCTCCAGACTCCCTGGCTGTGTCTCTGGGCGAGAGGGCCACCATCAACTGCAAGTCCAGCCAGAGTGTTTTAAACAGCTCCAACAATAAGAACTGCTTAGCTTGGTACCAGCAGAAACCAGGACAGCCTCCTAAGTTGCTCATTTACTGGGCATCTACCCGGGAATCCGGGGTTCCTGACCGATTCAGTGGCAGCGGGTCTGGGACAGATTTCACGCTCACCATCAGCAGCCTGCAGGCTGAAGATGTGGCAGTTTATTACTGTCAGCAGCATTATAATACTCCTCCGTACACTTTTGGCCAGGGGACCAAGCTGGAGATC…	KV4-1	KJ2	QQHYNTPPYT	10	2.33918
c29190	149812	NN	ATGGATCTCACGTGCGAGAAAATGAAGCACCTGTGGTTCTTCCTCCTGCTGGTGGCGGCTCCCAGATGGGTCCTGTCCCTACTGCAGCTGCAGGAGTCGGGCCCAGGACTGGTGAAGTCTTCGGAGACCCTGTCCGTCACCTGCACTGTCTCTGGTGGCTCCATCAGTAGTAGTAGTTATTATTGGGGCTGGATCCGCCAGTCCCCAGGGAGGGGGCTGGAGTGGATTGGGAGTGTCTATTATCGTGGGACCACCAATTACAAACCGCCCCTCAAGAGTCGACTCACCATGTTCGTAGACACGTCCAAGAACCTGTTCTCCCTGAACCTGAGCTCTGTGACCGCCTCGGACACGGCTATATATTACTGTGCGAGACAAAGGACTGTTTCAGTGGGTGGA…	IGHV4-39*01	IGHD1-26*01	IGHJ3*02	ARQRTVSVGGGFDI	14	7.37463	ATGGAAACCCCAGCGCAGCTTCTCTTCCTCCTGCTACTCTGGCTCCCAGATACCACCGGCGAAATTGTATTGACGCAGTCTCCAGGCACCCTGTCTTTGTCTCCAGGGGAAAGAGCCACCCTCTCCTGCAGGGCCAGTGAGAGTGTTAGCACCTTCTTAGCCTGGTACCAACAAAAACCTGGCCAGGCTCCCAGGCTCGTCATTTCTGGTGCATCCAGTAGGGCCACGGGCATCCCAGACAGGTTCAGTGGCAGTGGGTCTGGGGCAGACTTCACTCTTACGATCAACAGACTGGAGCCTGAAGATTTTGCAGTGTATTTCTGTCAGCTGTATGATAGGTCACCCCTCCACCCGATCACCTTCGGCCAAGGGACACGACTGGAGATTAAACG	KV3-20	KJ5	QLYDRSPLHPIT	12	5.919
c28806	149812	NN	ATGGATCTCACGTGCGAGAAAATGAAGCACCTGTGGTTCTTCCTCCTGCTGGTGGCGGCTCCCAGATGGGTCCTGTCCCTACTGCAGCTGCAGGAGTCGGGCCCAGGACTGGTGAAGTCTTCGGAGACCCTGTCCGTCACCTGCACTGTCTCTGGTGGCTCCATCAGTAGTAGTAGTTATTATTGGGGCTGGATCCGCCAGTCCCCAGGGAGGGGGCTGGAGTGGATTGGGAGTGTCTATTATCGTGGGACCACCAATTACAAACCGCCCCTCAAGAGTCGACTCACCATGTTCGTAGACACGTCCAAGAACCTGTTCTCCCTGAACCTGAGCTCTGTGACCGCCTCGGACACGGCTATATATTACTGTGCGAGACAAAGGACTGTTTCAGTGGGTGGA…	IGHV4-39*01	IGHD1-26*01	IGHJ3*02	ARQRTVSVGGGFDI	14	7.37463	ATGGAAACCCCAGCGCAGCTTCTCTTCCTCCTGCTACTCTGGCTCCCAGATACCACCGGCGAAATTGTATTGACGCAGTCTCCAGGCACCCTGTCTTTGTCTCCAGGGGAAAGAGCCACCCTCTCCTGCAGGGCCAGTGAGAGTGTTAGCACCTTCTTAGCCTGGTACCAACAAAAACCTGGCCAGGCTCCCAGGCTCGTCATTTCTGGTGCATCCAGTAGGGCCACGGGCATCCCAGACAGGTTCAGTGGCAGTGGGTCTGGGGCAGACTTCACTCTTACGATCAACAGACTGGAGCCTGAAGATTTTGCAGTGTATTTCTGTCAGCTGTATGATAGGTCACCCCTCCACCCGATCACCTTCGGCCAAGGGACACGACTGGAGATTAAACG	KV3-20	KJ5	QLYDRSPLHPIT	12	5.919
c29040	149812	NN	ATGGAGTTTGGGCTGAGCTGGGTTTTCCTCGTTGCTCTTTTAAGAGGTGTCCAGTGTCAGGTGCAGCTGGTGGAGTCTGGGGGAGGCGTGGTCCAGCCTGGGAGGTCCCTCAGACTCTCCTGTGCAGCGTCTCGATTCACATTCAGTGACTATGCCATGCACTGGGTCCGCCAGGCTCCAGGCAAGGGACTGGAACACGTGGCAGTTATTTGGTACGACGGAAGTAATAAATTTTATGCAGACTCTTTAAGGGGCCGCTTCACCATCTCCAGAGACAATTCCAAGAACACAGTGTTTCTGCAAATGACCAGTCTGAGAGGCGAAGACACGGCTGTTTATTACTGTGCGAGGGGCACGGTGGGCGGCTCCTTTGACCACTGGGGCCAGGGAACGCTGGTC…	IGHV3-33*01	IGHD4-23*01	IGHJ4*02	ARGTVGGSFDH	11	9.22619	ATGGACATGAGGGTCCCCGCTCAGCTCCTGGGGCTCCTGCTACTCTGGCTCCGAGGTGCCAGATGTGACATCCAGATGACCCAGTCTCCATCCTCCCTGTCTGCATCTGTGGGAGACAGGGTCATCATCACTTGCCGGGCAAGTCAGAATATTAACAGCAACTTAAATTGGTATCAACAAAAACCAGGGAAAGCCCCTCACCTCCTGATCTATGCTGCGTCCACTTTGCAAGGTGGGGTCCCGTCAAGGTTCAGTGGCAGTGCGTCTGGGACAGAGTTCACCCTCACCATCAGCAGTCTGCAACCTGAAGACTTTGCAACTTACTACTGTCAACAGAGTTATACTGTTCCTCCGTACACTTTTGGCCAGGGGACCAAGGTGGACATCAAACG	KV1-39	KJ2	QQSYTVPPYT	10	8.64198
c29167	149812	NN	ATGGACTGGACCTGGAGGATCCTCTTCTTGGTGGCAGCAGCTACAGGAGCCCACTCCCAGGTGCAGCTGGTGCAGTCTGGGGCTGAGGTGAAGAAGCCTGGGGCCTCAGTGAAGGTCTCCTGCAAGGCTTCTGGATACACCTTCACCAGTTATGATATCAACTGGGTGCGACAGGCCACTGGACAAGGACTTGAGTGGATGGGATGGATGAATTCTAACAATGGTAGGACAGGCTATGCACAGAAGTTCCAGGACAGAGTCACCATGACCAGGATAACCTCCATAGGCACAGCCTACATGGAGCTGAGCAGCCTGACATCGGAGGACACGGCCGTGTATTACTGTGCGAGAGGCAAGTGGGAGATACCAGATGACAACTGGGGCCAGGGAACCCTGGTC…	IGHV1-8*01	IGHD1-26*01	IGHJ4*02	ARGKWEIPDDN	11	3.86905	ATTTAGATTACATGGTTGACTTTTCTGTTTTATTTCCAATCTCAGATACCACCGGAGAAACTGTGTTGACGCAGTCTCCAGGCACCCTGTCTTTGTCTCCAGGGGAAAGAGCCACCCTCTCCTGCAGGGCCAGTCAGAGTGTTAGTAGCAACTCCTTAGCCTGGTACCAGCAGAAACCTGGCCAGGCTCCCAGGCTCCTCATCTCTGGTGCATCCAGCAGGGCCGCTGGCATCCCAGACAGGTTCAGTGGCAGTGGGTCTGGGACAGACTTCACTCTCACCATCAGCAGACTGGAGCCTGAAGATTTTGCAGTGTATTACTGTCAGCAGTATGGTAGTTCCCGGACGTTCGGCCAAGGGACCAAGGTGGAAATCAAACG	KV3-20	KJ1	QQYGSSRT	8	2.19436
c28757	149812	NN	ATGGACTGGACCTGGAGGATCCTCTTCTTGGTGGCAGCAGCTACAGGAGCCCACTCCCAGGTGCAGCTGGTGCAGTCTGGGGCTGAGGTGAAGAAGCCTGGGGCCTCAGTGAAGGTCTCCTGCAAGGCTTCTGGATACACCTTCACCAGTTATGATATCAACTGGGTGCGACAGGCCACTGGACAAGGACTTGAGTGGATGGGATGGATGAATTCTAACAATGGTAGGACAGGCTATGCACAGAAGTTCCAGGACAGAGTCACCATGACCAGGATAACCTCCATAGGCACAGCCTACATGGAGCTGAGCAGCCTGACATCGGAGGACACGGCCGTGTATTACTGTGCGAGAGGCAAGTGGGAGATACCAGATGACAACTGGGGCCAGGGAACCCTGGTC…	IGHV1-8*01	IGHD1-26*01	IGHJ4*02	ARGKWEIPDDN	11	3.86905	ATGGAAACCCCAGCGCAGCTTCTCTTCCTCCTGCTACTCTGGCTCCCAGATACCACCGGAGAAACTGTGTTGACGCAGTCTCCAGGCACCCTGTCTTTGTCTCCAGGGGAAAGAGCCACCCTCTCCTGCAGGGCCAGTCAGAGTGTTAGTAGCAACTCCTTAGCCTGGTACCAGCAGAAACCTGGCCAGGCTCCCAGGCTCCTCATCTCTGGTGCATCCAGCAGGGCCGCTGGCATCCCAGACAGGTTCAGTGGCAGTGGGTCTGGGACAGACTTCACTCTCACCATCAGCAGACTGGAGCCTGAAGATTTTGCAGTGTATTACTGTCAGCAGTATGGTAGTTCCCGGACGTTCGGCCAAGGGACCAAGGTGGAAATCAAACG	KV3-20	KJ1	QQYGSSRT	8	2.19436
c28993	149812	NN	ATGGACTGGACCTGGAGGATCCTCTTCTTGGTGGCAGCAGCTACAGGAGCCCACTCCCAGGTGCAGCTGGTGCAGTCTGGGGCTGAGGTGAAGAAGCCTGGGGCCTCAGTGAAGGTCTCCTGCAAGGCTTCTGGATACACCTTCACCAGTTATGATATCAACTGGGTGCGACAGGCCACTGGACAAGGACTTGAGTGGATGGGATGGATGAATTCTAACAATGGTAGGACAGGCTATGCACAGAAGTTCCAGGACAGAGTCACCATGACCAGGATAACCTCCATAGGCACAGCCTACATGGAGCTGAGCAGCCTGACATCGGAGGACACGGCCGTGTATTACTGTGCGAGAGGCAAGTGGGAGATACCAGATGACAACTGGGGCCAGGGAACCCTGGTC…	IGHV1-8*01	IGHD1-26*01	IGHJ4*02	ARGKWEIPDDN	11	3.86905	ATGGAAACCCCAGCGCAGCTTCTCTTCCTCCTGCTACTCTGGCTCCCAGATACCACCGGAGAAACTGTGTTGACGCAGTCTCCAGGCACCCTGTCTTTGTCTCCAGGGGAAAGAGCCACCCTCTCCTGCAGGGCCAGTCAGAGTGTTAGTAGCAACTCCTTAGCCTGGTACCAGCAGAAACCTGGCCAGGCTCCCAGGCTCCTCATCTCTGGTGCATCCAGCAGGGCCGCTGGCATCCCAGACAGGTTCAGTGGCAGTGGGTCTGGGACAGACTTCACTCTCACCATCAGCAGACTGGAGCCTGAAGATTTTGCAGTGTATTACTGTCAGCAGTATGGTAGTTCCCGGACGTTCGGCCAAGGGACCAAGGTGGAAATCAAACG	KV3-20	KJ1	QQYGSSRT	8	2.19436
c28805	149812	NN	ATGGACTGGACCTGGAGGATCCTCTTCTTGGTGGCAGCAGCTACAGGAGCCCACTCCCAGGTGCAGCTGGTGCAGTCTGGGGCTGAGGTGAAGAAGCCTGGGGCCTCAGTGAAGGTCTCCTGCAAGGCTTCTGGATACACCTTCACCAGTTATGATATCAACTGGGTGCGACAGGCCACTGGACAAGGACTTGAGTGGATGGGATGGATGAATTCTAACAATGGTAGGACAGGCTATGCACAGAAGTTCCAGGACAGAGTCACCATGACCAGGATAACCTCCATAGGCACAGCCTACATGGAGCTGAGCAGCCTGACATCGGAGGACACGGCCGTGTATTACTGTGCGAGAGGCAAGTGGGAGATACCAGATGACAACTGGGGCCAGGGAACCCTGGTC…	IGHV1-8*01	IGHD1-26*01	IGHJ4*02	ARGKWEIPDDN	11	3.86905	ATGGAAACCCCAGCGCAGCTTCTCTTCCTCCTGCTACTCTGGCTCCCAGATACCACCGGAGAAACTGTGTTGACGCAGTCTCCAGGCACCCTGTCTTTGTCTCCAGGGGAAAGAGCCACCCTCTCCTGCAGGGCCAGTCAGAGTGTTAGTAGCAACTCCTTAGCCTGGTACCAGCAGAAACCTGGCCAGGCTCCCAGGCTCCTCATCTCTGGTGCATCCAGCAGGGCCGCTGGCATCCCAGACAGGTTCAGTGGCAGTGGGTCTGGGACAGACTTCACTCTCACCATCAGCAGACTGGAGCCTGAAGATTTTGCAGTGTATTACTGTCAGCAGTATGGTAGTTCCCGGACGTTCGGCCAAGGGACCAAGGTGGAAATCAAACG	KV3-20	KJ1	QQYGSSRT	8	2.19436
c28878	149812	NN	ATGGACTGGACCTGGAGGATCCTCTTCTTGGTGGCAGCAGCTACAGGAGCCCACTCCCAGGTGCAGCTGGTGCAGTCTGGGGCTGAGGTGAAGAAGCCTGGGGCCTCAGTGAAGGTCTCCTGCAAGGCTTCTGGATACACCTTCACCAGTTATGATATCAACTGGGTGCGACAGGCCACTGGACAAGGACTTGAGTGGATGGGATGGATGAATTCTAACAATGGTAGGACAGGCTATGCACAGAAGTTCCAGGACAGAGTCACCATGACCAGGATAACCTCCATAGGCACAGCCTACATGGAGCTGAGCAGCCTGACATCGGAGGACACGGCCGTGTATTACTGTGCGAGAGGCAAGTGGGAGATACCAGATGACAACTGGGGCCAGGGAACCCTGGTC…	IGHV1-8*01	IGHD1-26*01	IGHJ4*02	ARGKWEIPDDN	11	3.86905	ATGGAAACCCCAGCGCAGCTTCTCTTCCTCCTGCTACTCTGGCTCCCAGATACCACCGGAGAAACTGTGTTGACGCAGTCTCCAGGCACCCTGTCTTTGTCTCCAGGGGAAAGAGCCACCCTCTCCTGCAGGGCCAGTCAGAGTGTTAGTAGCAACTCCTTAGCCTGGTACCAGCAGAAACCTGGCCAGGCTCCCAGGCTCCTCATCTCTGGTGCATCCAGCAGGGCCGCTGGCATCCCAGACAGGTTCAGTGGCAGTGGGTCTGGGACAGACTTCACTCTCACCATCAGCAGACTGGAGCCTGAAGATTTTGCAGTGTATTACTGTCAGCAGTATGGTAGTTCCCGGACGTTCGGCCAAGGGACCAAGGTGGAAATCAAACG	KV3-20	KJ1	QQYGSSRT	8	2.19436
c28820	149812	NN	ATGGACTGGACCTGGAGGATCCTCTTCTTGGTGGCAGCAGCTACAGGAGCCCACTCCCAGGTGCAGCTGGTGCAGTCTGGGGCTGAGGTGAAGAAGCCTGGGGCCTCAGTGAAGGTCTCCTGCAAGGCTTCTGGATACACCTTCACCAGTTATGATATCAACTGGGTGCGACAGGCCACTGGACAAGGACTTGAGTGGATGGGATGGATGAATTCTAACAATGGTAGGACAGGCTATGCACAGAAGTTCCAGGACAGAGTCACCATGACCAGGATAACCTCCATAGGCACAGCCTACATGGAGCTGAGCAGCCTGACATCGGAGGACACGGCCGTGTATTACTGTGCGAGAGGCAAGTGGGAGATACCAGATGACAACTGGGGCCAGGGAACCCTGGTC…	IGHV1-8*01	IGHD1-26*01	IGHJ4*02	ARGKWEIPDDN	11	3.86905	ATGGAAACCCCAGCGCAGCTTCTCTTCCTCCTGCTACTCTGGCTCCCAGATACCACCGGAGAAACTGTGTTGACGCAGTCTCCAGGCACCCTGTCTTTGTCTCCAGGGGAAAGAGCCACCCTCTCCTGCAGGGCCAGTCAGAGTGTTAGTAGCAACTCCTTAGCCTGGTACCAGCAGAAACCTGGCCAGGCTCCCAGGCTCCTCATCTCTGGTGCATCCAGCAGGGCCGCTGGCATCCCAGACAGGTTCAGTGGCAGTGGGTCTGGGACAGACTTCACTCTCACCATCAGCAGACTGGAGCCTGAAGATTTTGCAGTGTATTACTGTCAGCAGTATGGTAGTTCCCGGACGTTCGGCCAAGGGACCAAGGTGGAAATCAAACG	KV3-20	KJ1	QQYGSSRT	8	2.19436
c29101	149812	NN	ATGGACTGGACCTGGAGGATCCTCTTCTTGGTGGCAGCAGCTACAGGAGCCCACTCCCAGGTGCAGCTGGTGCAGTCTGGGGCTGAGGTGAAGAAGCCTGGGGCCTCAGTGAAGGTCTCCTGCAAGGCTTCTGGATACACCTTCACCAGTTATGATATCAACTGGGTGCGACAGGCCACTGGACAAGGACTTGAGTGGATGGGATGGATGAATTCTAACAATGGTAGGACAGGCTATGCACAGAAGTTCCAGGACAGAGTCACCATGACCAGGATAACCTCCATAGGCACAGCCTACATGGAGCTGAGCAGCCTGACATCGGAGGACACGGCCGTGTATTACTGTGCGAGAGGCAAGTGGGAGATACCAGATGACAACTGGGGCCAGGGAACCCTGGTC…	IGHV1-8*01	IGHD1-26*01	IGHJ4*02	ARGKWEIPDDN	11	3.86905	ATGGAAACCCCAGCGCAGCTTCTCTTCCTCCTGCTACTCTGGCTCCCAGATACCACCGGAGAAACTGTGTTGACGCAGTCTCCAGGCACCCTGTCTTTGTCTCCAGGGGAAAGAGCCACCCTCTCCTGCAGGGCCAGTCAGAGTGTTAGTAGCAACTCCTTAGCCTGGTACCAGCAGAAACCTGGCCAGGCTCCCAGGCTCCTCATCTCTGGTGCATCCAGCAGGGCCGCTGGCATCCCAGACAGGTTCAGTGGCAGTGGGTCTGGGACAGACTTCACTCTCACCATCAGCAGACTGGAGCCTGAAGATTTTGCAGTGTATTACTGTCAGCAGTATGGTAGTTCCCGGACGTTCGGCCAAGGGACCAAGGTGGAAATCAAACG	KV3-20	KJ1	QQYGSSRT	8	2.19436
c28951	149812	NN	ATGGACTGGACCTGGAGGATCCTCTTCTTGGTGGCAGCAGCTACAGGAGCCCACTCCCAGGTGCAGCTGGTGCAGTCTGGGGCTGAGGTGAAGAAGCCTGGGGCCTCAGTGAAGGTCTCCTGCAAGGCTTCTGGATACACCTTCACCAGTTATGATATCAACTGGGTGCGACAGGCCACTGGACAAGGACTTGAGTGGATGGGATGGATGAATTCTAACAATGGTAGGACAGGCTATGCACAGAAGTTCCAGGACAGAGTCACCATGACCAGGATAACCTCCATAGGCACAGCCTACATGGAGCTGAGCAGCCTGACATCGGAGGACACGGCCGTGTATTACTGTGCGAGAGGCAAGTGGGAGATACCAGATGACAACTGGGGCCAGGGAACCCTGGTC…	IGHV1-8*01	IGHD1-26*01	IGHJ4*02	ARGKWEIPDDN	11	3.86905	ATGGAAACCCCAGCGCAGCTTCTCTTCCTCCTGCTACTCTGGCTCCCAGATACCACCGGAGAAACTGTGTTGACGCAGTCTCCAGGCACCCTGTCTTTGTCTCCAGGGGAAAGAGCCACCCTCTCCTGCAGGGCCAGTCAGAGTGTTAGTAGCAACTCCTTAGCCTGGTACCAGCAGAAACCTGGCCAGGCTCCCAGGCTCCTCATCTCTGGTGCATCCAGCAGGGCCGCTGGCATCCCAGACAGGTTCAGTGGCAGTGGGTCTGGGACAGACTTCACTCTCACCATCAGCAGACTGGAGCCTGAAGATTTTGCAGTGTATTACTGTCAGCAGTATGGTAGTTCCCGGACGTTCGGCCAAGGGACCAAGGTGGAAATCAAACG	KV3-20	KJ1	QQYGSSRT	8	2.19436
c29210	149812	NN	ATGGACTGGACCTGGAGGATCCTCTTCTTGGTGGCAGCAGCTACAGGAGCCCACTCCCAGGTGCAGCTGGTGCAGTCTGGGGCTGAGGTGAAGAAGCCTGGGGCCTCAGTGAAGGTCTCCTGCAAGGCTTCTGGATACACCTTCACCAGTTATGATATCAACTGGGTGCGACAGGCCACTGGACAAGGACTTGAGTGGATGGGATGGATGAATTCTAACAATGGTAGGACAGGCTATGCACAGAAGTTCCAGGACAGAGTCACCATGACCAGGATAACCTCCATAGGCACAGCCTACATGGAGCTGAGCAGCCTGACATCGGAGGACACGGCCGTGTATTACTGTGCGAGAGGCAAGTGGGAGATACCAGATGACAACTGGGGCCAGGGAACCCTGGTC…	IGHV1-8*01	IGHD1-26*01	IGHJ4*02	ARGKWEIPDDN	11	3.86905	ATGGAAACCCCAGCGCAGCTTCTCTTCCTCCTGCTACTCTGGCTCCCAGATACCACCGGAGAAACTGTGTTGACGCAGTCTCCAGGCACCCTGTCTTTGTCTCCAGGGGAAAGAGCCACCCTCTCCTGCAGGGCCAGTCAGAGTGTTAGTAGCAACTCCTTAGCCTGGTACCAGCAGAAACCTGGCCAGGCTCCCAGGCTCCTCATCTCTGGTGCATCCAGCAGGGCCGCTGGCATCCCAGACAGGTTCAGTGGCAGTGGGTCTGGGACAGACTTCACTCTCACCATCAGCAGACTGGAGCCTGAAGATTTTGCAGTGTATTACTGTCAGCAGTATGGTAGTTCCCGGACGTTCGGCCAAGGGACCAAGGTGGAAATCAAACG	KV3-20	KJ1	QQYGSSRT	8	2.19436
c28837	149812	NN	ATGGACTGGACCTGGAGGATCCTCTTCTTGGTGGCAGCAGCTACAGGAGCCCACTCCCAGGTGCAGCTGGTGCAGTCTGGGGCTGAGGTGAAGAAGCCTGGGGCCTCAGTGAAGGTCTCCTGCAAGGCTTCTGGATACACCTTCACCAGTTATGATATCAACTGGGTGCGACAGGCCACTGGACAAGGACTTGAGTGGATGGGATGGATGAATTCTAACAATGGTAGGACAGGCTATGCACAGAAGTTCCAGGACAGAGTCACCATGACCAGGATAACCTCCATAGGCACAGCCTACATGGAGCTGAGCAGCCTGACATCGGAGGACACGGCCGTGTATTACTGTGCGAGAGGCAAGTGGGAGATACCAGATGACAACTGGGGCCAGGGAACCCTGGTC…	IGHV1-8*01	IGHD1-26*01	IGHJ4*02	ARGKWEIPDDN	11	3.86905	ATGGAAACCCCAGCGCAGCTTCTCTTCCTCCTGCTACTCTGGCTCCCAGATACCACCGGAGAAACTGTGTTGACGCAGTCTCCAGGCACCCTGTCTTTGTCTCCAGGGGAAAGAGCCACCCTCTCCTGCAGGGCCAGTCAGAGTGTTAGTAGCAACTCCTTAGCCTGGTACCAGCAGAAACCTGGCCAGGCTCCCAGGCTCCTCATCTCTGGTGCATCCAGCAGGGCCGCTGGCATCCCAGACAGGTTCAGTGGCAGTGGGTCTGGGACAGACTTCACTCTCACCATCAGCAGACTGGAGCCTGAAGATTTTGCAGTGTATTACTGTCAGCAGTATGGTAGTTCCCGGACGTTCGGCCAAGGGACCAAGGTGGAAATCAAACG	KV3-20	KJ1	QQYGSSRT	8	2.19436
c28825	149812	NN	ATGGACTGGACCTGGAGGATCCTCTTCTTGGTGGCAGCAGCTACAGGAGCCCACTCCCAGGTGCAGCTGGTGCAGTCTGGGGCTGAGGTGAAGAAGCCTGGGGCCTCAGTGAAGGTCTCCTGCAAGGCTTCTGGATACACCTTCACCAGTTATGATATCAACTGGGTGCGACAGGCCACTGGACAAGGACTTGAGTGGATGGGATGGATGAATTCTAACAATGGTAGGACAGGCTATGCACAGAAGTTCCAGGACAGAGTCACCATGACCAGGATAACCTCCATAGGCACAGCCTACATGGAGCTGAGCAGCCTGACATCGGAGGACACGGCCGTGTATTACTGTGCGAGAGGCAAGTGGGAGATACCAGATGACAACTGGGGCCAGGGAACCCTGGTC…	IGHV1-8*01	IGHD1-26*01	IGHJ4*02	ARGKWEIPDDN	11	3.86905	ATGGAAACCCCAGCGCAGCTTCTCTTCCTCCTGCTACTCTGGCTCCCAGATACCACCGGAGAAACTGTGTTGACGCAGTCTCCAGGCACCCTGTCTTTGTCTCCAGGGGAAAGAGCCACCCTCTCCTGCAGGGCCAGTCAGAGTGTTAGTAGCAACTCCTTAGCCTGGTACCAGCAGAAACCTGGCCAGGCTCCCAGGCTCCTCATCTCTGGTGCATCCAGCAGGGCCGCTGGCATCCCAGACAGGTTCAGTGGCAGTGGGTCTGGGACAGACTTCACTCTCACCATCAGCAGACTGGAGCCTGAAGATTTTGCAGTGTATTACTGTCAGCAGTATGGTAGTTCCCGGACGTTCGGCCAAGGGACCAAGGTGGAAATCAAACG	KV3-20	KJ1	QQYGSSRT	8	2.19436
c28941	149812	NN	ATGGACTGGACCTGGAGGATCCTCTTCTTGGTGGCAGCAGCTACAGGAGCCCACTCCCAGGTGCAGCTGGTGCAGTCTGGGGCTGAGGTGAAGAAGCCTGGGGCCTCAGTGAAGGTCTCCTGCAAGGCTTCTGGATACACCTTCACCAGTTATGATATCAACTGGGTGCGACAGGCCACTGGACAAGGACTTGAGTGGATGGGATGGATGAATTCTAACAATGGTAGGACAGGCTATGCACAGAAGTTCCAGGACAGAGTCACCATGACCAGGATAACCTCCATAGGCACAGCCTACATGGAGCTGAGCAGCCTGACATCGGAGGACACGGCCGTGTATTACTGTGCGAGAGGCAAGTGGGAGATACCAGATGACAACTGGGGCCAGGGAACCCTGGTC…	IGHV1-8*01	IGHD1-26*01	IGHJ4*02	ARGKWEIPDDN	11	3.86905	ATGGAAACCCCAGCGCAGCTTCTCTTCCTCCTGCTACTCTGGCTCCCAGATACCACCGGAGAAACTGTGTTGACGCAGTCTCCAGGCACCCTGTCTTTGTCTCCAGGGGAAAGAGCCACCCTCTCCTGCAGGGCCAGTCAGAGTGTTAGTAGCAACTCCTTAGCCTGGTACCAGCAGAAACCTGGCCAGGCTCCCAGGCTCCTCATCTCTGGTGCATCCAGCAGGGCCGCTGGCATCCCAGACAGGTTCAGTGGCAGTGGGTCTGGGACAGACTTCACTCTCACCATCAGCAGACTGGAGCCTGAAGATTTTGCAGTGTATTACTGTCAGCAGTATGGTAGTTCCCGGACGTTCGGCCAAGGGACCAAGGTGGAAATCAAACG	KV3-20	KJ1	QQYGSSRT	8	2.19436
c29245	149812	NN	ATGGACTGGACCTGGAGGATCCTCTTCTTGGTGGCAGCAGCCACAGGAGCCCACTCCCAGGTGCAGCTGGTGCAGTCTGGGGCTGAGGTGAAGAAGCCTGGGGCCTCAGTGAAGGTCTCCTGCAAGGCTTCTGGATACACCTTCATCGACTACTTTATGCACTGGGTGCGACAGGCCCCTGGACAAGGGCTTGAGTGGATGGGACGGATCAACACTAACAGTGGTGGCACAAACTATGCACAGAAGTTTCAGGGCAGGGTCACCATGACCAGGGACACATCCATCAGCACAGCCTACATGGAACTGAACAGTCTGAGATCTGACGACACGGCCGTGTATTACTGTGCGGTGGGGGAGCTGTTGTCAGCTTTTGACTACTGGGGCCAGGGAGCCCTGCTC…	IGHV1-2*06	IGHD3-16*01	IGHJ4*02	AVGELLSAFDY	11	3.003	ATGACCTGCTCCCCTCTCCTCCTCACCCTTCTCATTCACTGCACAGGGTCCTGGGCCCAGTCTGTGTTGACGCAGCCGCCCTCAGTGTCTGCGGCCCCAGGACAGAAGGTCACCATCTCCTGCTCTGGAAGCACCTCCAACATTGGGAATAATTATGTATCCTGGTACCAGCAGCTCCCAGGAAGAGTCCCCAAACTCCTCATTTATGACAATAATAAGCGACCCTCAGGGATTCCTGACCGATTCTCTGGCTCCAAGTCTGGCACGTCAGCCACCCTGGGCATCACCGGACTCCAGGCTGGGGACGAGGCCGATTATTACTGCGGAACATGGGATAGCAGCCTGAGTGCCGTATTCGGCGGAGGGACCAAGCTGACCGTCCTAGG	LV1-51	LJ2	GTWDSSLSAV	10	1.22699
c29079	149812	NN	ATGGACTGGACCTGGAGGATCCTCTTCTTGGTGGCAGCAGCCACAGGAGCCCACTCCCAGGTGCAGCTGGTGCAGTCTGGGGCTGAGGTGAAGAAGCCTGGGGCCTCAGTGAAGGTCTCCTGCAAGGCTTCTGGATACACCTTCATCGACTACTTTATGCACTGGGTGCGACAGGCCCCTGGACAAGGGCTTGAGTGGATGGGACGGATCAACACTAACAGTGGTGGCACAAACTATGCACAGAAGTTTCAGGGCAGGGTCACCATGACCAGGGACACATCCATCAGCACAGCCTACATGGAACTGAACAGTCTGAGATCTGACGACACGGCCGTGTATTACTGTGCGGTGGGGGAGCTGTTGTCAGCTTTTGACTACTGGGGCCAGGGAGCCCTGCTC…	IGHV1-2*06	IGHD3-16*01	IGHJ4*02	AVGELLSAFDY	11	3.003	AGACCAAGAATCACCGTGTCTGTGTCTCTCCTGCTTCCAGGGTCCTGGGCCCAGTCTGTGTTGACGCAGCCGCCCTCAGTGTCTGCGGCCCCAGGACAGAAGGTCACCATCTCCTGCTCTGGAAGCACCTCCAACATTGGGAATAATTATGTATCCTGGTACCAGCAGCTCCCAGGAAGAGTCCCCAAACTCCTCATTTATGACAATAATAAGCGACCCTCAGGGATTCCTGACCGATTCTCTGGCTCCAAGTCTGGCACGTCAGCCACCCTGGGCATCACCGGACTCCAGGCTGGGGACGAGGCCGATTATTACTGCGGAACATGGGATAGCAGCCTGAGTGCCGTATTCGGCGGAGGGACCAAGCTGACCGTCCTAGG	LV1-51	LJ2	GTWDSSLSAV	10	1.22699
c28795	149812	NN	ATGGACTGGACCTGGAGGATCCTCTTCTTGGTGGCAGCAGCCACAGGAGCCCACTCCCAGGTGCAGCTGGTGCAGTCTGGGGCTGAGGTGAAGAAGCCTGGGGCCTCAGTGAAGGTCTCCTGCAAGGCTTCTGGATACACCTTCATCGACTACTTTATGCACTGGGTGCGACAGGCCCCTGGACAAGGGCTTGAGTGGATGGGACGGATCAACACTAACAGTGGTGGCACAAACTATGCACAGAAGTTTCAGGGCAGGGTCACCATGACCAGGGACACATCCATCAGCACAGCCTACATGGAACTGAACAGTCTGAGATCTGACGACACGGCCGTGTATTACTGTGCGGTGGGGGAGCTGTTGTCAGCTTTTGACTACTGGGGCCAGGGAGCCCTGCTC…	IGHV1-2*06	IGHD3-16*01	IGHJ4*02	AVGELLSAFDY	11	3.003	ATGACCTGCTCCCCTCTCCTCCTCACCCTTCTCATTCACTGCACAGGGTCCTGGGCCCAGTCTGTGTTGACGCAGCCGCCCTCAGTGTCTGCGGCCCCAGGACAGAAGGTCACCATCTCCTGCTCTGGAAGCACCTCCAACATTGGGAATAATTATGTATCCTGGTACCAGCAGCTCCCAGGAAGAGTCCCCAAACTCCTCATTTATGACAATAATAAGCGACCCTCAGGGATTCCTGACCGATTCTCTGGCTCCAAGTCTGGCACGTCAGCCACCCTGGGCATCACCGGACTCCAGGCTGGGGACGAGGCCGATTATTACTGCGGAACATGGGATAGCAGCCTGAGTGCCGTATTCGGCGGAGGGACCAAGCTGACCGTCCTAGG	LV1-51	LJ2	GTWDSSLSAV	10	1.22699
c29211	149812	NN	ATGGACTGGACCTGGAGGATCCTCTTCTTGGTGGCAGCAGCCACAGGAGCCCACTCCCAGGTGCAGCTGGTGCAGTCTGGGGCTGAGGTGAAGAAGCCTGGGGCCTCAGTGAAGGTCTCCTGCAAGGCTTCTGGATACACCTTCATCGACTACTTTATGCACTGGGTGCGACAGGCCCCTGGACAAGGGCTTGAGTGGATGGGACGGATCAACACTAACAGTGGTGGCACAAACTATGCACAGAAGTTTCAGGGCAGGGTCACCATGACCAGGGACACATCCATCAGCACAGCCTACATGGAACTGAACAGTCTGAGATCTGACGACACGGCCGTGTATTACTGTGCGGTGGGGGAGCTGTTGTCAGCTTTTGACTACTGGGGCCAGGGAGCCCTGCTC…	IGHV1-2*06	IGHD3-16*01	IGHJ4*02	AVGELLSAFDY	11	3.003	ATGACCTGCTCCCCTCTCCTCCTCACCCTTCTCATTCACTGCACAGGGTCCTGGGCCCAGTCTGTGTTGACGCAGCCGCCCTCAGTGTCTGCGGCCCCAGGACAGAAGGTCACCATCTCCTGCTCTGGAAGCACCTCCAACATTGGGAATAATTATGTATCCTGGTACCAGCAGCTCCCAGGAAGAGTCCCCAAACTCCTCATTTATGACAATAATAAGCGACCCTCAGGGATTCCTGACCGATTCTCTGGCTCCAAGTCTGGCACGTCAGCCACCCTGGGCATCACCGGACTCCAGGCTGGGGACGAGGCCGATTATTACTGCGGAACATGGGATAGCAGCCTGAGTGCCGTATTCGGCGGAGGGACCAAGCTGACCGTCCTAGG	LV1-51	LJ2	GTWDSSLSAV	10	1.22699
c28759	149812	NN	ATGAAACACCTGTGGTTCTTCCTCCTGCTGGTGGCAGCTCCCAGATGGGTCCTGTCCCAGGTGCAGCTGCAGGAGTCGGGCCCAGGACTGGTGAAGCCTTCGGAGACCCTGTCCCTCACCTGCACTGTCTCTGGTGGCTCCATCAGTAGTTACTACTGGAGCTGGATCCGGCAGCCCGCCGGGAAGGGACTGGAGTGGATTGGACGTATATATACCAGTGGGACCACCAACTACAACCCCTCCCTCAAGAGTCGAGTCACCATGTCAGTAGACACGTCCAAGAACCAGTTCTCCCTGAAGCTGAGGTCTGTGACCGCCGCGGACACGGCCATATATTACTGTGCGAGGGATCGGGGATATAGCAGTTCGGAATATTTTGACTACTGGGGCCAGGGAACC…	IGHV4-4*07	IGHD6-19*01	IGHJ4*02	ARDRGYSSSEYFDY	14	2.38806	ATGGACATGAGGGTCCCCGCTCAGCTCCTGGGGCTCCTGCTGCTCTGGCTCCCAGGTGCCAGATGTGTCATCTGGATGACCCAGTCTCCATCCTTACTCTCTGCATCTACAGGAGACAGAGTCACCATCAGTTGTCGGATGAGTCAGGACATTAGCAGTTATTTAGCCTGGTATCAGCAAAAACCAGGGAAAGCCCCTGAGCTCCTGATCTTTGGTGCATCCACTTTACAAAGTGGGGTCCCATCAAGATTCAGTGGCAGTGGATCTGGGACAGATTTCACTCTCACCATCAGTGGCCTGCAGTCTGAAGATTTTGCTACTTATTATTGTCAACAGTATTATAGTTTCCCTCGAACGTTCGGCCAAGGGACCAAGGTGGAAATCAAACG	KV1D-8	KJ1	QQYYSFPRT	9	2.50784
c29231	149812	NN	ATGAAACACCTGTGGTTCTTCCTCCTGCTGGTGGCAGCTCCCAGATGGGTCCTGTCCCAGGTGCAGCTGCAGGAGTCGGGCCCAGGACTGGTGAAGCCTTCGGAGACCCTGTCCCTCACCTGCACTGTCTCTGGTGGCTCCATCAGTAGTTACTACTGGAGCTGGATCCGGCAGCCCGCCGGGAAGGGACTGGAGTGGATTGGACGTATATATACCAGTGGGACCACCAACTACAACCCCTCCCTCAAGAGTCGAGTCACCATGTCAGTAGACACGTCCAAGAACCAGTTCTCCCTGAAGCTGAGGTCTGTGACCGCCGCGGACACGGCCATATATTACTGTGCGAGGGATCGGGGATATAGCAGTTCGGAATATTTTGACTACTGGGGCCAGGGAACC…	IGHV4-4*07	IGHD6-19*01	IGHJ4*02	ARDRGYSSSEYFDY	14	2.38806	ATGGACATGAGGGTCCCCGCTCAGCTCCTGGGGCTCCTGCTGCTCTGGCTCCCAGGTGCCAGATGTGTCATCTGGATGACCCAGTCTCCATCCTTACTCTCTGCATCTACAGGAGACAGAGTCACCATCAGTTGTCGGATGAGTCAGGACATTAGCAGTTATTTAGCCTGGTATCAGCAAAAACCAGGGAAAGCCCCTGAGCTCCTGATCTTTGGTGCATCCACTTTACAAAGTGGGGTCCCATCAAGATTCAGTGGCAGTGGATCTGGGACAGATTTCACTCTCACCATCAGTGGCCTGCAGTCTGAAGATTTTGCTACTTATTATTGTCAACAGTATTATAGTTTCCCTCGAACGTTCGGCCAAGGGACCAAGGTGGAAATCAAACG	KV1D-8	KJ1	QQYYSFPRT	9	2.50784
c28720	149812	NN	ATGAAACACCTGTGGTTCTTCCTCCTGCTGGTGGCAGCTCCCAGATGGGTCCTGTCCCAGGTGCAGCTGCAGGAGTCGGGCCCAGGACTGGTGAAGCCTTCGGAGACCCTGTCCCTCACCTGCACTGTCTCTGGTGGCTCCATCAGTAGTTACTACTGGAGCTGGATCCGGCAGCCCGCCGGGAAGGGACTGGAGTGGATTGGACGTATATATACCAGTGGGACCACCAACTACAACCCCTCCCTCAAGAGTCGAGTCACCATGTCAGTAGACACGTCCAAGAACCAGTTCTCCCTGAAGCTGAGGTCTGTGACCGCCGCGGACACGGCCATATATTACTGTGCGAGGGATCGGGGATATAGCAGTTCGGAATATTTTGACTACTGGGGCCAGGGAACC…	IGHV4-4*07	IGHD6-19*01	IGHJ4*02	ARDRGYSSSEYFDY	14	2.38806	ATGGACATGAGGGTCCCCGCTCAGCTCCTGGGGCTCCTGCTGCTCTGGCTCCCAGGTGCCAGATGTGTCATCTGGATGACCCAGTCTCCATCCTTACTCTCTGCATCTACAGGAGACAGAGTCACCATCAGTTGTCGGATGAGTCAGGACATTAGCAGTTATTTAGCCTGGTATCAGCAAAAACCAGGGAAAGCCCCTGAGCTCCTGATCTTTGGTGCATCCACTTTACAAAGTGGGGTCCCATCAAGATTCAGTGGCAGTGGATCTGGGACAGATTTCACTCTCACCATCAGTGGCCTGCAGTCTGAAGATTTTGCTACTTATTATTGTCAACAGTATTATAGTTTCCCTCGAACGTTCGGCCAAGGGACCAAGGTGGAAATCAAACG	KV1D-8	KJ1	QQYYSFPRT	9	2.50784
c28728	149812	NN	ATGGAGTTTGGGCTGAGCTGGCTTTTTCTTGTGGCTATTTTAAAAGGTGTCCAGTGTGAGGTGCAGCTGTTGGAGTCTGGGGGAGGCTTGGTACAGCCTGGGGAGTCCCTGAGACTCTCCTGTGCAGCCTCTGGATTCACCTTTAGCAGCTATGCCATGAGCTGGGTCCGCCAGGCTCCAGGGAAGGGGCTTGAGTGGGTCTCTGCTATTAGTGGTAGTGCTGGCAGCACATACTACGCAGACTCCGTGAAGGGCCGGTTCACCATCTCCAGAGACAATTCCAAGAACACGGTGTATCTGCAAATGAACAGTCTGAGAGCCGAGGACACGGCCGTATATTTCTGTGCGAAAGAGAGACTAGTTATTACTATATTTGACTACTGGGGCCAGGGATCCCTG…	IGHV3-23*01	IGHD3-22*01	IGHJ4*02	AKERLVITIFDY	12	2.66272	ATGGACATGAGGGTCCCCGCTCAGCTCCTGGGGCTCCTGCTGCTCTGGCTCCCAGGTGCCAAATGTGACATCCAGGTGACCCAGTCTCCTTCCACCCTGTCTGCATCTGTAGGAGACAGAGTCACCATCACTTGCCGGGCCAGTCAGAGTATTAGTAGCTGGTTGGCCTGGTATCAGCAGAAACCAGGGAAAGCCCCGAAGCTCCTAATCTATAAGGCGTCTAGTTTAGAAAGTGGGGTCCCATCAAGGTTCAGCGGCAGTGGATCTGGGACAGATTTCATTCTCACCATCAGCAGCCTGCAGCCTGATGATTTTGCAACTTATTACTGTCAACACTATAATAGTTATTCTCGGACGTTCGGCCAAGGGACCAAGGTAGAAATCAAACG	KV1-5	KJ1	QHYNSYSRT	9	2.49221
c28893	149812	NN	ATGGAGTTTGGGCTGAGCTGGCTTTTTCTTGTGGCTATTTTAAAAGGTGTCCAGTGTGAGGTGCAGCTGTTGGAGTCTGGGGGAGGCTTGGTACAGCCTGGGGAGTCCCTGAGACTCTCCTGTGCAGCCTCTGGATTCACCTTTAGCAGCTATGCCATGAGCTGGGTCCGCCAGGCTCCAGGGAAGGGGCTTGAGTGGGTCTCTGCTATTAGTGGTAGTGCTGGCAGCACATACTACGCAGACTCCGTGAAGGGCCGGTTCACCATCTCCAGAGACAATTCCAAGAACACGGTGTATCTGCAAATGAACAGTCTGAGAGCCGAGGACACGGCCGTATATTTCTGTGCGAAAGAGAGACTAGTTATTACTATATTTGACTACTGGGGCCAGGGATCCCTG…	IGHV3-23*01	IGHD3-22*01	IGHJ4*02	AKERLVITIFDY	12	2.66272	ATGGACATGAGGGTCCCCGCTCAGCTCCTGGGGCTCCTGCTGCTCTGGCTCCCAGGTGCCAAATGTGACATCCAGGTGACCCAGTCTCCTTCCACCCTGTCTGCATCTGTAGGAGACAGAGTCACCATCACTTGCCGGGCCAGTCAGAGTATTAGTAGCTGGTTGGCCTGGTATCAGCAGAAACCAGGGAAAGCCCCGAAGCTCCTAATCTATAAGGCGTCTAGTTTAGAAAGTGGGGTCCCATCAAGGTTCAGCGGCAGTGGATCTGGGACAGATTTCATTCTCACCATCAGCAGCCTGCAGCCTGATGATTTTGCAACTTATTACTGTCAACACTATAATAGTTATTCTCGGACGTTCGGCCAAGGGACCAAGGTAGAAATCAAACG	KV1-5	KJ1	QHYNSYSRT	9	2.49221
c28885	149812	NN	ATGGAGTTTGGGCTGAGCTGGCTTTTTCTTGTGGCTATTTTAAAAGGTGTCCAGTGTGAGGTGCAGCTGTTGGAGTCTGGGGGAGGCTTGGTACAGCCTGGGGAGTCCCTGAGACTCTCCTGTGCAGCCTCTGGATTCACCTTTAGCAGCTATGCCATGAGCTGGGTCCGCCAGGCTCCAGGGAAGGGGCTTGAGTGGGTCTCTGCTATTAGTGGTAGTGCTGGCAGCACATACTACGCAGACTCCGTGAAGGGCCGGTTCACCATCTCCAGAGACAATTCCAAGAACACGGTGTATCTGCAAATGAACAGTCTGAGAGCCGAGGACACGGCCGTATATTTCTGTGCGAAAGAGAGACTAGTTATTACTATATTTGACTACTGGGGCCAGGGATCCCTG…	IGHV3-23*01	IGHD3-22*01	IGHJ4*02	AKERLVITIFDY	12	2.66272	ATGGACATGAGGGTCCCCGCTCAGCTCCTGGGGCTCCTGCTGCTCTGGCTCCCAGGTGCCAAATGTGACATCCAGGTGACCCAGTCTCCTTCCACCCTGTCTGCATCTGTAGGAGACAGAGTCACCATCACTTGCCGGGCCAGTCAGAGTATTAGTAGCTGGTTGGCCTGGTATCAGCAGAAACCAGGGAAAGCCCCGAAGCTCCTAATCTATAAGGCGTCTAGTTTAGAAAGTGGGGTCCCATCAAGGTTCAGCGGCAGTGGATCTGGGACAGATTTCATTCTCACCATCAGCAGCCTGCAGCCTGATGATTTTGCAACTTATTACTGTCAACACTATAATAGTTATTCTCGGACGTTCGGCCAAGGGACCAAGGTAGAAATCAAACG	KV1-5	KJ1	QHYNSYSRT	9	2.49221
c28703	149812	NN	ATGGAGTTTGGGCTGAGCTGGCTTTTTCTTGTGGCTATTTTAAAAGGTGTCCAGTGTGAGGTGCAGCTGTTGGAGTCTGGGGGAGGCTTGGTACAGCCTGGGGAGTCCCTGAGACTCTCCTGTGCAGCCTCTGGATTCACCTTTAGCAGCTATGCCATGAGCTGGGTCCGCCAGGCTCCAGGGAAGGGGCTTGAGTGGGTCTCTGCTATTAGTGGTAGTGCTGGCAGCACATACTACGCAGACTCCGTGAAGGGCCGGTTCACCATCTCCAGAGACAATTCCAAGAACACGGTGTATCTGCAAATGAACAGTCTGAGAGCCGAGGACACGGCCGTATATTTCTGTGCGAAAGAGAGACTAGTTATTACTATATTTGACTACTGGGGCCAGGGATCCCTG…	IGHV3-23*01	IGHD3-22*01	IGHJ4*02	AKERLVITIFDY	12	2.66272	ATGGACATGAGGGTCCCCGCTCAGCTCCTGGGGCTCCTGCTGCTCTGGCTCCCAGGTGCCAAATGTGACATCCAGGTGACCCAGTCTCCTTCCACCCTGTCTGCATCTGTAGGAGACAGAGTCACCATCACTTGCCGGGCCAGTCAGAGTATTAGTAGCTGGTTGGCCTGGTATCAGCAGAAACCAGGGAAAGCCCCGAAGCTCCTAATCTATAAGGCGTCTAGTTTAGAAAGTGGGGTCCCATCAAGGTTCAGCGGCAGTGGATCTGGGACAGATTTCATTCTCACCATCAGCAGCCTGCAGCCTGATGATTTTGCAACTTATTACTGTCAACACTATAATAGTTATTCTCGGACGTTCGGCCAAGGGACCAAGGTAGAAATCAAACG	KV1-5	KJ1	QHYNSYSRT	9	2.49221
c28961	149812	NN	ATGAAACACCTGTGGTTCTTCCTCCTGCTGGTGGCAGCTCCCAGATGGGTCCTGTCCCACGTGCAGCTGCAGGAGTCGGGCCCAGGACTGGTGAAGCCCTCGGAGACCCTGTCCCTCACCTGCACTGTTTCTAATGGCTCCATCGGTGGGCATTACTGGAATTGGGTCCGGCAGCCCGCCGGGAAGGGACTGGAGTGGATCGGGCGTATTTATACATCTAGTGGGAGCACCAACTACAACCCCTCCCTCACGAGTCGAGTCAACATGTCAGCGGACACGTCCAAAAATCAGTTCTCCCTGAGCCTGAAGTCTGTGACCGCCGCGGACACGGCCGTGTATTACTGTGCGTCGTCCGTTTCGGGGAGTTATTTGTACTACTTTGACAACTGGGGCCAGGGA…	IGHV4-4*07	IGHD3-10*01	IGHJ4*02	ASSVSGSYLYYFDN	14	8.0597	ATGGAAGCCCCAGCTCAGCTTCTCTTCCTCCTGCTACTCTGGCTCCCAGATTCCACCGGAGACATTGTGTTGACACAGTCTCCAGCCACCCTGTCTTTGTCTCCAGGGGACAGAGCCACCCTCTCCTGCAGGGCCAGTCAGAGTGTTGGCATCTACTTAGCCTGGTACCAGCAGAGACCTGGCCTGGCTCCCAGGCTCCTCATCTATGATGCATCCAACAGGGCCTCTGGCATCCCAGACAGGTTCAGTGGCAGTGGGTCTGGGACGGACTTCACTCTCACCATCAGCAGCCTAGAGCCTGAAGATTTTGCAGTTTATTACTGTCAACAACGTCGCAACTGGCCCCCTTTATTCACTTTCGGCCCTGGGACCAAAGTGGATATCAAACG	KV3-11	KJ3	QQRRNWPPLFT	11	4.32099
c28888	149812	NN	ATGAAACACCTGTGGTTCTTCCTCCTGCTGGTGGCAGCTCCCAGATGGGTCCTGTCCCACGTGCAGCTGCAGGAGTCGGGCCCAGGACTGGTGAAGCCCTCGGAGACCCTGTCCCTCACCTGCACTGTTTCTAATGGCTCCATCGGTGGGCATTACTGGAATTGGGTCCGGCAGCCCGCCGGGAAGGGACTGGAGTGGATCGGGCGTATTTATACATCTAGTGGGAGCACCAACTACAACCCCTCCCTCACGAGTCGAGTCAACATGTCAGCGGACACGTCCAAAAATCAGTTCTCCCTGAGCCTGAAGTCTGTGACCGCCGCGGACACGGCCGTGTATTACTGTGCGTCGTCCGTTTCGGGGAGTTATTTGTACTACTTTGACAACTGGGGCCAGGGA…	IGHV4-4*07	IGHD3-10*01	IGHJ4*02	ASSVSGSYLYYFDN	14	8.0597	ATGGAAGCCCCAGCTCAGCTTCTCTTCCTCCTGCTACTCTGGCTCCCAGATTCCACCGGAGACATTGTGTTGACACAGTCTCCAGCCACCCTGTCTTTGTCTCCAGGGGACAGAGCCACCCTCTCCTGCAGGGCCAGTCAGAGTGTTGGCATCTACTTAGCCTGGTACCAGCAGAGACCTGGCCTGGCTCCCAGGCTCCTCATCTATGATGCATCCAACAGGGCCTCTGGCATCCCAGACAGGTTCAGTGGCAGTGGGTCTGGGACGGACTTCACTCTCACCATCAGCAGCCTAGAGCCTGAAGATTTTGCAGTTTATTACTGTCAACAACGTCGCAACTGGCCCCCTTTATTCACTTTCGGCCCTGGGACCAAAGTGGATATCAAACG	KV3-11	KJ3	QQRRNWPPLFT	11	4.32099
c28972	149812	NN	ATGGACACACTTTGCTCCACGCTCCTGCTGCTGACCATCCCTTCATGGGTCTTGTCCCAGATCACCTTGAAGGAGTCTGGTCCTACGCTGGTGAAACCCACACAGACCCTCACGCTGACCTGCACCTTCTCTGGGTTCTCGCTCAGCACTAATGGAGTGGGTGTGGACTGGATCCGTCAGCCCCCAGGAAAGGCCCTGGAGTGGCTTGCAGTCATTTATTGGAATGATAGTAAGCGCTACAGGCCATCTCTGAAGAACAGGCTCACCATCACCAAGGACACCTCCAAAAACCAGGTGGTCCTTACAATGACCAACATGGACCCTGCGGACACAGCCACATATTACTGTGCACACAGTGGCTACGGTGACTATGTGGGCTACTTAGACTATTGGGGCCAG…	IGHV2-5*01	IGHD4-17*01	IGHJ4*02	AHSGYGDYVGYLDY	14	3.18841	ATGGCCTGGACCGTTCTCCTCCTCGGCCTCCTCTCTCACTGCACAGGCTCTGTGACCCCCTATGTGCTGACTCAGCCATCCTCAGTGTCGGTGGCCCCAGGAAAGACGGCCACGATTACCTGTGGGGCAAACAATATTGGAATGAAAAGTGTGCACTGGTATCAGCAGAAGCCAGGCCAGGCCCCTGTGTTGGTCATCTATTATGATAGCGGCCGGCCCTCAGGGATCCCTGAGCGATTCTCTGGCTCCAACTCTGGGAACACGGCCACCTTGACCATCACCAGGGTCGAAGCCGGGGATGAGGCCGACTATTACTGTCAGGTATGGGATAGTAGTAGTGATCATCCGAAGGTGTTCGGCGGAGGGACCAAGCTGACCGTCCTAGG	LV3-21	LJ3	QVWDSSSDHPKV	12	4.02477
c29096	149812	NN	ATGGACACACTTTGCTCCACGCTCCTGCTGCTGACCATCCCTTCATGGGTCTTGTCCCAGATCACCTTGAAGGAGTCTGGTCCTACGCTGGTGAAACCCACACAGACCCTCACGCTGACCTGCACCTTCTCTGGGTTCTCGCTCAGCACTAATGGAGTGGGTGTGGACTGGATCCGTCAGCCCCCAGGAAAGGCCCTGGAGTGGCTTGCAGTCATTTATTGGAATGATAGTAAGCGCTACAGGCCATCTCTGAAGAACAGGCTCACCATCACCAAGGACACCTCCAAAAACCAGGTGGTCCTTACAATGACCAACATGGACCCTGCGGACACAGCCACATATTACTGTGCACACAGTGGCTACGGTGACTATGTGGGCTACTTAGACTATTGGGGCCAG…	IGHV2-5*01	IGHD4-17*01	IGHJ4*02	AHSGYGDYVGYLDY	14	3.18841	ATGGCCTGGACCGTTCTCCTCCTCGGCCTCCTCTCTCACTGCACAGGCTCTGTGACCCCCTATGTGCTGACTCAGCCATCCTCAGTGTCGGTGGCCCCAGGAAAGACGGCCACGATTACCTGTGGGGCAAACAATATTGGAATGAAAAGTGTGCACTGGTATCAGCAGAAGCCAGGCCAGGCCCCTGTGTTGGTCATCTATTATGATAGCGGCCGGCCCTCAGGGATCCCTGAGCGATTCTCTGGCTCCAACTCTGGGAACACGGCCACCTTGACCATCACCAGGGTCGAAGCCGGGGATGAGGCCGACTATTACTGTCAGGTATGGGATAGTAGTAGTGATCATCCGAAGGTGTTCGGCGGAGGGACCAAGCTGACCGTCCTAGG	LV3-21	LJ3	QVWDSSSDHPKV	12	4.02477
c29008	149812	NN	ATGGACACACTTTGCTCCACGCTCCTGCTGCTGACCATCCCTTCATGGGTCTTGTCCCAGATCACCCTGAAGGAGTCTGGTCCTACGCTGGTGAAACCCACACAGACCCTCACGCTGACCTGCACCTTCTCTGGGTTCTCACTCACCACTAGTGGAGTGGCTGTGGGCTGGATCCGTCAGCCCCCAGGAAAGGCCCTGGAGTGGCTTGCACTCATTTATTGGGATGATGATAAGCGCTACAGACCATCTCTGGAGAGCAGACTCACCATCACCAAGGACACCTCCAAAAACCAGGTGGTCCTGACAGTGACCAACATGGACCCTATGGACACAGCCACATACTACTGTGCACATGAGTACGGTGACTACGGCGGGGGAGGCTTTGACTACTGGGGCCAG…	IGHV2-5*02	IGHD4-17*01	IGHJ4*02	AHEYGDYGGGGFDY	14	2.94985	ATGGACATGAGGGTCCCCGCTCAGCTCCTGGGGCTCCTGCTACTCTGGCTCCGAGGTGCCAGATGTGACATCCAGATGACCCAGTCTCCATCTTCCCTGTCTGCATCTGTAGGAGACAGAGTCACCATCACTTGCCGGGCAAGTCAGAGCATTGGCAGCTATTTAAATTGGTATCAGCAGAAACCAGGGAAAGCCCCTAAACTCCTTATCTATGCTGCATCCATTTTGCAAAGTGGGGTCCCATCAAGGTTCAGTGGCAGTGGATCTGGGACAGATTTCACTCTCACCATCAGCAGTCTGCAACCTGAAGATTTTGTAACTTACTATTGTCAACAGAGTCACAGTTCCTTGTACACTTTTGGCCAGGGGACCAAGCTGGACTTCAAACG	KV1-39	KJ2	QQSHSSLYT	9	2.89389
c28976	149812	NN	ATGGAGTTTGGGCTGAGCTGGGTTTTCCTCGTTGCTCTTTTAAGAGGTGTCCAGTGTCAGGTGCAGCTGGTGGAGTCTGGGGGAGGCGTGGTCCAGCCTGGGAGGTCCCTGAGACTCTCCTGTGCAGCGTCTGCATTCAGGTTCAGGAGCTATGGCATGCACTGGGTCCGCCAGGCTCCAGGCAAGGGGCTGGAGTGGGTGGCACTTATATCGTCTGATGGAAGTAAAAAATACTATGCAGACTCCGTGAAGGGCCGATTCACCATCTCCAGAGACAATTCCAAGAACACGCTGTATGTGCAAATGAACAGCCTGAGAGCCGAGGACACGGCTGTGTATTACTGTGCGAGGAGCTACGGTGACAACTGGTTCGACCCCTGGGGCCAGGGAACCCTGGTC…	IGHV3-33*01	IGHD4-17*01	IGHJ5*02	ARSYGDNWFDP	11	2.62391	ATGGACATGAGGGTCCCCGCTCAGCTCCTGGGGCTTCTGCTGCTCTGGCTCCCAGGTGCCAGATGTGCCATCCAGTTGACCCAGTCTCCATCCTCCCTGTCTGCATCTGTAGGAGACAGAGTCACCATCACTTGCCGGGCAAGTCAGGGCATCAGCAGCGCTGTAGCCTGGTATCAGCAGAAACCAGGGAAAGCTCCTAAACTCCTGATCTATGATGCCTCCAGTTTGGAAAGTGGGGTCCCATCAAGGTTCAGCGGCAGTGCATCTGGGCCAGATTTCACTCTCACCATCAGCAGCCTGCAACCTGAAGATTTTGCGATTTATTACTGTCAACAGTTTATAAGTTTCCCTCCCATGTACACTTTTGGCCAGGGGACCAAGCTGGAGATCGAACG	KV1-13	KJ2	QQFISFPPMYT	11	3.73832
c28948	149812	NN	ATGGAGTTGGGGCTGTGCTGGGTTTTCCTTGTTGCTATTTTAGAAGGTGTCCAGTGTGAGGTGCACCTGGTGGAGTCTGGGGGAGGCTTGGTACAGCCTGGAGGGTCCCTGAGACTCTCCTGTGCAGTCTCTGGATTCACCTTCAGTAGTTATGAAATGAACTGGGTCCGCCAGGCTCCAGGGAAGGGGCTGGAGTGGGTTTCATACATTAGTAGTAGTGCTACTACCATGAAATACGCAGACTCTGTGAAGGGCCGATTCACCATCTCCAGAGACAACGCCAAGAATTCACTGTATCTGCAAATGAACAGCCTGAGAGGCGAGGACACGGCTGTTTATTACTGTGTGGGTGGGAAACATGACTCCTGGGGCCAGGGAACCCTGGTCACCGTCTCCTCA…	IGHV3-48*03	IGHD1-26*01	IGHJ4*02	VGGKHDS	7	2.73556	ATGGACATGAGGGTCCCCGCTCAGCTCCTGGGGCTCCTGCTGCTCTGGCTCCCAGGTGCCAAATGTGACATCCAGATGACCCAGTCTCCTTCCACCCTGTCTGCATCTGTGGGAGACAGTGTCACCATCACTTGCCGGGCCAGTCAGAGTATTAGTAGGTGGTTGGCCTGGTATCAGCAAAAACCAGGGAAAGCCCCTAACCTCCTGATCTATGATGCCTCCAGTTTGGAAAGTGGGGTCCCATCAAGGTTCAGCGGCAGTGGATCTGGGACAGAATTCACTCTCACCATCAGCAGCCTGCAGCCTGATGATTCTGCAACTTATTACTGCCAACAGTATAATAGTTTCTGGACGTTCGGCCAAGGGACCAAGGTGGAAATCAAACG	KV1-5	KJ1	QQYNSFWT	8	1.89873
c29208	149812	NN	ATGGAGTTGGGGCTGTGCTGGGTTTTCCTTGTTGCTATTTTAGAAGGTGTCCAGTGTGAGGTGCACCTGGTGGAGTCTGGGGGAGGCTTGGTACAGCCTGGAGGGTCCCTGAGACTCTCCTGTGCAGTCTCTGGATTCACCTTCAGTAGTTATGAAATGAACTGGGTCCGCCAGGCTCCAGGGAAGGGGCTGGAGTGGGTTTCATACATTAGTAGTAGTGCTACTACCATGAAATACGCAGACTCTGTGAAGGGCCGATTCACCATCTCCAGAGACAACGCCAAGAATTCACTGTATCTGCAAATGAACAGCCTGAGAGGCGAGGACACGGCTGTTTATTACTGTGTGGGTGGGAAACATGACTCCTGGGGCCAGGGAACCCTGGTCACCGTCTCCTCA…	IGHV3-48*03	IGHD1-26*01	IGHJ4*02	VGGKHDS	7	2.73556	ATGGACATGAGGGTCCCCGCTCAGCTCCTGGGGCTCCTGCTGCTCTGGCTCCCAGGTGCCAAATGTGACATCCAGATGACCCAGTCTCCTTCCACCCTGTCTGCATCTGTGGGAGACAGTGTCACCATCACTTGCCGGGCCAGTCAGAGTATTAGTAGGTGGTTGGCCTGGTATCAGCAAAAACCAGGGAAAGCCCCTAACCTCCTGATCTATGATGCCTCCAGTTTGGAAAGTGGGGTCCCATCAAGGTTCAGCGGCAGTGGATCTGGGACAGAATTCACTCTCACCATCAGCAGCCTGCAGCCTGATGATTCTGCAACTTATTACTGCCAACAGTATAATAGTTTCTGGACGTTCGGCCAAGGGACCAAGGTGGAAATCAAACG	KV1-5	KJ1	QQYNSFWT	8	1.89873
c28833	149812	NN	ATGGAGTTGGGGCTGTGCTGGGTTTTCCTTGTTGCTATTTTAGAAGGTGTCCAGTGTGAGGTGCACCTGGTGGAGTCTGGGGGAGGCTTGGTACAGCCTGGAGGGTCCCTGAGACTCTCCTGTGCAGTCTCTGGATTCACCTTCAGTAGTTATGAAATGAACTGGGTCCGCCAGGCTCCAGGGAAGGGGCTGGAGTGGGTTTCATACATTAGTAGTAGTGCTACTACCATGAAATACGCAGACTCTGTGAAGGGCCGATTCACCATCTCCAGAGACAACGCCAAGAATTCACTGTATCTGCAAATGAACAGCCTGAGAGGCGAGGACACGGCTGTTTATTACTGTGTGGGTGGGAAACATGACTCCTGGGGCCAGGGAACCCTGGTCACCGTCTCCTCA…	IGHV3-48*03	IGHD1-26*01	IGHJ4*02	VGGKHDS	7	2.73556	ATGGACATGAGGGTCCCCGCTCAGCTCCTGGGGCTCCTGCTGCTCTGGCTCCCAGGTGCCAAATGTGACATCCAGATGACCCAGTCTCCTTCCACCCTGTCTGCATCTGTGGGAGACAGTGTCACCATCACTTGCCGGGCCAGTCAGAGTATTAGTAGGTGGTTGGCCTGGTATCAGCAAAAACCAGGGAAAGCCCCTAACCTCCTGATCTATGATGCCTCCAGTTTGGAAAGTGGGGTCCCATCAAGGTTCAGCGGCAGTGGATCTGGGACAGAATTCACTCTCACCATCAGCAGCCTGCAGCCTGATGATTCTGCAACTTATTACTGCCAACAGTATAATAGTTTCTGGACGTTCGGCCAAGGGACCAAGGTGGAAATCAAACG	KV1-5	KJ1	QQYNSFWT	8	1.89873
c28884	149812	NN	ATGGAGTTGGGGCTGTGCTGGGTTTTCCTTGTTGCTATTTTAGAAGGTGTCCAGTGTGAGGTGCACCTGGTGGAGTCTGGGGGAGGCTTGGTACAGCCTGGAGGGTCCCTGAGACTCTCCTGTGCAGTCTCTGGATTCACCTTCAGTAGTTATGAAATGAACTGGGTCCGCCAGGCTCCAGGGAAGGGGCTGGAGTGGGTTTCATACATTAGTAGTAGTGCTACTACCATGAAATACGCAGACTCTGTGAAGGGCCGATTCACCATCTCCAGAGACAACGCCAAGAATTCACTGTATCTGCAAATGAACAGCCTGAGAGGCGAGGACACGGCTGTTTATTACTGTGTGGGTGGGAAACATGACTCCTGGGGCCAGGGAACCCTGGTCACCGTCTCCTCA…	IGHV3-48*03	IGHD1-26*01	IGHJ4*02	VGGKHDS	7	2.73556	ATGGACATGAGGGTCCCCGCTCAGCTCCTGGGGCTCCTGCTGCTCTGGCTCCCAGGTGCCAAATGTGACATCCAGATGACCCAGTCTCCTTCCACCCTGTCTGCATCTGTGGGAGACAGTGTCACCATCACTTGCCGGGCCAGTCAGAGTATTAGTAGGTGGTTGGCCTGGTATCAGCAAAAACCAGGGAAAGCCCCTAACCTCCTGATCTATGATGCCTCCAGTTTGGAAAGTGGGGTCCCATCAAGGTTCAGCGGCAGTGGATCTGGGACAGAATTCACTCTCACCATCAGCAGCCTGCAGCCTGATGATTCTGCAACTTATTACTGCCAACAGTATAATAGTTTCTGGACGTTCGGCCAAGGGACCAAGGTGGAAATCAAACG	KV1-5	KJ1	QQYNSFWT	8	1.89873
c28702	149812	NN	ATGGAGTTGGGGCTGTGCTGGGTTTTCCTTGTTGCTATTTTAGAAGGTGTCCAGTGTGAGGTGCACCTGGTGGAGTCTGGGGGAGGCTTGGTACAGCCTGGAGGGTCCCTGAGACTCTCCTGTGCAGTCTCTGGATTCACCTTCAGTAGTTATGAAATGAACTGGGTCCGCCAGGCTCCAGGGAAGGGGCTGGAGTGGGTTTCATACATTAGTAGTAGTGCTACTACCATGAAATACGCAGACTCTGTGAAGGGCCGATTCACCATCTCCAGAGACAACGCCAAGAATTCACTGTATCTGCAAATGAACAGCCTGAGAGGCGAGGACACGGCTGTTTATTACTGTGTGGGTGGGAAACATGACTCCTGGGGCCAGGGAACCCTGGTCACCGTCTCCTCA…	IGHV3-48*03	IGHD1-26*01	IGHJ4*02	VGGKHDS	7	2.73556	ATGGACATGAGGGTCCCCGCTCAGCTCCTGGGGCTCCTGCTGCTCTGGCTCCCAGGTGCCAAATGTGACATCCAGATGACCCAGTCTCCTTCCACCCTGTCTGCATCTGTGGGAGACAGTGTCACCATCACTTGCCGGGCCAGTCAGAGTATTAGTAGGTGGTTGGCCTGGTATCAGCAAAAACCAGGGAAAGCCCCTAACCTCCTGATCTATGATGCCTCCAGTTTGGAAAGTGGGGTCCCATCAAGGTTCAGCGGCAGTGGATCTGGGACAGAATTCACTCTCACCATCAGCAGCCTGCAGCCTGATGATTCTGCAACTTATTACTGCCAACAGTATAATAGTTTCTGGACGTTCGGCCAAGGGACCAAGGTGGAAATCAAACG	KV1-5	KJ1	QQYNSFWT	8	1.89873
c29025	149812	NN	ATGGAGTTGGGGCTGTGCTGGGTTTTCCTTGTTGCTATTTTAGAAGGTGTCCAGTGTGAGGTGCACCTGGTGGAGTCTGGGGGAGGCTTGGTACAGCCTGGAGGGTCCCTGAGACTCTCCTGTGCAGTCTCTGGATTCACCTTCAGTAGTTATGAAATGAACTGGGTCCGCCAGGCTCCAGGGAAGGGGCTGGAGTGGGTTTCATACATTAGTAGTAGTGCTACTACCATGAAATACGCAGACTCTGTGAAGGGCCGATTCACCATCTCCAGAGACAACGCCAAGAATTCACTGTATCTGCAAATGAACAGCCTGAGAGGCGAGGACACGGCTGTTTATTACTGTGTGGGTGGGAAACATGACTCCTGGGGCCAGGGAACCCTGGTCACCGTCTCCTCA…	IGHV3-48*03	IGHD1-26*01	IGHJ4*02	VGGKHDS	7	2.73556	ATGGACATGAGGGTCCCCGCTCAGCTCCTGGGGCTCCTGCTGCTCTGGCTCCCAGGTGCCAAATGTGACATCCAGATGACCCAGTCTCCTTCCACCCTGTCTGCATCTGTGGGAGACAGTGTCACCATCACTTGCCGGGCCAGTCAGAGTATTAGTAGGTGGTTGGCCTGGTATCAGCAAAAACCAGGGAAAGCCCCTAACCTCCTGATCTATGATGCCTCCAGTTTGGAAAGTGGGGTCCCATCAAGGTTCAGCGGCAGTGGATCTGGGACAGAATTCACTCTCACCATCAGCAGCCTGCAGCCTGATGATTCTGCAACTTATTACTGCCAACAGTATAATAGTTTCTGGACGTTCGGCCAAGGGACCAAGGTGGAAATCAAACG	KV1-5	KJ1	QQYNSFWT	8	1.89873
c28975	149812	NN	ATGGAGTTGGGGCTGTGCTGGGTTTTCCTTGTTGCTATTTTAGAAGGTGTCCAGTGTGAGGTGCACCTGGTGGAGTCTGGGGGAGGCTTGGTACAGCCTGGAGGGTCCCTGAGACTCTCCTGTGCAGTCTCTGGATTCACCTTCAGTAGTTATGAAATGAACTGGGTCCGCCAGGCTCCAGGGAAGGGGCTGGAGTGGGTTTCATACATTAGTAGTAGTGCTACTACCATGAAATACGCAGACTCTGTGAAGGGCCGATTCACCATCTCCAGAGACAACGCCAAGAATTCACTGTATCTGCAAATGAACAGCCTGAGAGGCGAGGACACGGCTGTTTATTACTGTGTGGGTGGGAAACATGACTCCTGGGGCCAGGGAACCCTGGTCACCGTCTCCTCA…	IGHV3-48*03	IGHD1-26*01	IGHJ4*02	VGGKHDS	7	2.73556	ATGGACATGAGGGTCCCCGCTCAGCTCCTGGGGCTCCTGCTGCTCTGGCTCCCAGGTGCCAAATGTGACATCCAGATGACCCAGTCTCCTTCCACCCTGTCTGCATCTGTGGGAGACAGTGTCACCATCACTTGCCGGGCCAGTCAGAGTATTAGTAGGTGGTTGGCCTGGTATCAGCAAAAACCAGGGAAAGCCCCTAACCTCCTGATCTATGATGCCTCCAGTTTGGAAAGTGGGGTCCCATCAAGGTTCAGCGGCAGTGGATCTGGGACAGAATTCACTCTCACCATCAGCAGCCTGCAGCCTGATGATTCTGCAACTTATTACTGCCAACAGTATAATAGTTTCTGGACGTTCGGCCAAGGGACCAAGGTGGAAATCAAACG	KV1-5	KJ1	QQYNSFWT	8	1.89873
c28807	149812	NN	ATGGAGTTGGGGCTGTGCTGGGTTTTCCTTGTTGCTATTTTAGAAGGTGTCCAGTGTGAGGTGCACCTGGTGGAGTCTGGGGGAGGCTTGGTACAGCCTGGAGGGTCCCTGAGACTCTCCTGTGCAGTCTCTGGATTCACCTTCAGTAGTTATGAAATGAACTGGGTCCGCCAGGCTCCAGGGAAGGGGCTGGAGTGGGTTTCATACATTAGTAGTAGTGCTACTACCATGAAATACGCAGACTCTGTGAAGGGCCGATTCACCATCTCCAGAGACAACGCCAAGAATTCACTGTATCTGCAAATGAACAGCCTGAGAGGCGAGGACACGGCTGTTTATTACTGTGTGGGTGGGAAACATGACTCCTGGGGCCAGGGAACCCTGGTCACCGTCTCCTCA…	IGHV3-48*03	IGHD1-26*01	IGHJ4*02	VGGKHDS	7	2.73556	TAGGGGCTTTCCCTGGTTTTTGCTCATCCCAGGTGCCAAATGTGACATCCAGATGACCCAGTCTCCTTCCACCCTGTCTGCATCTGTGGGAGACAGTGTCACCATCACTTGCCGGGCCAGTCAGAGTATTAGTAGGTGGTTGGCCTGGTATCAGCAAAAACCAGGGAAAGCCCCTAACCTCCTGATCTATGATGCCTCCAGTTTGGAAAGTGGGGTCCCATCAAGGTTCAGCGGCAGTGGATCTGGGACAGAATTCACTCTCACCATCAGCAGCCTGCAGCCTGATGATTCTGCAACTTATTACTGCCAACAGTATAATAGTTTCTGGACGTTCGGCCAAGGGACCAAGGTGGAAATCAAACG	KV1-5	KJ1	QQYNSFWT	8	1.89873
c29207	149812	NN	ATGGAGTTGGGGCTGTGCTGGGTTTTCCTTGTTGCTATTTTAGAAGGTGTCCAGTGTGAGGTGCACCTGGTGGAGTCTGGGGGAGGCTTGGTACAGCCTGGAGGGTCCCTGAGACTCTCCTGTGCAGTCTCTGGATTCACCTTCAGTAGTTATGAAATGAACTGGGTCCGCCAGGCTCCAGGGAAGGGGCTGGAGTGGGTTTCATACATTAGTAGTAGTGCTACTACCATGAAATACGCAGACTCTGTGAAGGGCCGATTCACCATCTCCAGAGACAACGCCAAGAATTCACTGTATCTGCAAATGAACAGCCTGAGAGGCGAGGACACGGCTGTTTATTACTGTGTGGGTGGGAAACATGACTCCTGGGGCCAGGGAACCCTGGTCACCGTCTCCTCA…	IGHV3-48*03	IGHD1-26*01	IGHJ4*02	VGGKHDS	7	2.73556	ATGGACATGAGGGTCCCCGCTCAGCTCCTGGGGCTCCTGCTGCTCTGGCTCCCAGGTGCCAAATGTGACATCCAGATGACCCAGTCTCCTTCCACCCTGTCTGCATCTGTGGGAGACAGTGTCACCATCACTTGCCGGGCCAGTCAGAGTATTAGTAGGTGGTTGGCCTGGTATCAGCAAAAACCAGGGAAAGCCCCTAACCTCCTGATCTATGATGCCTCCAGTTTGGAAAGTGGGGTCCCATCAAGGTTCAGCGGCAGTGGATCTGGGACAGAATTCACTCTCACCATCAGCAGCCTGCAGCCTGATGATTCTGCAACTTATTACTGCCAACAGTATAATAGTTTCTGGACGTTCGGCCAAGGGACCAAGGTGGAAATCAAACG	KV1-5	KJ1	QQYNSFWT	8	1.89873
c28971	149812	NN	ATGGAGTTGGGGCTGTGCTGGGTTTTCCTTGTTGCTATTTTAGAAGGTGTCCAGTGTGAGGTGCACCTGGTGGAGTCTGGGGGAGGCTTGGTACAGCCTGGAGGGTCCCTGAGACTCTCCTGTGCAGTCTCTGGATTCACCTTCAGTAGTTATGAAATGAACTGGGTCCGCCAGGCTCCAGGGAAGGGGCTGGAGTGGGTTTCATACATTAGTAGTAGTGCTACTACCATGAAATACGCAGACTCTGTGAAGGGCCGATTCACCATCTCCAGAGACAACGCCAAGAATTCACTGTATCTGCAAATGAACAGCCTGAGAGGCGAGGACACGGCTGTTTATTACTGTGTGGGTGGGAAACATGACTCCTGGGGCCAGGGAACCCTGGTCACCGTCTCCTCA…	IGHV3-48*03	IGHD1-26*01	IGHJ4*02	VGGKHDS	7	2.73556	ATGGACATGAGGGTCCCCGCTCAGCTCCTGGGGCTCCTGCTGCTCTGGCTCCCAGGTGCCAAATGTGACATCCAGATGACCCAGTCTCCTTCCACCCTGTCTGCATCTGTGGGAGACAGTGTCACCATCACTTGCCGGGCCAGTCAGAGTATTAGTAGGTGGTTGGCCTGGTATCAGCAAAAACCAGGGAAAGCCCCTAACCTCCTGATCTATGATGCCTCCAGTTTGGAAAGTGGGGTCCCATCAAGGTTCAGCGGCAGTGGATCTGGGACAGAATTCACTCTCACCATCAGCAGCCTGCAGCCTGATGATTCTGCAACTTATTACTGCCAACAGTATAATAGTTTCTGGACGTTCGGCCAAGGGACCAAGGTGGAAATCAAACG	KV1-5	KJ1	QQYNSFWT	8	1.89873
c29244	149812	NN	ATGGAGTTGGGGCTGTGCTGGGTTTTCCTTGTTGCTATTTTAGAAGGTGTCCAGTGTGAGGTGCACCTGGTGGAGTCTGGGGGAGGCTTGGTACAGCCTGGAGGGTCCCTGAGACTCTCCTGTGCAGTCTCTGGATTCACCTTCAGTAGTTATGAAATGAACTGGGTCCGCCAGGCTCCAGGGAAGGGGCTGGAGTGGGTTTCATACATTAGTAGTAGTGCTACTACCATGAAATACGCAGACTCTGTGAAGGGCCGATTCACCATCTCCAGAGACAACGCCAAGAATTCACTGTATCTGCAAATGAACAGCCTGAGAGGCGAGGACACGGCTGTTTATTACTGTGTGGGTGGGAAACATGACTCCTGGGGCCAGGGAACCCTGGTCACCGTCTCCTCA…	IGHV3-48*03	IGHD1-26*01	IGHJ4*02	VGGKHDS	7	2.73556	ATGGACATGAGGGTCCCCGCTCAGCTCCTGGGGCTCCTGCTGCTCTGGCTCCCAGGTGCCAAATGTGACATCCAGATGACCCAGTCTCCTTCCACCCTGTCTGCATCTGTGGGAGACAGTGTCACCATCACTTGCCGGGCCAGTCAGAGTATTAGTAGGTGGTTGGCCTGGTATCAGCAAAAACCAGGGAAAGCCCCTAACCTCCTGATCTATGATGCCTCCAGTTTGGAAAGTGGGGTCCCATCAAGGTTCAGCGGCAGTGGATCTGGGACAGAATTCACTCTCACCATCAGCAGCCTGCAGCCTGATGATTCTGCAACTTATTACTGCCAACAGTATAATAGTTTCTGGACGTTCGGCCAAGGGACCAAGGTGGAAATCAAACG	KV1-5	KJ1	QQYNSFWT	8	1.89873
c29071	149812	NN	ATGGAGTTGGGGCTGTGCTGGGTTTTCCTTGTTGCTATTTTAGAAGGTGTCCAGTGTGAGGTGCACCTGGTGGAGTCTGGGGGAGGCTTGGTACAGCCTGGAGGGTCCCTGAGACTCTCCTGTGCAGTCTCTGGATTCACCTTCAGTAGTTATGAAATGAACTGGGTCCGCCAGGCTCCAGGGAAGGGGCTGGAGTGGGTTTCATACATTAGTAGTAGTGCTACTACCATGAAATACGCAGACTCTGTGAAGGGCCGATTCACCATCTCCAGAGACAACGCCAAGAATTCACTGTATCTGCAAATGAACAGCCTGAGAGGCGAGGACACGGCTGTTTATTACTGTGTGGGTGGGAAACATGACTCCTGGGGCCAGGGAACCCTGGTCACCGTCTCCTCA…	IGHV3-48*03	IGHD1-26*01	IGHJ4*02	VGGKHDS	7	2.73556	ATGGACATGAGGGTCCCCGCTCAGCTCCTGGGGCTCCTGCTGCTCTGGCTCCCAGGTGCCAAATGTGACATCCAGATGACCCAGTCTCCTTCCACCCTGTCTGCATCTGTGGGAGACAGTGTCACCATCACTTGCCGGGCCAGTCAGAGTATTAGTAGGTGGTTGGCCTGGTATCAGCAAAAACCAGGGAAAGCCCCTAACCTCCTGATCTATGATGCCTCCAGTTTGGAAAGTGGGGTCCCATCAAGGTTCAGCGGCAGTGGATCTGGGACAGAATTCACTCTCACCATCAGCAGCCTGCAGCCTGATGATTCTGCAACTTATTACTGCCAACAGTATAATAGTTTCTGGACGTTCGGCCAAGGGACCAAGGTGGAAATCAAACG	KV1-5	KJ1	QQYNSFWT	8	1.89873
c28834	149812	NN	ATGGAGTTGGGGCTGTGCTGGGTTTTCCTTGTTGCTATTTTAGAAGGTGTCCAGTGTGAGGTGCACCTGGTGGAGTCTGGGGGAGGCTTGGTACAGCCTGGAGGGTCCCTGAGACTCTCCTGTGCAGTCTCTGGATTCACCTTCAGTAGTTATGAAATGAACTGGGTCCGCCAGGCTCCAGGGAAGGGGCTGGAGTGGGTTTCATACATTAGTAGTAGTGCTACTACCATGAAATACGCAGACTCTGTGAAGGGCCGATTCACCATCTCCAGAGACAACGCCAAGAATTCACTGTATCTGCAAATGAACAGCCTGAGAGGCGAGGACACGGCTGTTTATTACTGTGTGGGTGGGAAACATGACTCCTGGGGCCAGGGAACCCTGGTCACCGTCTCCTCA…	IGHV3-48*03	IGHD1-26*01	IGHJ4*02	VGGKHDS	7	2.73556	ATGGACATGAGGGTCCCCGCTCAGCTCCTGGGGCTCCTGCTGCTCTGGCTCCCAGGTGCCAAATGTGACATCCAGATGACCCAGTCTCCTTCCACCCTGTCTGCATCTGTGGGAGACAGTGTCACCATCACTTGCCGGGCCAGTCAGAGTATTAGTAGGTGGTTGGCCTGGTATCAGCAAAAACCAGGGAAAGCCCCTAACCTCCTGATCTATGATGCCTCCAGTTTGGAAAGTGGGGTCCCATCAAGGTTCAGCGGCAGTGGATCTGGGACAGAATTCACTCTCACCATCAGCAGCCTGCAGCCTGATGATTCTGCAACTTATTACTGCCAACAGTATAATAGTTTCTGGACGTTCGGCCAAGGGACCAAGGTGGAAATCAAACG	KV1-5	KJ1	QQYNSFWT	8	1.89873
c28677	149812	NN	ATGGAGTTGGGGCTGTGCTGGGTTTTCCTTGTTGCTATTTTAGAAGGTGTCCAGTGTGAGGTGCACCTGGTGGAGTCTGGAGGAGGCTTGGTACAGCCTGGAGGGTCCCTGAGACTCTCCTGTGCAGTCTCTGGATTCACCTTCAGTAGTTATGAAATGAACTGGGTCCGCCAGGCTCCAGGGAAGGGGCTGGAGTGGGTTTCATACATTAGTAGTAGTGCTACTACCATGAAATACGCAGACTCTGTGAAGGGCCGATTCACCATCTCCAGAGACAACGCCAAGAATTCACTGTATCTGCAAATGAACAGCCTGAGAGGCGAGGACACGGCTGTTTATTACTGTGTGGGTGGGAAACATGACTCCTGGGGCCAGGGAACCCTGGTCACCGTCTCCTCA…	IGHV3-48*03	IGHD1-26*01	IGHJ4*02	VGGKHDS	7	3.03951	ATGGACATGAGGGTCCCCGCTCAGCTCCTGGGGCTCCTGCTGCTCTGGCTCCCAGGTGCCAAATGTGACATCCAGATGACCCAGTCTCCTTCCACCCTGTCTGCATCTGTGGGAGACAGTGTCACCATCACTTGCCGGGCCAGTCAGAGTATTAGTAGGTGGTTGGCCTGGTATCAGCAAAAACCAGGGAAAGCCCCTAACCTCCTGATCTATGATGCCTCCAGTTTGGAAAGTGGGGTCCCATCAAGGTTCAGCGGCAGTGGATCTGGGACAGAATTCACTCTCACCATCAGCAGCCTGCAGCCTGATGATTCTGCAACTTATTACTGCCAACAGTATAATAGTTTCTGGACGTTCGGCCAAGGGACCAAGGTGGAAATCAAACG	KV1-5	KJ1	QQYNSFWT	8	1.89873
c28740	149812	NN	ATGGAGTTGGGGCTGTGCTGGGTTTTCCTTGTTGCTATTTTAGAAGGTGTCCAGTGTGAGGTGCACCTGGTGGAGTCTGGGGGAGGCTTGGTACAGCCTGGAGGGTCCCTGAGACTCTCCTGTGCAGTCTCTGGATTCACCTTCAGTAGTTATGAAATGAACTGGGTCCGCCAGGCTCCAGGGAAGGGGCTGGAGTGGGTTTCATACATTAGTAGTAGTGCTACTACCATGAAATACGCAGACTCTGTGAAGGGCCGATTCACCATCTCCAGAGACAACGCCAAGAATTCACTGTATCTGCAAATGAACAGCCTGAGAGGCGAGGACACGGCTGTTTATTACTGTGTGGGTGGGAAACATGACTCCTGGGGCCAGGGAACCCTGGTCACCGTCTCCTCA…	IGHV3-48*03	IGHD1-26*01	IGHJ4*02	VGGKHDS	7	2.73556	ATGGACATGAGGGTCCCCGCTCAGCTCCTGGGGCTCCTGCTGCTCTGGCTCCCAGGTGCCAAATGTGACATCCAGATGACCCAGTCTCCTTCCACCCTGTCTGCATCTGTGGGAGACAGTGTCACCATCACTTGCCGGGCCAGTCAGAGTATTAGTAGGTGGTTGGCCTGGTATCAGCAAAAACCAGGGAAAGCCCCTAACCTCCTGATCTATGATGCCTCCAGTTTGGAAAGTGGGGTCCCATCAAGGTTCAGCGGCAGTGGATCTGGGACAGAATTCACTCTCACCATCAGCAGCCTGCAGCCTGATGATTCTGCAACTTATTACTGCCAACAGTATAATAGTTTCTGGACGTTCGGCCAAGGGACCAAGGTGGAAATCAAACG	KV1-5	KJ1	QQYNSFWT	8	1.89873
c28913	149812	NN	ATGGAGTTGGGGCTGTGCTGGGTTTTCCTTGTTGCTATTTTAGAAGGTGTCCAGTGTGAGGTGCACCTGGTGGAGTCTGGGGGAGGCTTGGTACAGCCTGGAGGGTCCCTGAGACTCTCCTGTGCAGTCTCTGGATTCACCTTCAGTAGTTATGAAATGAACTGGGTCCGCCAGGCTCCAGGGAAGGGGCTGGAGTGGGTTTCATACATTAGTAGTAGTGCTACTACCATGAAATACGCAGACTCTGTGAAGGGCCGATTCACCATCTCCAGAGACAACGCCAAGAATTCACTGTATCTGCAAATGAACAGCCTGAGAGGCGAGGACACGGCTGTTTATTACTGTGTGGGTGGGAAACATGACTCCTGGGGCCAGGGAACCCTGGTCACCGTCTCCTCA…	IGHV3-48*03	IGHD1-26*01	IGHJ4*02	VGGKHDS	7	2.73556	ATGGACATGAGGGTCCCCGCTCAGCTCCTGGGGCTCCTGCTGCTCTGGCTCCCAGGTGCCAAATGTGACATCCAGATGACCCAGTCTCCTTCCACCCTGTCTGCATCTGTGGGAGACAGTGTCACCATCACTTGCCGGGCCAGTCAGAGTATTAGTAGGTGGTTGGCCTGGTATCAGCAAAAACCAGGGAAAGCCCCTAACCTCCTGATCTATGATGCCTCCAGTTTGGAAAGTGGGGTCCCATCAAGGTTCAGCGGCAGTGGATCTGGGACAGAATTCACTCTCACCATCAGCAGCCTGCAGCCTGATGATTCTGCAACTTATTACTGCCAACAGTATAATAGTTTCTGGACGTTCGGCCAAGGGACCAAGGTGGAAATCAAACG	KV1-5	KJ1	QQYNSFWT	8	1.89873
c28779	149812	NN	ATGGAGTTGGGGCTGTGCTGGGTTTTCCTTGTTGCTATTTTAGAAGGTGTCCAGTGTGAGGTGCACCTGGTGGAGTCTGGGGGAGGCTTGGTACAGCCTGGAGGGTCCCTGAGACTCTCCTGTGCAGTCTCTGGATTCACCTTCAGTAGTTATGAAATGAACTGGGTCCGCCAGGCTCCAGGGAAGGGGCTGGAGTGGGTTTCATACATTAGTAGTAGTGCTACTACCATGAAATACGCAGACTCTGTGAAGGGCCGATTCACCATCTCCAGAGACAACGCCAAGAATTCACTGTATCTGCAAATGAACAGCCTGAGAGGCGAGGACACGGCTGTTTATTACTGTGTGGGTGGGAAACATGACTCCTGGGGCCAGGGAACCCTGGTCACCGTCTCCTCA…	IGHV3-48*03	IGHD1-26*01	IGHJ4*02	VGGKHDS	7	2.73556	ATGGAAACCCCAGCGCAGCTTCTCTTCCTCCTGCTACTCTGGCTCCCAGATACCACCGGAGAAATTGTGTTGACGCAGTCTCCAGGCACCCTGTCTTTGTCTCCAGGGGAAAGAGCCACACTCTCCTGCAGGGCCAGTCAGATTATTAGCAACAACTACTTAGCCTGGTACCAGCAGAAACCTGGCCAGGCTCCCAGGGTCCTCATCTATGGTGCATCCAGCAGGGTCTCTGGCATCCCAGACAGGTTCCGTGGCAGTGGGTCTGGGACAGACTTCACTCTCACCATCAGTAGACTGGAGCCTGAAGATTTTGCAGTGTATTACTGTCAGAAGTATGGTGGCTCACCGTGGACGTTCGGCCAAGGGACCAAGGTGGAAATCAAACG	KV3-20	KJ1	QKYGGSPWT	9	3.7037
c29007	149812	NN	ATGGAGTTGGGGCTGTGCTGGGTTTTCCTTGTTGCTATTTTAGAAGGTGTCCAGTGTGAGGTGCACCTGGTGGAGTCTGGGGGAGGCTTGGTACAGCCTGGAGGGTCCCTGAGACTCTCCTGTGCAGTCTCTGGATTCACCTTCAGTAGTTATGAAATGAACTGGGTCCGCCAGGCTCCAGGGAAGGGGCTGGAGTGGGTTTCATACATTAGTAGTAGTGCTACTACCATGAAATACGCAGACTCTGTGAAGGGCCGATTCACCATCTCCAGAGACAACGCCAAGAATTCACTGTATCTGCAAATGAACAGCCTGAGAGGCGAGGACACGGCTGTTTATTACTGTGTGGGTGGGAAACATGACTCCTGGGGCCAGGGAACCCTGGTCACCGTCTCCTCA…	IGHV3-48*03	IGHD1-26*01	IGHJ4*02	VGGKHDS	7	2.73556	ATGGAAACCCCAGCGCAGCTTCTCTTCCTCCTGCTACTCTGGCTCCCAGATACCACCGGAGAAATTGTGTTGGCGCAGTCTCCAGGCACCCTGTCTTTGTCTCCAGGGGAAAGAGCCTCCCTCTCCTGCAGGGCCAGTCAGAGTGTTACCAACACCTTCTTAGCCTGGTACCAGCAGAAACCTGGCCAGGCTCCCAGGCTCCTCATCTATGGTGCATCCAGCAGGGCCACTGGCATCCCAGACAGGTTCAGTGGCAGTGGGTCTGGGACAGACTTCACTCTCACCATCAGCAGACTGGAGCCTGAAGATTTTGCAGTGTATTTCTGTCAGCAGTATGGTAGCTCACCTCTCACTTTCGGCGGAGGGACCAAGGTGGAGATCAAACG	KV3-20	KJ4	QQYGSSPLT	9	2.16049
c28942	149812	NN	ATGGGGTCAACCGCCATCCTCGCCCTCCTCCTGGCTGTTCTCCAAGGAGTCTGTGCCGAGGTGCAACTGGTGCAGTCTGGGGCAGAGGTGAAAAAGCCCGGGGAGTCTCTGAGGATCTCGTGTAAGAGTTCTGGATACACCTATGCCACCTACTGGATCGGCTGGGTGCGCCAGATGCCCGGGAAAGGCCTGGAGTGGATGGGAATCATCTATCCTGGTGACTCTGATACCAGATATAGCCCGTCCTTCCAAGGCCAGGTCTCCATCTCCGCCGACAAGTCCGTCAGCACCGCCTACCTGCAGTGGAGGAGCCTGAAGGCCTCGGACACCGCCATATATTACTGTGCGAGAGGAGATGTGGCGCCGGAGAAATACTATGATAAGAGTGCTTATCACCTT…	IGHV5-51*01	IGHD3-22*01	IGHJ4*02	ARGDVAPEKYYDKSAYHLHTLEH	23	5.24691	ATGAGGCTCCCTGCTCAGCTCCTGGGGCTGCTAATGCTCTGGGTCTCTGGATCCAGTGGGGACACTGTGATGACTCAGTCTCCACTCTCCCTGCCCGTCATCCCTGGAGAGCCGGCCTCCATCTCCTGCAGGTCTAGTCAGAGCCTCCTGCATAGTAATGGGAACAACTATTTGGATTGGTACCTGCAGAAGCCAGGGCAGTCTCCACAACTCCTGATCTATTTGGCTTCTAATCGGGCCTCCGGGGTCCCTGACAGGTTCAGTGGCAGTGGATCAGGCACAGATTTTACACTGAAGATCAGCAGAGTGGAGGCTGAGGATGTTGGGGTTTATTACTGCATGCAAGGTCTACAGACGGGGACTTTTGGCCAGGGGACCAAGCTGGAGATCAAACG	KV2-28	KJ2	MQGLQTGT	8	3.03951
c28678	149812	NN	ATGGGGTCAACCGCCATCCTCGCCCTCCTCCTGGCTGTTCTCCAAGGAGTCTGTGCCGAGGTGCAACTGGTGCAGTCTGGGGCAGAGGTGAAAAAGCCCGGGGAGTCTCTGAGGATCTCGTGTAAGAGTTCTGGATACACCTATGCCACCTACTGGATCGGCTGGGTGCGCCAGATGCCCGGGAAAGGCCTGGAGTGGATGGGAATCATCTATCCTGGTGACTCTGATACCAGATATAGCCCGTCCTTCCAAGGCCAGGTCTCCATCTCCGCCGACAAGTCCGTCAGCACCGCCTACCTGCAGTGGAGGAGCCTGAAGGCCTCGGACACCGCCATATATTACTGTGCGAGAGGAGATGTGGCGCCGGAGAAATACTATGATAAGAGTGCTTATCACCTT…	IGHV5-51*01	IGHD3-22*01	IGHJ4*02	ARGDVAPEKYYDKSAYHLHTLEH	23	4.93827	ATGAGGCTCCCTGCTCAGCTCCTGGGGCTGCTAATGCTCTGGGTCTCTGGATCCAGTGGGGACACTGTGATGACTCAGTCTCCACTCTCCCTGCCCGTCATCCCTGGAGAGCCGGCCTCCATCTCCTGCAGGTCTAGTCAGAGCCTCCTGCATAGTAATGGGAACAACTATTTGGATTGGTACCTGCAGAAGCCAGGGCAGTCTCCACAACTCCTGATCTATTTGGCTTCTAATCGGGCCTCCGGGGTCCCTGACAGGTTCAGTGGCAGTGGATCAGGCACAGATTTTACACTGAAGATCAGCAGAGTGGAGGCTGAGGATGTTGGGGTTTATTACTGCATGCAAGGTCTACAGACGGGGACTTTTGGCCAGGGGACCAAGCTGGAGATCAAACG	KV2-28	KJ2	MQGLQTGT	8	3.03951
c29121	149812	NN	ATGGGGTCAACCGCCATCCTCGCCCTCCTCCTGGCTGTTCTCCAAGGAGTCTGTGCCGAGGTGCAACTGGTGCAGTCTGGGGCAGAGGTGAAAAAGCCCGGGGAGTCTCTGAGGATCTCGTGTAAGAGTTCTGGATACACCTATGCCACCTACTGGATCGGCTGGGTGCGCCAGATGCCCGGGAAAGGCCTGGAGTGGATGGGAATCATCTATCCTGGTGACTCTGATACCAGATATAGCCCGTCCTTCCAAGGCCAGGTCTCCATCTCCGCCGACAAGTCCGTCAGCACCGCCTACCTGCAGTGGAGGAGCCTGAAGGCCTCGGACACCGCCATATATTACTGTGCGAGAGGAGATGTGGCGCCGGAGAAATACTATGATAAGAGTGCTTATCACCTT…	IGHV5-51*01	IGHD3-22*01	IGHJ4*02	ARGDVAPEKYYDKSAYHLHTLEH	23	5.24691	ATGAGGCTCCCTGCTCAGCTCCTGGGGCTGCTAATGCTCTGGGTCTCTGGATCCAGTGGGGACACTGTGATGACTCAGTCTCCACTCTCCCTGCCCGTCATCCCTGGAGAGCCGGCCTCCATCTCCTGCAGGTCTAGTCAGAGCCTCCTGCATAGTAATGGGAACAACTATTTGGATTGGTACCTGCAGAAGCCAGGGCAGTCTCCACAACTCCTGATCTATTTGGCTTCTAATCGGGCCTCCGGGGTCCCTGACAGGTTCAGTGGCAGTGGATCAGGCACAGATTTTACACTGAAGATCAGCAGAGTGGAGGCTGAGGATGTTGGGGTTTATTACTGCATGCAAGGTCTACAGACGGGGACTTTTGGCCAGGGGACCAAGCTGGAGATCAAACG	KV2-28	KJ2	MQGLQTGT	8	3.03951
c28721	149812	NN	ATGGACCTCCTGCACAAGAACATGAAACACCTGTGGTTCTTCCTCCTCCTGGTGGCAGCTCCCAGATGGGTCCTGTCCCAGGTGCACCTACAGCAGTGGGGCGCCGGACTGTTGAAGCCTTCGGAGACCCTGTCCCTCACCTGCGCTGTCTATGGTGGGTCCTTCAATAATTACTACTGGACCTGGATCCGCCAGCCCCCAGGGAAGGGGCTGCAGTGGATTGGGGAAATCAATCATAGTGGAAGCACCACCTACAACCCGTCTCTCAAGAGTCGAGTCAGCGTATCAGCAGACACGTCGAAGAACCAGTTCTCCCTGAAACTTAACTCTGTGACCGCCGCGGACACGGGTATCTATTACTGTGCGAGAAGGGTGGGCGAATTTAGCAGTGGCTGGTTT…	IGHV4-34*01	IGHD6-19*01	IGHJ6*02	ARRVGEFSSGWFPRGYYYGMDV	22	6.14035	ATGGTGTTGCAGACCCAGGTCTTCATTTCTCTGTTGCTCTGGATCTCTGGTGCCTACGGGGACATCGTAATGACCCAGTCTCCAGACTCCCTGGCTGTGTCTCTGGGCGAGAGGGCCACCATCAACTGCAAGTCCAGCCAGAGTGTTTTATACAGCTCCAACAATAAGAACTTCTTAGCTTGGTACCAACAAAAACCAGGACAGCCTCCTAAGCTGCTCATTTTCTGGGCATCTACCCGGCAATCCGGGGTCCCTGACCGATTCAGTGGCAGCGGGTCTGGGACAGACTTCACTCTCACCATCAGCAGCCTGCAGGCTGAAGATGTGGCAGTTTATTACTGTCAGCAATATTATTATGTTCCTCAGACGTTCGGCCAAGGGACCAAGGTGGAAATCAAA…	KV4-1	KJ1	QQYYYVPQT	9	3.25444
c28912	149812	NN	ATGGAACTGGGGCTCCGCTGGGTTTTCCTTGTTGCTATTTTAGAAGGTGTCCAGTGTGAGGTGCAGCTGGTGGAGTCTGGGGGAGGCCTGGTCAAGCCTGGGGGGTCCCTGAGACTCTCCTGTGCAGCCTCTGGATTCACCTTCAGTACTTATACCATGAACTGGGTCCGCCAGGCTCCAGGGAAGGGGCTGGAGTGGGTCTCATCCATTAATAGTGTTAGTAGTTACATAAACTACGCAGACTCAGTGAAGGGCCGATTCACCTTCTCCAGAGACAACGCCAAGAACTCACTGTATCTGCAAATGAACAGCCTGAGAGCCGAGGACACGGCTGTGTATTACTGTGCGCGAGATGGTGACTACGCAAACTTTGACTACTGGGGCCAGGGAACCCTGGTC…	IGHV3-21*01	IGHD4-17*01	IGHJ4*02	ARDGDYANFDY	11	2.64706	ATGACCTGCTCCCCTCTCCTCCTCACCCTTCTCATTCACTGCACAGGGTCCTGGGCCCAGTCTGTGTTGACGCAGCCGCCCTCAGTGTCTGCGGCCCCAGGACAGAAGGTCACCATCTCCTGCTCTGGAAGCAGCTCCAACATTGGGAATAATTATGTATCCTGGTACCAGCAGCTCCCAGGAACAGCCCCCAAGCTCCTCATTTATGACAGTAATAGGCGTCCCTCAGGGATTCCTGACCGATTCTCTGGCTCCAAGTCTGGCACGTCAGCCACCCTGGGCATCACCGGACTCCAGACTGGGGACGAGGCCGATTATTACTGCGGAACATGGGATAGCAGCCTGAGTGGCAGGGTGTTCGGCGGAGGGACCAAGCTGACCGTCCTAGG	LV1-51	LJ3	GTWDSSLSGRV	11	1.22324
c28928	149812	NN	ATGGAACTGGGGCTCCGCTGGGTTTTCCTTGTTGCTATTTTAGAAGGTGTCCAGTGTGAGGTGCAGCTGGTGGAGTCTGGGGGAGGCCTGGTCAAGCCTGGGGGGTCCCTGAGACTCTCCTGTGCAGCCTCTGGATTCACCTTCAGTACTTATACCATGAACTGGGTCCGCCAGGCTCCAGGGAAGGGGCTGGAGTGGGTCTCATCCATTAATAGTGTTAGTAGTTACATAAACTACGCAGACTCAGTGAAGGGCCGATTCACCTTCTCCAGAGACAACGCCAAGAACTCACTGTATCTGCAAATGAACAGCCTGAGAGCCGAGGACACGGCTGTGTATTACTGTGCGCGAGATGGTGACTACGCAAACTTTGACTACTGGGGCCAGGGAACCCTGGTC…	IGHV3-21*01	IGHD4-17*01	IGHJ4*02	ARDGDYANFDY	11	2.64706	ATGACCTGCTCCCCTCTCCTCCTCACCCTTCTCATTCACTGCACAGGGTCCTGGGCCCAGTCTGTGTTGACGCAGCCGCCCTCAGTGTCTGCGGCCCCAGGACAGAAGGTCACCATCTCCTGCTCTGGAAGCAGCTCCAACATTGGGAATAATTATGTATCCTGGTACCAGCAGCTCCCAGGAACAGCCCCCAAGCTCCTCATTTATGACAGTAATAGGCGTCCCTCAGGGATTCCTGACCGATTCTCTGGCTCCAAGTCTGGCACGTCAGCCACCCTGGGCATCACCGGACTCCAGACTGGGGACGAGGCCGATTATTACTGCGGAACATGGGATAGCAGCCTGAGTGGCAGGGTGTTCGGCGGAGGGACCAAGCTGACCGTCCTAGG	LV1-51	LJ3	GTWDSSLSGRV	11	1.22324
c28896	149812	NN	ATGGAACTGGGGCTCCGCTGGGTTTTCCTTGTTGCTATTTTAGAAGGTGTCCAGTGTGAGGTGCAGCTGGTGGAGTCTGGGGGAGGCCTGGTCAAGCCTGGGGGGTCCCTGAGACTCTCCTGTGCAGCCTCTGGATTCACCTTCAGTACTTATACCATGAACTGGGTCCGCCAGGCTCCAGGGAAGGGGCTGGAGTGGGTCTCATCCATTAATAGTGTTAGTAGTTACATAAACTACGCAGACTCAGTGAAGGGCCGATTCACCTTCTCCAGAGACAACGCCAAGAACTCACTGTATCTGCAAATGAACAGCCTGAGAGCCGAGGACACGGCTGTGTATTACTGTGCGCGAGATGGTGACTACGCAAACTTTGACTACTGGGGCCAGGGAACCCTGGTC…	IGHV3-21*01	IGHD4-17*01	IGHJ4*02	ARDGDYANFDY	11	2.64706	ATGACCTGCTCCCCTCTCCTCCTCACCCTTCTCATTCACTGCACAGGGTCCTGGGCCCAGTCTGTGTTGACGCAGCCGCCCTCAGTGTCTGCGGCCCCAGGACAGAAGGTCACCATCTCCTGCTCTGGAAGCAGCTCCAACATTGGGAATAATTATGTATCCTGGTACCAGCAGCTCCCAGGAACAGCCCCCAAGCTCCTCATTTATGACAGTAATAGGCGTCCCTCAGGGATTCCTGACCGATTCTCTGGCTCCAAGTCTGGCACGTCAGCCACCCTGGGCATCACCGGACTCCAGACTGGGGACGAGGCCGATTATTACTGCGGAACATGGGATAGCAGCCTGAGTGGCAGGGTGTTCGGCGGAGGGACCAAGCTGACCGTCCTAGG	LV1-51	LJ3	GTWDSSLSGRV	11	1.22324
c28911	149812	NN	ATGGACTGGACCTGGAGGATCCTCTTCTTGGTGGCAGCAGCCACAGGAGCCCACTCCCAGGTGCAGCTGGTGCAGTCTGGGGCTGAGGTGAAGAAGCCTGGGGCCTCAGTGAAGGTCTCCTGCAAGACTTCTGAATACACCTTCACCGACTACTATGTGCACTGGGTGCGACAGGCCCCTGGACAAGGGCTTGAGTGGATGGGATGGATCAACCCTAACAGTGGTGGCACAAACTATGCACAGAAGTTTCAGGGCAGGGTCACCATGACCAGGGACACGTCCATCACCACAGCCTACATGGAGTTGAGCAGGCTGACATCTGACGACACGGCCGTGTATTACTGTGTGAGAGAACTGCCGGGTATAGCAGTGGCTGGTACGAACTACTGGGGCCAGGGA…	IGHV1-2*02	IGHD6-19*01	IGHJ4*02	VRELPGIAVAGTNY	14	2.39521	ATGGACATGAGGGTCCCCGCTCAGCTCCTGGGGCTCCTGCTACTCTGGCTCCGAGGTGCCAGATGTGACATCCAGATGACCCAGTCTCCATCCTCCCTGTCTGCATCTGTAGGAGACAGAGTCACCATCACTTGCCGGACAAGTCAGAGCATTAGCAGGTATTTAAATTGGTATCAGCAAAAACCAGGGAAAGCCCCTAAGCTCCTGATCTATGCGGCATCCAGTTTGCAAAGTGGGGTCCCATCAAAGTTCAGTGGCAGTGGATCTGGGACAGATTTCACTCTCACCATCAGCAGTCTGCAACCTGAAGATTTTGCAACTTACTACTGTCAACAGAGTTACAGTACCCCTCGAACTTTTGGCCAGGGGACCAAGCTGGAGATCAAACG	KV1-39	KJ2	QQSYSTPRT	9	1.5674
c29132	149812	NN	ATGGACTGGACCTGGAGGATCCTCTTCTTGGTGGCAGCAGCCACAGGAGCCCACTCCCAGGTGCAGCTGGTGCAGTCTGGGGCTGAGGTGAAGAAGCCTGGGGCCTCAGTGAAGGTCTCCTGCAAGACTTCTGAATACACCTTCACCGACTACTATGTGCACTGGGTGCGACAGGCCCCTGGACAAGGGCTTGAGTGGATGGGATGGATCAACCCTAACAGTGGTGGCACAAACTATGCACAGAAGTTTCAGGGCAGGGTCACCATGACCAGGGACACGTCCATCACCACAGCCTACATGGAGTTGAGCAGGCTGACATCTGACGACACGGCCGTGTATTACTGTGTGAGAGAACTGCCGGGTATAGCAGTGGCTGGTACGAACTACTGGGGCCAGGGA…	IGHV1-2*02	IGHD6-19*01	IGHJ4*02	VRELPGIAVAGTNY	14	2.39521	ATGGACATGAGGGTCCCCGCTCAGCTCCTGGGGCTCCTGCTACTCTGGCTCCGAGGTGCCAGATGTGACATCCAGATGACCCAGTCTCCATCCTCCCTGTCTGCATCTGTAGGAGACAGAGTCACCATCACTTGCCGGACAAGTCAGAGCATTAGCAGGTATTTAAATTGGTATCAGCAAAAACCAGGGAAAGCCCCTAAGCTCCTGATCTATGCGGCATCCAGTTTGCAAAGTGGGGTCCCATCAAAGTTCAGTGGCAGTGGATCTGGGACAGATTTCACTCTCACCATCAGCAGTCTGCAACCTGAAGATTTTGCAACTTACTACTGTCAACAGAGTTACAGTACCCCTCGAACTTTTGGCCAGGGGACCAAGCTGGAGATCAAACG	KV1-39	KJ2	QQSYSTPRT	9	1.5674
c28926	149812	NN	ATGGACTGGACCTGGAGGATCCTCTTCTTGGTGGCAGCAGCCACAGGAGCCCACTCCCAGGTGCAGCTGGTGCAGTCTGGGGCTGAGGTGAAGAAGCCTGGGGCCTCAGTGAAGGTCTCCTGCAAGACTTCTGAATACACCTTCACCGACTACTATGTGCACTGGGTGCGACAGGCCCCTGGACAAGGGCTTGAGTGGATGGGATGGATCAACCCTAACAGTGGTGGCACAAACTATGCACAGAAGTTTCAGGGCAGGGTCACCATGACCAGGGACACGTCCATCACCACAGCCTACATGGAGTTGAGCAGGCTGACATCTGACGACACGGCCGTGTATTACTGTGTGAGAGAACTGCCGGGTATAGCAGTGGCTGGTACGAACTACTGGGGCCAGGGA…	IGHV1-2*02	IGHD6-19*01	IGHJ4*02	VRELPGIAVAGTNY	14	2.39521	ATGGACATGAGGGTCCCCGCTCAGCTCCTGGGGCTCCTGCTACTCTGGCTCCGAGGTGCCAGATGTGACATCCAGATGACCCAGTCTCCATCCTCCCTGTCTGCATCTGTAGGAGACAGAGTCACCATCACTTGCCGGACAAGTCAGAGCATTAGCAGGTATTTAAATTGGTATCAGCAAAAACCAGGGAAAGCCCCTAAGCTCCTGATCTATGCGGCATCCAGTTTGCAAAGTGGGGTCCCATCAAAGTTCAGTGGCAGTGGATCTGGGACAGATTTCACTCTCACCATCAGCAGTCTGCAACCTGAAGATTTTGCAACTTACTACTGTCAACAGAGTTACAGTACCCCTCGAACTTTTGGCCAGGGGACCAAGCTGGAGATCAAACG	KV1-39	KJ2	QQSYSTPRT	9	1.5674
c28741	149812	NN	ATGGACTGGACCTGGAGGATCCTCTTCTTGGTGGCAGCAGCCACAGGAGCCCACTCCCAGGTGCAGCTGGTGCAGTCTGGGGCTGAGGTGAAGAAGCCTGGGGCCTCAGTGAAGGTCTCCTGCAAGACTTCTGAATACACCTTCACCGACTACTATGTGCACTGGGTGCGACAGGCCCCTGGACAAGGGCTTGAGTGGATGGGATGGATCAACCCTAACAGTGGTGGCACAAACTATGCACAGAAGTTTCAGGGCAGGGTCACCATGACCAGGGACACGTCCATCACCACAGCCTACATGGAGTTGAGCAGGCTGACATCTGACGACACGGCCGTGTATTACTGTGTGAGAGAACTGCCGGGTATAGCAGTGGCTGGTACGAACTACTGGGGCCAGGGA…	IGHV1-2*02	IGHD6-19*01	IGHJ4*02	VRELPGIAVAGTNY	14	2.39521	ATGGACATGAGGGTCCCCGCTCAGCTCCTGGGGCTCCTGCTACTCTGGCTCCGAGGTGCCAGATGTGACATCCAGATGACCCAGTCTCCATCCTCCCTGTCTGCATCTGTAGGAGACAGAGTCACCATCACTTGCCGGACAAGTCAGAGCATTAGCAGGTATTTAAATTGGTATCAGCAAAAACCAGGGAAAGCCCCTAAGCTCCTGATCTATGCGGCATCCAGTTTGCAAAGTGGGGTCCCATCAAAGTTCAGTGGCAGTGGATCTGGGACAGATTTCACTCTCACCATCAGCAGTCTGCAACCTGAAGATTTTGCAACTTACTACTGTCAACAGAGTTACAGTACCCCTCGAACTTTTGGCCAGGGGACCAAGCTGGAGATCAAACG	KV1-39	KJ2	QQSYSTPRT	9	1.5674
c29247	149812	NN	ATGGACTGGACCTGGAGGATCCTCTTCTTGGTGGCAGCAGCCACAGGAGCCCACTCCCAGGTGCAGCTGGTGCAGTCTGGGGCTGAGGTGAAGAAGCCTGGGGCCTCAGTGAAGGTCTCCTGCAAGACTTCTGAATACACCTTCACCGACTACTATGTGCACTGGGTGCGACAGGCCCCTGGACAAGGGCTTGAGTGGATGGGATGGATCAACCCTAACAGTGGTGGCACAAACTATGCACAGAAGTTTCAGGGCAGGGTCACCATGACCAGGGACACGTCCATCACCACAGCCTACATGGAGTTGAGCAGGCTGACATCTGACGACACGGCCGTGTATTACTGTGTGAGAGAACTGCCGGGTATAGCAGTGGCTGGTACGAACTACTGGGGCCAGGGA…	IGHV1-2*02	IGHD6-19*01	IGHJ4*02	VRELPGIAVAGTNY	14	2.39521	ATGGACATGAGGGTCCCCGCTCAGCTCCTGGGGCTCCTGCTACTCTGGCTCCGAGGTGCCAGATGTGACATCCAGATGACCCAGTCTCCATCCTCCCTGTCTGCATCTGTAGGAGACAGAGTCACCATCACTTGCCGGACAAGTCAGAGCATTAGCAGGTATTTAAATTGGTATCAGCAAAAACCAGGGAAAGCCCCTAAGCTCCTGATCTATGCGGCATCCAGTTTGCAAAGTGGGGTCCCATCAAAGTTCAGTGGCAGTGGATCTGGGACAGATTTCACTCTCACCATCAGCAGTCTGCAACCTGAAGATTTTGCAACTTACTACTGTCAACAGAGTTACAGTACCCCTCGAACTTTTGGCCAGGGGACCAAGCTGGAGATCAAACG	KV1-39	KJ2	QQSYSTPRT	9	1.5674
c29229	149812	NN	ATGGACTGGACCTGGAGGATCCTCTTCTTGGTGGCAGCAGCCACAGGAGCCCACTCCCAGGTGCAGCTGGTGCAGTCTGGGGCTGAGGTGAAGAAGCCTGGGGCCTCAGTGAAGGTCTCCTGCAAGACTTCTGAATACACCTTCACCGACTACTATGTGCACTGGGTGCGACAGGCCCCTGGACAAGGGCTTGAGTGGATGGGATGGATCAACCCTAACAGTGGTGGCACAAACTATGCACAGAAGTTTCAGGGCAGGGTCACCATGACCAGGGACACGTCCATCACCACAGCCTACATGGAGTTGAGCAGGCTGACATCTGACGACACGGCCGTGTATTACTGTGTGAGAGAACTGCCGGGTATAGCAGTGGCTGGTACGAACTACTGGGGCCAGGGA…	IGHV1-2*02	IGHD6-19*01	IGHJ4*02	VRELPGIAVAGTNY	14	2.39521	ATGGACATGAGGGTCCCCGCTCAGCTCCTGGGGCTCCTGCTACTCTGGCTCCGAGGTGCCAGATGTGACATCCAGATGACCCAGTCTCCATCCTCCCTGTCTGCATCTGTAGGAGACAGAGTCACCATCACTTGCCGGACAAGTCAGAGCATTAGCAGGTATTTAAATTGGTATCAGCAAAAACCAGGGAAAGCCCCTAAGCTCCTGATCTATGCGGCATCCAGTTTGCAAAGTGGGGTCCCATCAAAGTTCAGTGGCAGTGGATCTGGGACAGATTTCACTCTCACCATCAGCAGTCTGCAACCTGAAGATTTTGCAACTTACTACTGTCAACAGAGTTACAGTACCCCTCGAACTTTTGGCCAGGGGACCAAGCTGGAGATCAAACG	KV1-39	KJ2	QQSYSTPRT	9	1.5674
c28840	149812	NN	ATGGACTGGACCTGGAGGATCCTCTTCTTGGTGGCAGCAGCCACAGGAGCCCACTCCCAGGTGCAGCTGGTGCAGTCTGGGGCTGAGGTGAAGAAGCCTGGGGCCTCAGTGAAGGTCTCCTGCAAGACTTCTGAATACACCTTCACCGACTACTATGTGCACTGGGTGCGACAGGCCCCTGGACAAGGGCTTGAGTGGATGGGATGGATCAACCCTAACAGTGGTGGCACAAACTATGCACAGAAGTTTCAGGGCAGGGTCACCATGACCAGGGACACGTCCATCACCACAGCCTACATGGAGTTGAGCAGGCTGACATCTGACGACACGGCCGTGTATTACTGTGTGAGAGAACTGCCGGGTATAGCAGTGGCTGGTACGAACTACTGGGGCCAGGGA…	IGHV1-2*02	IGHD6-19*01	IGHJ4*02	VRELPGIAVAGTNY	14	2.39521	ATGGACATGAGGGTCCCCGCTCAGCTCCTGGGGCTCCTGCTACTCTGGCTCCGAGGTGCCAGATGTGACATCCAGATGACCCAGTCTCCATCCTCCCTGTCTGCATCTGTAGGAGACAGAGTCACCATCACTTGCCGGACAAGTCAGAGCATTAGCAGGTATTTAAATTGGTATCAGCAAAAACCAGGGAAAGCCCCTAAGCTCCTGATCTATGCGGCATCCAGTTTGCAAAGTGGGGTCCCATCAAAGTTCAGTGGCAGTGGATCTGGGACAGATTTCACTCTCACCATCAGCAGTCTGCAACCTGAAGATTTTGCAACTTACTACTGTCAACAGAGTTACAGTACCCCTCGAACTTTTGGCCAGGGGACCAAGCTGGAGATCAAACG	KV1-39	KJ2	QQSYSTPRT	9	1.5674
c28940	149812	NN	ATGGACTGGACCTGGAGGATCCTCTTCTTGGTGGCAGCAGCCACAGGAGCCCACTCCCAGGTGCAGCTGGTGCAGTCTGGGGCTGAGGTGAAGAAGCCTGGGGCCTCAGTGAAGGTCTCCTGCAAGACTTCTGAATACACCTTCACCGACTACTATGTGCACTGGGTGCGACAGGCCCCTGGACAAGGGCTTGAGTGGATGGGATGGATCAACCCTAACAGTGGTGGCACAAACTATGCACAGAAGTTTCAGGGCAGGGTCACCATGACCAGGGACACGTCCATCACCACAGCCTACATGGAGTTGAGCAGGCTGACATCTGACGACACGGCCGTGTATTACTGTGTGAGAGAACTGCCGGGTATAGCAGTGGCTGGTACGAACTACTGGGGCCAGGGA…	IGHV1-2*02	IGHD6-19*01	IGHJ4*02	VRELPGIAVAGTNY	14	2.39521	ATGGACATGAGGGTCCCCGCTCAGCTCCTGGGGCTCCTGCTACTCTGGCTCCGAGGTGCCAGATGTGACATCCAGATGACCCAGTCTCCATCCTCCCTGTCTGCATCTGTAGGAGACAGAGTCACCATCACTTGCCGGACAAGTCAGAGCATTAGCAGGTATTTAAATTGGTATCAGCAAAAACCAGGGAAAGCCCCTAAGCTCCTGATCTATGCGGCATCCAGTTTGCAAAGTGGGGTCCCATCAAAGTTCAGTGGCAGTGGATCTGGGACAGATTTCACTCTCACCATCAGCAGTCTGCAACCTGAAGATTTTGCAACTTACTACTGTCAACAGAGTTACAGTACCCCTCGAACTTTTGGCCAGGGGACCAAGCTGGAGATCAAACG	KV1-39	KJ2	QQSYSTPRT	9	1.5674
c28965	149812	NN	ATGGACTGGACCTGGAGGATCCTCTTCTTGGTGGCAGCAGCCACAGGAGCCCACTCCCAGGTGCAGCTGGTGCAGTCTGGGGCTGAGGTGAAGAAGCCTGGGGCCTCAGTGAAGGTCTCCTGCAAGACTTCTGAATACACCTTCACCGACTACTATGTGCACTGGGTGCGACAGGCCCCTGGACAAGGGCTTGAGTGGATGGGATGGATCAACCCTAACAGTGGTGGCACAAACTATGCACAGAAGTTTCAGGGCAGGGTCACCATGACCAGGGACACGTCCATCACCACAGCCTACATGGAGTTGAGCAGGCTGACATCTGACGACACGGCCGTGTATTACTGTGTGAGAGAACTGCCGGGTATAGCAGTGGCTGGTACGAACTACTGGGGCCAGGGA…	IGHV1-2*02	IGHD6-19*01	IGHJ4*02	VRELPGIAVAGTNY	14	2.39521	ATGGACATGAGGGTCCCCGCTCAGCTCCTGGGGCTCCTGCTACTCTGGCTCCGAGGTGCCAGATGTGACATCCAGATGACCCAGTCTCCATCCTCCCTGTCTGCATCTGTAGGAGACAGAGTCACCATCACTTGCCGGACAAGTCAGAGCATTAGCAGGTATTTAAATTGGTATCAGCAAAAACCAGGGAAAGCCCCTAAGCTCCTGATCTATGCGGCATCCAGTTTGCAAAGTGGGGTCCCATCAAAGTTCAGTGGCAGTGGATCTGGGACAGATTTCACTCTCACCATCAGCAGTCTGCAACCTGAAGATTTTGCAACTTACTACTGTCAACAGAGTTACAGTACCCCTCGAACTTTTGGCCAGGGGACCAAGCTGGAGATCAAACG	KV1-39	KJ2	QQSYSTPRT	9	1.5674
c28760	149812	NN	ATGGACTGGACCTGGAGGATCCTCTTCTTGGTGGCAGCAGCCACAGGAGCCCACTCCCAGGTGCAGCTGGTGCAGTCTGGGGCTGAGGTGAAGAAGCCTGGGGCCTCAGTGAAGGTCTCCTGCAAGACTTCTGAATACACCTTCACCGACTACTATGTGCACTGGGTGCGACAGGCCCCTGGACAAGGGCTTGAGTGGATGGGATGGATCAACCCTAACAGTGGTGGCACAAACTATGCACAGAAGTTTCAGGGCAGGGTCACCATGACCAGGGACACGTCCATCACCACAGCCTACATGGAGTTGAGCAGGCTGACATCTGACGACACGGCCGTGTATTACTGTGTGAGAGAACTGCCGGGTATAGCAGTGGCTGGTACGAACTACTGGGGCCAGGGA…	IGHV1-2*02	IGHD6-19*01	IGHJ4*02	VRELPGIAVAGTNY	14	2.39521	ATGGACATGAGGGTCCCCGCTCAGCTCCTGGGGCTCCTGCTACTCTGGCTCCGAGGTGCCAGATGTGACATCCAGATGACCCAGTCTCCATCCTCCCTGTCTGCATCTGTAGGAGACAGAGTCACCATCACTTGCCGGACAAGTCAGAGCATTAGCAGGTATTTAAATTGGTATCAGCAAAAACCAGGGAAAGCCCCTAAGCTCCTGATCTATGCGGCATCCAGTTTGCAAAGTGGGGTCCCATCAAAGTTCAGTGGCAGTGGATCTGGGACAGATTTCACTCTCACCATCAGCAGTCTGCAACCTGAAGATTTTGCAACTTACTACTGTCAACAGAGTTACAGTACCCCTCGAACTTTTGGCCAGGGGACCAAGCTGGAGATCAAACG	KV1-39	KJ2	QQSYSTPRT	9	1.5674
c28930	149812	NN	ATGGACTGGACCTGGAGGATCCTCTTCTTGGTGGCAGCAGCCACAGGAGCCCACTCCCAGGTGCAGCTGGTGCAGTCTGGGGCTGAGGTGAAGAAGCCTGGGGCCTCAGTGAAGGTCTCCTGCAAGACTTCTGAATACACCTTCACCGACTACTATGTGCACTGGGTGCGACAGGCCCCTGGACAAGGGCTTGAGTGGATGGGATGGATCAACCCTAACAGTGGTGGCACAAACTATGCACAGAAGTTTCAGGGCAGGGTCACCATGACCAGGGACACGTCCATCACCACAGCCTACATGGAGTTGAGCAGGCTGACATCTGACGACACGGCCGTGTATTACTGTGTGAGAGAACTGCCGGGTATAGCAGTGGCTGGTACGAACTACTGGGGCCAGGGA…	IGHV1-2*02	IGHD6-19*01	IGHJ4*02	VRELPGIAVAGTNY	14	2.39521	ATGGACATGAGGGTCCCCGCTCAGCTCCTGGGGCTCCTGCTACTCTGGCTCCGAGGTGCCAGATGTGACATCCAGATGACCCAGTCTCCATCCTCCCTGTCTGCATCTGTAGGAGACAGAGTCACCATCACTTGCCGGACAAGTCAGAGCATTAGCAGGTATTTAAATTGGTATCAGCAAAAACCAGGGAAAGCCCCTAAGCTCCTGATCTATGCGGCATCCAGTTTGCAAAGTGGGGTCCCATCAAAGTTCAGTGGCAGTGGATCTGGGACAGATTTCACTCTCACCATCAGCAGTCTGCAACCTGAAGATTTTGCAACTTACTACTGTCAACAGAGTTACAGTACCCCTCGAACTTTTGGCCAGGGGACCAAGCTGGAGATCAAACG	KV1-39	KJ2	QQSYSTPRT	9	1.5674
c29038	149812	NN	ATGGACTGGACCTGGAGGATCCTCTTCTTGGTGGCAGCAGCCACAGGAGCCCACTCCCAGGTGCAGCTGGTGCAGTCTGGGGCTGAGGTGAAGAAGCCTGGGGCCTCAGTGAAGGTCTCCTGCAAGACTTCTGAATACACCTTCACCGACTACTATGTGCACTGGGTGCGACAGGCCCCTGGACAAGGGCTTGAGTGGATGGGATGGATCAACCCTAACAGTGGTGGCACAAACTATGCACAGAAGTTTCAGGGCAGGGTCACCATGACCAGGGACACGTCCATCACCACAGCCTACATGGAGTTGAGCAGGCTGACATCTGACGACACGGCCGTGTATTACTGTGTGAGAGAACTGCCGGGTATAGCAGTGGCTGGTACGAACTACTGGGGCCAGGGA…	IGHV1-2*02	IGHD6-19*01	IGHJ4*02	VRELPGIAVAGTNY	14	2.39521	ATGGACATGAGGGTCCCCGCTCAGCTCCTGGGGCTCCTGCTACTCTGGCTCCGAGGTGCCAGATGTGACATCCAGATGACCCAGTCTCCATCCTCCCTGTCTGCATCTGTAGGAGACAGAGTCACCATCACTTGCCGGACAAGTCAGAGCATTAGCAGGTATTTAAATTGGTATCAGCAAAAACCAGGGAAAGCCCCTAAGCTCCTGATCTATGCGGCATCCAGTTTGCAAAGTGGGGTCCCATCAAAGTTCAGTGGCAGTGGATCTGGGACAGATTTCACTCTCACCATCAGCAGTCTGCAACCTGAAGATTTTGCAACTTACTACTGTCAACAGAGTTACAGTACCCCTCGAACTTTTGGCCAGGGGACCAAGCTGGAGATCAAACG	KV1-39	KJ2	QQSYSTPRT	9	1.5674
c28946	149812	NN	ATGGACTGGACCTGGAGGATCCTCTTCTTGGTGGCAGCAGCCACAGGAGCCCACTCCCAGGTGCAGCTGGTGCAGTCTGGGGCTGAGGTGAAGAAGCCTGGGGCCTCAGTGAAGGTCTCCTGCAAGACTTCTGAATACACCTTCACCGACTACTATGTGCACTGGGTGCGACAGGCCCCTGGACAAGGGCTTGAGTGGATGGGATGGATCAACCCTAACAGTGGTGGCACAAACTATGCACAGAAGTTTCAGGGCAGGGTCACCATGACCAGGGACACGTCCATCACCACAGCCTACATGGAGTTGAGCAGGCTGACATCTGACGACACGGCCGTGTATTACTGTGTGAGAGAACTGCCGGGTATAGCAGTGGCTGGTACGAACTACTGGGGCCAGGGA…	IGHV1-2*02	IGHD6-19*01	IGHJ4*02	VRELPGIAVAGTNY	14	2.39521	ATGGACATGAGGGTCCCCGCTCAGCTCCTGGGGCTCCTGCTACTCTGGCTCCGAGGTGCCAGATGTGACATCCAGATGACCCAGTCTCCATCCTCCCTGTCTGCATCTGTAGGAGACAGAGTCACCATCACTTGCCGGACAAGTCAGAGCATTAGCAGGTATTTAAATTGGTATCAGCAAAAACCAGGGAAAGCCCCTAAGCTCCTGATCTATGCGGCATCCAGTTTGCAAAGTGGGGTCCCATCAAAGTTCAGTGGCAGTGGATCTGGGACAGATTTCACTCTCACCATCAGCAGTCTGCAACCTGAAGATTTTGCAACTTACTACTGTCAACAGAGTTACAGTACCCCTCGAACTTTTGGCCAGGGGACCAAGCTGGAGATCAAACG	KV1-39	KJ2	QQSYSTPRT	9	1.5674
c29122	149812	NN	ATGGACTGGACCTGGAGGATCCTCTTCTTGGTGGCAGCAGCCACAGGAGCCCACTCCCAGGTGCAGCTGGTGCAGTCTGGGGCTGAGGTGAAGAAGCCTGGGGCCTCAGTGAAGGTCTCCTGCAAGACTTCTGAATACACCTTCACCGACTACTATGTGCACTGGGTGCGACAGGCCCCTGGACAAGGGCTTGAGTGGATGGGATGGATCAACCCTAACAGTGGTGGCACAAACTATGCACAGAAGTTTCAGGGCAGGGTCACCATGACCAGGGACACGTCCATCACCACAGCCTACATGGAGTTGAGCAGGCTGACATCTGACGACACGGCCGTGTATTACTGTGTGAGAGAACTGCCGGGTATAGCAGTGGCTGGTACGAACTACTGGGGCCAGGGA…	IGHV1-2*02	IGHD6-19*01	IGHJ4*02	VRELPGIAVAGTNY	14	2.39521	ATGGACATGAGGGTCCCCGCTCAGCTCCTGGGGCTCCTGCTACTCTGGCTCCGAGGTGCCAGATGTGACATCCAGATGACCCAGTCTCCATCCTCCCTGTCTGCATCTGTAGGAGACAGAGTCACCATCACTTGCCGGACAAGTCAGAGCATTAGCAGGTATTTAAATTGGTATCAGCAAAAACCAGGGAAAGCCCCTAAGCTCCTGATCTATGCGGCATCCAGTTTGCAAAGTGGGGTCCCATCAAAGTTCAGTGGCAGTGGATCTGGGACAGATTTCACTCTCACCATCAGCAGTCTGCAACCTGAAGATTTTGCAACTTACTACTGTCAACAGAGTTACAGTACCCCTCGAACTTTTGGCCAGGGGACCAAGCTGGAGATCAAACG	KV1-39	KJ2	QQSYSTPRT	9	1.5674
c28824	149812	NN	ATGGACTGGACCTGGAGGATCCTCTTCTTGGTGGCAGCAGCCACAGGAGCCCACTCCCAGGTGCAGCTGGTGCAGTCTGGGGCTGAGGTGAAGAAGCCTGGGGCCTCAGTGAAGGTCTCCTGCAAGACTTCTGAATACACCTTCACCGACTACTATGTGCACTGGGTGCGACAGGCCCCTGGACAAGGGCTTGAGTGGATGGGATGGATCAACCCTAACAGTGGTGGCACAAACTATGCACAGAAGTTTCAGGGCAGGGTCACCATGACCAGGGACACGTCCATCACCACAGCCTACATGGAGTTGAGCAGGCTGACATCTGACGACACGGCCGTGTATTACTGTGTGAGAGAACTGCCGGGTATAGCAGTGGCTGGTACGAACTACTGGGGCCAGGGA…	IGHV1-2*02	IGHD6-19*01	IGHJ4*02	VRELPGIAVAGTNY	14	2.39521	ATGGACATGAGGGTCCCCGCTCAGCTCCTGGGGCTCCTGCTACTCTGGCTCCGAGGTGCCAGATGTGACATCCAGATGACCCAGTCTCCATCCTCCCTGTCTGCATCTGTAGGAGACAGAGTCACCATCACTTGCCGGACAAGTCAGAGCATTAGCAGGTATTTAAATTGGTATCAGCAAAAACCAGGGAAAGCCCCTAAGCTCCTGATCTATGCGGCATCCAGTTTGCAAAGTGGGGTCCCATCAAAGTTCAGTGGCAGTGGATCTGGGACAGATTTCACTCTCACCATCAGCAGTCTGCAACCTGAAGATTTTGCAACTTACTACTGTCAACAGAGTTACAGTACCCCTCGAACTTTTGGCCAGGGGACCAAGCTGGAGATCAAACG	KV1-39	KJ2	QQSYSTPRT	9	1.5674
c29144	149812	NN	ATGGACTGGACCTGGAGGATCCTCTTCTTGGTGGCAGCAGCCACAGGAGCCCACTCCCAGGTGCAGCTGGTGCAGTCTGGGGCTGAGGTGAAGAAGCCTGGGGCCTCAGTGAAGGTCTCCTGCAAGACTTCTGAATACACCTTCACCGACTACTATGTGCACTGGGTGCGACAGGCCCCTGGACAAGGGCTTGAGTGGATGGGATGGATCAACCCTAACAGTGGTGGCACAAACTATGCACAGAAGTTTCAGGGCAGGGTCACCATGACCAGGGACACGTCCATCACCACAGCCTACATGGAGTTGAGCAGGCTGACATCTGACGACACGGCCGTGTATTACTGTGTGAGAGAACTGCCGGGTATAGCAGTGGCTGGTACGAACTACTGGGGCCAGGGA…	IGHV1-2*02	IGHD6-19*01	IGHJ4*02	VRELPGIAVAGTNY	14	2.39521	ATGGACATGAGGGTCCCCGCTCAGCTCCTGGGGCTCCTGCTACTCTGGCTCCGAGGTGCCAGATGTGACATCCAGATGACCCAGTCTCCATCCTCCCTGTCTGCATCTGTAGGAGACAGAGTCACCATCACTTGCCGGACAAGTCAGAGCATTAGCAGGTATTTAAATTGGTATCAGCAAAAACCAGGGAAAGCCCCTAAGCTCCTGATCTATGCGGCATCCAGTTTGCAAAGTGGGGTCCCATCAAAGTTCAGTGGCAGTGGATCTGGGACAGATTTCACTCTCACCATCAGCAGTCTGCAACCTGAAGATTTTGCAACTTACTACTGTCAACAGAGTTACAGTACCCCTCGAACTTTTGGCCAGGGGACCAAGCTGGAGATCAAACG	KV1-39	KJ2	QQSYSTPRT	9	1.5674
c29001	149812	NN	ATGGACTGGACCTGGAGGATCCTCTTCTTGGTGGCAGCAGCCACAGGAGCCCACTCCCAGGTGCAGCTGGTGCAGTCTGGGGCTGAGGTGAAGAAGCCTGGGGCCTCAGTGAAGGTCTCCTGCAAGACTTCTGAATACACCTTCACCGACTACTATGTGCACTGGGTGCGACAGGCCCCTGGACAAGGGCTTGAGTGGATGGGATGGATCAACCCTAACAGTGGTGGCACAAACTATGCACAGAAGTTTCAGGGCAGGGTCACCATGACCAGGGACACGTCCATCACCACAGCCTACATGGAGTTGAGCAGGCTGACATCTGACGACACGGCCGTGTATTACTGTGTGAGAGAACTGCCGGGTATAGCAGTGGCTGGTACGAACTACTGGGGCCAGGGA…	IGHV1-2*02	IGHD6-19*01	IGHJ4*02	VRELPGIAVAGTNY	14	2.39521	ATGGACATGAGGGTCCCCGCTCAGCTCCTGGGGCTCCTGCTACTCTGGCTCCGAGGTGCCAGATGTGACATCCAGATGACCCAGTCTCCATCCTCCCTGTCTGCATCTGTAGGAGACAGAGTCACCATCACTTGCCGGACAAGTCAGAGCATTAGCAGGTATTTAAATTGGTATCAGCAAAAACCAGGGAAAGCCCCTAAGCTCCTGATCTATGCGGCATCCAGTTTGCAAAGTGGGGTCCCATCAAAGTTCAGTGGCAGTGGATCTGGGACAGATTTCACTCTCACCATCAGCAGTCTGCAACCTGAAGATTTTGCAACTTACTACTGTCAACAGAGTTACAGTACCCCTCGAACTTTTGGCCAGGGGACCAAGCTGGAGATCAAACG	KV1-39	KJ2	QQSYSTPRT	9	1.5674
c29137	149812	NN	ATGGACTGGACCTGGAGGATCCTCTTCTTGGTGGCAGCAGCCACAGGAGCCCACTCCCAGGTGCAGCTGGTGCAGTCTGGGGCTGAGGTGAAGAAGCCTGGGGCCTCAGTGAAGGTCTCCTGCAAGACTTCTGAATACACCTTCACCGACTACTATGTGCACTGGGTGCGACAGGCCCCTGGACAAGGGCTTGAGTGGATGGGATGGATCAACCCTAACAGTGGTGGCACAAACTATGCACAGAAGTTTCAGGGCAGGGTCACCATGACCAGGGACACGTCCATCACCACAGCCTACATGGAGTTGAGCAGGCTGACATCTGACGACACGGCCGTGTATTACTGTGTGAGAGAACTGCCGGGTATAGCAGTGGCTGGTACGAACTACTGGGGCCAGGGA…	IGHV1-2*02	IGHD6-19*01	IGHJ4*02	VRELPGIAVAGTNY	14	2.39521	ATGGACATGAGGGTCCCCGCTCAGCTCCTGGGGCTCCTGCTACTCTGGCTCCGAGGTGCCAGATGTGACATCCAGATGACCCAGTCTCCATCCTCCCTGTCTGCATCTGTAGGAGACAGAGTCACCATCACTTGCCGGACAAGTCAGAGCATTAGCAGGTATTTAAATTGGTATCAGCAAAAACCAGGGAAAGCCCCTAAGCTCCTGATCTATGCGGCATCCAGTTTGCAAAGTGGGGTCCCATCAAAGTTCAGTGGCAGTGGATCTGGGACAGATTTCACTCTCACCATCAGCAGTCTGCAACCTGAAGATTTTGCAACTTACTACTGTCAACAGAGTTACAGTACCCCTCGAACTTTTGGCCAGGGGACCAAGCTGGAGATCAAACG	KV1-39	KJ2	QQSYSTPRT	9	1.5674
c29062	149812	NN	ATGGACTGGACCTGGAGGATCCTCTTCTTGGTGGCAGCAGCCACAGGAGCCCACTCCCAGGTGCAGCTGGTGCAGTCTGGGGCTGAGGTGAAGAAGCCTGGGGCCTCAGTGAAGGTCTCCTGCAAGACTTCTGAATACACCTTCACCGACTACTATGTGCACTGGGTGCGACAGGCCCCTGGACAAGGGCTTGAGTGGATGGGATGGATCAACCCTAACAGTGGTGGCACAAACTATGCACAGAAGTTTCAGGGCAGGGTCACCATGACCAGGGACACGTCCATCACCACAGCCTACATGGAGTTGAGCAGGCTGACATCTGACGACACGGCCGTGTATTACTGTGTGAGAGAACTGCCGGGTATAGCAGTGGCTGGTACGAACTACTGGGGCCAGGGA…	IGHV1-2*02	IGHD6-19*01	IGHJ4*02	VRELPGIAVAGTNY	14	2.39521	ATGGACATGAGGGTCCCCGCTCAGCTCCTGGGGCTCCTGCTACTCTGGCTCCGAGGTGCCAGATGTGACATCCAGATGACCCAGTCTCCATCCTCCCTGTCTGCATCTGTAGGAGACAGAGTCACCATCACTTGCCGGACAAGTCAGAGCATTAGCAGGTATTTAAATTGGTATCAGCAAAAACCAGGGAAAGCCCCTAAGCTCCTGATCTATGCGGCATCCAGTTTGCAAAGTGGGGTCCCATCAAAGTTCAGTGGCAGTGGATCTGGGACAGATTTCACTCTCACCATCAGCAGTCTGCAACCTGAAGATTTTGCAACTTACTACTGTCAACAGAGTTACAGTACCCCTCGAACTTTTGGCCAGGGGACCAAGCTGGAGATCAAACG	KV1-39	KJ2	QQSYSTPRT	9	1.5674
c28917	149812	NN	ATGGACTGGACCTGGAGGATCCTCTTCTTGGTGGCAGCAGCCACAGGAGCCCACTCCCAGGTGCAGCTGGTGCAGTCTGGGGCTGAGGTGAAGAAGCCTGGGGCCTCAGTGAAGGTCTCCTGCAAGACTTCTGAATACACCTTCACCGACTACTATGTGCACTGGGTGCGACAGGCCCCTGGACAAGGGCTTGAGTGGATGGGATGGATCAACCCTAACAGTGGTGGCACAAACTATGCACAGAAGTTTCAGGGCAGGGTCACCATGACCAGGGACACGTCCATCACCACAGCCTACATGGAGTTGAGCAGGCTGACATCTGACGACACGGCCGTGTATTACTGTGTGAGAGAACTGCCGGGTATAGCAGTGGCTGGTACGAACTACTGGGGCCAGGGA…	IGHV1-2*02	IGHD6-19*01	IGHJ4*02	VRELPGIAVAGTNY	14	2.39521	ATGGACATGAGGGTCCCCGCTCAGCTCCTGGGGCTCCTGCTACTCTGGCTCCGAGGTGCCAGATGTGACATCCAGATGACCCAGTCTCCATCCTCCCTGTCTGCATCTGTAGGAGACAGAGTCACCATCACTTGCCGGACAAGTCAGAGCATTAGCAGGTATTTAAATTGGTATCAGCAAAAACCAGGGAAAGCCCCTAAGCTCCTGATCTATGCGGCATCCAGTTTGCAAAGTGGGGTCCCATCAAAGTTCAGTGGCAGTGGATCTGGGACAGATTTCACTCTCACCATCAGCAGTCTGCAACCTGAAGATTTTGCAACTTACTACTGTCAACAGAGTTACAGTACCCCTCGAACTTTTGGCCAGGGGACCAAGCTGGAGATCAAACG	KV1-39	KJ2	QQSYSTPRT	9	1.5674
c28852	149812	NN	ATGGACTGGACCTGGAGGATCCTCTTCTTGGTGGCAGCAGCCACAGGAGCCCACTCCCAGGTGCAGCTGGTGCAGTCTGGGGCTGAGGTGAAGAAGCCTGGGGCCTCAGTGAAGGTCTCCTGCAAGACTTCTGAATACACCTTCACCGACTACTATGTGCACTGGGTGCGACAGGCCCCTGGACAAGGGCTTGAGTGGATGGGATGGATCAACCCTAACAGTGGTGGCACAAACTATGCACAGAAGTTTCAGGGCAGGGTCACCATGACCAGGGACACGTCCATCACCACAGCCTACATGGAGTTGAGCAGGCTGACATCTGACGACACGGCCGTGTATTACTGTGTGAGAGAACTGCCGGGTATAGCAGTGGCTGGTACGAACTACTGGGGCCAGGGA…	IGHV1-2*02	IGHD6-19*01	IGHJ4*02	VRELPGIAVAGTNY	14	2.39521	ATGGACATGAGGGTCCCCGCTCAGCTCCTGGGGCTCCTGCTACTCTGGCTCCGAGGTGCCAGATGTGACATCCAGATGACCCAGTCTCCATCCTCCCTGTCTGCATCTGTAGGAGACAGAGTCACCATCACTTGCCGGACAAGTCAGAGCATTAGCAGGTATTTAAATTGGTATCAGCAAAAACCAGGGAAAGCCCCTAAGCTCCTGATCTATGCGGCATCCAGTTTGCAAAGTGGGGTCCCATCAAAGTTCAGTGGCAGTGGATCTGGGACAGATTTCACTCTCACCATCAGCAGTCTGCAACCTGAAGATTTTGCAACTTACTACTGTCAACAGAGTTACAGTACCCCTCGAACTTTTGGCCAGGGGACCAAGCTGGAGATCAAACG	KV1-39	KJ2	QQSYSTPRT	9	1.5674
c28736	149812	NN	ATGGACTGGACCTGGAGGATCCTCTTCTTGGTGGCAGCAGCCACAGGAGCCCACTCCCAGGTGCAGCTGGTGCAGTCTGGGGCTGAGGTGAAGAAGCCTGGGGCCTCAGTGAAGGTCTCCTGCAAGACTTCTGAATACACCTTCACCGACTACTATGTGCACTGGGTGCGACAGGCCCCTGGACAAGGGCTTGAGTGGATGGGATGGATCAACCCTAACAGTGGTGGCACAAACTATGCACAGAAGTTTCAGGGCAGGGTCACCATGACCAGGGACACGTCCATCACCACAGCCTACATGGAGTTGAGCAGGCTGACATCTGACGACACGGCCGTGTATTACTGTGTGAGAGAACTGCCGGGTATAGCAGTGGCTGGTACGAACTACTGGGGCCAGGGA…	IGHV1-2*02	IGHD6-19*01	IGHJ4*02	VRELPGIAVAGTNY	14	2.39521	ATGGACATGAGGGTCCCCGCTCAGCTCCTGGGGCTCCTGCTACTCTGGCTCCGAGGTGCCAGATGTGACATCCAGATGACCCAGTCTCCATCCTCCCTGTCTGCATCTGTAGGAGACAGAGTCACCATCACTTGCCGGACAAGTCAGAGCATTAGCAGGTATTTAAATTGGTATCAGCAAAAACCAGGGAAAGCCCCTAAGCTCCTGATCTATGCGGCATCCAGTTTGCAAAGTGGGGTCCCATCAAAGTTCAGTGGCAGTGGATCTGGGACAGATTTCACTCTCACCATCAGCAGTCTGCAACCTGAAGATTTTGCAACTTACTACTGTCAACAGAGTTACAGTACCCCTCGAACTTTTGGCCAGGGGACCAAGCTGGAGATCAAACG	KV1-39	KJ2	QQSYSTPRT	9	1.5674
c29061	149812	NN	ATGGACTGGACCTGGAGGATCCTCTTCTTGGTGGCAGCAGCCACAGGAGCCCACTCCCAGGTGCAGCTGGTGCAGTCTGGGGCTGAGGTGAAGAAGCCTGGGGCCTCAGTGAAGGTCTCCTGCAAGACTTCTGAATACACCTTCACCGACTACTATGTGCACTGGGTGCGACAGGCCCCTGGACAAGGGCTTGAGTGGATGGGATGGATCAACCCTAACAGTGGTGGCACAAACTATGCACAGAAGTTTCAGGGCAGGGTCACCATGACCAGGGACACGTCCATCACCACAGCCTACATGGAGTTGAGCAGGCTGACATCTGACGACACGGCCGTGTATTACTGTGTGAGAGAACTGCCGGGTATAGCAGTGGCTGGTACGAACTACTGGGGCCAGGGA…	IGHV1-2*02	IGHD6-19*01	IGHJ4*02	VRELPGIAVAGTNY	14	2.39521	ATGGACATGAGGGTCCCCGCTCAGCTCCTGGGGCTCCTGCTACTCTGGCTCCGAGGTGCCAGATGTGACATCCAGATGACCCAGTCTCCATCCTCCCTGTCTGCATCTGTAGGAGACAGAGTCACCATCACTTGCCGGACAAGTCAGAGCATTAGCAGGTATTTAAATTGGTATCAGCAAAAACCAGGGAAAGCCCCTAAGCTCCTGATCTATGCGGCATCCAGTTTGCAAAGTGGGGTCCCATCAAAGTTCAGTGGCAGTGGATCTGGGACAGATTTCACTCTCACCATCAGCAGTCTGCAACCTGAAGATTTTGCAACTTACTACTGTCAACAGAGTTACAGTACCCCTCGAACTTTTGGCCAGGGGACCAAGCTGGAGATCAAACG	KV1-39	KJ2	QQSYSTPRT	9	1.5674
c29240	149812	NN	ATGGACTGGACCTGGAGGATCCTCTTCTTGGTGGCAGCAGCCACAGGAGCCCACTCCCAGGTGCAGCTGGTGCAGTCTGGGGCTGAGGTGAAGAAGCCTGGGGCCTCAGTGAAGGTCTCCTGCAAGACTTCTGAATACACCTTCACCGACTACTATGTGCACTGGGTGCGACAGGCCCCTGGACAAGGGCTTGAGTGGATGGGATGGATCAACCCTAACAGTGGTGGCACAAACTATGCACAGAAGTTTCAGGGCAGGGTCACCATGACCAGGGACACGTCCATCACCACAGCCTACATGGAGTTGAGCAGGCTGACATCTGACGACACGGCCGTGTATTACTGTGTGAGAGAACTGCCGGGTATAGCAGTGGCTGGTACGAACTACTGGGGCCAGGGA…	IGHV1-2*02	IGHD6-19*01	IGHJ4*02	VRELPGIAVAGTNY	14	2.39521	ATGGACATGAGGGTCCCCGCTCAGCTCCTGGGGCTCCTGCTACTCTGGCTCCGAGGTGCCAGATGTGACATCCAGATGACCCAGTCTCCATCCTCCCTGTCTGCATCTGTAGGAGACAGAGTCACCATCACTTGCCGGACAAGTCAGAGCATTAGCAGGTATTTAAATTGGTATCAGCAAAAACCAGGGAAAGCCCCTAAGCTCCTGATCTATGCGGCATCCAGTTTGCAAAGTGGGGTCCCATCAAAGTTCAGTGGCAGTGGATCTGGGACAGATTTCACTCTCACCATCAGCAGTCTGCAACCTGAAGATTTTGCAACTTACTACTGTCAACAGAGTTACAGTACCCCTCGAACTTTTGGCCAGGGGACCAAGCTGGAGATCAAACG	KV1-39	KJ2	QQSYSTPRT	9	1.5674
c28977	149812	NN	ATGGACTGGACCTGGAGGATCCTCTTCTTGGTGGCAGCAGCCACAGGAGCCCACTCCCAGGTGCAGCTGGTGCAGTCTGGGGCTGAGGTGAAGAAGCCTGGGGCCTCAGTGAAGGTCTCCTGCAAGACTTCTGAATACACCTTCACCGACTACTATGTGCACTGGGTGCGACAGGCCCCTGGACAAGGGCTTGAGTGGATGGGATGGATCAACCCTAACAGTGGTGGCACAAACTATGCACAGAAGTTTCAGGGCAGGGTCACCATGACCAGGGACACGTCCATCACCACAGCCTACATGGAGTTGAGCAGGCTGACATCTGACGACACGGCCGTGTATTACTGTGTGAGAGAACTGCCGGGTATAGCAGTGGCTGGTACGAACTACTGGGGCCAGGGA…	IGHV1-2*02	IGHD6-19*01	IGHJ4*02	VRELPGIAVAGTNY	14	2.39521	ATGGACATGAGGGTCCCCGCTCAGCTCCTGGGGCTCCTGCTACTCTGGCTCCGAGGTGCCAGATGTGACATCCAGATGACCCAGTCTCCATCCTCCCTGTCTGCATCTGTAGGAGACAGAGTCACCATCACTTGCCGGACAAGTCAGAGCATTAGCAGGTATTTAAATTGGTATCAGCAAAAACCAGGGAAAGCCCCTAAGCTCCTGATCTATGCGGCATCCAGTTTGCAAAGTGGGGTCCCATCAAAGTTCAGTGGCAGTGGATCTGGGACAGATTTCACTCTCACCATCAGCAGTCTGCAACCTGAAGATTTTGCAACTTACTACTGTCAACAGAGTTACAGTACCCCTCGAACTTTTGGCCAGGGGACCAAGCTGGAGATCAAACG	KV1-39	KJ2	QQSYSTPRT	9	1.5674
c29016	149812	NN	ATGGACTGGACCTGGAGGATCCTCTTCTTGGTGGCAGCAGCCACAGGAGCCCACTCCCAGGTGCAGCTGGTGCAGTCTGGGGCTGAGGTGAAGAAGCCTGGGGCCTCAGTGAAGGTCTCCTGCAAGACTTCTGAATACACCTTCACCGACTACTATGTGCACTGGGTGCGACAGGCCCCTGGACAAGGGCTTGAGTGGATGGGATGGATCAACCCTAACAGTGGTGGCACAAACTATGCACAGAAGTTTCAGGGCAGGGTCACCATGACCAGGGACACGTCCATCACCACAGCCTACATGGAGTTGAGCAGGCTGACATCTGACGACACGGCCGTGTATTACTGTGTGAGAGAACTGCCGGGTATAGCAGTGGCTGGTACGAACTACTGGGGCCAGGGA…	IGHV1-2*02	IGHD6-19*01	IGHJ4*02	VRELPGIAVAGTNY	14	2.39521	ATGGACATGAGGGTCCCCGCTCAGCTCCTGGGGCTCCTGCTACTCTGGCTCCGAGGTGCCAGATGTGACATCCAGATGACCCAGTCTCCATCCTCCCTGTCTGCATCTGTAGGAGACAGAGTCACCATCACTTGCCGGACAAGTCAGAGCATTAGCAGGTATTTAAATTGGTATCAGCAAAAACCAGGGAAAGCCCCTAAGCTCCTGATCTATGCGGCATCCAGTTTGCAAAGTGGGGTCCCATCAAAGTTCAGTGGCAGTGGATCTGGGACAGATTTCACTCTCACCATCAGCAGTCTGCAACCTGAAGATTTTGCAACTTACTACTGTCAACAGAGTTACAGTACCCCTCGAACTTTTGGCCAGGGGACCAAGCTGGAGATCAAACG	KV1-39	KJ2	QQSYSTPRT	9	1.5674
c28855	149812	NN	ATGGACTGGACCTGGAGGATCCTCTTCTTGGTGGCAGCAGCCACAGGAGCCCACTCCCAGGTGCAGCTGGTGCAGTCTGGGGCTGAGGTGAAGAAGCCTGGGGCCTCAGTGAAGGTCTCCTGCAAGACTTCTGAATACACCTTCACCGACTACTATGTGCACTGGGTGCGACAGGCCCCTGGACAAGGGCTTGAGTGGATGGGATGGATCAACCCTAACAGTGGTGGCACAAACTATGCACAGAAGTTTCAGGGCAGGGTCACCATGACCAGGGACACGTCCATCACCACAGCCTACATGGAGTTGAGCAGGCTGACATCTGACGACACGGCCGTGTATTACTGTGTGAGAGAACTGCCGGGTATAGCAGTGGCTGGTACGAACTACTGGGGCCAGGGA…	IGHV1-2*02	IGHD6-19*01	IGHJ4*02	VRELPGIAVAGTNY	14	2.39521	ATGGACATGAGGGTCCCCGCTCAGCTCCTGGGGCTCCTGCTACTCTGGCTCCGAGGTGCCAGATGTGACATCCAGATGACCCAGTCTCCATCCTCCCTGTCTGCATCTGTAGGAGACAGAGTCACCATCACTTGCCGGACAAGTCAGAGCATTAGCAGGTATTTAAATTGGTATCAGCAAAAACCAGGGAAAGCCCCTAAGCTCCTGATCTATGCGGCATCCAGTTTGCAAAGTGGGGTCCCATCAAAGTTCAGTGGCAGTGGATCTGGGACAGATTTCACTCTCACCATCAGCAGTCTGCAACCTGAAGATTTTGCAACTTACTACTGTCAACAGAGTTACAGTACCCCTCGAACTTTTGGCCAGGGGACCAAGCTGGAGATCAAACG	KV1-39	KJ2	QQSYSTPRT	9	1.5674
c28857	149812	NN	ATGGACTGGACCTGGAGGATCCTCTTCTTGGTGGCAGCAGCCACAGGAGCCCACTCCCAGGTGCAGCTGGTGCAGTCTGGGGCTGAGGTGAAGAAGCCTGGGGCCTCAGTGAAGGTCTCCTGCAAGACTTCTGAATACACCTTCACCGACTACTATGTGCACTGGGTGCGACAGGCCCCTGGACAAGGGCTTGAGTGGATGGGATGGATCAACCCTAACAGTGGTGGCACAAACTATGCACAGAAGTTTCAGGGCAGGGTCACCATGACCAGGGACACGTCCATCACCACAGCCTACATGGAGTTGAGCAGGCTGACATCTGACGACACGGCCGTGTATTACTGTGTGAGAGAACTGCCGGGTATAGCAGTGGCTGGTACGAACTACTGGGGCCAGGGA…	IGHV1-2*02	IGHD6-19*01	IGHJ4*02	VRELPGIAVAGTNY	14	2.39521	ATGGACATGAGGGTCCCCGCTCAGCTCCTGGGGCTCCTGCTACTCTGGCTCCGAGGTGCCAGATGTGACATCCAGATGACCCAGTCTCCATCCTCCCTGTCTGCATCTGTAGGAGACAGAGTCACCATCACTTGCCGGACAAGTCAGAGCATTAGCAGGTATTTAAATTGGTATCAGCAAAAACCAGGGAAAGCCCCTAAGCTCCTGATCTATGCGGCATCCAGTTTGCAAAGTGGGGTCCCATCAAAGTTCAGTGGCAGTGGATCTGGGACAGATTTCACTCTCACCATCAGCAGTCTGCAACCTGAAGATTTTGCAACTTACTACTGTCAACAGAGTTACAGTACCCCTCGAACTTTTGGCCAGGGGACCAAGCTGGAGATCAAACG	KV1-39	KJ2	QQSYSTPRT	9	1.5674
c29243	149812	NN	ATGGACTGGACCTGGAGGATCCTCTTCTTGGTGGCAGCAGCCACAGGAGCCCACTCCCAGGTGCAGCTGGTGCAGTCTGGGGCTGAGGTGAAGAAGCCTGGGGCCTCAGTGAAGGTCTCCTGCAAGACTTCTGAATACACCTTCACCGACTACTATGTGCACTGGGTGCGACAGGCCCCTGGACAAGGGCTTGAGTGGATGGGATGGATCAACCCTAACAGTGGTGGCACAAACTATGCACAGAAGTTTCAGGGCAGGGTCACCATGACCAGGGACACGTCCATCACCACAGCCTACATGGAGTTGAGCAGGCTGACATCTGACGACACGGCCGTGTATTACTGTGTGAGAGAACTGCCGGGTATAGCAGTGGCTGGTACGAACTACTGGGGCCAGGGA…	IGHV1-2*02	IGHD6-19*01	IGHJ4*02	VRELPGIAVAGTNY	14	2.39521	ATGGACATGAGGGTCCCCGCTCAGCTCCTGGGGCTCCTGCTACTCTGGCTCCGAGGTGCCAGATGTGACATCCAGATGACCCAGTCTCCATCCTCCCTGTCTGCATCTGTAGGAGACAGAGTCACCATCACTTGCCGGACAAGTCAGAGCATTAGCAGGTATTTAAATTGGTATCAGCAAAAACCAGGGAAAGCCCCTAAGCTCCTGATCTATGCGGCATCCAGTTTGCAAAGTGGGGTCCCATCAAAGTTCAGTGGCAGTGGATCTGGGACAGATTTCACTCTCACCATCAGCAGTCTGCAACCTGAAGATTTTGCAACTTACTACTGTCAACAGAGTTACAGTACCCCTCGAACTTTTGGCCAGGGGACCAAGCTGGAGATCAAACG	KV1-39	KJ2	QQSYSTPRT	9	1.5674
c29209	149812	NN	ATGGACTGGACCTGGAGGATCCTCTTCTTGGTGGCAGCAGCCACAGGAGCCCACTCCCAGGTACACCTGGTGCAGTCTGGGGCTGAGGTGAAGAAGCCAGGGGCCTCAGTGAAGGTCTCCTGTAAGGCTTCTGGATACACCTTCATCGACTACCATCTGCACTGGGTGCGACAGGCCCCTGGACAAGGGCCTGAGTGGATAGGACGGATCAACCCTAACAGTGGTGGCACAAACTACGCACAGAAGTTTCAGGACAGGGTCACCATGACCAGGGACACGTCCATCAACACTGCCTACATGGAGTTGAGCAGGCTAAGATCTGACGACACGGCCGTATATTACTGTGCGAGAGATTATTGGGGGCGAACTGGTTGGTTATTTGACCCCTGGGGCCAGGGA…	IGHV1-2*06	IGHD3-22*01	IGHJ5*02	ARDYWGRTGWLFDP	14	5.07463	ATGGCCTGGGCTCTGCTCCTCCTCACCCTCCTCACTCAGGGCACAGGATCCTGGGCTCAGTCTGCCCTGACTCAGCCTCCCTCCGTGTCCGGGTCTCCTGGACAATCAGTCACCATCTCCTGCACTGGAACCAGCAGTGACATTGGTGATTCTGACCGTGTCTCCTGGTACCAACAGCCCCCAGGCACAGCCCCCAAATTCCTGATTTATGAGGTCAGTAATCGGCCCTCAGGGGTCCCTGATCGCTTCTCTGGGTCCAAGTCTGGCAACACGGCCTCCCTAACCATCTCTGGGCTCCAGGCTGAGGACGAGGCTGATTATTACTGCAGCTCATTTACAAGCAGCGGCACTTTCGCTGTGATTTTTGGCGGAGGGACCAGGCTGACCGTCCTGAG	LV2-18	LJ2	SSFTSSGTFAVI	12	4.04984
c29072	149812	NN	ATGGACTGGACCTGGAGGATCCTCTTCTTGGTGGCAGCAGCCACAGGAGCCCACTCCCAGGTACACCTGGTGCAGTCTGGGGCTGAGGTGAAGAAGCCAGGGGCCTCAGTGAAGGTCTCCTGTAAGGCTTCTGGATACACCTTCATCGACTACCATCTGCACTGGGTGCGACAGGCCCCTGGACAAGGGCCTGAGTGGATAGGACGGATCAACCCTAACAGTGGTGGCACAAACTACGCACAGAAGTTTCAGGACAGGGTCACCATGACCAGGGACACGTCCATCAACACTGCCTACATGGAGTTGAGCAGGCTAAGATCTGACGACACGGCCGTATATTACTGTGCGAGAGATTATTGGGGGCGAACTGGTTGGTTATTTGACCCCTGGGGCCAGGGA…	IGHV1-2*06	IGHD3-22*01	IGHJ5*02	ARDYWGRTGWLFDP	14	5.07463	ATGGCCTGGGCTCTGCTCCTCCTCACCCTCCTCACTCAGGGCACAGGATCCTGGGCTCAGTCTGCCCTGACTCAGCCTCCCTCCGTGTCCGGGTCTCCTGGACAATCAGTCACCATCTCCTGCACTGGAACCAGCAGTGACATTGGTGATTCTGACCGTGTCTCCTGGTACCAACAGCCCCCAGGCACAGCCCCCAAATTCCTGATTTATGAGGTCAGTAATCGGCCCTCAGGGGTCCCTGATCGCTTCTCTGGGTCCAAGTCTGGCAACACGGCCTCCCTAACCATCTCTGGGCTCCAGGCTGAGGACGAGGCTGATTATTACTGCAGCTCATTTACAAGCAGCGGCACTTTCGCTGTGATTTTTGGCGGAGGGACCAGGCTGACCGTCCTGAG	LV2-18	LJ2	SSFTSSGTFAVI	12	4.04984
c28944	149812	NN	ATGGACTGGACCTGGAGGATCCTCTTCTTGGTGGCAGCAGCCACAGGAGCCCACTCCCAGGTACACCTGGTGCAGTCTGGGGCTGAGGTGAAGAAGCCAGGGGCCTCAGTGAAGGTCTCCTGTAAGGCTTCTGGATACACCTTCATCGACTACCATCTGCACTGGGTGCGACAGGCCCCTGGACAAGGGCCTGAGTGGATAGGACGGATCAACCCTAACAGTGGTGGCACAAACTACGCACAGAAGTTTCAGGACAGGGTCACCATGACCAGGGACACGTCCATCAACACTGCCTACATGGAGTTGAGCAGGCTAAGATCTGACGACACGGCCGTATATTACTGTGCGAGAGATTATTGGGGGCGAACTGGTTGGTTATTTGACCCCTGGGGCCAGGGA…	IGHV1-2*06	IGHD3-22*01	IGHJ5*02	ARDYWGRTGWLFDP	14	5.07463	ATGGCCTGGGCTCTGCTCCTCCTCACCCTCCTCACTCAGGGCACAGGATCCTGGGCTCAGTCTGCCCTGACTCAGCCTCCCTCCGTGTCCGGGTCTCCTGGACAATCAGTCACCATCTCCTGCACTGGAACCAGCAGTGACATTGGTGATTCTGACCGTGTCTCCTGGTACCAACAGCCCCCAGGCACAGCCCCCAAATTCCTGATTTATGAGGTCAGTAATCGGCCCTCAGGGGTCCCTGATCGCTTCTCTGGGTCCAAGTCTGGCAACACGGCCTCCCTAACCATCTCTGGGCTCCAGGCTGAGGACGAGGCTGATTATTACTGCAGCTCATTTACAAGCAGCGGCACTTTCGCTGTGATTTTTGGCGGAGGGACCAGGCTGACCGTCCTGAG	LV2-18	LJ2	SSFTSSGTFAVI	12	4.04984
c29138	149812	NN	ATGGACTGGACCTGGAGGATCCTCTTCTTGGTGGCAGCAGCAACACGTGCCCACTCCCAGGTGCAACTGGTGCAATCTGGGTCTGAGTGGAAGAAGCCTGGGACCTCAGTGAAGGTTTCCTGCAAGGCTTCTGGATACACCTTCACCAGCTATGCTATAAATTGGGTGCGACAGGCCCCTGGACAAGGGCTTGAGTGGATGGGATGGATCAACACCAACACTGGCAACCCAACGTATGCCCAGGGCTTCACAGGACGGTTTGTCTTCTCCTTGGGCACCTCTGTCAGTACGGCATATCTGCAGATCAGCAGCCTAAAGGCTGCGGACACTGCCGTGTATTACTGTGCGAGGGACCCCGGTGATGGCTACAATCTCGACCTCTGGGGCCAGGGAAGCCTG…	IGHV7-4-1*02	IGHD5-24*01	IGHJ5*02	ARDPGDGYNLDL	12	3.56083	ATGGCCTGGGCTCTGCTGCTCCTCACCCTCCTCACTCAGGGCACAGGGTCCTGGGCCCAGTCTGCCCTGACTCAGCCTGCCTCCGTGTCTGGGTCTCCTGGACAGTCGATCACCATCTCCTGCACTGGAACCAGCAGTGACGTTGGTGCTTATGACTATGTCTCCTGGTACCAACAGCACCCAGGCAAAGCCCCCAAACTCATCATTTATAAGGTCAGTGATCGGCCCTCAGGGGTTTCTAATCGCTTCTCTGGCTCCAAGTCTGGCAACACGGCCTCCCTGACCATCTCTGGGCTCCAGGCTGAGGACGAGGCTCATTATTACTGCAGCTCATATACAAGAAGTACTTTTCCTGTGTTCGGCGGAGGGACCAAGCTGTCCGTCCTAGG	LV2-14	LJ3	SSYTRSTFPV	10	2.5
c28931	149812	NN	ATGGACTGGACCTGGAGGATCCTCTTCTTGGTGGCAGCAGCAACACGTGCCCACTCCCAGGTGCAACTGGTGCAATCTGGGTCTGAGTGGAAGAAGCCTGGGACCTCAGTGAAGGTTTCCTGCAAGGCTTCTGGATACACCTTCACCAGCTATGCTATAAATTGGGTGCGACAGGCCCCTGGACAAGGGCTTGAGTGGATGGGATGGATCAACACCAACACTGGCAACCCAACGTATGCCCAGGGCTTCACAGGACGGTTTGTCTTCTCCTTGGGCACCTCTGTCAGTACGGCATATCTGCAGATCAGCAGCCTAAAGGCTGCGGACACTGCCGTGTATTACTGTGCGAGGGACCCCGGTGATGGCTACAATCTCGACCTCTGGGGCCAGGGAAGCCTG…	IGHV7-4-1*02	IGHD5-24*01	IGHJ5*02	ARDPGDGYNLDL	12	3.56083	ATGGCCTGGGCTCTGCTGCTCCTCACCCTCCTCACTCAGGGCACAGGGTCCTGGGCCCAGTCTGCCCTGACTCAGCCTGCCTCCGTGTCTGGGTCTCCTGGACAGTCGATCACCATCTCCTGCACTGGAACCAGCAGTGACGTTGGTGCTTATGACTATGTCTCCTGGTACCAACAGCACCCAGGCAAAGCCCCCAAACTCATCATTTATAAGGTCAGTGATCGGCCCTCAGGGGTTTCTAATCGCTTCTCTGGCTCCAAGTCTGGCAACACGGCCTCCCTGACCATCTCTGGGCTCCAGGCTGAGGACGAGGCTCATTATTACTGCAGCTCATATACAAGAAGTACTTTTCCTGTGTTCGGCGGAGGGACCAAGCTGTCCGTCCTAGG	LV2-14	LJ3	SSYTRSTFPV	10	2.5
c29195	149812	NN	ATGGACTGGACCTGGAGGATCCTCTTCTTGGTGGCAGCAGCAACACGTGCCCACTCCCAGGTGCAACTGGTGCAATCTGGGTCTGAGTGGAAGAAGCCTGGGACCTCAGTGAAGGTTTCCTGCAAGGCTTCTGGATACACCTTCACCAGCTATGCTATAAATTGGGTGCGACAGGCCCCTGGACAAGGGCTTGAGTGGATGGGATGGATCAACACCAACACTGGCAACCCAACGTATGCCCAGGGCTTCACAGGACGGTTTGTCTTCTCCTTGGGCACCTCTGTCAGTACGGCATATCTGCAGATCAGCAGCCTAAAGGCTGCGGACACTGCCGTGTATTACTGTGCGAGGGACCCCGGTGATGGCTACAATCTCGACCTCTGGGGCCAGGGAAGCCTG…	IGHV7-4-1*02	IGHD5-24*01	IGHJ5*02	ARDPGDGYNLDL	12	3.56083	ATGGCCTGGGCTCTGCTGCTCCTCACCCTCCTCACTCAGGGCACAGGGTCCTGGGCCCAGTCTGCCCTGACTCAGCCTGCCTCCGTGTCTGGGTCTCCTGGACAGTCGATCACCATCTCCTGCACTGGAACCAGCAGTGACGTTGGTGCTTATGACTATGTCTCCTGGTACCAACAGCACCCAGGCAAAGCCCCCAAACTCATCATTTATAAGGTCAGTGATCGGCCCTCAGGGGTTTCTAATCGCTTCTCTGGCTCCAAGTCTGGCAACACGGCCTCCCTGACCATCTCTGGGCTCCAGGCTGAGGACGAGGCTCATTATTACTGCAGCTCATATACAAGAAGTACTTTTCCTGTGTTCGGCGGAGGGACCAAGCTGTCCGTCCTAGG	LV2-14	LJ3	SSYTRSTFPV	10	2.5
c28711	149812	NN	ATGGACTGGACCTGGAGGATCCTCTTCTTGGTGGCAGCAGCAACACGTGCCCACTCCCAGGTGCAACTGGTGCAATCTGGGTCTGAGTGGAAGAAGCCTGGGACCTCAGTGAAGGTTTCCTGCAAGGCTTCTGGATACACCTTCACCAGCTATGCTATAAATTGGGTGCGACAGGCCCCTGGACAAGGGCTTGAGTGGATGGGATGGATCAACACCAACACTGGCAACCCAACGTATGCCCAGGGCTTCACAGGACGGTTTGTCTTCTCCTTGGGCACCTCTGTCAGTACGGCATATCTGCAGATCAGCAGCCTAAAGGCTGCGGACACTGCCGTGTATTACTGTGCGAGGGACCCCGGTGATGGCTACAATCTCGACCTCTGGGGCCAGGGAAGCCTG…	IGHV7-4-1*02	IGHD5-24*01	IGHJ5*02	ARDPGDGYNLDL	12	3.56083	ATGGCCTGGGCTCTGCTGCTCCTCACCCTCCTCACTCAGGGCACAGGGTCCTGGGCCCAGTCTGCCCTGACTCAGCCTGCCTCCGTGTCTGGGTCTCCTGGACAGTCGATCACCATCTCCTGCACTGGAACCAGCAGTGACGTTGGTGCTTATGACTATGTCTCCTGGTACCAACAGCACCCAGGCAAAGCCCCCAAACTCATCATTTATAAGGTCAGTGATCGGCCCTCAGGGGTTTCTAATCGCTTCTCTGGCTCCAAGTCTGGCAACACGGCCTCCCTGACCATCTCTGGGCTCCAGGCTGAGGACGAGGCTCATTATTACTGCAGCTCATATACAAGAAGTACTTTTCCTGTGTTCGGCGGAGGGACCAAGCTGTCCGTCCTAGG	LV2-14	LJ3	SSYTRSTFPV	10	2.5
c28927	149812	NN	ATGGACTGGACCTGGAGGATCCTCTTCTTGGTGGCAGCAGCCACAGGAGCCCACTCCCAGGTGCAGCTGGTGCAGTCTGGGGCTGAGGTGAAGAAGCCTGGGGCCTCAGTGAAGGTCTCCTGCAAGGCTTCTGGATACACCTTCACCGGCTACTATATGCACTGGGTGCGACAGGCCCCTGGACAAGGGCTTGAGTGGATGGGATGGATCAACCCTAACAGTGGTGGCACAAACTATGCACAGAAGTTTCAGGGCAGGGTCACCATGACCAGGGACACGTCCATCAGCACAGCCTACATGGAGCTGAGCAGGCTGAGATCTGACGACACGGCCGTGTATTACTGTGCGAGAGATCCTTTGGCAGCTCGCCGGAGGTGGTTCGACCCCTGGGGCCAGGGA…	IGHV1-2*02	IGHD6-6*01	IGHJ5*02	ARDPLAARRRWFDP	14	0	ATGGAAGCCCCAGCTCAGCTTCTCTTCCTCCTGCTACTCTGGCTCCCAGATACCACCGGAGAAATTGTGTTGACACAGTCTCCAGCCACCCTGTCTTTGTCTCCAGGGGAAAGAGCCACCCTCTCCTGCAGGGCCAGTCAGAGTGTTAGCAGCTACTTAGCCTGGTACCAACAGAAACCTGGCCAGGCTCCCAGGCTCCTCATCTATGATGCATCCAACAGGGCCACTGGCATCCCAGCCAGGTTCAGTGGCAGTGGGTCTGGGACAGACTTCACTCTCACCATCAGCAGCCTAGAGCCTGAAGATTTTGCAGTTTATTACTGTCAGCAGCGTAGCAACTGGCCTCCGATCACCTTCGGCCAAGGGACACGACTGGAGATTAAACG	KV3-11	KJ5	QQRSNWPPIT	10	0
c28778	149812	NN	ATGGATCTCATGTGCAAGAAAATGAAGCACCTGTGGTTCTTCCTCCTGCTGGTGGCGGCTCCCAGATGGGTCCTGTCCCAGCTGCAGCTGCAGGAGTCGGGCCCAGGACTGGTGAAGCCTTCGGAGACCCTGTCCCTCACCTGCACTGTCTCTGGTGGCTCCATCACCAGTAGTAGTTTCTACTGGGGCTGGATCCGCCAGCCCCCAGGGAAGGGGCTGGAGTGGATTGGGAGTATCTATTATAGTGGGAGCACCTATTACAACCCGTCCCTCAAGAGTCGAGTCACCATCTCCGTAGACACGTCCAAGAACCAGTTCTCCCTGAAGCTGACCTCTGTGACCGCCGCAGACACGGCTGTGTGTTATTGTGTGAGACAAAGAAATGCGTATTACTATGAT…	IGHV4-39*01	IGHD3-22*01	IGHJ3*02	VRQRNAYYYDSSGYYDAFDM	20	2.58621	ATGGACATGAGGGTCCCCGCTCAGCTCCTGGGGCTCCTGCTACTCTGGCTCCGAGGTGCCAGATGTGACATCCAGATGACCCAGTCTCCATCCTCCCTGTCTGCGTCTGTAGGAGACAGAGTCATCATCACTTGCCGGCCAAGTCAGAGCATTAGCAGCGATTTAAATTGGTATCAGCACAAACCAGGGAAAGCCCCTAAGCTCCTGATCTATACTGCATCCAGTTTGCAAAGTGGGGTCCCATCAAGGTTCAGTGGCAGTGGATCTGGGACAGATTTCACTCTCACCATCAGCAGCCTACAACCTGAAGATTTTGGAACCTACTACTGTCAACAGAGCTACAGCACCCCTCCGACTTTTGGCCAGGGGACCAAGCTGGAGATCAAACG	KV1-39	KJ2	QQSYSTPPT	9	3.75
c28687	149812	NN	ATGGATCTCATGTGCAAGAAAATGAAGCACCTGTGGTTCTTCCTCCTGCTGGTGGCGGCTCCCAGATGGGTCCTGTCCCAGCTGCAGCTGCAGGAGTCGGGCCCAGGACTGGTGAAGCCTTCGGAGACCCTGTCCCTCACCTGCACTGTCTCTGGTGGCTCCATCACCAGTAGTAGTTTCTACTGGGGCTGGATCCGCCAGCCCCCAGGGAAGGGGCTGGAGTGGATTGGGAGTATCTATTATAGTGGGAGCACCTATTACAACCCGTCCCTCAAGAGTCGAGTCACCATCTCCGTAGACACGTCCAAGAACCAGTTCTCCCTGAAGCTGACCTCTGTGACCGCCGCAGACACGGCTGTGTGTTATTGTGTGAGACAAAGAAATGCGTATTACTATGAT…	IGHV4-39*01	IGHD3-22*01	IGHJ3*02	VRQRNAYYYDSSGYYDAFDM	20	2.58621	ATGGACATGAGGGTCCCCGCTCAGCTCCTGGGGCTCCTGCTACTCTGGCTCCGAGGTGCCAGATGTGACATCCAGATGACCCAGTCTCCATCCTCCCTGTCTGCGTCTGTAGGAGACAGAGTCATCATCACTTGCCGGCCAAGTCAGAGCATTAGCAGCGATTTAAATTGGTATCAGCACAAACCAGGGAAAGCCCCTAAGCTCCTGATCTATACTGCATCCAGTTTGCAAAGTGGGGTCCCATCAAGGTTCAGTGGCAGTGGATCTGGGACAGATTTCACTCTCACCATCAGCAGCCTACAACCTGAAGATTTTGGAACCTACTACTGTCAACAGAGCTACAGCACCCCTCCGACTTTTGGCCAGGGGACCAAGCTGGAGATCAAACG	KV1-39	KJ2	QQSYSTPPT	9	3.75
c29203	149812	NN	ATGGACTGGACCTGGAGGTTCCTCTTTGTGGTGGCAGCAGCCACAGGTGTCCAGTTCCAGGTCCAGCTGGTGCAGTCTGGGGCTGAGGTGAAGAAGCCTGGGTCCTCGGTGAAGGTCTCCTGCAAGACTTCTGGAGGCTCCTTCACCAGCTCTGCTATCAGCTGGGTGCGACAGGCCCCTGGACAGGGGCTTGAGTGGATGGGAAGGTTCATCCCTATCCTTGATGTAGCACACTACGCACAGCAGTTCCAGGGCAGAGTCACGATTACCGCGGACAAATCCACGACCACAGTCTACATGGAGCTGAGCAGCCTGAGATCTGAGGACACGGCCGTATATTACTGTGCGAGAGCCCCCTCTATGGCCTTCATTACTATGATAGATGGGGCAGTTTCGGAT…	IGHV1-69*04	IGHD3-22*01	IGHJ5*02	ARAPSMAFITMIDGAVSDNWFDP	23	4.08163	ATGGCCTGGGCTCTGCTATTCCTCACCCTCCTCACTCAGGGCACAGGGTCCTGGGCCCAGTCTGCCCTGACTCAGCCTGCCTCCGTGTCTGGGTCTCCTGGACAGTCGATCACCATCTCCTGCACTGGATCCAGCAGTGACGTTGGTGCTTATAACTATGTCTCCTGGTACCAACAACACCCAGGCAAAGCCCCCAAACTCATGATTTATGATGTCAGTAATCGGCCCTCAGGGGTTTCTAATCGCTTCTCTGGCTCCAAGTCTGGCAACACGGCCTCCCTGACCATCTCTGGGCTCCAGGCTGAGGACGAGGCTGATTATTACTGCAGCTCATATACAAGAATCAGCACTCTTTATGTCTTCGGAACTGGGACCAAGGTCACCGTCCTAGG	LV2-14	LJ1	SSYTRISTLYV	11	1.8018
c28922	149812	NN	ATGGACTGGACCTGGAGGTTCCTCTTTGTGGTGGCAGCAGCCACAGGTGTCCAGTTCCAGGTCCAGCTGGTGCAGTCTGGGGCTGAGGTGAAGAAGCCTGGGTCCTCGGTGAAGGTCTCCTGCAAGACTTCTGGAGGCTCCTTCACCAGCTCTGCTATCAGCTGGGTGCGACAGGCCCCTGGACAGGGGCTTGAGTGGATGGGAAGGTTCATCCCTATCCTTGATGTAGCACACTACGCACAGCAGTTCCAGGGCAGAGTCACGATTACCGCGGACAAATCCACGACCACAGTCTACATGGAGCTGAGCAGCCTGAGATCTGAGGACACGGCCGTATATTACTGTGCGAGAGCCCCCTCTATGGCCTTCATTACTATGATAGATGGGGCAGTTTCGGAT…	IGHV1-69*04	IGHD3-22*01	IGHJ5*02	ARAPSMAFITMIDGAVSDNWFDP	23	4.08163	ATGGCCTGGGCTCTGCTATTCCTCACCCTCCTCACTCAGGGCACAGGGTCCTGGGCCCAGTCTGCCCTGACTCAGCCTGCCTCCGTGTCTGGGTCTCCTGGACAGTCGATCACCATCTCCTGCACTGGATCCAGCAGTGACGTTGGTGCTTATAACTATGTCTCCTGGTACCAACAACACCCAGGCAAAGCCCCCAAACTCATGATTTATGATGTCAGTAATCGGCCCTCAGGGGTTTCTAATCGCTTCTCTGGCTCCAAGTCTGGCAACACGGCCTCCCTGACCATCTCTGGGCTCCAGGCTGAGGACGAGGCTGATTATTACTGCAGCTCATATACAAGAATCAGCACTCTTTATGTCTTCGGAACTGGGACCAAGGTCACCGTCCTAGG	LV2-14	LJ1	SSYTRISTLYV	11	1.8018
c28889	149812	NN	ATGGACTGGACCTGGAGGATCCTCTTTTTGGTGGCAGCAGCCACAGGTGCCCACTCCCAGGTCCAGCTTGTGCAGTCTGGGGCTGAGGTGAAGAAGCCTGGGGCCTCAGTGAAGGTTTCCTGCAAGGCTTCTGGATACACCTTCACTAGCTATGCTATTCATTGGGTGCGCCAGGCCCCCGGACAAAGGCTTGAGTGGATGGGATGGATCAACGCTGGCATTGGTAACACAAAATATTCACAGAAGTTCCAGGACAGAGTCACCATTACCAGGGACACATCCGCGAGCACAGCCTACATGGAGCTGAGCAGCCTGAGATCTGAAGACACGGCTGTGTATTACTGTGCGAGAGATTCTAACGCCCCTCCTTATTACTATAATGGTCCGAGGGGGGCCTTT…	IGHV1-3*01	IGHD3-10*01	IGHJ4*02	ARDSNAPPYYYNGPRGAFDY	20	0.884956	ATGAGGCTCCCTGCTCAGCTCCTGGGGCTGCTAATGCTCTGGGTCCCAGGATCCAGTGGGGATGTTGTGATGACTCAGTCTCCACTCTCCCTGCCCGTCACCCTTGGACAGCCGGCCTCCATCTCCTGCAGGTCTAGTCAAAGCCTCGTATACAGTGATGGAAACACCTACTTGAATTGGTTTCAGCAGAGGCCAGGCCAATCTCCAAGGCGCCTAATTTATAAGGTTTCTAACCGGGACTCTGGGGTCCCAGACAGATTCAGCGGCAGTGGGTCAGGCACTGATTTCACACTGAAGATCAGCAGGGTGGAGGCTGAGGATGTTGGGGTTTATTACTGCATGCAAGGTACACACTGGCCTCTGTACACTTTTGGCCAGGGGACCAAGCTGGAGATCAAA…	KV2-30	KJ2	MQGTHWPLYT	10	0.294985
c28777	149812	NN	ATGGACTGGACCTGGAGGATCCTCTTTTTGGTGGCAGCAGCCACAGGTGCCCACTCCCAGGTCCAGCTTGTGCAGTCTGGGGCTGAGGTGAAGAAGCCTGGGGCCTCAGTGAAGGTTTCCTGCAAGGCTTCTGGATACACCTTCACTAGCTATGCTATTCATTGGGTGCGCCAGGCCCCCGGACAAAGGCTTGAGTGGATGGGATGGATCAACGCTGGCATTGGTAACACAAAATATTCACAGAAGTTCCAGGACAGAGTCACCATTACCAGGGACACATCCGCGAGCACAGCCTACATGGAGCTGAGCAGCCTGAGATCTGAAGACACGGCTGTGTATTACTGTGCGAGAGATTCTAACGCCCCTCCTTATTACTATAATGGTCCGAGGGGGGCCTTT…	IGHV1-3*01	IGHD3-10*01	IGHJ4*02	ARDSNAPPYYYNGPRGAFDY	20	0.884956	ATGAGGCTCCCTGCTCAGCTCCTGGGGCTGCTAATGCTCTGGGTCCCAGGATCCAGTGGGGATGTTGTGATGACTCAGTCTCCACTCTCCCTGCCCGTCACCCTTGGACAGCCGGCCTCCATCTCCTGCAGGTCTAGTCAAAGCCTCGTATACAGTGATGGAAACACCTACTTGAATTGGTTTCAGCAGAGGCCAGGCCAATCTCCAAGGCGCCTAATTTATAAGGTTTCTAACCGGGACTCTGGGGTCCCAGACAGATTCAGCGGCAGTGGGTCAGGCACTGATTTCACACTGAAGATCAGCAGGGTGGAGGCTGAGGATGTTGGGGTTTATTACTGCATGCAAGGTACACACTGGCCTCTGTACACTTTTGGCCAGGGGACCAAGCTGGAGATCAAA…	KV2-30	KJ2	MQGTHWPLYT	10	0.294985
c29034	149812	NN	ATGGACTGGACCTGGAGGATCCTCTTTTTGGTGGCAGCAGCCACAGGTGCCCACTCCCAGGTCCAGCTTGTGCAGTCTGGGGCTGAGGTGAAGAAGCCTGGGGCCTCAGTGAAGGTTTCCTGCAAGGCTTCTGGATACACCTTCACTAGCTATGCTATTCATTGGGTGCGCCAGGCCCCCGGACAAAGGCTTGAGTGGATGGGATGGATCAACGCTGGCATTGGTAACACAAAATATTCACAGAAGTTCCAGGACAGAGTCACCATTACCAGGGACACATCCGCGAGCACAGCCTACATGGAGCTGAGCAGCCTGAGATCTGAAGACACGGCTGTGTATTACTGTGCGAGAGATTCTAACGCCCCTCCTTATTACTATAATGGTCCGAGGGGGGCCTTT…	IGHV1-3*01	IGHD3-10*01	IGHJ4*02	ARDSNAPPYYYNGPRGAFDY	20	0.884956	ATGAGGCTCCCTGCTCAGCTCCTGGGGCTGCTAATGCTCTGGGTCCCAGGATCCAGTGGGGATGTTGTGATGACTCAGTCTCCACTCTCCCTGCCCGTCACCCTTGGACAGCCGGCCTCCATCTCCTGCAGGTCTAGTCAAAGCCTCGTATACAGTGATGGAAACACCTACTTGAATTGGTTTCAGCAGAGGCCAGGCCAATCTCCAAGGCGCCTAATTTATAAGGTTTCTAACCGGGACTCTGGGGTCCCAGACAGATTCAGCGGCAGTGGGTCAGGCACTGATTTCACACTGAAGATCAGCAGGGTGGAGGCTGAGGATGTTGGGGTTTATTACTGCATGCAAGGTACACACTGGCCTCTGTACACTTTTGGCCAGGGGACCAAGCTGGAGATCAAA…	KV2-30	KJ2	MQGTHWPLYT	10	0.294985
c28776	149812	NN	ATGGACTGGACCTGGAGGATCCTCTTTTTGGTGGCAGCAGCCACAGGTGCCCACTCCCAGGTCCAGCTTGTGCAGTCTGGGGCTGAGGTGAAGAAGCCTGGGGCCTCAGTGAAGGTTTCCTGCAAGGCTTCTGGATACACCTTCACTAGCTATGCTATTCATTGGGTGCGCCAGGCCCCCGGACAAAGGCTTGAGTGGATGGGATGGATCAACGCTGGCATTGGTAACACAAAATATTCACAGAAGTTCCAGGACAGAGTCACCATTACCAGGGACACATCCGCGAGCACAGCCTACATGGAGCTGAGCAGCCTGAGATCTGAAGACACGGCTGTGTATTACTGTGCGAGAGATTCTAACGCCCCTCCTTATTACTATAATGGTCCGAGGGGGGCCTTT…	IGHV1-3*01	IGHD3-10*01	IGHJ4*02	ARDSNAPPYYYNGPRGAFDY	20	0.884956	ATGAGGCTCCCTGCTCAGCTCCTGGGGCTGCTAATGCTCTGGGTCCCAGGATCCAGTGGGGATGTTGTGATGACTCAGTCTCCACTCTCCCTGCCCGTCACCCTTGGACAGCCGGCCTCCATCTCCTGCAGGTCTAGTCAAAGCCTCGTATACAGTGATGGAAACACCTACTTGAATTGGTTTCAGCAGAGGCCAGGCCAATCTCCAAGGCGCCTAATTTATAAGGTTTCTAACCGGGACTCTGGGGTCCCAGACAGATTCAGCGGCAGTGGGTCAGGCACTGATTTCACACTGAAGATCAGCAGGGTGGAGGCTGAGGATGTTGGGGTTTATTACTGCATGCAAGGTACACACTGGCCTCTGTACACTTTTGGCCAGGGGACCAAGCTGGAGATCAAA…	KV2-30	KJ2	MQGTHWPLYT	10	0.294985
c29223	149812	NN	ATGGACTGGACCTGGAGGATCCTCTTTTTGGTGGCAGCAGCCACAGGTGCCCACTCCCAGGTCCAGCTTGTGCAGTCTGGGGCTGAGGTGAAGAAGCCTGGGGCCTCAGTGAAGGTTTCCTGCAAGGCTTCTGGATACACCTTCACTAGCTATGCTATTCATTGGGTGCGCCAGGCCCCCGGACAAAGGCTTGAGTGGATGGGATGGATCAACGCTGGCATTGGTAACACAAAATATTCACAGAAGTTCCAGGACAGAGTCACCATTACCAGGGACACATCCGCGAGCACAGCCTACATGGAGCTGAGCAGCCTGAGATCTGAAGACACGGCTGTGTATTACTGTGCGAGAGATTCTAACGCCCCTCCTTATTACTATAATGGTCCGAGGGGGGCCTTT…	IGHV1-3*01	IGHD3-10*01	IGHJ4*02	ARDSNAPPYYYNGPRGAFDY	20	0.884956	ATGAGGCTCCCTGCTCAGCTCCTGGGGCTGCTAATGCTCTGGGTCCCAGGATCCAGTGGGGATGTTGTGATGACTCAGTCTCCACTCTCCCTGCCCGTCACCCTTGGACAGCCGGCCTCCATCTCCTGCAGGTCTAGTCAAAGCCTCGTATACAGTGATGGAAACACCTACTTGAATTGGTTTCAGCAGAGGCCAGGCCAATCTCCAAGGCGCCTAATTTATAAGGTTTCTAACCGGGACTCTGGGGTCCCAGACAGATTCAGCGGCAGTGGGTCAGGCACTGATTTCACACTGAAGATCAGCAGGGTGGAGGCTGAGGATGTTGGGGTTTATTACTGCATGCAAGGTACACACTGGCCTCTGTACACTTTTGGCCAGGGGACCAAGCTGGAGATCAAA…	KV2-30	KJ2	MQGTHWPLYT	10	0.294985
c28868	149812	NN	ATGGACTGGACCTGGAGGATCCTCTTTTTGGTGGCAGCAGCCACAGGTGCCCACTCCCAGGTCCAGCTTGTGCAGTCTGGGGCTGAGGTGAAGAAGCCTGGGGCCTCAGTGAAGGTTTCCTGCAAGGCTTCTGGATACACCTTCACTAGCTATGCTATTCATTGGGTGCGCCAGGCCCCCGGACAAAGGCTTGAGTGGATGGGATGGATCAACGCTGGCATTGGTAACACAAAATATTCACAGAAGTTCCAGGACAGAGTCACCATTACCAGGGACACATCCGCGAGCACAGCCTACATGGAGCTGAGCAGCCTGAGATCTGAAGACACGGCTGTGTATTACTGTGCGAGAGATTCTAACGCCCCTCCTTATTACTATAATGGTCCGAGGGGGGCCTTT…	IGHV1-3*01	IGHD3-10*01	IGHJ4*02	ARDSNAPPYYYNGPRGAFDY	20	0.884956	ATGAGGCTCCCTGCTCAGCTCCTGGGGCTGCTAATGCTCTGGGTCCCAGGATCCAGTGGGGATGTTGTGATGACTCAGTCTCCACTCTCCCTGCCCGTCACCCTTGGACAGCCGGCCTCCATCTCCTGCAGGTCTAGTCAAAGCCTCGTATACAGTGATGGAAACACCTACTTGAATTGGTTTCAGCAGAGGCCAGGCCAATCTCCAAGGCGCCTAATTTATAAGGTTTCTAACCGGGACTCTGGGGTCCCAGACAGATTCAGCGGCAGTGGGTCAGGCACTGATTTCACACTGAAGATCAGCAGGGTGGAGGCTGAGGATGTTGGGGTTTATTACTGCATGCAAGGTACACACTGGCCTCTGTACACTTTTGGCCAGGGGACCAAGCTGGAGATCAAA…	KV2-30	KJ2	MQGTHWPLYT	10	0.294985
c28667	149812	NN	ATGGACTGGACCTGGAGGATCCTCTTTTTGGTGGCAGCAGCCACAGGTGCCCACTCCCAGGTCCAGCTTGTGCAGTCTGGGGCTGAGGTGAAGAAGCCTGGGGCCTCAGTGAAGGTTTCCTGCAAGGCTTCTGGATACACCTTCACTAGCTATGCTATTCATTGGGTGCGCCAGGCCCCCGGACAAAGGCTTGAGTGGATGGGATGGATCAACGCTGGCATTGGTAACACAAAATATTCACAGAAGTTCCAGGACAGAGTCACCATTACCAGGGACACATCCGCGAGCACAGCCTACATGGAGCTGAGCAGCCTGAGATCTGAAGACACGGCTGTGTATTACTGTGCGAGAGATTCTAACGCCCCTCCTTATTACTATAATGGTCCGAGGGGGGCCTTT…	IGHV1-3*01	IGHD3-10*01	IGHJ4*02	ARDSNAPPYYYNGPRGAFDY	20	0.884956	ATGAGGCTCCCTGCTCAGCTCCTGGGGCTGCTAATGCTCTGGGTCCCAGGATCCAGTGGGGATGTTGTGATGACTCAGTCTCCACTCTCCCTGCCCGTCACCCTTGGACAGCCGGCCTCCATCTCCTGCAGGTCTAGTCAAAGCCTCGTATACAGTGATGGAAACACCTACTTGAATTGGTTTCAGCAGAGGCCAGGCCAATCTCCAAGGCGCCTAATTTATAAGGTTTCTAACCGGGACTCTGGGGTCCCAGACAGATTCAGCGGCAGTGGGTCAGGCACTGATTTCACACTGAAGATCAGCAGGGTGGAGGCTGAGGATGTTGGGGTTTATTACTGCATGCAAGGTACACACTGGCCTCTGTACACTTTTGGCCAGGGGACCAAGCTGGAGATCAAA…	KV2-30	KJ2	MQGTHWPLYT	10	0.294985
c28995	149812	NN	ATGGACTGGACCTGGAGGATCCTCTTTTTGGTGGCAGCAGCCACAGGTGCCCACTCCCAGGTCCAGCTTGTGCAGTCTGGGGCTGAGGTGAAGAAGCCTGGGGCCTCAGTGAAGGTTTCCTGCAAGGCTTCTGGATACACCTTCACTAGCTATGCTATTCATTGGGTGCGCCAGGCCCCCGGACAAAGGCTTGAGTGGATGGGATGGATCAACGCTGGCATTGGTAACACAAAATATTCACAGAAGTTCCAGGACAGAGTCACCATTACCAGGGACACATCCGCGAGCACAGCCTACATGGAGCTGAGCAGCCTGAGATCTGAAGACACGGCTGTGTATTACTGTGCGAGAGATTCTAACGCCCCTCCTTATTACTATAATGGTCCGAGGGGGGCCTTT…	IGHV1-3*01	IGHD3-10*01	IGHJ4*02	ARDSNAPPYYYNGPRGAFDY	20	0.884956	ATGAGGCTCCCTGCTCAGCTCCTGGGGCTGCTAATGCTCTGGGTCCCAGGATCCAGTGGGGATGTTGTGATGACTCAGTCTCCACTCTCCCTGCCCGTCACCCTTGGACAGCCGGCCTCCATCTCCTGCAGGTCTAGTCAAAGCCTCGTATACAGTGATGGAAACACCTACTTGAATTGGTTTCAGCAGAGGCCAGGCCAATCTCCAAGGCGCCTAATTTATAAGGTTTCTAACCGGGACTCTGGGGTCCCAGACAGATTCAGCGGCAGTGGGTCAGGCACTGATTTCACACTGAAGATCAGCAGGGTGGAGGCTGAGGATGTTGGGGTTTATTACTGCATGCAAGGTACACACTGGCCTCTGTACACTTTTGGCCAGGGGACCAAGCTGGAGATCAAA…	KV2-30	KJ2	MQGTHWPLYT	10	0.294985
c28973	149812	NN	ATGGACTGGACCTGGAGGATCCTCTTTTTGGTGGCAGCAGCCACAGGTGCCCACTCCCAGGTCCAGCTTGTGCAGTCTGGGGCTGAGGTGAAGAAGCCTGGGGCCTCAGTGAAGGTTTCCTGCAAGGCTTCTGGATACACCTTCACTAGCTATGCTATTCATTGGGTGCGCCAGGCCCCCGGACAAAGGCTTGAGTGGATGGGATGGATCAACGCTGGCATTGGTAACACAAAATATTCACAGAAGTTCCAGGACAGAGTCACCATTACCAGGGACACATCCGCGAGCACAGCCTACATGGAGCTGAGCAGCCTGAGATCTGAAGACACGGCTGTGTATTACTGTGCGAGAGATTCTAACGCCCCTCCTTATTACTATAATGGTCCGAGGGGGGCCTTT…	IGHV1-3*01	IGHD3-10*01	IGHJ4*02	ARDSNAPPYYYNGPRGAFDY	20	0.884956	ATGAGGCTCCCTGCTCAGCTCCTGGGGCTGCTAATGCTCTGGGTCCCAGGATCCAGTGGGGATGTTGTGATGACTCAGTCTCCACTCTCCCTGCCCGTCACCCTTGGACAGCCGGCCTCCATCTCCTGCAGGTCTAGTCAAAGCCTCGTATACAGTGATGGAAACACCTACTTGAATTGGTTTCAGCAGAGGCCAGGCCAATCTCCAAGGCGCCTAATTTATAAGGTTTCTAACCGGGACTCTGGGGTCCCAGACAGATTCAGCGGCAGTGGGTCAGGCACTGATTTCACACTGAAGATCAGCAGGGTGGAGGCTGAGGATGTTGGGGTTTATTACTGCATGCAAGGTACACACTGGCCTCTGTACACTTTTGGCCAGGGGACCAAGCTGGAGATCAAA…	KV2-30	KJ2	MQGTHWPLYT	10	0.294985
c28798	149812	NN	ATGGACTGGACCTGGAGGATCCTCTTCTTGGTGGCAGCAGCCACAGGAGCCCACTCCCAGGTGCAGCTCCTGCAGTCTGGGGCTGAGGTGAAGAAGCCTGGGGCCTCAGTGAAGGTCTCCTGCAAGGCTTCTGGATACAGCTTCACCGGCTACTTAATGCACTGGGTGCGGCAGGCCCCTGGACAAGGGCTTCAGTGGATGGGAGGCATCAACCCTAGCAGTGGTGACACAAAATATGCACAGACCTTTCAGGGCAGGGTCACCATGACCAGGGACCCGTCCATGAGGACAGCCTACATGGAGCTGAGGAGCCTAAGATCTGACGACACGGCCGTGTATTACTGTGCGAGAATACGATTGGGCTACGGTATGGACGTCTGGGGCCAAGGGACCACGGTC…	IGHV1-2*02	IGHD3-3*01	IGHJ6*02	ARIRLGYGMDV	11	5.53936	ATGGCCAGCTTCCCTCTCCTCCTCACCCTCCTCACTCACTGTGCAGGGTCCTGGGCCCAGTCTGTGCTGACTCAGCCACCCTCAGCGTCTGGGACCCCCGGGCAGAGGGTCACCATCTCTTGTTCTGGAAGCAGCTCCAACATCGGAAGTAATACTGTAAATTGGTACCAGCAGCTCCCAGGAACGGCCCCCAAATTCCTCATCTATAGTAATGATCAGCGGCCCTCAGGGGTCCCTGACCGATTCTCTGGCTCCAAGTCTGGCACCTCAGTCTCCCTGGCCATCAGTGGGCTCCAGTCTGAGGATGAGGCTGATTATTATTGTGCAACATGGGATGACAGCCTGAATGGTTGGGTGTTCGGCGGAGGGACCAAGCTGACCGTCTTAGG	LV1-44	LJ3	ATWDDSLNGWV	11	1.83486
c29009	149812	NN	ATGGACTGGACCTGGAGGATCCTCTTCTTGGTGGCAGCAGCCACAGGAGCCCACTCCCAGGTGCAGCTCCTGCAGTCTGGGGCTGAGGTGAAGAAGCCTGGGGCCTCAGTGAAGGTCTCCTGCAAGGCTTCTGGATACAGCTTCACCGGCTACTTAATGCACTGGGTGCGGCAGGCCCCTGGACAAGGGCTTCAGTGGATGGGAGGCATCAACCCTAGCAGTGGTGACACAAAATATGCACAGACCTTTCAGGGCAGGGTCACCATGACCAGGGACCCGTCCATGAGGACAGCCTACATGGAGCTGAGGAGCCTAAGATCTGACGACACGGCCGTGTATTACTGTGCGAGAATACGATTGGGCTACGGTATGGACGTCTGGGGCCAAGGGACCACGGTC…	IGHV1-2*02	IGHD3-3*01	IGHJ6*02	ARIRLGYGMDV	11	5.53936	ATGGCCAGCTTCCCTCTCCTCCTCACCCTCCTCACTCACTGTGCAGGGTCCTGGGCCCAGTCTGTGCTGACTCAGCCACCCTCAGCGTCTGGGACCCCCGGGCAGAGGGTCACCATCTCTTGTTCTGGAAGCAGCTCCAACATCGGAAGTAATACTGTAAATTGGTACCAGCAGCTCCCAGGAACGGCCCCCAAATTCCTCATCTATAGTAATGATCAGCGGCCCTCAGGGGTCCCTGACCGATTCTCTGGCTCCAAGTCTGGCACCTCAGTCTCCCTGGCCATCAGTGGGCTCCAGTCTGAGGATGAGGCTGATTATTATTGTGCAACATGGGATGACAGCCTGAATGGTTGGGTGTTCGGCGGAGGGACCAAGCTGACCGTCTTAGG	LV1-44	LJ3	ATWDDSLNGWV	11	1.83486
c29013	149812	NN	ATGGACTGGACCTGGAGGATCCTCTTCTTGGTGGCAGCAGCCACAGGAGCCCACTCCCAGGTGCAGCTCCTGCAGTCTGGGGCTGAGGTGAAGAAGCCTGGGGCCTCAGTGAAGGTCTCCTGCAAGGCTTCTGGATACAGCTTCACCGGCTACTTAATGCACTGGGTGCGGCAGGCCCCTGGACAAGGGCTTCAGTGGATGGGAGGCATCAACCCTAGCAGTGGTGACACAAAATATGCACAGACCTTTCAGGGCAGGGTCACCATGACCAGGGACCCGTCCATGAGGACAGCCTACATGGAGCTGAGGAGCCTAAGATCTGACGACACGGCCGTGTATTACTGTGCGAGAATACGATTGGGCTACGGTATGGACGTCTGGGGCCAAGGGACCACGGTC…	IGHV1-2*02	IGHD3-3*01	IGHJ6*02	ARIRLGYGMDV	11	5.53936	ATGGCCAGCTTCCCTCTCCTCCTCACCCTCCTCACTCACTGTGCAGGGTCCTGGGCCCAGTCTGTGCTGACTCAGCCACCCTCAGCGTCTGGGACCCCCGGGCAGAGGGTCACCATCTCTTGTTCTGGAAGCAGCTCCAACATCGGAAGTAATACTGTAAATTGGTACCAGCAGCTCCCAGGAACGGCCCCCAAATTCCTCATCTATAGTAATGATCAGCGGCCCTCAGGGGTCCCTGACCGATTCTCTGGCTCCAAGTCTGGCACCTCAGTCTCCCTGGCCATCAGTGGGCTCCAGTCTGAGGATGAGGCTGATTATTATTGTGCAACATGGGATGACAGCCTGAATGGTTGGGTGTTCGGCGGAGGGACCAAGCTGACCGTCTTAGG	LV1-44	LJ3	ATWDDSLNGWV	11	1.83486
c28704	149812	NN	ATGGACTGGACCTGGAGGATCCTCTTCTTGGTGGCAGCAGCCACAGGAGCCCACTCCCAGGTGCAGCTCCTGCAGTCTGGGGCTGAGGTGAAGAAGCCTGGGGCCTCAGTGAAGGTCTCCTGCAAGGCTTCTGGATACAGCTTCACCGGCTACTTAATGCACTGGGTGCGGCAGGCCCCTGGACAAGGGCTTCAGTGGATGGGAGGCATCAACCCTAGCAGTGGTGACACAAAATATGCACAGACCTTTCAGGGCAGGGTCACCATGACCAGGGACCCGTCCATGAGGACAGCCTACATGGAGCTGAGGAGCCTAAGATCTGACGACACGGCCGTGTATTACTGTGCGAGAATACGATTGGGCTACGGTATGGACGTCTGGGGCCAAGGGACCACGGTC…	IGHV1-2*02	IGHD3-3*01	IGHJ6*02	ARIRLGYGMDV	11	5.53936	ATGGCCAGCTTCCCTCTCCTCCTCACCCTCCTCACTCACTGTGCAGGGTCCTGGGCCCAGTCTGTGCTGACTCAGCCACCCTCAGCGTCTGGGACCCCCGGGCAGAGGGTCACCATCTCTTGTTCTGGAAGCAGCTCCAACATCGGAAGTAATACTGTAAATTGGTACCAGCAGCTCCCAGGAACGGCCCCCAAATTCCTCATCTATAGTAATGATCAGCGGCCCTCAGGGGTCCCTGACCGATTCTCTGGCTCCAAGTCTGGCACCTCAGTCTCCCTGGCCATCAGTGGGCTCCAGTCTGAGGATGAGGCTGATTATTATTGTGCAACATGGGATGACAGCCTGAATGGTTGGGTGTTCGGCGGAGGGACCAAGCTGACCGTCTTAGG	LV1-44	LJ3	ATWDDSLNGWV	11	1.83486
c28712	149812	NN	ATGGACTGGACCTGGAGGATCCTCTTCTTGGTGGCAGCAGCCACAGGAGCCCACTCCCAGGTGCAGCTCCTGCAGTCTGGGGCTGAGGTGAAGAAGCCTGGGGCCTCAGTGAAGGTCTCCTGCAAGGCTTCTGGATACAGCTTCACCGGCTACTTAATGCACTGGGTGCGGCAGGCCCCTGGACAAGGGCTTCAGTGGATGGGAGGCATCAACCCTAGCAGTGGTGACACAAAATATGCACAGACCTTTCAGGGCAGGGTCACCATGACCAGGGACCCGTCCATGAGGACAGCCTACATGGAGCTGAGGAGCCTAAGATCTGACGACACGGCCGTGTATTACTGTGCGAGAATACGATTGGGCTACGGTATGGACGTCTGGGGCCAAGGGACCACGGTC…	IGHV1-2*02	IGHD3-3*01	IGHJ6*02	ARIRLGYGMDV	11	5.53936	ATGGCCAGCTTCCCTCTCCTCCTCACCCTCCTCACTCACTGTGCAGGGTCCTGGGCCCAGTCTGTGCTGACTCAGCCACCCTCAGCGTCTGGGACCCCCGGGCAGAGGGTCACCATCTCTTGTTCTGGAAGCAGCTCCAACATCGGAAGTAATACTGTAAATTGGTACCAGCAGCTCCCAGGAACGGCCCCCAAATTCCTCATCTATAGTAATGATCAGCGGCCCTCAGGGGTCCCTGACCGATTCTCTGGCTCCAAGTCTGGCACCTCAGTCTCCCTGGCCATCAGTGGGCTCCAGTCTGAGGATGAGGCTGATTATTATTGTGCAACATGGGATGACAGCCTGAATGGTTGGGTGTTCGGCGGAGGGACCAAGCTGACCGTCTTAGG	LV1-44	LJ3	ATWDDSLNGWV	11	1.83486
c28963	149812	NN	ATGGACTGGACCTGGAGGATCCTCTTCTTGGTGGCAGCAGCCACAGGAGCCCACTCCCAGGTGCAGCTCCTGCAGTCTGGGGCTGAGGTGAAGAAGCCTGGGGCCTCAGTGAAGGTCTCCTGCAAGGCTTCTGGATACAGCTTCACCGGCTACTTAATGCACTGGGTGCGGCAGGCCCCTGGACAAGGGCTTCAGTGGATGGGAGGCATCAACCCTAGCAGTGGTGACACAAAATATGCACAGACCTTTCAGGGCAGGGTCACCATGACCAGGGACCCGTCCATGAGGACAGCCTACATGGAGCTGAGGAGCCTAAGATCTGACGACACGGCCGTGTATTACTGTGCGAGAATACGATTGGGCTACGGTATGGACGTCTGGGGCCAAGGGACCACGGTC…	IGHV1-2*02	IGHD3-3*01	IGHJ6*02	ARIRLGYGMDV	11	5.53936	ATGGCCAGCTTCCCTCTCCTCCTCACCCTCCTCACTCACTGTGCAGGGTCCTGGGCCCAGTCTGTGCTGACTCAGCCACCCTCAGCGTCTGGGACCCCCGGGCAGAGGGTCACCATCTCTTGTTCTGGAAGCAGCTCCAACATCGGAAGTAATACTGTAAATTGGTACCAGCAGCTCCCAGGAACGGCCCCCAAATTCCTCATCTATAGTAATGATCAGCGGCCCTCAGGGGTCCCTGACCGATTCTCTGGCTCCAAGTCTGGCACCTCAGTCTCCCTGGCCATCAGTGGGCTCCAGTCTGAGGATGAGGCTGATTATTATTGTGCAACATGGGATGACAGCCTGAATGGTTGGGTGTTCGGCGGAGGGACCAAGCTGACCGTCTTAGG	LV1-44	LJ3	ATWDDSLNGWV	11	1.83486
c28880	149812	NN	ATGGACTGGACCTGGAGGATCCTCTTCTTGGTGGCAGCAGCCACAGGAGCCCACTCCCAGGTGCAGCTCCTGCAGTCTGGGGCTGAGGTGAAGAAGCCTGGGGCCTCAGTGAAGGTCTCCTGCAAGGCTTCTGGATACAGCTTCACCGGCTACTTAATGCACTGGGTGCGGCAGGCCCCTGGACAAGGGCTTCAGTGGATGGGAGGCATCAACCCTAGCAGTGGTGACACAAAATATGCACAGACCTTTCAGGGCAGGGTCACCATGACCAGGGACCCGTCCATGAGGACAGCCTACATGGAGCTGAGGAGCCTAAGATCTGACGACACGGCCGTGTATTACTGTGCGAGAATACGATTGGGCTACGGTATGGACGTCTGGGGCCAAGGGACCACGGTC…	IGHV1-2*02	IGHD3-3*01	IGHJ6*02	ARIRLGYGMDV	11	5.53936	ATGGCCAGCTTCCCTCTCCTCCTCACCCTCCTCACTCACTGTGCAGGGTCCTGGGCCCAGTCTGTGCTGACTCAGCCACCCTCAGCGTCTGGGACCCCCGGGCAGAGGGTCACCATCTCTTGTTCTGGAAGCAGCTCCAACATCGGAAGTAATACTGTAAATTGGTACCAGCAGCTCCCAGGAACGGCCCCCAAATTCCTCATCTATAGTAATGATCAGCGGCCCTCAGGGGTCCCTGACCGATTCTCTGGCTCCAAGTCTGGCACCTCAGTCTCCCTGGCCATCAGTGGGCTCCAGTCTGAGGATGAGGCTGATTATTATTGTGCAACATGGGATGACAGCCTGAATGGTTGGGTGTTCGGCGGAGGGACCAAGCTGACCGTCTTAGG	LV1-44	LJ3	ATWDDSLNGWV	11	1.83486
c29152	149812	NN	ATGGACTGGACCTGGAGGATCCTCTTCTTGGTGGCAGCAGCCACAGGAGCCCACTCCCAGGTGCAGCTCCTGCAGTCTGGGGCTGAGGTGAAGAAGCCTGGGGCCTCAGTGAAGGTCTCCTGCAAGGCTTCTGGATACAGCTTCACCGGCTACTTAATGCACTGGGTGCGGCAGGCCCCTGGACAAGGGCTTCAGTGGATGGGAGGCATCAACCCTAGCAGTGGTGACACAAAATATGCACAGACCTTTCAGGGCAGGGTCACCATGACCAGGGACCCGTCCATGAGGACAGCCTACATGGAGCTGAGGAGCCTAAGATCTGACGACACGGCCGTGTATTACTGTGCGAGAATACGATTGGGCTACGGTATGGACGTCTGGGGCCAAGGGACCACGGTC…	IGHV1-2*02	IGHD3-3*01	IGHJ6*02	ARIRLGYGMDV	11	5.53936	ATGGCCAGCTTCCCTCTCCTCCTCACCCTCCTCACTCACTGTGCAGGGTCCTGGGCCCAGTCTGTGCTGACTCAGCCACCCTCAGCGTCTGGGACCCCCGGGCAGAGGGTCACCATCTCTTGTTCTGGAAGCAGCTCCAACATCGGAAGTAATACTGTAAATTGGTACCAGCAGCTCCCAGGAACGGCCCCCAAATTCCTCATCTATAGTAATGATCAGCGGCCCTCAGGGGTCCCTGACCGATTCTCTGGCTCCAAGTCTGGCACCTCAGTCTCCCTGGCCATCAGTGGGCTCCAGTCTGAGGATGAGGCTGATTATTATTGTGCAACATGGGATGACAGCCTGAATGGTTGGGTGTTCGGCGGAGGGACCAAGCTGACCGTCTTAGG	LV1-44	LJ3	ATWDDSLNGWV	11	1.83486
c28907	149812	NN	ATGGACTGGACCTGGAGGATCCTCTTCTTGGTGGCAGCAGCCACAGGAGCCCACTCCCAGGTGCAGCTCCTGCAGTCTGGGGCTGAGGTGAAGAAGCCTGGGGCCTCAGTGAAGGTCTCCTGCAAGGCTTCTGGATACAGCTTCACCGGCTACTTAATGCACTGGGTGCGGCAGGCCCCTGGACAAGGGCTTCAGTGGATGGGAGGCATCAACCCTAGCAGTGGTGACACAAAATATGCACAGACCTTTCAGGGCAGGGTCACCATGACCAGGGACCCGTCCATGAGGACAGCCTACATGGAGCTGAGGAGCCTAAGATCTGACGACACGGCCGTGTATTACTGTGCGAGAATACGATTGGGCTACGGTATGGACGTCTGGGGCCAAGGGACCACGGTC…	IGHV1-2*02	IGHD3-3*01	IGHJ6*02	ARIRLGYGMDV	11	5.53936	ATGGCCAGCTTCCCTCTCCTCCTCACCCTCCTCACTCACTGTGCAGGGTCCTGGGCCCAGTCTGTGCTGACTCAGCCACCCTCAGCGTCTGGGACCCCCGGGCAGAGGGTCACCATCTCTTGTTCTGGAAGCAGCTCCAACATCGGAAGTAATACTGTAAATTGGTACCAGCAGCTCCCAGGAACGGCCCCCAAATTCCTCATCTATAGTAATGATCAGCGGCCCTCAGGGGTCCCTGACCGATTCTCTGGCTCCAAGTCTGGCACCTCAGTCTCCCTGGCCATCAGTGGGCTCCAGTCTGAGGATGAGGCTGATTATTATTGTGCAACATGGGATGACAGCCTGAATGGTTGGGTGTTCGGCGGAGGGACCAAGCTGACCGTCTTAGG	LV1-44	LJ3	ATWDDSLNGWV	11	1.83486
c28735	149812	NN	ATGGACTGGACCTGGAGGATCCTCTTCTTGGTGGCAGCAGCCACAGGAGCCCACTCCCAGGTGCAGCTCCTGCAGTCTGGGGCTGAGGTGAAGAAGCCTGGGGCCTCAGTGAAGGTCTCCTGCAAGGCTTCTGGATACAGCTTCACCGGCTACTTAATGCACTGGGTGCGGCAGGCCCCTGGACAAGGGCTTCAGTGGATGGGAGGCATCAACCCTAGCAGTGGTGACACAAAATATGCACAGACCTTTCAGGGCAGGGTCACCATGACCAGGGACCCGTCCATGAGGACAGCCTACATGGAGCTGAGGAGCCTAAGATCTGACGACACGGCCGTGTATTACTGTGCGAGAATACGATTGGGCTACGGTATGGACGTCTGGGGCCAAGGGACCACGGTC…	IGHV1-2*02	IGHD3-3*01	IGHJ6*02	ARIRLGYGMDV	11	5.53936	ATGGCCAGCTTCCCTCTCCTCCTCACCCTCCTCACTCACTGTGCAGGGTCCTGGGCCCAGTCTGTGCTGACTCAGCCACCCTCAGCGTCTGGGACCCCCGGGCAGAGGGTCACCATCTCTTGTTCTGGAAGCAGCTCCAACATCGGAAGTAATACTGTAAATTGGTACCAGCAGCTCCCAGGAACGGCCCCCAAATTCCTCATCTATAGTAATGATCAGCGGCCCTCAGGGGTCCCTGACCGATTCTCTGGCTCCAAGTCTGGCACCTCAGTCTCCCTGGCCATCAGTGGGCTCCAGTCTGAGGATGAGGCTGATTATTATTGTGCAACATGGGATGACAGCCTGAATGGTTGGGTGTTCGGCGGAGGGACCAAGCTGACCGTCTTAGG	LV1-44	LJ3	ATWDDSLNGWV	11	1.83486
c28950	149812	NN	ATGGACTGGACCTGGAGGATCCTCTTCTTGGTGGCAGCAGCCACAGGAGCCCACTCCCAGGTGCAGCTCCTGCAGTCTGGGGCTGAGGTGAAGAAGCCTGGGGCCTCAGTGAAGGTCTCCTGCAAGGCTTCTGGATACAGCTTCACCGGCTACTTAATGCACTGGGTGCGGCAGGCCCCTGGACAAGGGCTTCAGTGGATGGGAGGCATCAACCCTAGCAGTGGTGACACAAAATATGCACAGACCTTTCAGGGCAGGGTCACCATGACCAGGGACCCGTCCATGAGGACAGCCTACATGGAGCTGAGGAGCCTAAGATCTGACGACACGGCCGTGTATTACTGTGCGAGAATACGATTGGGCTACGGTATGGACGTCTGGGGCCAAGGGACCACGGTC…	IGHV1-2*02	IGHD3-3*01	IGHJ6*02	ARIRLGYGMDV	11	5.53936	ATGGCCAGCTTCCCTCTCCTCCTCACCCTCCTCACTCACTGTGCAGGGTCCTGGGCCCAGTCTGTGCTGACTCAGCCACCCTCAGCGTCTGGGACCCCCGGGCAGAGGGTCACCATCTCTTGTTCTGGAAGCAGCTCCAACATCGGAAGTAATACTGTAAATTGGTACCAGCAGCTCCCAGGAACGGCCCCCAAATTCCTCATCTATAGTAATGATCAGCGGCCCTCAGGGGTCCCTGACCGATTCTCTGGCTCCAAGTCTGGCACCTCAGTCTCCCTGGCCATCAGTGGGCTCCAGTCTGAGGATGAGGCTGATTATTATTGTGCAACATGGGATGACAGCCTGAATGGTTGGGTGTTCGGCGGAGGGACCAAGCTGACCGTCTTAGG	LV1-44	LJ3	ATWDDSLNGWV	11	1.83486
c28676	149812	NN	ATGGACTGGACCTGGAGGATCCTCTTCTTGGTGGCAGCAGCCACAGGAGCCCACTCCCAGGTGCAGCTCCTGCAGTCTGGGGCTGAGGTGAAGAAGCCTGGGGCCTCAGTGAAGGTCTCCTGCAAGGCTTCTGGATACAGCTTCACCGGCTACTTAATGCACTGGGTGCGGCAGGCCCCTGGACAAGGGCTTCAGTGGATGGGAGGCATCAACCCTAGCAGTGGTGACACAAAATATGCACAGACCTTTCAGGGCAGGGTCACCATGACCAGGGACCCGTCCATGAGGACAGCCTACATGGAGCTGAGGAGCCTAAGATCTGACGACACGGCCGTGTATTACTGTGCGAGAATACGATTGGGCTACGGTATGGACGTCTGGGGCCAAGGGACCACGGTC…	IGHV1-2*02	IGHD3-3*01	IGHJ6*02	ARIRLGYGMDV	11	5.53936	ATGGCCAGCTTCCCTCTCCTCCTCACCCTCCTCACTCACTGTGCAGGGTCCTGGGCCCAGTCTGTGCTGACTCAGCCACCCTCAGCGTCTGGGACCCCCGGGCAGAGGGTCACCATCTCTTGTTCTGGAAGCAGCTCCAACATCGGAAGTAATACTGTAAATTGGTACCAGCAGCTCCCAGGAACGGCCCCCAAATTCCTCATCTATAGTAATGATCAGCGGCCCTCAGGGGTCCCTGACCGATTCTCTGGCTCCAAGTCTGGCACCTCAGTCTCCCTGGCCATCAGTGGGCTCCAGTCTGAGGATGAGGCTGATTATTATTGTGCAACATGGGATGACAGCCTGAATGGTTGGGTGTTCGGCGGAGGGACCAAGCTGACCGTCTTAGG	LV1-44	LJ3	ATWDDSLNGWV	11	1.83486
c28956	149812	NN	ATGGACTGGACCTGGAGGATCCTCTTCTTGGTGGCAGCAGCCACAGGAGCCCACTCCCAGGTGCAGCTCCTGCAGTCTGGGGCTGAGGTGAAGAAGCCTGGGGCCTCAGTGAAGGTCTCCTGCAAGGCTTCTGGATACAGCTTCACCGGCTACTTAATGCACTGGGTGCGGCAGGCCCCTGGACAAGGGCTTCAGTGGATGGGAGGCATCAACCCTAGCAGTGGTGACACAAAATATGCACAGACCTTTCAGGGCAGGGTCACCATGACCAGGGACCCGTCCATGAGGACAGCCTACATGGAGCTGAGGAGCCTAAGATCTGACGACACGGCCGTGTATTACTGTGCGAGAATACGATTGGGCTACGGTATGGACGTCTGGGGCCAAGGGACCACGGTC…	IGHV1-2*02	IGHD3-3*01	IGHJ6*02	ARIRLGYGMDV	11	5.53936	ATGGCCAGCTTCCCTCTCCTCCTCACCCTCCTCACTCACTGTGCAGGGTCCTGGGCCCAGTCTGTGCTGACTCAGCCACCCTCAGCGTCTGGGACCCCCGGGCAGAGGGTCACCATCTCTTGTTCTGGAAGCAGCTCCAACATCGGAAGTAATACTGTAAATTGGTACCAGCAGCTCCCAGGAACGGCCCCCAAATTCCTCATCTATAGTAATGATCAGCGGCCCTCAGGGGTCCCTGACCGATTCTCTGGCTCCAAGTCTGGCACCTCAGTCTCCCTGGCCATCAGTGGGCTCCAGTCTGAGGATGAGGCTGATTATTATTGTGCAACATGGGATGACAGCCTGAATGGTTGGGTGTTCGGCGGAGGGACCAAGCTGACCGTCTTAGG	LV1-44	LJ3	ATWDDSLNGWV	11	1.83486
c28761	149812	NN	ATGGACTGGACCTGGAGGATCCTCTTCTTGGTGGCAGCAGCCACAGGAGCCCACTCCCAGGTGCAGCTCCTGCAGTCTGGGGCTGAGGTGAAGAAGCCTGGGGCCTCAGTGAAGGTCTCCTGCAAGGCTTCTGGATACAGCTTCACCGGCTACTTAATGCACTGGGTGCGGCAGGCCCCTGGACAAGGGCTTCAGTGGATGGGAGGCATCAACCCTAGCAGTGGTGACACAAAATATGCACAGACCTTTCAGGGCAGGGTCACCATGACCAGGGACCCGTCCATGAGGACAGCCTACATGGAGCTGAGGAGCCTAAGATCTGACGACACGGCCGTGTATTACTGTGCGAGAATACGATTGGGCTACGGTATGGACGTCTGGGGCCAAGGGACCACGGTC…	IGHV1-2*02	IGHD3-3*01	IGHJ6*02	ARIRLGYGMDV	11	5.53936	ATGGCCAGCTTCCCTCTCCTCCTCACCCTCCTCACTCACTGTGCAGGGTCCTGGGCCCAGTCTGTGCTGACTCAGCCACCCTCAGCGTCTGGGACCCCCGGGCAGAGGGTCACCATCTCTTGTTCTGGAAGCAGCTCCAACATCGGAAGTAATACTGTAAATTGGTACCAGCAGCTCCCAGGAACGGCCCCCAAATTCCTCATCTATAGTAATGATCAGCGGCCCTCAGGGGTCCCTGACCGATTCTCTGGCTCCAAGTCTGGCACCTCAGTCTCCCTGGCCATCAGTGGGCTCCAGTCTGAGGATGAGGCTGATTATTATTGTGCAACATGGGATGACAGCCTGAATGGTTGGGTGTTCGGCGGAGGGACCAAGCTGACCGTCTTAGG	LV1-44	LJ3	ATWDDSLNGWV	11	1.83486
c28925	149812	NN	ATGGACTGGACCTGGAGGATCCTCTTCTTGGTGGCAGCAGCCACAGGAGCCCACTCCCAGGTGCAGCTCCTGCAGTCTGGGGCTGAGGTGAAGAAGCCTGGGGCCTCAGTGAAGGTCTCCTGCAAGGCTTCTGGATACAGCTTCACCGGCTACTTAATGCACTGGGTGCGGCAGGCCCCTGGACAAGGGCTTCAGTGGATGGGAGGCATCAACCCTAGCAGTGGTGACACAAAATATGCACAGACCTTTCAGGGCAGGGTCACCATGACCAGGGACCCGTCCATGAGGACAGCCTACATGGAGCTGAGGAGCCTAAGATCTGACGACACGGCCGTGTATTACTGTGCGAGAATACGATTGGGCTACGGTATGGACGTCTGGGGCCAAGGGACCACGGTC…	IGHV1-2*02	IGHD3-3*01	IGHJ6*02	ARIRLGYGMDV	11	5.53936	ATGGCCAGCTTCCCTCTCCTCCTCACCCTCCTCACTCACTGTGCAGGGTCCTGGGCCCAGTCTGTGCTGACTCAGCCACCCTCAGCGTCTGGGACCCCCGGGCAGAGGGTCACCATCTCTTGTTCTGGAAGCAGCTCCAACATCGGAAGTAATACTGTAAATTGGTACCAGCAGCTCCCAGGAACGGCCCCCAAATTCCTCATCTATAGTAATGATCAGCGGCCCTCAGGGGTCCCTGACCGATTCTCTGGCTCCAAGTCTGGCACCTCAGTCTCCCTGGCCATCAGTGGGCTCCAGTCTGAGGATGAGGCTGATTATTATTGTGCAACATGGGATGACAGCCTGAATGGTTGGGTGTTCGGCGGAGGGACCAAGCTGACCGTCTTAGG	LV1-44	LJ3	ATWDDSLNGWV	11	1.83486
c28906	149812	NN	ATGGACTGGACCTGGAGGATCCTCTTCTTGGTGGCAGCAGCCACAGGAGCCCACTCCCAGGTGCAGCTCCTGCAGTCTGGGGCTGAGGTGAAGAAGCCTGGGGCCTCAGTGAAGGTCTCCTGCAAGGCTTCTGGATACAGCTTCACCGGCTACTTAATGCACTGGGTGCGGCAGGCCCCTGGACAAGGGCTTCAGTGGATGGGAGGCATCAACCCTAGCAGTGGTGACACAAAATATGCACAGACCTTTCAGGGCAGGGTCACCATGACCAGGGACCCGTCCATGAGGACAGCCTACATGGAGCTGAGGAGCCTAAGATCTGACGACACGGCCGTGTATTACTGTGCGAGAATACGATTGGGCTACGGTATGGACGTCTGGGGCCAAGGGACCACGGTC…	IGHV1-2*02	IGHD3-3*01	IGHJ6*02	ARIRLGYGMDV	11	5.53936	ATGGCCAGCTTCCCTCTCCTCCTCACCCTCCTCACTCACTGTGCAGGGTCCTGGGCCCAGTCTGTGCTGACTCAGCCACCCTCAGCGTCTGGGACCCCCGGGCAGAGGGTCACCATCTCTTGTTCTGGAAGCAGCTCCAACATCGGAAGTAATACTGTAAATTGGTACCAGCAGCTCCCAGGAACGGCCCCCAAATTCCTCATCTATAGTAATGATCAGCGGCCCTCAGGGGTCCCTGACCGATTCTCTGGCTCCAAGTCTGGCACCTCAGTCTCCCTGGCCATCAGTGGGCTCCAGTCTGAGGATGAGGCTGATTATTATTGTGCAACATGGGATGACAGCCTGAATGGTTGGGTGTTCGGCGGAGGGACCAAGCTGACCGTCTTAGG	LV1-44	LJ3	ATWDDSLNGWV	11	1.83486
c28957	149812	NN	ATGGACTGGACCTGGAGGATCCTCTTCTTGGTGGCAGCAGCCACAGGAGCCCACTCCCAGGTGCAGCTCCTGCAGTCTGGGGCTGAGGTGAAGAAGCCTGGGGCCTCAGTGAAGGTCTCCTGCAAGGCTTCTGGATACAGCTTCACCGGCTACTTAATGCACTGGGTGCGGCAGGCCCCTGGACAAGGGCTTCAGTGGATGGGAGGCATCAACCCTAGCAGTGGTGACACAAAATATGCACAGACCTTTCAGGGCAGGGTCACCATGACCAGGGACCCGTCCATGAGGACAGCCTACATGGAGCTGAGGAGCCTAAGATCTGACGACACGGCCGTGTATTACTGTGCGAGAATACGATTGGGCTACGGTATGGACGTCTGGGGCCAAGGGACCACGGTC…	IGHV1-2*02	IGHD3-3*01	IGHJ6*02	ARIRLGYGMDV	11	5.53936	ATGGCCAGCTTCCCTCTCCTCCTCACCCTCCTCACTCACTGTGCAGGGTCCTGGGCCCAGTCTGTGCTGACTCAGCCACCCTCAGCGTCTGGGACCCCCGGGCAGAGGGTCACCATCTCTTGTTCTGGAAGCAGCTCCAACATCGGAAGTAATACTGTAAATTGGTACCAGCAGCTCCCAGGAACGGCCCCCAAATTCCTCATCTATAGTAATGATCAGCGGCCCTCAGGGGTCCCTGACCGATTCTCTGGCTCCAAGTCTGGCACCTCAGTCTCCCTGGCCATCAGTGGGCTCCAGTCTGAGGATGAGGCTGATTATTATTGTGCAACATGGGATGACAGCCTGAATGGTTGGGTGTTCGGCGGAGGGACCAAGCTGACCGTCTTAGG	LV1-44	LJ3	ATWDDSLNGWV	11	1.83486
c28659	149812	NN	ATGGACTGGACCTGGAGGATCCTCTTCTTGGTGGCAGCAGCCACAGGAGCCCACTCCCAGGTGCAGCTCCTGCAGTCTGGGGCTGAGGTGAAGAAGCCTGGGGCCTCAGTGAAGGTCTCCTGCAAGGCTTCTGGATACAGCTTCACCGGCTACTTAATGCACTGGGTGCGGCAGGCCCCTGGACAAGGGCTTCAGTGGATGGGAGGCATCAACCCTAGCAGTGGTGACACAAAATATGCACAGACCTTTCAGGGCAGGGTCACCATGACCAGGGACCCGTCCATGAGGACAGCCTACATGGAGCTGAGGAGCCTAAGATCTGACGACACGGCCGTGTATTACTGTGCGAGAATACGATTGGGCTACGGTATGGACGTCTGGGGCCAAGGGACCACGGTC…	IGHV1-2*02	IGHD3-3*01	IGHJ6*02	ARIRLGYGMDV	11	5.53936	ATGGCCAGCTTCCCTCTCCTCCTCACCCTCCTCACTCACTGTGCAGGGTCCTGGGCCCAGTCTGTGCTGACTCAGCCACCCTCAGCGTCTGGGACCCCCGGGCAGAGGGTCACCATCTCTTGTTCTGGAAGCAGCTCCAACATCGGAAGTAATACTGTAAATTGGTACCAGCAGCTCCCAGGAACGGCCCCCAAATTCCTCATCTATAGTAATGATCAGCGGCCCTCAGGGGTCCCTGACCGATTCTCTGGCTCCAAGTCTGGCACCTCAGTCTCCCTGGCCATCAGTGGGCTCCAGTCTGAGGATGAGGCTGATTATTATTGTGCAACATGGGATGACAGCCTGAATGGTTGGGTGTTCGGCGGAGGGACCAAGCTGACCGTCTTAGG	LV1-44	LJ3	ATWDDSLNGWV	11	1.83486
c29102	149812	NN	ATGGACTGGACCTGGAGGATCCTCTTCTTGGTGGCAGCAGCCACAGGAGCCCACTCCCAGGTGCAGCTCCTGCAGTCTGGGGCTGAGGTGAAGAAGCCTGGGGCCTCAGTGAAGGTCTCCTGCAAGGCTTCTGGATACAGCTTCACCGGCTACTTAATGCACTGGGTGCGGCAGGCCCCTGGACAAGGGCTTCAGTGGATGGGAGGCATCAACCCTAGCAGTGGTGACACAAAATATGCACAGACCTTTCAGGGCAGGGTCACCATGACCAGGGACCCGTCCATGAGGACAGCCTACATGGAGCTGAGGAGCCTAAGATCTGACGACACGGCCGTGTATTACTGTGCGAGAATACGATTGGGCTACGGTATGGACGTCTGGGGCCAAGGGACCACGGTC…	IGHV1-2*02	IGHD3-3*01	IGHJ6*02	ARIRLGYGMDV	11	5.53936	ATGGCCAGCTTCCCTCTCCTCCTCACCCTCCTCACTCACTGTGCAGGGTCCTGGGCCCAGTCTGTGCTGACTCAGCCACCCTCAGCGTCTGGGACCCCCGGGCAGAGGGTCACCATCTCTTGTTCTGGAAGCAGCTCCAACATCGGAAGTAATACTGTAAATTGGTACCAGCAGCTCCCAGGAACGGCCCCCAAATTCCTCATCTATAGTAATGATCAGCGGCCCTCAGGGGTCCCTGACCGATTCTCTGGCTCCAAGTCTGGCACCTCAGTCTCCCTGGCCATCAGTGGGCTCCAGTCTGAGGATGAGGCTGATTATTATTGTGCAACATGGGATGACAGCCTGAATGGTTGGGTGTTCGGCGGAGGGACCAAGCTGACCGTCTTAGG	LV1-44	LJ3	ATWDDSLNGWV	11	1.83486
c29100	149812	NN	ATGGACTGGACCTGGAGGATCCTCTTCTTGGTGGCAGCAGCCACAGGAGCCCACTCCCAGGTGCAGCTCCTGCAGTCTGGGGCTGAGGTGAAGAAGCCTGGGGCCTCAGTGAAGGTCTCCTGCAAGGCTTCTGGATACAGCTTCACCGGCTACTTAATGCACTGGGTGCGGCAGGCCCCTGGACAAGGGCTTCAGTGGATGGGAGGCATCAACCCTAGCAGTGGTGACACAAAATATGCACAGACCTTTCAGGGCAGGGTCACCATGACCAGGGACCCGTCCATGAGGACAGCCTACATGGAGCTGAGGAGCCTAAGATCTGACGACACGGCCGTGTATTACTGTGCGAGAATACGATTGGGCTACGGTATGGACGTCTGGGGCCAAGGGACCACGGTC…	IGHV1-2*02	IGHD3-3*01	IGHJ6*02	ARIRLGYGMDV	11	5.53936	ATGGCCAGCTTCCCTCTCCTCCTCACCCTCCTCACTCACTGTGCAGGGTCCTGGGCCCAGTCTGTGCTGACTCAGCCACCCTCAGCGTCTGGGACCCCCGGGCAGAGGGTCACCATCTCTTGTTCTGGAAGCAGCTCCAACATCGGAAGTAATACTGTAAATTGGTACCAGCAGCTCCCAGGAACGGCCCCCAAATTCCTCATCTATAGTAATGATCAGCGGCCCTCAGGGGTCCCTGACCGATTCTCTGGCTCCAAGTCTGGCACCTCAGTCTCCCTGGCCATCAGTGGGCTCCAGTCTGAGGATGAGGCTGATTATTATTGTGCAACATGGGATGACAGCCTGAATGGTTGGGTGTTCGGCGGAGGGACCAAGCTGACCGTCTTAGG	LV1-44	LJ3	ATWDDSLNGWV	11	1.83486
c28890	149812	NN	ATGGAACTGGGGCTCCGCTGGGTTTTCCTTGTTGCTATTTTAGAAGGTGTCCAGTGTGAGGTGCAGCTGGTGGAGTCTGGGGGAGGCCTGGTCAAGCCTGGGGGGTCCCTGAGACTCTCCTGTGCAGCCTCTGGATTCACCTTCAGTAGCTATAGCATGAGCTGGGTCCGCCAGGCTCCAGGGAAGGGGCTGGAGTGGGTCTCATCCATCAGTACTAGTAGTAGTTACATATACTACGCAGACTCACTGAAGGGCCGATTCACCATCTCCAGAGACAACGCCAAGAACTCACTGTATCTGCAAATTAACAGCCTGAGAGCCGAGGACACGGCTGTGTATTATTGTGCGAGAGGAAACGATTTTTGGAGTGGTTATTATACGGGATGGTTCGACCCCTGG…	IGHV3-21*01	IGHD3-3*01	IGHJ5*02	ARGNDFWSGYYTGWFDP	17	1.76471	ATGGAAACCCCAGCGCAGCTTCTCTTCCTCCTGCTACTCTGGCTCCCAGATACCACCGGAGAAATTGTGTTGACGCAGTCTCCAGGCACCCTGTCTTTGTCTCCAGGGGAAAGAGCCACCCTCTCCTGCAGGGCCAGTCAGAGTGTTAGCAGCAGGTACTTAGCCTGGTACCAGCAGAAAGCTGGCCAGGCTCCCAGGCTCCTCATCTATGGTGCATCCACCAGGGCCACTGGCATCCCAGACAGGTTCAGTGGCAGTGGGTCTGGGACAGACTTCACTCTCACCATCAGCAGACTGGAGCCTGAAGATTTTGCAGTGTATTACTGTCAGCAGTATGGTAGCTCACCTCCGGTCACCTTCGGCCAAGGGACACGAGTGGAGATAAAACG	KV3-20	KJ5	QQYGSSPPVT	10	1.53846
c28886	149812	NN	ATGGACCTCCTGCACAAGAACATGAAACACCTGTGGTTCTTCCTCCTCCTGGTGGCAGCTCCCAGATGGGTCCTGTCCCAGGTGCAGCTACAGCAGTGGGGCGCAGGACTGTTGAAGCCTTCGGAGACCCTGTCCCTCACCTGCACTGTCTATGGTGGGTCCTTCAGTGGTTACTACTGGAGTTGGATCCGCCAGCCCCCAGGGAAGGGGCTGGAGTGGATTGGGGAAATCAATCATAGTGGAAGCACCAACTACAACCCGTCCCTCAAGAGTCGAGTCACCATATTAGCAGACACGTCCAAGAACCAGTTCTCCCTGAAGCTGAGCTCTGTGACCGCCGCGGACACGGCTGTATATTACTGTGCGAGAACTTACTTTGGTTCGGGGAGTTATTTAGTC…	IGHV4-34*01	IGHD3-10*01	IGHJ6*02	ARTYFGSGSYLVLLDYYYYGMDV	23	1.42857	ATGGCCTGGCCTCCTCTCCTCCTCACTCTCCTCGCTCACTGCACAGGGTCCTGGGCCCAGTCTGTGCTGACGCAGCCGCCCTCAGTGTCTGGGGCCCCAGGGCAGAGGGTCACCATCTCCTGCACTGGGAGCAGCTCCAACATCGGGGCAGGTTATGATGTACACTGGTACCAGCAGCTTCCAGAAACAGCCCCCAAACTCCTCATCTATGGTAACAGCAATCGGCCCTCAGGGGTCCCTGACCGATTCTCTGGCTCCAAGTCTGGCACCTCAGCCTCCCTGGCCATCACTGGGCTCCAGGCTGAGGATGAGGCTGATTATTACTGCCAGTCCTTTGACAGCAGCCTGAGTGGTTGGGTGTTCGGCGGAGGGACCAAGCTGACCGTCCTAGG	LV1-40	LJ3	QSFDSSLSGWV	11	0.600601
c28856	149812	NN	ATGGACCTCCTGCACAAGAACATGAAACACCTGTGGTTCTTCCTCCTCCTGGTGGCAGCTCCCAGATGGGTCCTGTCCCAGGTGCAGCTACAGCAGTGGGGCGCAGGACTGTTGAAGCCTTCGGAGACCCTGTCCCTCACCTGCACTGTCTATGGTGGGTCCTTCAGTGGTTACTACTGGAGTTGGATCCGCCAGCCCCCAGGGAAGGGGCTGGAGTGGATTGGGGAAATCAATCATAGTGGAAGCACCAACTACAACCCGTCCCTCAAGAGTCGAGTCACCATATTAGCAGACACGTCCAAGAACCAGTTCTCCCTGAAGCTGAGCTCTGTGACCGCCGCGGACACGGCTGTATATTACTGTGCGAGAACTTACTTTGGTTCGGGGAGTTATTTAGTC…	IGHV4-34*01	IGHD3-10*01	IGHJ6*02	ARTYFGSGSYLVLLDYYYYGMDV	23	1.42857	ATGGCCTGGCCTCCTCTCCTCCTCACTCTCCTCGCTCACTGCACAGGGTCCTGGGCCCAGTCTGTGCTGACGCAGCCGCCCTCAGTGTCTGGGGCCCCAGGGCAGAGGGTCACCATCTCCTGCACTGGGAGCAGCTCCAACATCGGGGCAGGTTATGATGTACACTGGTACCAGCAGCTTCCAGAAACAGCCCCCAAACTCCTCATCTATGGTAACAGCAATCGGCCCTCAGGGGTCCCTGACCGATTCTCTGGCTCCAAGTCTGGCACCTCAGCCTCCCTGGCCATCACTGGGCTCCAGGCTGAGGATGAGGCTGATTATTACTGCCAGTCCTTTGACAGCAGCCTGAGTGGTTGGGTGTTCGGCGGAGGGACCAAGCTGACCGTCCTAGG	LV1-40	LJ3	QSFDSSLSGWV	11	0.600601
c29078	149812	NN	ATGGACCTCCTGCACAAGAACATGAAACACCTGTGGTTCTTCCTCCTCCTGGTGGCAGCTCCCAGATGGGTCCTGTCCCAGGTGCAGCTACAGCAGTGGGGCGCAGGACTGTTGAAGCCTTCGGAGACCCTGTCCCTCACCTGCACTGTCTATGGTGGGTCCTTCAGTGGTTACTACTGGAGTTGGATCCGCCAGCCCCCAGGGAAGGGGCTGGAGTGGATTGGGGAAATCAATCATAGTGGAAGCACCAACTACAACCCGTCCCTCAAGAGTCGAGTCACCATATTAGCAGACACGTCCAAGAACCAGTTCTCCCTGAAGCTGAGCTCTGTGACCGCCGCGGACACGGCTGTATATTACTGTGCGAGAACTTACTTTGGTTCGGGGAGTTATTTAGTC…	IGHV4-34*01	IGHD3-10*01	IGHJ6*02	ARTYFGSGSYLVLLDYYYYGMDV	23	1.42857	ATGGCCTGGCCTCCTCTCCTCCTCACTCTCCTCGCTCACTGCACAGGGTCCTGGGCCCAGTCTGTGCTGACGCAGCCGCCCTCAGTGTCTGGGGCCCCAGGGCAGAGGGTCACCATCTCCTGCACTGGGAGCAGCTCCAACATCGGGGCAGGTTATGATGTACACTGGTACCAGCAGCTTCCAGAAACAGCCCCCAAACTCCTCATCTATGGTAACAGCAATCGGCCCTCAGGGGTCCCTGACCGATTCTCTGGCTCCAAGTCTGGCACCTCAGCCTCCCTGGCCATCACTGGGCTCCAGGCTGAGGATGAGGCTGATTATTACTGCCAGTCCTTTGACAGCAGCCTGAGTGGTTGGGTGTTCGGCGGAGGGACCAAGCTGACCGTCCTAGG	LV1-40	LJ3	QSFDSSLSGWV	11	0.600601
c29075	149812	NN	ATGGACCTCCTGCACAAGAACATGAAACACCTGTGGTTCTTCCTCCTCCTGGTGGCAGCTCCCAGATGGGTCCTGTCCCAGGTGCAGCTACAGCAGTGGGGCGCAGGACTGTTGAAGCCTTCGGAGACCCTGTCCCTCACCTGCACTGTCTATGGTGGGTCCTTCAGTGGTTACTACTGGAGTTGGATCCGCCAGCCCCCAGGGAAGGGGCTGGAGTGGATTGGGGAAATCAATCATAGTGGAAGCACCAACTACAACCCGTCCCTCAAGAGTCGAGTCACCATATTAGCAGACACGTCCAAGAACCAGTTCTCCCTGAAGCTGAGCTCTGTGACCGCCGCGGACACGGCTGTATATTACTGTGCGAGAACTTACTTTGGTTCGGGGAGTTATTTAGTC…	IGHV4-34*01	IGHD3-10*01	IGHJ6*02	ARTYFGSGSYLVLLDYYYYGMDV	23	1.42857	ATGGCCTGGCCTCCTCTCCTCCTCACTCTCCTCGCTCACTGCACAGGGTCCTGGGCCCAGTCTGTGCTGACGCAGCCGCCCTCAGTGTCTGGGGCCCCAGGGCAGAGGGTCACCATCTCCTGCACTGGGAGCAGCTCCAACATCGGGGCAGGTTATGATGTACACTGGTACCAGCAGCTTCCAGAAACAGCCCCCAAACTCCTCATCTATGGTAACAGCAATCGGCCCTCAGGGGTCCCTGACCGATTCTCTGGCTCCAAGTCTGGCACCTCAGCCTCCCTGGCCATCACTGGGCTCCAGGCTGAGGATGAGGCTGATTATTACTGCCAGTCCTTTGACAGCAGCCTGAGTGGTTGGGTGTTCGGCGGAGGGACCAAGCTGACCGTCCTAGG	LV1-40	LJ3	QSFDSSLSGWV	11	0.600601
c29005	149812	NN	ATGGACCTCCTGCACAAGAACATGAAACACCTGTGGTTCTTCCTCCTCCTGGTGGCAGCTCCCAGATGGGTCCTGTCCCAGGTGCAGCTACAGCAGTGGGGCGCAGGACTGTTGAAGCCTTCGGAGACCCTGTCCCTCACCTGCACTGTCTATGGTGGGTCCTTCAGTGGTTACTACTGGAGTTGGATCCGCCAGCCCCCAGGGAAGGGGCTGGAGTGGATTGGGGAAATCAATCATAGTGGAAGCACCAACTACAACCCGTCCCTCAAGAGTCGAGTCACCATATTAGCAGACACGTCCAAGAACCAGTTCTCCCTGAAGCTGAGCTCTGTGACCGCCGCGGACACGGCTGTATATTACTGTGCGAGAACTTACTTTGGTTCGGGGAGTTATTTAGTC…	IGHV4-34*01	IGHD3-10*01	IGHJ6*02	ARTYFGSGSYLVLLDYYYYGMDV	23	1.42857	ATGACCTGCTCCCCTCTCCTCCTCACCCTTCTCATTCACTGCACAGGGTCCTGGGCCCAGTCTGTGTTGACGCAGCCGCCCTCAGTGTCTGCGGCCCCAGGACAGAAGGTCACCATCTCCTGCTCTGGAAGCAGCTCCAACATTGGGAGTAATTATGTATCCTGGTACCAGCAGCTCCCAAGAACAGCCCCCAAACTCCTCATTTATGACAATAATAAGCGACCCTCAGGGATTCCTGACCGATTCTCTGGCTCCAAGTCTGGCACGTCAGCCACCCTGGGCATCACCGGACTCCAGACTGGGGACGAGGCCGATTATTACTGCGGAACATGGGATAGCAGCCTGAGTGCTGGTTGGGTGTTCGGCGGAGGGACCAAGCTGACCGTCCTAGG	LV1-51	LJ3	GTWDSSLSAGWV	12	0.600601
c29194	149812	NN	ATGGAGTTTGGCCTGAGCTGGCTTTTTCTTGTGACTATATTAGAAGGTGTCCAGTGTGAGGTGCACCTATTGCAGTCTGGGGGAGGGTTCGTACAGCCGGGGGGGTCCCTGATACTCTCCTGTGCAACCTCTGGATTCACGTTTAGCGACTACGCCATGAGCTGGGTCCGCCAGGCTCCAGGGAAGGGGCTGGAGTGGGTCTCAAGTATTAGTGTCACTGGTGACACCACATACTACGCAGACTTCGCGAGGGGCCGGTTCACCGTCTCCAGAGACAACTCCAAGAACGCGCTGTTTCTGCAAATGAACAACATGAGAGTCGAGGACACGGCCATATATTATTGTGCGAAAGACAGGGACACAAACAGCTATGGGGTCCGGTACGGTCTGGACGTCTGG…	IGHV3-23*01	IGHD5-18*01	IGHJ6*02	AKDRDTNSYGVRYGLDV	17	9.88372	ATGGCCTGGACCGTTCTCCTCCTCGGCCTCCTCTCTCACTGCACAGGGTCTGTGACCTCCTATGTGCTGACTCAGGCACCCTCAGTGTCAGTGGCCCCAGGAAAGACGGCCAGGATTACCTGTGGGGGAAGCAACATTGGAAGTAAAAGTGTGCACTGGTACCAGCAGAAGCCAGGCCAGGCCCCTATATCGGTCATCTTTTTTGATAGCGCCCGGCCCTCAGGGGTCCCTGAGCGATTGTCTGGCTCCAAGTCTGGGAACACGGCCACCCTGACCATCAGTAGGGCCGAAGCCGGGGATGAGGCCGACTACTACTGTCAGGTGTGGGATAGTAGTAGTGATAAGGGAGTGTTCGGTGGAGGGACCAAGCTGACCGTCCTGGG	LV3-21	LJ3	QVWDSSSDKGV	11	5.07937
c28729	149812	NN	ATGGAGTTTGGCCTGAGCTGGCTTTTTCTTGTGACTATATTAGAAGGTGTCCAGTGTGAGGTGCACCTATTGCAGTCTGGGGGAGGGTTCGTACAGCCGGGGGGGTCCCTGATACTCTCCTGTGCAACCTCTGGATTCACGTTTAGCGACTACGCCATGAGCTGGGTCCGCCAGGCTCCAGGGAAGGGGCTGGAGTGGGTCTCAAGTATTAGTGTCACTGGTGACACCACATACTACGCAGACTTCGCGAGGGGCCGGTTCACCGTCTCCAGAGACAACTCCAAGAACGCGCTGTTTCTGCAAATGAACAACATGAGAGTCGAGGACACGGCCATATATTATTGTGCGAAAGACAGGGACACAAACAGCTATGGGGTCCGGTACGGTCTGGACGTCTGG…	IGHV3-23*01	IGHD5-18*01	IGHJ6*02	AKDRDTNSYGVRYGLDV	17	9.88372	ATGGCCTGGACCGTTCTCCTCCTCGGCCTCCTCTCTCACTGCACAGGGTCTGTGACCTCCTATGTGCTGACTCAGGCACCCTCAGTGTCAGTGGCCCCAGGAAAGACGGCCAGGATTACCTGTGGGGGAAGCAACATTGGAAGTAAAAGTGTGCACTGGTACCAGCAGAAGCCAGGCCAGGCCCCTATATCGGTCATCTTTTTTGATAGCGCCCGGCCCTCAGGGGTCCCTGAGCGATTGTCTGGCTCCAAGTCTGGGAACACGGCCACCCTGACCATCAGTAGGGCCGAAGCCGGGGATGAGGCCGACTACTACTGTCAGGTGTGGGATAGTAGTAGTGATAAGGGAGTGTTCGGTGGAGGGACCAAGCTGACCGTCCTGGG	LV3-21	LJ3	QVWDSSSDKGV	11	5.07937
c29205	149812	NN	ATGGAGTTTGGCCTGAGCTGGCTTTTTCTTGTGACTATATTAGAAGGTGTCCAGTGTGAGGTGCACCTATTGCAGTCTGGGGGAGGGTTCGTACAGCCGGGGGGGTCCCTGATACTCTCCTGTGCAACCTCTGGATTCACGTTTAGCGACTACGCCATGAGCTGGGTCCGCCAGGCTCCAGGGAAGGGGCTGGAGTGGGTCTCAAGTATTAGTGTCACTGGTGACACCACATACTACGCAGACTTCGCGAGGGGCCGGTTCACCGTCTCCAGAGACAACTCCAAGAACGCGCTGTTTCTGCAAATGAACAACATGAGAGTCGAGGACACGGCCATATATTATTGTGCGAAAGACAGGGACACAAACAGCTATGGGGTCCGGTACGGTCTGGACGTCTGG…	IGHV3-23*01	IGHD5-18*01	IGHJ6*02	AKDRDTNSYGVRYGLDV	17	9.88372	ATGGCCTGGACCGTTCTCCTCCTCGGCCTCCTCTCTCACTGCACAGGGTCTGTGACCTCCTATGTGCTGACTCAGGCACCCTCAGTGTCAGTGGCCCCAGGAAAGACGGCCAGGATTACCTGTGGGGGAAGCAACATTGGAAGTAAAAGTGTGCACTGGTACCAGCAGAAGCCAGGCCAGGCCCCTATATCGGTCATCTTTTTTGATAGCGCCCGGCCCTCAGGGGTCCCTGAGCGATTGTCTGGCTCCAAGTCTGGGAACACGGCCACCCTGACCATCAGTAGGGCCGAAGCCGGGGATGAGGCCGACTACTACTGTCAGGTGTGGGATAGTAGTAGTGATAAGGGAGTGTTCGGTGGAGGGACCAAGCTGACCGTCCTGGG	LV3-21	LJ3	QVWDSSSDKGV	11	5.07937
c28955	149812	NN	ATGGAGTTTGGGCTGAGCTGGCTTTTTCTTGTGGCTATTTTAAAAGGTGTCCAGTGTGAGGTGCAGCTGTTGGAGTCTGGGGGAGGCTTGGTACAGCCTGGGGGGTCCCTGAGACTCTCCTGTGCAGCCTCTGGATTCACCTTTAGCAGCTATGCCATGAGCTGGGTCCGCCAGGCTCCAGGGAAGGGGCTGGAGTGGGTCTCAGCTATTAGTGGTAGTGGTGGTAGCACATACTACGCAGACTCCGTGAAGGGCCGGTTCACCATCTCCAGAGACAATTCCAAGAACACGCTGTATCTGCAAATGAACAGCCTGAGAGCCGAGGACACGGCCGTATATTACTGTGCGAAAGATTTCTGGTTAGGGTCACGTATAGCAGTGGCTGGTAGCGACTACTGG…	IGHV3-23*01	IGHD6-19*01	IGHJ4*02	AKDFWLGSRIAVAGSDY	17	0	ATGGACATGAGGGTCCCCGCTCAGCTCCTGGGGCTCCTGCTACTCTGGCTCCGAGGTGCCAGATGTGACATCCAGATGACCCAGTCTCCATCCTCCCTGTCTGCATCTGTAGGAGACAGAGTCACCATCACTTGCCGGGCAAGTCAGAGCATTAGCAGCTATTTAAATTGGTATCAGCAGAAACCAGGGAAAGCCCCTAAACTCCTGATCTATGCTGCATCCAGTTTGCAAAGTGGGGTCCCATCAAGGTTCAGTGGCAGTGGATCTGGGACAGATTTCACTCTCACCATCAGCAGTCTGCAACCTGAAGATTTTGCAACTTATTACTGTCAACAGAGTTACAGTTCCCCGCTCACTTTCGGCCCTGGGACCAAAGTGGATATCAAACG	KV1-39	KJ3	QQSYSSPLT	9	0.940439
c28772	149812	NN	ATGGAGTTTGGGCTGAGCTGGGTTTTCCTCGTTGCTCTTTTAAGAGGTGTCCAGTGTCAGGTGCAGCTGGTGGAGTCTGGGGGAGGCGTGGTCCAGCCTGGGAGGTCCCTGAGACTCTCCTGTGAAGCGTCTGGATTCACCTTCAGTAGTTATGCCATGCACTGGGTCCGCCAGGCTCCAGGCAAGGGGCTGGAGTGGGTGGCAGTTATATGGTATGATGGAAGTAATAAAAATTATGTAGCCTCCGTGAAGGGCCGATTCACCATCTCCAGAGACAATTCCAAGAACACGCTGTATCTGCAGATGGACAGCCTGAGAGCCGAGGACACGGCTGTCTACTACTGTGCGCCACAGAGATATTGTAATAAGAGCAGGTGTCCTAATTGGTTCGACCCCTGG…	IGHV3-33*01	IGHD2/OR15-2a*01	IGHJ5*02	APQRYCNKSRCPNWFDP	17	3.27381	ATGGACATGAGGGTCCCCGCTCAGCTCCTGGGGCTCCTGCTGCTCTGGCTCCCAGGTGCCAAGTGTGACATCCAGATGACCCAGACTCCTTCCACCCTGTCTGCATCTGTAGGAGACAGAGTCACCATCACTTGCCGGGCCAGTCAGAGTGTTAGTAACTGGTTGGCCTGGTATCAGCAGAAACCAGGGAAAGCCCCTAAGCTCCTGATCTCTGATGCCTCCAGTTTGGACAGTGGGGTCCCATCAAGGTTCAGCGGCAGTGGATCTGGGACAGAATTCACTCTCACCATCAGCAACCTGCAGCCTGATGATTTTGCAACTTATTACTGCCAACAGTATAATAGTTACTCTCGGACGTTTGGCCAAGGGACCAAGGTGGAAGTCAAGCG	KV1-5	KJ1	QQYNSYSRT	9	2.83019
c29145	149812	NN	ATGGAGTTTGGGCTGAGCTGGGTTTTCCTCGTTGCTCTTTTAAGAGGTGTCCAGTGTCAGGTGCAGCTGGTGGAGTCTGGGGGAGGCGTGGTCCAGCCTGGGAGGTCCCTGAGACTCTCCTGTGAAGCGTCTGGATTCACCTTCAGTAGTTATGCCATGCACTGGGTCCGCCAGGCTCCAGGCAAGGGGCTGGAGTGGGTGGCAGTTATATGGTATGATGGAAGTAATAAAAATTATGTAGCCTCCGTGAAGGGCCGATTCACCATCTCCAGAGACAATTCCAAGAACACGCTGTATCTGCAGATGGACAGCCTGAGAGCCGAGGACACGGCTGTCTACTACTGTGCGCCACAGAGATATTGTAATAAGAGCAGGTGTCCTAATTGGTTCGACCCCTGG…	IGHV3-33*01	IGHD2/OR15-2a*01	IGHJ5*02	APQRYCNKSRCPNWFDP	17	3.27381	ATGGACATGAGGGTCCCCGCTCAGCTCCTGGGGCTCCTGCTGCTCTGGCTCCCAGGTGCCAAGTGTGACATCCAGATGACCCAGACTCCTTCCACCCTGTCTGCATCTGTAGGAGACAGAGTCACCATCACTTGCCGGGCCAGTCAGAGTGTTAGTAACTGGTTGGCCTGGTATCAGCAGAAACCAGGGAAAGCCCCTAAGCTCCTGATCTCTGATGCCTCCAGTTTGGACAGTGGGGTCCCATCAAGGTTCAGCGGCAGTGGATCTGGGACAGAATTCACTCTCACCATCAGCAACCTGCAGCCTGATGATTTTGCAACTTATTACTGCCAACAGTATAATAGTTACTCTCGGACGTTTGGCCAAGGGACCAAGGTGGAAGTCAAGCG	KV1-5	KJ1	QQYNSYSRT	9	2.83019
c28780	149812	NN	ATGGGGTCAACCGCCATCCTCGCCCTCCTCCTGGCTGTTCTCCAAGGAGTCTCTGCCGAGGTGCAGCTGGTGCAGTCTGGAGCAGAGGTGAAAAAGCCGGGGGAGTCGCTGAAGATCTCCTGTAAGGGTTCTGGATACAACTTTCCCAACTTCTGGATCGGCTGGGTGCGCCAGATGCCCGGGAAAGGCCTGGAGTGGATGGGGATCATCTATCCTGGTGACTCTGATACCAGATACAGTCCGTCCTTGCAAGGCCAGGTCACCATCTCAGTCGACAAGTCCATCAGCACCGCCTACTTGCAGTGGGACCGCCTGAAGGCCTCGGACACCGCCATATATTTCTGTGCGCGCCGAGATTCGGGCGATACTGATTGGCCTCACCTTGACTACTGGGGCCAG…	IGHV5-51*03	IGHD2-21*01	IGHJ4*02	ARRDSGDTDWPHLDY	15	4.21687	ATGGACATGAGGGTCCCCGCTCAGCTCCTGGGGCTTCTGCTGCTCTGGCTCCCAGGTGCCAGATGTGCCATCCAGTTGACCCAGTCTCCATCCTCCCTGTCTGCATCTGTAGGAGACAGAGTCACCATCTCTTGCCGGGCGAGTCAGGGCATTAGCGGTGCTTTAGCCTGGTATCAGCAGAAGCCAGGGAAAGCTCCTAAGCTCCTGATCTATGATGCCTCCAGGTTGGAAAGAGGAGTCCCAGCAAGGTTCAGCGGCAGTGGATCTGGGACAGATTTCACTCTCAGCATCAGCAGCCTACAGCCTGAAGATTTTGCTACTTATTACTGTCAACACTTTAATACTTTCCTCCTCGCAACTTTCGGCGGCGGGACCAAGGTGGAGATCAAACG	KV1-13	KJ4	QHFNTFLLAT	10	4.74684
c29151	149812	NN	ATGGGGTCAACCGCCATCCTCGCCCTCCTCCTGGCTGTTCTCCAAGGAGTCTCTGCCGAGGTGCAGCTGGTGCAGTCTGGAGCAGAGGTGAAAAAGCCGGGGGAGTCGCTGAAGATCTCCTGTAAGGGTTCTGGATACAACTTTCCCAACTTCTGGATCGGCTGGGTGCGCCAGATGCCCGGGAAAGGCCTGGAGTGGATGGGGATCATCTATCCTGGTGACTCTGATACCAGATACAGTCCGTCCTTGCAAGGCCAGGTCACCATCTCAGTCGACAAGTCCATCAGCACCGCCTACTTGCAGTGGGACCGCCTGAAGGCCTCGGACACCGCCATATATTTCTGTGCGCGCCGAGATTCGGGCGATACTGATTGGCCTCACCTTGACTACTGGGGCCAG…	IGHV5-51*03	IGHD2-21*01	IGHJ4*02	ARRDSGDTDWPHLDY	15	4.21687	ATGGACATGAGGGTCCCCGCTCAGCTCCTGGGGCTTCTGCTGCTCTGGCTCCCAGGTGCCAGATGTGCCATCCAGTTGACCCAGTCTCCATCCTCCCTGTCTGCATCTGTAGGAGACAGAGTCACCATCTCTTGCCGGGCGAGTCAGGGCATTAGCGGTGCTTTAGCCTGGTATCAGCAGAAGCCAGGGAAAGCTCCTAAGCTCCTGATCTATGATGCCTCCAGGTTGGAAAGAGGAGTCCCAGCAAGGTTCAGCGGCAGTGGATCTGGGACAGATTTCACTCTCAGCATCAGCAGCCTACAGCCTGAAGATTTTGCTACTTATTACTGTCAACACTTTAATACTTTCCTCCTCGCAACTTTCGGCGGCGGGACCAAGGTGGAGATCAAACG	KV1-13	KJ4	QHFNTFLLAT	10	4.74684
c28953	149812	NN	ATGGAGTTTGGGCTGGGCTGGATTTTCCTTGGTGCGATTTTAAAAGGTGTCCAGTGTGAGGTGCAGCTGGTGGAGTCTGGGGGAGGCTTGGTGAAGCCTGGGGGGTCCCTTAGCCTCTCCTGTGTAGCCTCTGGACTCACTTTCGGTAACGCCTGGATGAGCTGGGTCCGCCAGGCTCCGGGGAAGGGGCTGGAGTGGGTTGGCCGTATTAAAAGCAGGACTGATGGTGGGACAAGAGACTACGCTGCACCCGTGAAAGGCAGATTCACCATCTCAAGAGATGATTCAAAAAACACGCTGTATCTACATATGACCGGCCTGAAAACCGAGGACACAGCCGTGTATTACTGTACCACAGCGATACCGAAATTGTGGAGTCGCTATGACTACAGTGGTAAC…	IGHV3-15*01	IGHD4-23*01	IGHJ3*02	TTAIPKLWSRYDYSGNSGGEDAFDI	25	4.58453	ATGGAAGCCCCAGCGCAGCTTCTCTTCCTCCTGCTACTCTGGCTCCCAGATACCACTGGAGAAATAGTGATGACGCAGTCTCCAGCCACCCTGTCTGTGTCTCCAGGGGGAAGAGCCACCCTCTCCTGCAGGGCCAGTCAGAGTGTTAACAGCAACTTAGCCTGGTACCAGCAGAAACCTGGCCAGGCTCCCAGGCTCCTCATTTATAGTGCAACCATCAGGGCCACTGGAATCCCAGCCCGGTTCAGTGGCAGTGGGTCTGGGACAGAGTTCACTCTCACCATCAGCAGCCTGCAGTCTGAAGATTTTGCAGTTTATTACTGTCAGCAGTATAATAAGTGGCCTCCGGAAAACACTTTTGGCCAGGGGACCAAGCTGGAGATCAAACG	KV3-15	KJ2	QQYNKWPPENT	11	2.79503
c28943	149812	NN	ATGGAGTTTGGGCTGAGCTGGCTTTTTCTTGTGGCTATTTTAAAAGGTGTCCAGTGTGAGGCGCAGTTGTTGCAGTCCGGGGGAGGCATGGTTCAGCCTGGGGGGTCCCTGAGACTCTCCTGTGCAGCCTCTGGATTCACCTTTAAGTACTATGGCATGAATTGGGTCCGCCAGACTCCAGGGAAGGGGCTGGAATGGGTCTCAAGTATTACTAGTAGTGGTGGTGACACATATTACGCAGACTCCGTGAAGGGCCGGTTCACCATCTCCAGAGACAATTCGAACAACACGGTCTATCTGCAGATGAACAGCCTGAGAGTCGAGGACATGGCCGTCTATTACTGTGCGAAAGATGTGGTCTACTGGGGCCAGGGAGCCCTGGTCACCGTCTCCTCAGC	IGHV3-23*01	IGHD2-21*01	IGHJ4*02	AKDVVY	6	9.30931	ATGGAAGCCCCAGCGCAGCTTCTCTTCCTCCTGCTACTCTGGCTCCCAGATCTTACTGGAGAAATAGTGATGACGCAGTCTCCAGCCACCCTGTCTATGTCCCCAGGGGAAAGAGCCACCCTCTCCTGCAGGGCCAGTCAAAATGTTCGGAGCAATTTAGCCTGGTATCAGCAGAAACCTGGCCAGGCTCCCAGGCTCCTCATCTATAATGCAGCCACCAGGGCCACTGGTATCCCAGCCAGGTTCAGTGGCAGTTGGTCTGGGACAGAGTTCACTCTCACCATCAGCAGCCTGCAGTCTGAAGACTTTGCAGTTTATTACTGTCACCAGTATGATGACTGGCCTCTCTGGACGTTCGGCCAAGGGACCAGGGTGGAAATCAAACG	KV3-15	KJ1	HQYDDWPLWT	10	5.2795
c29242	149812	NN	ATGGAGTTTGGGCTGAGCTGGCTTTTTCTTGTGGCTATTTTAAAAGGTGTCCAGTGTGAGGCGCAGTTGTTGCAGTCCGGGGGAGGCATGGTTCAGCCTGGGGGGTCCCTGAGACTCTCCTGTGCAGCCTCTGGATTCACCTTTAAGTACTATGGCATGAATTGGGTCCGCCAGACTCCAGGGAAGGGGCTGGAATGGGTCTCAAGTATTACTAGTAGTGGTGGTGACACATATTACGCAGACTCCGTGAAGGGCCGGTTCACCATCTCCAGAGACAATTCGAACAACACGGTCTATCTGCAGATGAACAGCCTGAGAGTCGAGGACATGGCCGTCTATTACTGTGCGAAAGATGTGGTCTACTGGGGCCAGGGAGCCCTGGTCACCGTCTCCTCAGC	IGHV3-23*01	IGHD2-21*01	IGHJ4*02	AKDVVY	6	9.30931	ATGGAAGCCCCAGCGCAGCTTCTCTTCCTCCTGCTACTCTGGCTCCCAGATCTTACTGGAGAAATAGTGATGACGCAGTCTCCAGCCACCCTGTCTATGTCCCCAGGGGAAAGAGCCACCCTCTCCTGCAGGGCCAGTCAAAATGTTCGGAGCAATTTAGCCTGGTATCAGCAGAAACCTGGCCAGGCTCCCAGGCTCCTCATCTATAATGCAGCCACCAGGGCCACTGGTATCCCAGCCAGGTTCAGTGGCAGTTGGTCTGGGACAGAGTTCACTCTCACCATCAGCAGCCTGCAGTCTGAAGACTTTGCAGTTTATTACTGTCACCAGTATGATGACTGGCCTCTCTGGACGTTCGGCCAAGGGACCAGGGTGGAAATCAAACG	KV3-15	KJ1	HQYDDWPLWT	10	5.2795
c29206	149812	NN	ATGGAGTTTGGGCTGAGCTGGCTTTTTCTTGTGGCTATTTTAAAAGGTGTCCAGTGTGAGGCGCAGTTGTTGCAGTCCGGGGGAGGCATGGTTCAGCCTGGGGGGTCCCTGAGACTCTCCTGTGCAGCCTCTGGATTCACCTTTAAGTACTATGGCATGAATTGGGTCCGCCAGACTCCAGGGAAGGGGCTGGAATGGGTCTCAAGTATTACTAGTAGTGGTGGTGACACATATTACGCAGACTCCGTGAAGGGCCGGTTCACCATCTCCAGAGACAATTCGAACAACACGGTCTATCTGCAGATGAACAGCCTGAGAGTCGAGGACATGGCCGTCTATTACTGTGCGAAAGATGTGGTCTACTGGGGCCAGGGAGCCCTGGTCACCGTCTCCTCAGC	IGHV3-23*01	IGHD2-21*01	IGHJ4*02	AKDVVY	6	9.30931	ATGGAAGCCCCAGCGCAGCTTCTCTTCCTCCTGCTACTCTGGCTCCCAGATCTTACTGGAGAAATAGTGATGACGCAGTCTCCAGCCACCCTGTCTATGTCCCCAGGGGAAAGAGCCACCCTCTCCTGCAGGGCCAGTCAAAATGTTCGGAGCAATTTAGCCTGGTATCAGCAGAAACCTGGCCAGGCTCCCAGGCTCCTCATCTATAATGCAGCCACCAGGGCCACTGGTATCCCAGCCAGGTTCAGTGGCAGTTGGTCTGGGACAGAGTTCACTCTCACCATCAGCAGCCTGCAGTCTGAAGACTTTGCAGTTTATTACTGTCACCAGTATGATGACTGGCCTCTCTGGACGTTCGGCCAAGGGACCAGGGTGGAAATCAAACG	KV3-15	KJ1	HQYDDWPLWT	10	5.2795
c28826	149812	NN	ATGGAGTTTGGGCTGAGCTGGGTTTTCCTCGTTGTTATTTTACAAGGTGTCCAGTGTGAGGTGCTGCTGGTGGAGTCTGGGGGAGGCTTGGTCCAGCCTGGAGGGTCCCTGAGACTCTCCTGTGTCGTCTCTGGATTCACCTTTAGTGACCACTCCATGGACTGGGTCCGCCAGGCTCCAGGGAAGGGGCTGGAGTGGGTTGGCCATACTAGAAACAAAGGTCAACGGTACACCACAGAATACGCCGCGTCTGTGAAAGGCAGATTCACCATCTCAAGAGATGACTCGAAGAATTCATTGTATCTGCAAATGAACAGCCTGTCAATCGCGGACACGGCCCTGTATTATTGTGTTAGGAGTGGGAGTTACTATTTTGACTCCTGGGGCCAGGGAACCCTG…	IGHV3-72*01	IGHD1-26*01	IGHJ4*02	VRSGSYYFDS	10	7.05882	ATGGACATGAGGGTCCCCGCTCAGCTCCTGGGGCTCCTGCTGCTCTGGGTCCCAGGTGCCAAATGTGACATCCACATGATCCAGTCTCCTTCCACCCTGTCTGCATCTGTAGGAGACAGAGTCACCATCACTTGCCGGGCCAGTGAAACTATTAGTATTTGGTTGGCCTGGTATCAGCAGAAACCAGGGAAAGCCCCTAAACTCCTGATCTATGATGCCTCCAGTTTGGAAAGTGGGGTCCCATCAAGGTTCTCGGGCAGTGGATCTGGGACAGAATTCACTCTCACCATCAGCAGCCTGCAGCCTGATGATTTTGCAACTTTTTACTGCCAACAATACAATGATTTTCCGTGGACGTTCGGCCAAGGGACCAAGGTGGAAATCAAACG	KV1-5	KJ1	QQYNDFPWT	9	4.47284
c29204	149812	NN	ATGGAGTTTGGGCTGAGCTGGGTTTTCCTCGTTGTTATTTTACAAGGTGTCCAGTGTGAGGTGCTGCTGGTGGAGTCTGGGGGAGGCTTGGTCCAGCCTGGAGGGTCCCTGAGACTCTCCTGTGTCGTCTCTGGATTCACCTTTAGTGACCACTCCATGGACTGGGTCCGCCAGGCTCCAGGGAAGGGGCTGGAGTGGGTTGGCCATACTAGAAACAAAGGTCAACGGTACACCACAGAATACGCCGCGTCTGTGAAAGGCAGATTCACCATCTCAAGAGATGACTCGAAGAATTCATTGTATCTGCAAATGAACAGCCTGTCAATCGCGGACACGGCCCTGTATTATTGTGTTAGGAGTGGGAGTTACTATTTTGACTCCTGGGGCCAGGGAACCCTG…	IGHV3-72*01	IGHD1-26*01	IGHJ4*02	VRSGSYYFDS	10	7.05882	ATGGACATGAGGGTCCCCGCTCAGCTCCTGGGGCTCCTGCTGCTCTGGGTCCCAGGTGCCAAATGTGACATCCACATGATCCAGTCTCCTTCCACCCTGTCTGCATCTGTAGGAGACAGAGTCACCATCACTTGCCGGGCCAGTGAAACTATTAGTATTTGGTTGGCCTGGTATCAGCAGAAACCAGGGAAAGCCCCTAAACTCCTGATCTATGATGCCTCCAGTTTGGAAAGTGGGGTCCCATCAAGGTTCTCGGGCAGTGGATCTGGGACAGAATTCACTCTCACCATCAGCAGCCTGCAGCCTGATGATTTTGCAACTTTTTACTGCCAACAATACAATGATTTTCCGTGGACGTTCGGCCAAGGGACCAAGGTGGAAATCAAACG	KV1-5	KJ1	QQYNDFPWT	9	4.47284
c28939	149812	NN	ATGGAGTTTGGGCTGAGCTGGGTTTTCCTCGTTGTTATTTTACAAGGTGTCCAGTGTGAGGTGCTGCTGGTGGAGTCTGGGGGAGGCTTGGTCCAGCCTGGAGGGTCCCTGAGACTCTCCTGTGTCGTCTCTGGATTCACCTTTAGTGACCACTCCATGGACTGGGTCCGCCAGGCTCCAGGGAAGGGGCTGGAGTGGGTTGGCCATACTAGAAACAAAGGTCAACGGTACACCACAGAATACGCCGCGTCTGTGAAAGGCAGATTCACCATCTCAAGAGATGACTCGAAGAATTCATTGTATCTGCAAATGAACAGCCTGTCAATCGCGGACACGGCCCTGTATTATTGTGTTAGGAGTGGGAGTTACTATTTTGACTCCTGGGGCCAGGGAACCCTG…	IGHV3-72*01	IGHD1-26*01	IGHJ4*02	VRSGSYYFDS	10	7.05882	ATGGACATGAGGGTCCCCGCTCAGCTCCTGGGGCTCCTGCTGCTCTGGGTCCCAGGTGCCAAATGTGACATCCACATGATCCAGTCTCCTTCCACCCTGTCTGCATCTGTAGGAGACAGAGTCACCATCACTTGCCGGGCCAGTGAAACTATTAGTATTTGGTTGGCCTGGTATCAGCAGAAACCAGGGAAAGCCCCTAAACTCCTGATCTATGATGCCTCCAGTTTGGAAAGTGGGGTCCCATCAAGGTTCTCGGGCAGTGGATCTGGGACAGAATTCACTCTCACCATCAGCAGCCTGCAGCCTGATGATTTTGCAACTTTTTACTGCCAACAATACAATGATTTTCCGTGGACGTTCGGCCAAGGGACCAAGGTGGAAATCAAACG	KV1-5	KJ1	QQYNDFPWT	9	4.47284
c29177	149812	NN	ATGGAGTTTGGGCTGAGCTGGGTTTTCCTCGTTGTTATTTTACAAGGTGTCCAGTGTGAGGTGCTGCTGGTGGAGTCTGGGGGAGGCTTGGTCCAGCCTGGAGGGTCCCTGAGACTCTCCTGTGTCGTCTCTGGATTCACCTTTAGTGACCACTCCATGGACTGGGTCCGCCAGGCTCCAGGGAAGGGGCTGGAGTGGGTTGGCCATACTAGAAACAAAGGTCAACGGTACACCACAGAATACGCCGCGTCTGTGAAAGGCAGATTCACCATCTCAAGAGATGACTCGAAGAATTCATTGTATCTGCAAATGAACAGCCTGTCAATCGCGGACACGGCCCTGTATTATTGTGTTAGGAGTGGGAGTTACTATTTTGACTCCTGGGGCCAGGGAACCCTG…	IGHV3-72*01	IGHD1-26*01	IGHJ4*02	VRSGSYYFDS	10	7.05882	ATGGACATGAGGGTCCCCGCTCAGCTCCTGGGGCTCCTGCTGCTCTGGGTCCCAGGTGCCAAATGTGACATCCACATGATCCAGTCTCCTTCCACCCTGTCTGCATCTGTAGGAGACAGAGTCACCATCACTTGCCGGGCCAGTGAAACTATTAGTATTTGGTTGGCCTGGTATCAGCAGAAACCAGGGAAAGCCCCTAAACTCCTGATCTATGATGCCTCCAGTTTGGAAAGTGGGGTCCCATCAAGGTTCTCGGGCAGTGGATCTGGGACAGAATTCACTCTCACCATCAGCAGCCTGCAGCCTGATGATTTTGCAACTTTTTACTGCCAACAATACAATGATTTTCCGTGGACGTTCGGCCAAGGGACCAAGGTGGAAATCAAACG	KV1-5	KJ1	QQYNDFPWT	9	4.47284
c29069	149812	NN	ATGGAGTTTGGGCTGAGCTGGGTTTTCCTCGTTGTTATTTTACAAGGTGTCCAGTGTGAGGTGCTGCTGGTGGAGTCTGGGGGAGGCTTGGTCCAGCCTGGAGGGTCCCTGAGACTCTCCTGTGTCGTCTCTGGATTCACCTTTAGTGACCACTCCATGGACTGGGTCCGCCAGGCTCCAGGGAAGGGGCTGGAGTGGGTTGGCCATACTAGAAACAAAGGTCAACGGTACACCACAGAATACGCCGCGTCTGTGAAAGGCAGATTCACCATCTCAAGAGATGACTCGAAGAATTCATTGTATCTGCAAATGAACAGCCTGTCAATCGCGGACACGGCCCTGTATTATTGTGTTAGGAGTGGGAGTTACTATTTTGACTCCTGGGGCCAGGGAACCCTG…	IGHV3-72*01	IGHD1-26*01	IGHJ4*02	VRSGSYYFDS	10	7.05882	ATGGACATGAGGGTCCCCGCTCAGCTCCTGGGGCTCCTGCTGCTCTGGGTCCCAGGTGCCAAATGTGACATCCACATGATCCAGTCTCCTTCCACCCTGTCTGCATCTGTAGGAGACAGAGTCACCATCACTTGCCGGGCCAGTGAAACTATTAGTATTTGGTTGGCCTGGTATCAGCAGAAACCAGGGAAAGCCCCTAAACTCCTGATCTATGATGCCTCCAGTTTGGAAAGTGGGGTCCCATCAAGGTTCTCGGGCAGTGGATCTGGGACAGAATTCACTCTCACCATCAGCAGCCTGCAGCCTGATGATTTTGCAACTTTTTACTGCCAACAATACAATGATTTTCCGTGGACGTTCGGCCAAGGGACCAAGGTGGAAATCAAACG	KV1-5	KJ1	QQYNDFPWT	9	4.47284
c29120	149812	NN	ATGGAATTGGGGCTGAGCTGGGTTTTCCTTGTTGCTATTTTAGAAGGTGTCCAGTGTGAGGTGCAGGTGGTGGAGTCTGGGGGAGGCTTGGTCCACCCTGGGGAGTCCCTGAGACTCTCCTGTGCAGTCTCTGGATACACCTTTAGTTGCTGTTTGATGAGCTGGGTCCGCCAGGTCCCAGGGAAGGGGCTGGAGTGGGTGGCCAATATAAACTCAGATGGCAGTCAGAAATACTATGCGGACTCTGCGAAGGGCCGATTCACCATCTCCAGAGACAACACCAAGAACTCACTGTTTCTGCAAATGAACAGCCTGAGGCCCGAGGACACGGGTCTGTATTACTGTGCGAGGTGGAACTACGCATATGACTACTGGGGCCAGGGAACCCCGGTCACCGTC…	IGHV3-7*01	IGHD1-7*01	IGHJ4*02	ARWNYAYDY	9	7.20721	ATGGAAACCCCAGCGCAGCTTCTCTTCCTCCTGCTACTCTGGCTCCCAGATACCACCGGAGAAATTGTGTTGACGCAGTCTCCAGGCACCCTGTCTTTGTCTCCAGGGGAAAGAGCCACACTCTCCTGCAGGGCCAGTCAGATTATTAGCAACAACTACTTAGCCTGGTACCAGCAGAAACCTGGCCAGGCTCCCAGGGTCCTCATCTATGGTGCATCCAGCAGGGTCTCTGGCATCCCAGACAGGTTCCGTGGCAGTGGGTCTGGGACAGACTTCACTCTCACCATCAGTAGACTGGAGCCTGAAGATTTTGCAGTGTATTACTGTCAGAAGTATGGTGGCTCACCGTGGACGTTCGGCCAAGGGACCAAGGTGGAAATCAAACG	KV3-20	KJ1	QKYGGSPWT	9	3.7037
c28929	149812	NN	ATGGATCTCATGTGCAGGAAAATGAAGCACCTGTGGTTCTTCCTCCTGCTGGTGGCGGCTCCCAGATGGGTCCTGTCCCAGCTGCAGATGCAGGAGTCGGGCCCAGGACTGGTGAAGCCTTCGGAGACCCTGTCCCTCACCTGCACTGTATCTGGAGGCTCCATCAGGAGTAGTACTCACTACTGGGCCTGGATCCGCCAGCCCCCAGGGAAGGGTCTGGAGTGGGTCGGCAGTATCTTTTATATTGGGAACACCGACTACAACACGTCCCTCAAGAGTCGAGTCACCATTTCCGCAGACACATCGAAGAACCAGTTCTCCCTGACGCTGAACTCTGTGACCGCCGCAGACACGGCTATTTATTACTGTGCGAGACAGACTGTTGGATATTGTAGTGGC…	IGHV4-39*01	IGHD2-15*01	IGHJ5*02	ARQTVGYCSGGSCYEYVNWFDP	22	7.4928	ATGGACATGAGGGTCCCCGCTCAGCTCCTGGGGCTCCTGCTGCTCTGGTTCCCAGGTTCCAGATGCGACATCCAGATGACGCAGTCTCCGTCTTCCGTGTCTTCATCTGTAGGAGACAGAGTCATTATCACTTGTCGGGCGAGTCAGGGTATTAGTAGCTGGATAGCCTGGTATCAGCAGAAACCAGGGAAAGCCCCTCAGCTCCTGATCAATGCTGCATCCAGGTTGCAAAGTGGGGTCCCATCAAGGTTCAGCGCCAGTGGATCTGGGACAGATTTCACTCTCACCATCAGCAGCCTGCAGCCTGAGGACTTTGCAACTTATTATTGTCAACGGGCTGAGAGTTTCCCCGCGCTCACTTTCGGCGGGGGGACCAAGGTGGAGATCAAACG	KV1-12	KJ4	QRAESFPALT	10	5.60748
c28964	149812	NN	ATCATGGAGTTCTGGCTGAGCTGGGTTCTCCTTGTTGCCATTTTAAAAGATGTCCAGTGTGAGGTGCAACTGGTGCAGTCTGGGGGAGGCTTGGTCCAGCCGGGGGGGTCCCTGAGACTCTCCTGTTCAGCCTCTGGATTCCCCTTCAGTAACTATGCTCTGCACTGGGTCCGCCAGGCTCCAGGGAAGGGACTGGAACATGTTTCAGCTGTTAGTAGTAATGGGGATATCACAAACTACGCAAACTCCGTGAAGGGCAGATTCACCATCTCCAGAGACAATTTCAAGAACACGCTGCATCTTCAAGTGAGCAGTCTGAGACCTGAGGACACGGCTGTGTATTACTGTGTGAAAGATTGGAACTACGGTGGTAACTCCACAACCCCACTTTTTGACCAC…	IGHV3-64D*06	IGHD4-23*01	IGHJ4*02	VKDWNYGGNSTTPLFDH	17	5.37313	ATGGCCTGGACCGTTCTCCTCCTCGGCCTCCTCTCTCACTGCACAGGCTCTGTGACCTCCTATGTGCTGACTCAGCCACCCTCAGTGTCAGTGGCCCCAGGAAAGACGGCCAGGATCACCTGTGGGGGAAACAACATTGGAAGTAAAAGTGTGCAGTGGTACCAGCAGAGGCCAGGCCAGGCCCCTGTGCTGGTCATCTATTTGGATAGCGACCGGCCCTCAGGGATCCCTGAGCGATTCTCTGGCTCCAACTCTGGCAACACGGCCACCCTGACCATCAGCAGGGTCGAAGCCGGGGATGAGGCCGACTATTACTGTCAGGTGTGGGATAGTAGTAGTGATCCCTATGCTGTGTTCGGAGGAGGCACCCAGCTGACCGTCCTCGG	LV3-21	LJ7	QVWDSSSDPYAV	12	1.54799
c28867	149812	NN	ATCATGGAGTTCTGGCTGAGCTGGGTTCTCCTTGTTGCCATTTTAAAAGATGTCCAGTGTGAGGTGCAACTGGTGCAGTCTGGGGGAGGCTTGGTCCAGCCGGGGGGGTCCCTGAGACTCTCCTGTTCAGCCTCTGGATTCCCCTTCAGTAACTATGCTCTGCACTGGGTCCGCCAGGCTCCAGGGAAGGGACTGGAACATGTTTCAGCTGTTAGTAGTAATGGGGATATCACAAACTACGCAAACTCCGTGAAGGGCAGATTCACCATCTCCAGAGACAATTTCAAGAACACGCTGCATCTTCAAGTGAGCAGTCTGAGACCTGAGGACACGGCTGTGTATTACTGTGTGAAAGATTGGAACTACGGTGGTAACTCCACAACCCCACTTTTTGACCAC…	IGHV3-64D*06	IGHD4-23*01	IGHJ4*02	VKDWNYGGNSTTPLFDH	17	5.37313	ATGGCCTGGACCGTTCTCCTCCTCGGCCTCCTCTCTCACTGCACAGGCTCTGTGACCTCCTATGTGCTGACTCAGCCACCCTCAGTGTCAGTGGCCCCAGGAAAGACGGCCAGGATCACCTGTGGGGGAAACAACATTGGAAGTAAAAGTGTGCAGTGGTACCAGCAGAGGCCAGGCCAGGCCCCTGTGCTGGTCATCTATTTGGATAGCGACCGGCCCTCAGGGATCCCTGAGCGATTCTCTGGCTCCAACTCTGGCAACACGGCCACCCTGACCATCAGCAGGGTCGAAGCCGGGGATGAGGCCGACTATTACTGTCAGGTGTGGGATAGTAGTAGTGATCCCTATGCTGTGTTCGGAGGAGGCACCCAGCTGACCGTCCTCGG	LV3-21	LJ7	QVWDSSSDPYAV	12	1.54799
c29153	149812	NN	ATGGGGTCAACCGCCATCCTCGCCCTCCTCCTGGCTGTTCTCCAAGGAGTCTGTGCCGAGGTGCAGCTGGAGCAGTCTGGAGCAGAGGTGAAAAAGCCGGGGGAGTCTCTGAAGATCTCCTGTAAGGCTTCTGGATACAGGTTTACGGCCTACTGGATCGGCTGGGTGCGCCAGATGCCCGGAAAAGGCCTGGAGTGGATGGGGATCATCTATCCTGGTGACTCTAATACCAAATACAGCCCGTCCTTCCAAGGCCAGGTCACCATCTCAGCCGACAAGTCCATCAGCACCGCCTACCTGCAGTGGGGCGCCCTGAGGGCCTCGGACACCGCCGTATATTACTGTGTGAGACAGCAGAACCCTTACGATTATTGGAGTGGTTATTCTTATTACTACTAC…	IGHV5-51*01	IGHD3-3*01	IGHJ6*02	VRQQNPYDYWSGYSYYYYNFPMDV	24	6.42458	ATGGTGTTGCAGGCCCAGGTCTTCATTTCTCTGTTGCTCTGGATCTCTGGTGCCTACGGGGACATCGTAATGACCCAGTCTCCAGACTCCGTGGCTGTGTCTCTGGGCGAGAGGGCCACCATCAACTGCAAGTCCAGCCAGAGTGTGTTATCCACCTCCAACAACAAGAACTACTTGGCTTGGTACCAGCAGAAAGCAGGACAGCCTCCTAAATTGCTCATTTACTGGGCATCTACCCGGGAATCCGGGGTCCCTGACCGATTCAGTGGCAGCGGGTCTGGGACAGATTTCACTCTCACCATCAGCAGCCTGCAGGCTGAAGATGTGGCAGTTTATTACTGTCACCAGTATTATACTTCTCCCTGGACGTTCGGCCAAGGGACCAAGGTGGAAATCAAA…	KV4-1	KJ1	HQYYTSPWT	9	4.14201
c28839	149812	NN	ATGGGGTCAACCGCCATCCTCGCCCTCCTCCTGGCTGTTCTCCAAGGAGTCTGTGCCGAGGTGCAGCTGGAGCAGTCTGGAGCAGAGGTGAAAAAGCCGGGGGAGTCTCTGAAGATCTCCTGTAAGGCTTCTGGATACAGGTTTACGGCCTACTGGATCGGCTGGGTGCGCCAGATGCCCGGAAAAGGCCTGGAGTGGATGGGGATCATCTATCCTGGTGACTCTAATACCAAATACAGCCCGTCCTTCCAAGGCCAGGTCACCATCTCAGCCGACAAGTCCATCAGCACCGCCTACCTGCAGTGGGGCGCCCTGAGGGCCTCGGACACCGCCGTATATTACTGTGTGAGACAGCAGAACCCTTACGATTATTGGAGTGGTTATTCTTATTACTACTAC…	IGHV5-51*01	IGHD3-3*01	IGHJ6*02	VRQQNPYDYWSGYSYYYYNFPMDV	24	6.42458	ATGGTGTTGCAGGCCCAGGTCTTCATTTCTCTGTTGCTCTGGATCTCTGGTGCCTACGGGGACATCGTAATGACCCAGTCTCCAGACTCCGTGGCTGTGTCTCTGGGCGAGAGGGCCACCATCAACTGCAAGTCCAGCCAGAGTGTGTTATCCACCTCCAACAACAAGAACTACTTGGCTTGGTACCAGCAGAAAGCAGGACAGCCTCCTAAATTGCTCATTTACTGGGCATCTACCCGGGAATCCGGGGTCCCTGACCGATTCAGTGGCAGCGGGTCTGGGACAGATTTCACTCTCACCATCAGCAGCCTGCAGGCTGAAGATGTGGCAGTTTATTACTGTCACCAGTATTATACTTCTCCCTGGACGTTCGGCCAAGGGACCAAGGTGGAAATCAAA…	KV4-1	KJ1	HQYYTSPWT	9	4.14201
c29064	149812	NN	ATGGACTGGACCTGGAGCATCCTTTTCTTGGTGGCAGCAGCAACAGGTGCCCACTCCCAGGTTCAGCTGGTGCAGTCTGGAGCTGAGGTGAAGAAGCCTGGGGCCTCAGTGAAGGTCTCCTGCAAGGCTTCTGGTTACACCTTTACCACCTATGGTCTCAGCTGGGTGCGACAGGCCCCTGGACAAGGGCTTGAGTGGATGGGATGGATCAGCACTTACAATTCTAACACAAACTATGCACAGAAGCTCCAGGGCAGAGTCACCATGACCACAGACACATCCACGAGCACAGCCTACATGGAGCTGAGGAGCCTGAGATCTGACGACACGGCCGTCTATTACTGTGCGAGAGATCGGGGCGTAGAGGTTGACTACTGGGGCCAGGGAACCCTGGTCACC…	IGHV1-18*01	IGHD3-10*01	IGHJ4*02	ARDRGVEVDY	10	1.78042	ATGGCTTGGACCCCACTCCTCTTCCTCACCCTCCTCCTCCACTGCACAGGGTCTCTCTCCCAGCTTGTGCTGACTCAATCGCCCTCTGCCTCTGCCTCCCTGGGAGCCTCGGTCAAACTCACCTGCACTCTGAGCAGTGGGCACAGCACCTACGCCGTCGCATGGCATCAGCAGCAGCCAGAGAAGGGCCCTCGGTTCTTGATGAAGCTTAACAGTGATGGCAGCCACAGGAAGGGGGACGGGATCCCTGATCGCTTCTCAGGCTCCAGCTCTGGGGCTGAGCGCTACCTCACCATCTCCAGCCTCCAGTCTGAAGATGAGGCTGACTATTATTGTCAGGCCTGGGGCACTGGAGGGGTCTTCGGCGGAGGGACCAAGCTGACCGTCCTAGG	LV4-69	LJ3	QAWGTGGV	8	2.7439
c28905	149812	NN	ATGAGACATCTGTGGTTCTTCCTTCTCCTGGTGGCAGCTCCCAGATGGGTCCTGTCCCAGGTGCAGCTGCAGGAGTCGGGCCCAGGACTGGTGAAGCCTTCGGAGACCCTGGTTCTCCGTTGCGATGTCTCTGGAGACTCCATGACCAGTGGCTACTGGAGCTGGATCCGGCAGTCCCCAGGACAGCCACTGGAATGGGTTGGCTACATCTATCACAATGGCAGAACTCTCTATAATCCGTCCCTCAAGAGTCGAGTCACCATTTCCATAGACACGTCCACGGACCAGTTCTCCCTGAGGCTGACCGCAGTGAACGCCGCAGACACGGCCGTCTATTTTTGTGCGAGACAACACTTGGTTACGGTGGGCGCCAGAATTTTCATTTCATACTTTGACTTC…	IGHV4-59*08	IGHD4-23*01	IGHJ4*02	ARQHLVTVGARIFISYFDF	19	15.6805	ATGGCCTGGACCGTTCTCCTCCTCGGCCTCCTCTCTCACTGCACAGGCTCTGTGACCTCCTATGTGGTGACTCAGTCACCCTCGGTGTCAGTGGCCCCAGGACAGACGGCCCGGATGACCTGTGGGGGAAACAACATTAAAAGTAATGCAGTCCACTGGTACCGGCAGAGGCCAGGCCAGGCCCCTGTGTTGGTCGTCTGTGATGGTTGCAACCGGCCTTCGGGGATCCCTGAGCGATTCTCGGTCTCCAAGTCTGGGAACATGGCCACCCTGACTATCAATAGGGTCGGAGCCGGGGACGAGGCCGACTATGTTTGTCAGGTTTGGGATATTGCTAGTAAAAGTCTGGTCTTCGGCGGCGGGACCAGCCTGACCGTCCTCGG	LV3-21	LJ2	QVWDIASKSLV	11	12.7389
c29002	149812	NN	ATGAGACATCTGTGGTTCTTCCTTCTCCTGGTGGCAGCTCCCAGATGGGTCCTGTCCCAGGTGCAGCTGCAGGAGTCGGGCCCAGGACTGGTGAAGCCTTCGGAGACCCTGGTTCTCCGTTGCGATGTCTCTGGAGACTCCATGACCAGTGGCTACTGGAGCTGGATCCGGCAGTCCCCAGGACAGCCACTGGAATGGGTTGGCTACATCTATCACAATGGCAGAACTCTCTATAATCCGTCCCTCAAGAGTCGAGTCACCATTTCCATAGACACGTCCACGGACCAGTTCTCCCTGAGGCTGACCTCAGTGAACGCCGCAGACACGGCCGTCTATTTTTGTGCGAGACAACACTTGGTTACGGTGGGCGCCAGAATTTTCATTTCATACTTTGACTTC…	IGHV4-59*08	IGHD4-23*01	IGHJ4*02	ARQHLVTVGARIFISYFDF	19	15.3846	ATGGCCTGGACCGTTCTCCTCCTCGGCCTCCTCTCTCACTGCACAGGCTCTGTGACCTCCTATGTGGTGACTCAGTCACCCTCGGTGTCAGTGGCCCCAGGACAGACGGCCCGGATGACCTGTGGGGGAAACAACATTAAAAGTAATGCAGTCCACTGGTACCGGCAGAGGCCAGGCCAGGCCCCTGTGTTGGTCGTCTGTGATGGTTGCAACCGGCCTTCGGGGATCCCTGAGCGATTCTCGGTCTCCAAGTCTGGGAACATGGCCACCCTGACTATCAATAGGGTCGGAGCCGGGGACGAGGCCGACTATGTTTGTCAGGTTTGGGATATTGCTAGTAAAAGTCTGGTCTTCGGCGGCGGGACCAGCCTGACCGTCCTCGG	LV3-21	LJ2	QVWDIASKSLV	11	12.7389
c29196	149812	NN	ATGGAGTTTGGGCTGAGCTGGGTTTTCCTCGTTGCTCTTTTAAGAGGTGTCCAGTGTCAAGTGCAGCTGGTGGAGTCTGGGGGAGGCGTGGTCCAGCCTGGGAAGTCCCTGAGACTCTCCTGTGCAGCCTTTAGATTCACCTTCAGTAACTATGCCATGCACTGGGTCCGCCAGGCTCCAGGCAAGGGGCTGGAGTGGGTGGCAGTTATATCCTATGATGGAAATACGAAATACTATGCAGACTCCGTGAAGGGCCGATTCACCATCTCCAGAGACAATGCCAAGAACACGCTGTATCTGCAAATGAACAGCCTGAGAGTTGAGGACACGGCTGTGTATTACTGTACGGAGGGTCGTGGCTGGGCCACCTGGGGCCAGGGAACCCTGGTCACCGTCTCC…	IGHV3-30*03	IGHD6-19*01	IGHJ5*02	TEGRGWAT	8	3.98773	ATGAGGCTCCCTGCTCAGCTCCTGGGGCTGCTAATGCTCTGGGTCCCAGGATCTAGTGGGGATGTTGTGCTGACTCAGTCTCCACTCTCCCTGCCCGTCACCCTTGGACAGCCGGCCTCCATCTCCTGCAGGTCTAGTCAAAGCCTCGTACATAGTGATGGAAACACCTACTTGAATTGGTTTCACCTGAGGCCAGGCCAATCTCCAAGGCGCCTAATTTATAAGGTTTCTAACCGGGACTCTGGGGTCCCAGACAGATTCAGCGGCGCTGGGTCAGGCACTGATTTCACACTGAAGATCAACAGGGTGGAGGCAGAGGATGTTGGGATTTATTATTGCATGCAGGGTACACACGTGATCACCTTCGGCCAAGGGACACGACTGGAGATTAAAGG	KV2-30	KJ5	MQGTHVIT	8	3.62538
c29039	149812	NN	ATGGAGTTTGGGCTGAGCTGGCTTTTTCTTGTGGCTATTTTAAAAGGTGTCCAGTGTGAGGTGCAGCTGTTGGAGTCTGGGGGAGGCTTGGTACAGCCTGGGGGGTCCCTGAGACTCTCCTGTGCAGCCTCTGGATTCACCTTTAGCAGCTATGCCATGAGCTGGGTCCGCCAGGCTCCAGGGAAGGGGCTGGAGTGGGTCTCAACTATTAGTGGTAGTGGTGGTAGCACATACTACGCAGACTCCGTGAAGGGCCGGTTCACCATCTCCAGAGACAATTCCAAGAACACGCTGTATCTGCAAATGAACAGCCTGAGAGCCGAGGACACGGCCGTATATTACTGTGCGAAAGTTAGAATCCCGTTCGTAGTACCAGCTGCTATGGGCTACTGGGGCCAG…	IGHV3-23*01	IGHD2-2*01	IGHJ4*02	AKVRIPFVVPAAMGY	15	0.301205	ATGGTGTTGCAGACCCAGGTCTTCATTTCTCTGTTGCTCTGGATCTCTGGTGCCTACGGGGACATCGTGATGACCCAGTCTCCAGACTCCCTGGCTGTGTCTCTGGGCGAGAGGGCCACCATCAACTGCAAGTCCAGCCAGAGTGTTTTATACAGCTCCAACAATAAGAACTACTTAGCTTGGTACCAGCAGAAACCAGGACAGCCTCCTAAGCTGCTCATTTACTGGGCATCTACCCGGGAATCCGGGGTCCCTGACCGATTCAGTGGCAGCGGGTCTGGGACAGATTTCACTCTCACCATCAGCAGCCTGCAGGCTGAAGATGTGGCAGTTTATTACTGTCAGCAATATTATAGTACTCCGCTCACTTTCGGCGGAGGGACCAAGGTGGAGATCAAA…	KV4-1	KJ4	QQYYSTPLT	9	0
c28651	149812	NN	ATGGAGTTTGGGCTGAGCTGGCTTTTTCTTGTGGCTATTTTAAAAGGTGTCCAGTGTGAGGTGCAGCTGTTGGAGTCTGGGGGAGGCTTGGTACAGCCTGGGGGGTCCCTGAGACTCTCCTGTGCAGCCTCTGGATTCACCTTTAGCAGCTATGCCATGAGCTGGGTCCGCCAGGCTCCAGGGAAGGGGCTGGAGTGGGTCTCAACTATTAGTGGTAGTGGTGGTAGCACATACTACGCAGACTCCGTGAAGGGCCGGTTCACCATCTCCAGAGACAATTCCAAGAACACGCTGTATCTGCAAATGAACAGCCTGAGAGCCGAGGACACGGCCGTATATTACTGTGCGAAAGTTAGAATCCCGTTCGTAGTACCAGCTGCTATGGGCTACTGGGGCCAG…	IGHV3-23*01	IGHD2-2*01	IGHJ4*02	AKVRIPFVVPAAMGY	15	0.301205	ATGGTGTTGCAGACCCAGGTCTTCATTTCTCTGTTGCTCTGGATCTCTGGTGCCTACGGGGACATCGTGATGACCCAGTCTCCAGACTCCCTGGCTGTGTCTCTGGGCGAGAGGGCCACCATCAACTGCAAGTCCAGCCAGAGTGTTTTATACAGCTCCAACAATAAGAACTACTTAGCTTGGTACCAGCAGAAACCAGGACAGCCTCCTAAGCTGCTCATTTACTGGGCATCTACCCGGGAATCCGGGGTCCCTGACCGATTCAGTGGCAGCGGGTCTGGGACAGATTTCACTCTCACCATCAGCAGCCTGCAGGCTGAAGATGTGGCAGTTTATTACTGTCAGCAATATTATAGTACTCCGCTCACTTTCGGCGGAGGGACCAAGGTGGAGATCAAA…	KV4-1	KJ4	QQYYSTPLT	9	0
c28901	149812	NN	ATGGAGTTTGGGCTGAGCTGGCTTTTTCTTGTGGCTATTTTAAAAGGTGTCCAGTGTGAGGTGCAGCTGTTGGAGTCTGGGGGAGGCTTGGTACAGCCTGGGGGGTCCCTGAGACTCTCCTGTGCAGCCTCTGGATTCACCTTTAGCAGCTATGCCATGAGCTGGGTCCGCCAGGCTCCAGGGAAGGGGCTGGAGTGGGTCTCAACTATTAGTGGTAGTGGTGGTAGCACATACTACGCAGACTCCGTGAAGGGCCGGTTCACCATCTCCAGAGACAATTCCAAGAACACGCTGTATCTGCAAATGAACAGCCTGAGAGCCGAGGACACGGCCGTATATTACTGTGCGAAAGTTAGAATCCCGTTCGTAGTACCAGCTGCTATGGGCTACTGGGGCCAG…	IGHV3-23*01	IGHD2-2*01	IGHJ4*02	AKVRIPFVVPAAMGY	15	0.301205	ATGGTGTTGCAGACCCAGGTCTTCATTTCTCTGTTGCTCTGGATCTCTGGTGCCTACGGGGACATCGTGATGACCCAGTCTCCAGACTCCCTGGCTGTGTCTCTGGGCGAGAGGGCCACCATCAACTGCAAGTCCAGCCAGAGTGTTTTATACAGCTCCAACAATAAGAACTACTTAGCTTGGTACCAGCAGAAACCAGGACAGCCTCCTAAGCTGCTCATTTACTGGGCATCTACCCGGGAATCCGGGGTCCCTGACCGATTCAGTGGCAGCGGGTCTGGGACAGATTTCACTCTCACCATCAGCAGCCTGCAGGCTGAAGATGTGGCAGTTTATTACTGTCAGCAATATTATAGTACTCCGCTCACTTTCGGCGGAGGGACCAAGGTGGAGATCAAA…	KV4-1	KJ4	QQYYSTPLT	9	0
c28924	149812	NN	ATGGAGTTTGGGCTGAGCTGGCTTTTTCTTGTGGCTATTTTAAAAGGTGTCCAGTGTGAGGTGCAGCTGTTGGAGTCTGGGGGAGCCTTGGTACAGCCTGGGGGGTCCCAGAGACTCTCCTGTGCAGCCTCTGGATTCAGCTTTAGCACCTATGTCATGAGCTGGGTCCGCCAGGCTCCAGGGAAGGGGCTGGAGTGGGTCTCATCTATTAGTGCTAGTAGTGTTAGCACATATCATGCAGACTCCGTGAAGGGCCGGTTCACCATCTCCAGAGACAATTCCAAGAGCACGCTGTATCTGCAAATGAACAGCCTGAGAGCCGAGGACACGGCCGTGTATTACTGTGCGAAAGGTTACGGTTCTTGTGGTAGTAGTGGGTGCTATGAAAAGCCCGTGCAT…	IGHV3-23*01	IGHD3-10*01	IGHJ6*02	AKGYGSCGSSGCYEKPVHGSGSAYGMDV	28	4.06977	ATGGCCGGCTTCCCTCTCCTCCTCACCCTCCTCACTCACTGTGCAGGGTCCTGGGCCCAGTCTGTGCTGACTCAGCCACCCTCAGCGTCTGGGACCCCCGGGCAGAGGGTCACCATCTCTTGTTCTGGAAGCAGCTCCAACATCGGAAATAATTATGTATACTGGTACCAGCAGCTCCCAGGAACGGCCCCCAAACTCCTCATCTATAGGAGTGATCAGCGGCCCTCAGGGGTCCCTGACCGATTCTCTGGCTCCAAGTCTGGCACCTCAGCCTCCCTGGCCATCAGTGGGCTCCGGTCCGAGGATGAGGCTGATTATTATTGTGCAGCATGGGATGACAGCCTGCGTGGTTTGGTATTCGGCGGAGGGACCAAGTTGACCGTCCTAGG	LV1-47	LJ2	AAWDDSLRGLV	11	1.82371
c28895	149812	NN	ATGGAGTTTGGGCTGAGCTGGCTTTTTCTTGTGGCTATTTTAAAAGGTGTCCAGTGTGAGGTGCAGCTGTTGGAGTCTGGGGGAGCCTTGGTACAGCCTGGGGGGTCCCAGAGACTCTCCTGTGCAGCCTCTGGATTCAGCTTTAGCACCTATGTCATGAGCTGGGTCCGCCAGGCTCCAGGGAAGGGGCTGGAGTGGGTCTCATCTATTAGTGCTAGTAGTGTTAGCACATATCATGCAGACTCCGTGAAGGGCCGGTTCACCATCTCCAGAGACAATTCCAAGAGCACGCTGTATCTGCAAATGAACAGCCTGAGAGCCGAGGACACGGCCGTGTATTACTGTGCGAAAGGTTACGGTTCTTGTGGTAGTAGTGGGTGCTATGAAAAGCCCGTGCAT…	IGHV3-23*01	IGHD3-10*01	IGHJ6*02	AKGYGSCGSSGCYEKPVHGSGSAYGMDV	28	4.06977	ATGGCCGGCTTCCCTCTCCTCCTCACCCTCCTCACTCACTGTGCAGGGTCCTGGGCCCAGTCTGTGCTGACTCAGCCACCCTCAGCGTCTGGGACCCCCGGGCAGAGGGTCACCATCTCTTGTTCTGGAAGCAGCTCCAACATCGGAAATAATTATGTATACTGGTACCAGCAGCTCCCAGGAACGGCCCCCAAACTCCTCATCTATAGGAGTGATCAGCGGCCCTCAGGGGTCCCTGACCGATTCTCTGGCTCCAAGTCTGGCACCTCAGCCTCCCTGGCCATCAGTGGGCTCCGGTCCGAGGATGAGGCTGATTATTATTGTGCAGCATGGGATGACAGCCTGCGTGGTTTGGTATTCGGCGGAGGGACCAAGTTGACCGTCCTAGG	LV1-47	LJ2	AAWDDSLRGLV	11	1.82371
c29077	149812	NN	ATGGAACTGGGGCTCCGCTGGGTTTTCCTTGTTGCTATTTTAGAAGGTGTCCAGTGTGAGGTGCAGCTGGTGGAGTCTGGGGGAGGCCTGGTCAAGCCTGGGGGGTCCCTGAGACTCTCCTGTGCAGCCTCTGGATTCACCTTCAGTATCTATAGCATCAACTGGGTCCGCCAGGCTCCAGGGAAGGGGCTGGAGTGGGTCTCATCCATTAGTGGTAGTAGTGGTTACATATACTACGCAGACTCAGTGAAGGGCCGATTCACCATCTCCAGAGACAACGCCAAGAACTCACTGTATCTGCAAATGAACAGCCTGAGAGCCGAGGACACGGCTGTGTATTACTGTGCGAGAGAGGGATATACTGGCTACGATTACATGCGCGGTGGTAACGGGGCTGAC…	IGHV3-21*01	IGHD5-12*01	IGHJ4*02	AREGYTGYDYMRGGNGADY	19	1.19048	ATGGACATGAGGGTCCCCGCTCAGCTCCTGGGGCTCCTGCTGCTCTGGTTCCCAGGTGCCAGGTGTGACATCCAGATGACCCAGTCTCCATCCTCCCTGTCTGCATCTGTAGGAGACAGAGTCACCATCACTTGCCGGGCAAGTCAGGGCATTAGAAATGATTTAGGCTGGTATCAGCAGAAACCAGGGAAAGCCCCTAAGCGCCTGATCTATGCTGCATCCAGTTTGCAAAGTGGGGTCCCATCAAGGTTCAGCGGCAGTGGATCTGGGACAGAATTCACTCTCACAATCAGCAGCCTGCAGCCTGAAGATTTTGCAACTTATTACTGTCTACAGTATAATAGTTACCCTCAGACGTTCGGCCAAGGGACCAAGGTGGAGATCAAACG	KV1-17	KJ1	LQYNSYPQT	9	0.625
c28962	149812	NN	ATGGAACTGGGGCTCCGCTGGGTTTTCCTTGTTGCTATTTTAGAAGGTGTCCAGTGTGAGGTGCAGCTGGTGGAGTCTGGGGGAGGCCTGGTCAAGCCTGGGGGGTCCCTGAGACTCTCCTGTGCAGCCTCTGGATTCACCTTCAGTATCTATAGCATCAACTGGGTCCGCCAGGCTCCAGGGAAGGGGCTGGAGTGGGTCTCATCCATTAGTGGTAGTAGTGGTTACATATACTACGCAGACTCAGTGAAGGGCCGATTCACCATCTCCAGAGACAACGCCAAGAACTCACTGTATCTGCAAATGAACAGCCTGAGAGCCGAGGACACGGCTGTGTATTACTGTGCGAGAGAGGGATATACTGGCTACGATTACATGCGCGGTGGTAACGGGGCTGAC…	IGHV3-21*01	IGHD5-12*01	IGHJ4*02	AREGYTGYDYMRGGNGADY	19	1.19048	GATGGAGACTGTGACATCCAGATGACCCAGTCTCCATCCTCCCTGTCTGCATCTGTAGGAGACAGAGTCACCATCACTTGCCGGGCAAGTCAGGGCATTAGAAATGATTTAGGCTGGTATCAGCAGAAACCAGGGAAAGCCCCTAAGCGCCTGATCTATGCTGCATCCAGTTTGCAAAGTGGGGTCCCATCAAGGTTCAGCGGCAGTGGATCTGGGACAGAATTCACTCTCACAATCAGCAGCCTGCAGCCTGAAGATTTTGCAACTTATTACTGTCTACAGTATAATAGTTACCCTCAGACGTTCGGCCAAGGGACCAAGGTGGAGATCAAACG	KV1-17	KJ1	LQYNSYPQT	9	0.625
c28866	149812	NN	ATGGACTGGACCTGGAGGATCCTCTTCTTGGTGGCAGCAGCCACAGGAGCCCACTCCCAAATGCAACTGGTGCAGTCTGGGGCTGACGTGAAGAAGCCTGGAGCCTCAGTGAAACTCTCCTGCAAGGCTTCTGGATACACCTTCACCGGCTACTATATCCACTGGGTGCGACAGGCCCCTGGACACGGGCTTGAGTGGATGGGACGGATCAACCCTGACAGTGGTGGCACAACCTATGCACAGAAGTTTCAGGGCAGGGTCACCATGACCAGGGACACGTCCATCAGCACAGCCTACATGGAGCTGAGGAGACTAAGATCTGACGACACGGCCATTTACTACTGTGCGCGATTGGTTGTGCCGCAGTTCTGGGGCCAGGGAAGCCTGGTCACCGTCTCC…	IGHV1-2*06	IGHD2-21*01	IGHJ4*02	ARLVVPQF	8	5.24691	ATGACCTGCTCCCCTCTCCTCCTCACCCTTCTCATTCACTGCACAGGGTCCTGGGCCCACTCTGTATTGACGCAGCCGCCCTCAGTGTCTGCGGCCCCAGGACAGAAGGTCACCATCTCCTGCTCTGGAAGCAGCTCCGACATTGGGAATAATTATGTTTCCTGGTACCAGCAGTTCCCAGGAACAGCCCCCAAACTCCTCATTTATGACGATAGTCAGCGACCCTCAGGGATTCCTGACCGCTTCTCTGGCTCCAAATCTGGCACGTCAGCCACCCTGGGCATCAGCGGACTCCAGACTGGGGACGAGGCCGATTATTACTGCGGAACATGGGATAGCAGCCTGAGTGCTTGGGTTTTCGGCGGAGGGACCAGCCTGACCGTCCTAGG	LV1-51	LJ3	GTWDSSLSAWV	11	4.24242
c28650	149812	NN	ATGGAACTGGGGCTCCGCTGGGTTTTCCTTGTTGCTATTTTAGAAGGTGTCGAGTGTGAGGTGCTGCTTGAGGAGTCTGGGGGAGGCCTGGTCAAGCCTGGGGGGTCCCTGAGACTCTCCTGTATGGTCTCTGGGTTCAGCTTCAGCAGACATGGCATGAACTGGGTCCGCCAGGTTCCAGGGCAGGGGCTGCAGTGGGTCTCATCAATTAGTAGTCAGACAAATTATATCTACTACGCAGACTCAGTGAAGGGCCGGTTCACCATCTCCAGAGACAATACCAGGAACTCACTGTATCTGCAAATGAACAGCCTGAGAGCCGAGGACACGGCCGTCTATTACTGTGCAGCGTCGCGCGGGGGAATCAATTCCTTTGACTACTGGGGCCTGGGAACCCTA…	IGHV3-21*04	IGHD3-16*01	IGHJ4*02	AASRGGINSFDY	12	9.90991	ATGGCCTGGACCGTTCTCCTCCTCGGCCTCCTCTGTCACTGCACAGGCTCTGTGGCCTCCTATGCTCTGACTCAGCCACCCTCGCTGTCAGTGGCCCCAGGACAGACGGCCACGATTACCTGTGGACAAAATAATATTGGAACAAAAATTGTCCATTGGTACCAGCAGAAGTCAGGCCAGGCCCCTGTGGTGGTCGTCTATGATGATACGGACCGGCCCTCAGGGATCCCTGAGCGATTCTCTGGCTCCAACTCTGGGAGCACGGCCGCCCTGACCATCAGTAGGGTCGAAGCCGGGGATCAGGCCGACTACTATTGTCAGGTGTGGGATAGTGATAGTGATCATTGGGTTTTCGGCGGAGGGACGAAGCTGACCGTCCTAGG	LV3-21	LJ3	QVWDSDSDHWV	11	8.64198
c28853	149812	NN	ATGGAACTGGGGCTCCGCTGGGTTTTCCTTGTTGCTATTTTAGAAGGTGTCGAGTGTGAGGTGCTGCTTGAGGAGTCTGGGGGAGGCCTGGTCAAGCCTGGGGGGTCCCTGAGACTCTCCTGTATGGTCTCTGGGTTCAGCTTCAGCAGACATGGCATGAACTGGGTCCGCCAGGTTCCAGGGCAGGGGCTGCAGTGGGTCTCATCAATTAGTAGTCAGACAAATTATATCTACTACGCAGACTCAGTGAAGGGCCGGTTCACCATCTCCAGAGACAATACCAGGAACTCACTGTATCTGCAAATGAACAGCCTGAGAGCCGAGGACACGGCCGTCTATTACTGTGCAGCGTCGCGCGGGGGAATCAATTCCTTTGACTACTGGGGCCTGGGAACCCTA…	IGHV3-21*04	IGHD3-16*01	IGHJ4*02	AASRGGINSFDY	12	9.90991	ATGGCCTGGACCGTTCTCCTCCTCGGCCTCCTCTGTCACTGCACAGGCTCTGTGGCCTCCTATGCTCTGACTCAGCCACCCTCGCTGTCAGTGGCCCCAGGACAGACGGCCACGATTACCTGTGGACAAAATAATATTGGAACAAAAATTGTCCATTGGTACCAGCAGAAGTCAGGCCAGGCCCCTGTGGTGGTCGTCTATGATGATACGGACCGGCCCTCAGGGATCCCTGAGCGATTCTCTGGCTCCAACTCTGGGAGCACGGCCGCCCTGACCATCAGTAGGGTCGAAGCCGGGGATCAGGCCGACTACTATTGTCAGGTGTGGGATAGTGATAGTGATCATTGGGTTTTCGGCGGAGGGACGAAGCTGACCGTCCTAGG	LV3-21	LJ3	QVWDSDSDHWV	11	8.64198
c29022	149812	NN	CTGGACCTCCTGCACAAGAACATGAAACACCTGTGGTTCTTCCTCCTCCTGGTGGCAGCTCCCAGATGGGTCCTGTCTCAGGTGCAGCTGCAGGAGTCGGGCCCAGGACTGGTGAAGCCTTCGGGGACCCTGTCCCTCACCTGCGCTGTCTCTGGTGGCTCCATCAGCAATATTAACTGGTGGAGTTGGGTCCGCCAGCCCCCAGGGAAGGGGCTGGAGTGGATTGGAGAAATCTATCAGAGTGGGAGCACCAACTACAACCCGTCCCTCAAGAGTCGAGTCACCATATCAGTAGACAAGTCCAAGAACCAGTTCTCCCTGAAGCTGAGCTCTGTGACCGCCGCGGACACGGCCGTGTATTATTGTGTGGGCACAGTGGCTGACTTCCGGTACTTCGAT…	IGHV4-4*02	IGHD6-19*01	IGHJ2*01	VGTVADFRYFDL	12	1.4881	ATGGACATGAGGGTCCCCGCTCAGCTCCTGGGGCTCCTGCTACTCTGGCTCCGAGGTGCCAGATGTGACATCCAGATGACCCAGTCTCCATCCTCCCTGTCTGCATCTGTAGGAGACAGAGTCACCATCACTTGCCGGGCAAGTCAGAGCATTACCATCTATTTAAATTGGTATCAGCAGAACCCAGGGAAAGCCCCTAAGCTCCTGATCTATGCTGCATCCAATTTGCAAAGTGGGGTCCCATCAAGGTTCAGTGGCAGTGGATCTGGGACAGATTTCACTCTCACCATCAGCAGTCTGCAACCTGAAGACTTTGCGACTTACTACTGTCAACAGAGTTACAGTACCCCGCGGACGTTCGGCCAAGGGACCAAGGTGGAAATCAAACG	KV1-39	KJ1	QQSYSTPRT	9	1.88088
c31915	201441	NN	ATGGACTGGACCTGGAGGTTCCTCTTTGTGGTGGCAGCAGCTACAGGTGTCCAGTCCCAGGTCCAGCTGGTGCAGTCCGGGGCTGAGGTGAAGAGGCCTGGATCCTCGGTGAAGGTCTCCTGCAAGGCCTCTGGAGGCTCCTTCAGCTATTACACTATTAGTTGGCTGCGACAGGCCCCTGGACAAGGGCTTGAGTGGATGGGCGCGATCATCCCCATCTTTGCTACAACAAACTACGCAGAGCGGTTCCAGAACAGAGTCACGATGACCGCGGACCTATCCACGGGCATAGTTTACATGGACCTGAGCAGCCTGAGATCTGACGACACGGCCGTCTATTATTGTGCGAAGAATGGACCGGGCCAGTCGGAGGAATCGCTTGACTACGGAGACTACGAA…	IGHV1-69*12	IGHD4-17*01	IGHJ5*02	AKNGPGQSEESLDYGDYERIVPNWFDP	27	10.6509	ATGGAAACCCCAGCGCAGCTTCTCTTCCTCCTGCTACTCTGGCTCCCAGATACCACCGGAGAAATTGCTTTGACGCAGTCTCCAGGCACCCTGTCTTTGTCTCCAGGGGAAAGAGCCACCCTCTCCTGCAGGGCCAGTCAGATTGTTACCAGCAACCATTTAGCCTGGTACCAGCAGAAACCTGGCCAGGCTCCCAGGCTCCTCATCTATGCTACATCCACCCGGGCCGCTGGCATCCCCGACAGGTTCAGTGGCAGTGGGTCTGGGACAGACTTCACTCTCACCATCAGCAGACTGGAGCCTGAAGATTTTGCAGTGTATTACTGTCAACAGTATGGTAGTTCGCCAGAGACGTTCGGCCAAGGGACCAAGGTGGACATCAAACG	KV3-20	KJ1	QQYGSSPET	9	5.29595
c31903	201441	NN	ATGGACTGGACCTGGAGGTTCCTCTTTGTGGTGGCAGCAGCTACAGGTGTCCAGTCCCAGGTCCAGCTGGTGCAGTCCGGGGCTGAGGTGAAGAGGCCTGGATCCTCGGTGAAGGTCTCCTGCAAGGCCTCTGGAGGCTCCTTCAGCTATTACACTATTAGTTGGCTGCGACAGGCCCCTGGACAAGGGCTTGAGTGGATGGGCGCGATCATCCCCATCTTTGCTACAACAAACTACGCAGAGCGGTTCCAGAACAGAGTCACGATGACCGCGGACCTATCCACGGGCATAGTTTACATGGACCTGAGCAGCCTGAGATCTGACGACACGGCCGTCTATTATTGTGCGAAGAATGGACCGGGCCAGTCGGAGGAATCGCTTGACTACGGAGACTACGAA…	IGHV1-69*12	IGHD4-17*01	IGHJ5*02	AKNGPGQSEESLDYGDYERIVPNWFDP	27	10.6509	ATGGAAACCCCAGCGCAGCTTCTCTTCCTCCTGCTACTCTGGCTCCCAGATACCACCGGAGAAATTGCTTTGACGCAGTCTCCAGGCACCCTGTCTTTGTCTCCAGGGGAAAGAGCCACCCTCTCCTGCAGGGCCAGTCAGATTGTTACCAGCAACCATTTAGCCTGGTACCAGCAGAAACCTGGCCAGGCTCCCAGGCTCCTCATCTATGCTACATCCACCCGGGCCGCTGGCATCCCCGACAGGTTCAGTGGCAGTGGGTCTGGGACAGACTTCACTCTCACCATCAGCAGACTGGAGCCTGAAGATTTTGCAGTGTATTACTGTCAACAGTATGGTAGTTCGCCAGAGACGTTCGGCCAAGGGACCAAGGTGGACATCAAACG	KV3-20	KJ1	QQYGSSPET	9	5.29595
c31925	201441	NN	ATGGACTGGACCTGGAGGTTCCTCTTTGTGGTGGCAGCAGCTACAGGTGTCCAGTCCCAGGTCCAGCTGGTGCAGTCCGGGGCTGAGGTGAAGAGGCCTGGATCCTCGGTGAAGGTCTCCTGCAAGGCCTCTGGAGGCTCCTTCAGCTATTACACTATTAGTTGGCTGCGACAGGCCCCTGGACAAGGGCTTGAGTGGATGGGCGCGATCATCCCCATCTTTGCTACAACAAACTACGCAGAGCGGTTCCAGAACAGAGTCACGATGACCGCGGACCTATCCACGGGCATAGTTTACATGGACCTGAGCAGCCTGAGATCTGACGACACGGCCGTCTATTATTGTGCGAAGAATGGACCGGGCCAGTCGGAGGAATCGCTTGACTACGGAGACTACGAA…	IGHV1-69*12	IGHD4-17*01	IGHJ5*02	AKNGPGQSEESLDYGDYERIVPNWFDP	27	10.6509	ATGGAAACCCCAGCGCAGCTTCTCTTCCTCCTGCTACTCTGGCTCCCAGATACCACCGGAGAAATTGCTTTGACGCAGTCTCCAGGCACCCTGTCTTTGTCTCCAGGGGAAAGAGCCACCCTCTCCTGCAGGGCCAGTCAGATTGTTACCAGCAACCATTTAGCCTGGTACCAGCAGAAACCTGGCCAGGCTCCCAGGCTCCTCATCTATGCTACATCCACCCGGGCCGCTGGCATCCCCGACAGGTTCAGTGGCAGTGGGTCTGGGACAGACTTCACTCTCACCATCAGCAGACTGGAGCCTGAAGATTTTGCAGTGTATTACTGTCAACAGTATGGTAGTTCGCCAGAGACGTTCGGCCAAGGGACCAAGGTGGACATCAAACG	KV3-20	KJ1	QQYGSSPET	9	5.29595
c31872	201441	NN	ATGGACTGGACCTGGAGGTTCCTCTTTGTGGTGGCAGCAGCTACAGGTGTCCAGTCCCAGGGCCAACTGGTGCAGTCTGGGGCTGAGGTGAAGAAGCCTGGGTCCTCGGTGAGGGTCTCCTGCACGGCTTCTGGAGGCGTCTTCATCACCTATGCTTTCAGCTGGGTGCGGCAGGCCCCTGGACAAGGCCTTGAGTGGATGGGAGGGATCATCCCTATCTTTGGTCCAGCAAGTTATGCACCGAAGTTTCAGGGCAGAGTCAACATAATCGCGGACGAATCCACGAGTACATCGTTCATGGAGCTTTCCAGCCTGAGATCGGACGACACGGCCATCTATTACTGTGCGAGAGGGCAGCTGGATCCCGATGAATACACTGATTACTCTCCCTCGCATTAC…	IGHV1-69*12	IGHD6-13*01	IGHJ6*04	ARGQLDPDEYTDYSPSHYSSSYYLDV	26	9.52381	ATGGAAACCCCAGCGCAGCTTCTCTTCCTCCTGCTACTCTGGCTCCCAGATACCACCGGAGAAATTGTGTTGACGCAGTCTCCAGGCACCCTGTCTTTGTCTCCAGGGGAAAGAGCCACCCTCTCTTGCAGGGCCAGTCACACTATTAGCAGCAACTCCTTAGCCTGGTACCAGCAGAAACCTGGCCAGACTCCCAGGCTCCTCATCTACGGTGCTGCCACCAGGGCCACTGGCATCCCAGACAAATTCAGTGGCAGTGGGTCTGGGACAGACTTCACTCTCACCATCAGTAGACTGGAGCCTGAAGATTTTGCCGTGTATTACTGCCAGCAGTATGGTAGCTCAGTGGGGACCTTCGGCGGAGGGACCAAGGTGGAGATCAAACG	KV3-20	KJ4	QQYGSSVGT	9	5.07937
c31907	201441	NN	ATGGAGTTTGGGCTGAGCTGGGTTTTCCTTGTTGCTATTATACAAGGTGTCCAGTGTCTGGTGCAGCTGGTGGAGTCTGGGGGAGGCTTGGTCGAGCCTGGAGGGTCCCTGAGACTCTCCTGTGCAGCCTCTGGATTCAGCTTCAGTGACTACGACATGACCTGGATGCGCCAGGCTCCAGGGAAGGGGCTGGAGTGGGTTTCATATATTAGAAGTACTGGTAGTGCCATATACTACTCAGACTCTGTGAAGGGCCGATTCACCATCTCCAGGGACAACGCCAAGAACTCACTGTCTCTGCAAATGAACAGCCTGAGAGCCGAGGACACGGCTGTCTATTTCTGTGCGAGAGGTAGTAGCATCTGGTTCCCCAACGAATACTTCCAACACTGGGGCCAG…	IGHV3-11*04	IGHD2-2*01	IGHJ1*01	ARGSSIWFPNEYFQH	15	4.10557	ATGGCCTGGACCGTTCTCCTCCTCGGCCTCCTGTCTCATTGCACAGGCTCTGTGACCTCCTATGTGTTGACTCAGCCACCCTCGGTGTCAGTGGCCCCAGGAAAAACGGCCAGCATTTCCTGTGGGGGAAACAACATCGGAGGTAAAAGTGTCCACTGGTACCAACAGAAGCCAGGCCAGGCCCCTGCATTGGTCCTCTATGATAATAGCGACCGGCCCACAGGGATCCCTGAGCGATTCTCTGGCTCCAACTCTGGGAACACGGCCACCCTGACCATCAGCAGGGTCGAAGCCGGGGATGAGGCCGACTATTACTGTCAGGTGTTGGATAATAATAGTGTTTCATTTGGCGGAGGGACCAAGCTGACCGTCCTAGG	LV3-21	LJ2	QVLDNNSVS	9	5.48387
c31864	201441	NN	ATGGAGTTTGGGCTGAGCTGGGTTTTCCTTGTTGCTATTATACAAGGTGTCCAGTGTCTGGTGCAGCTGGTGGAGTCTGGGGGAGGCTTGGTCGAGCCTGGAGGGTCCCTGAGACTCTCCTGTGCAGCCTCTGGATTCAGCTTCAGTGACTACGACATGACCTGGATGCGCCAGGCTCCAGGGAAGGGGCTGGAGTGGGTTTCATATATTAGAAGTACTGGTAGTGCCATATACTACTCAGACTCTGTGAAGGGCCGATTCACCATCTCCAGGGACAACGCCAAGAACTCACTGTCTCTGCAAATGAACAGCCTGAGAGCCGAGGACACGGCTGTCTATTTCTGTGCGAGAGGTAGTAGCATCTGGTTCCCCAACGAATACTTCCAACACTGGGGCCAG…	IGHV3-11*04	IGHD2-2*01	IGHJ1*01	ARGSSIWFPNEYFQH	15	4.10557	ATGGCCTGGACCGTTCTCCTCCTCGGCCTCCTGTCTCATTGCACAGGCTCTGTGACCTCCTATGTGTTGACTCAGCCACCCTCGGTGTCAGTGGCCCCAGGAAAAACGGCCAGCATTTCCTGTGGGGGAAACAACATCGGAGGTAAAAGTGTCCACTGGTACCAACAGAAGCCAGGCCAGGCCCCTGCATTGGTCCTCTATGATAATAGCGACCGGCCCACAGGGATCCCTGAGCGATTCTCTGGCTCCAACTCTGGGAACACGGCCACCCTGACCATCAGCAGGGTCGAAGCCGGGGATGAGGCCGACTATTACTGTCAGGTGTTGGATAATAATAGTGTTTCATTTGGCGGAGGGACCAAGCTGACCGTCCTAGG	LV3-21	LJ2	QVLDNNSVS	9	5.48387
c31924	201441	NN	ATGGAGTTTGGGCTGAGCTGGGTTTTCCTTGTTGCTATTATACAAGGTGTCCAGTGTCTGGTGCAGCTGGTGGAGTCTGGGGGAGGCTTGGTCGAGCCTGGAGGGTCCCTGAGACTCTCCTGTGCAGCCTCTGGATTCAGCTTCAGTGACTACGACATGACCTGGATGCGCCAGGCTCCAGGGAAGGGGCTGGAGTGGGTTTCATATATTAGAAGTACTGGTAGTGCCATATACTACTCAGACTCTGTGAAGGGCCGATTCACCATCTCCAGGGACAACGCCAAGAACTCACTGTCTCTGCAAATGAACAGCCTGAGAGCCGAGGACACGGCTGTCTATTTCTGTGCGAGAGGTAGTAGCATCTGGTTCCCCAACGAATACTTCCAACACTGGGGCCAG…	IGHV3-11*04	IGHD2-2*01	IGHJ1*01	ARGSSIWFPNEYFQH	15	4.10557	ATGGCCTGGACCGTTCTCCTCCTCGGCCTCCTGTCTCATTGCACAGGCTCTGTGACCTCCTATGTGTTGACTCAGCCACCCTCGGTGTCAGTGGCCCCAGGAAAAACGGCCAGCATTTCCTGTGGGGGAAACAACATCGGAGGTAAAAGTGTCCACTGGTACCAACAGAAGCCAGGCCAGGCCCCTGCATTGGTCCTCTATGATAATAGCGACCGGCCCACAGGGATCCCTGAGCGATTCTCTGGCTCCAACTCTGGGAACACGGCCACCCTGACCATCAGCAGGGTCGAAGCCGGGGATGAGGCCGACTATTACTGTCAGGTGTTGGATAATAATAGTGTTTCATTTGGCGGAGGGACCAAGCTGACCGTCCTAGG	LV3-21	LJ2	QVLDNNSVS	9	5.48387
c31905	201441	NN	ATGGAGTTTGGGCTGAGCTGGGTTTTCCTTGTTGCTATTATACAAGGTGTCCAGTGTCTGGTGCAGCTGGTGGAGTCTGGGGGAGGCTTGGTCGAGCCTGGAGGGTCCCTGAGACTCTCCTGTGCAGCCTCTGGATTCAGCTTCAGTGACTACGACATGACCTGGATGCGCCAGGCTCCAGGGAAGGGGCTGGAGTGGGTTTCATATATTAGAAGTACTGGTAGTGCCATATACTACTCAGACTCTGTGAAGGGCCGATTCACCATCTCCAGGGACAACGCCAAGAACTCACTGTCTCTGCAAATGAACAGCCTGAGAGCCGAGGACACGGCTGTCTATTTCTGTGCGAGAGGTAGTAGCATCTGGTTCCCCAACGAATACTTCCAACACTGGGGCCAG…	IGHV3-11*04	IGHD2-2*01	IGHJ1*01	ARGSSIWFPNEYFQH	15	4.10557	ATGGCCTGGACCGTTCTCCTCCTCGGCCTCCTGTCTCATTGCACAGGCTCTGTGACCTCCTATGTGTTGACTCAGCCACCCTCGGTGTCAGTGGCCCCAGGAAAAACGGCCAGCATTTCCTGTGGGGGAAACAACATCGGAGGTAAAAGTGTCCACTGGTACCAACAGAAGCCAGGCCAGGCCCCTGCATTGGTCCTCTATGATAATAGCGACCGGCCCACAGGGATCCCTGAGCGATTCTCTGGCTCCAACTCTGGGAACACGGCCACCCTGACCATCAGCAGGGTCGAAGCCGGGGATGAGGCCGACTATTACTGTCAGGTGTTGGATAATAATAGTGTTTCATTTGGCGGAGGGACCAAGCTGACCGTCCTAGG	LV3-21	LJ2	QVLDNNSVS	9	5.48387
c31893	201441	NN	ATGGAGTTTGGGCTGAGCTGGGTTTTCCTTGTTGCTATTATACAAGGTGTCCAGTGTCTGGTGCAGCTGGTGGAGTCTGGGGGAGGCTTGGTCGAGCCTGGAGGGTCCCTGAGACTCTCCTGTGCAGCCTCTGGATTCAGCTTCAGTGACTACGACATGACCTGGATGCGCCAGGCTCCAGGGAAGGGGCTGGAGTGGGTTTCATATATTAGAAGTACTGGTAGTGCCATATACTACTCAGACTCTGTGAAGGGCCGATTCACCATCTCCAGGGACAACGCCAAGAACTCACTGTCTCTGCAAATGAACAGCCTGAGAGCCGAGGACACGGCTGTCTATTTCTGTGCGAGAGGTAGTAGCATCTGGTTCCCCAACGAATACTTCCAACACTGGGGCCAG…	IGHV3-11*04	IGHD2-2*01	IGHJ1*01	ARGSSIWFPNEYFQH	15	4.10557	ATGGCCTGGACCGTTCTCCTCCTCGGCCTCCTGTCTCATTGCACAGGCTCTGTGACCTCCTATGTGTTGACTCAGCCACCCTCGGTGTCAGTGGCCCCAGGAAAAACGGCCAGCATTTCCTGTGGGGGAAACAACATCGGAGGTAAAAGTGTCCACTGGTACCAACAGAAGCCAGGCCAGGCCCCTGCATTGGTCCTCTATGATAATAGCGACCGGCCCACAGGGATCCCTGAGCGATTCTCTGGCTCCAACTCTGGGAACACGGCCACCCTGACCATCAGCAGGGTCGAAGCCGGGGATGAGGCCGACTATTACTGTCAGGTGTTGGATAATAATAGTGTTTCATTTGGCGGAGGGACCAAGCTGACCGTCCTAGG	LV3-21	LJ2	QVLDNNSVS	9	5.48387
c31879	201441	NN	ATGGAGTTTGGGCTGAGCTGGGTTTTCCTTGTTGCTATTATACAAGGTGTCCAGTGTCTGGTGCAGCTGGTGGAGTCTGGGGGAGGCTTGGTCGAGCCTGGAGGGTCCCTGAGACTCTCCTGTGCAGCCTCTGGATTCAGCTTCAGTGACTACGACATGACCTGGATGCGCCAGGCTCCAGGGAAGGGGCTGGAGTGGGTTTCATATATTAGAAGTACTGGTAGTGCCATATACTACTCAGACTCTGTGAAGGGCCGATTCACCATCTCCAGGGACAACGCCAAGAACTCACTGTCTCTGCAAATGAACAGCCTGAGAGCCGAGGACACGGCTGTCTATTTCTGTGCGAGAGGTAGTAGCATCTGGTTCCCCAACGAATACTTCCAACACTGGGGCCAG…	IGHV3-11*04	IGHD2-2*01	IGHJ1*01	ARGSSIWFPNEYFQH	15	4.10557	ATGGCCTGGACCGTTCTCCTCCTCGGCCTCCTGTCTCATTGCACAGGCTCTGTGACCTCCTATGTGTTGACTCAGCCACCCTCGGTGTCAGTGGCCCCAGGAAAAACGGCCAGCATTTCCTGTGGGGGAAACAACATCGGAGGTAAAAGTGTCCACTGGTACCAACAGAAGCCAGGCCAGGCCCCTGCATTGGTCCTCTATGATAATAGCGACCGGCCCACAGGGATCCCTGAGCGATTCTCTGGCTCCAACTCTGGGAACACGGCCACCCTGACCATCAGCAGGGTCGAAGCCGGGGATGAGGCCGACTATTACTGTCAGGTGTTGGATAATAATAGTGTTTCATTTGGCGGAGGGACCAAGCTGACCGTCCTAGG	LV3-21	LJ2	QVLDNNSVS	9	5.48387
c31911	201441	NN	ATGGAGTTTGGGCTGAGCTGGGTTTTCCTTGTTGCTATTATACAAGGTGTCCAGTGTCTGGTGCAGCTGGTGGAGTCTGGGGGAGGCTTGGTCGAGCCTGGAGGGTCCCTGAGACTCTCCTGTGCAGCCTCTGGATTCAGCTTCAGTGACTACGACATGACCTGGATGCGCCAGGCTCCAGGGAAGGGGCTGGAGTGGGTTTCATATATTAGAAGTACTGGTAGTGCCATATACTACTCAGACTCTGTGAAGGGCCGATTCACCATCTCCAGGGACAACGCCAAGAACTCACTGTCTCTGCAAATGAACAGCCTGAGAGCCGAGGACACGGCTGTCTATTTCTGTGCGAGAGGTAGTAGCATCTGGTTCCCCAACGAATACTTCCAACACTGGGGCCAG…	IGHV3-11*04	IGHD2-2*01	IGHJ1*01	ARGSSIWFPNEYFQH	15	4.10557	ATGGCCTGGACCGTTCTCCTCCTCGGCCTCCTGTCTCATTGCACAGGCTCTGTGACCTCCTATGTGTTGACTCAGCCACCCTCGGTGTCAGTGGCCCCAGGAAAAACGGCCAGCATTTCCTGTGGGGGAAACAACATCGGAGGTAAAAGTGTCCACTGGTACCAACAGAAGCCAGGCCAGGCCCCTGCATTGGTCCTCTATGATAATAGCGACCGGCCCACAGGGATCCCTGAGCGATTCTCTGGCTCCAACTCTGGGAACACGGCCACCCTGACCATCAGCAGGGTCGAAGCCGGGGATGAGGCCGACTATTACTGTCAGGTGTTGGATAATAATAGTGTTTCATTTGGCGGAGGGACCAAGCTGACCGTCCTAGG	LV3-21	LJ2	QVLDNNSVS	9	5.48387
c31922	201441	NN	ATGGAGTTTGGGCTGAGCTGGGTTTTCCTTGTTGCTATTATACAAGGTGTCCAGTGTCTGGTGCAGCTGGTGGAGTCTGGGGGAGGCTTGGTCGAGCCTGGAGGGTCCCTGAGACTCTCCTGTGCAGCCTCTGGATTCAGCTTCAGTGACTACGACATGACCTGGATGCGCCAGGCTCCAGGGAAGGGGCTGGAGTGGGTTTCATATATTAGAAGTACTGGTAGTGCCATATACTACTCAGACTCTGTGAAGGGCCGATTCACCATCTCCAGGGACAACGCCAAGAACTCACTGTCTCTGCAAATGAACAGCCTGAGAGCCGAGGACACGGCTGTCTATTTCTGTGCGAGAGGTAGTAGCATCTGGTTCCCCAACGAATACTTCCAACACTGGGGCCAG…	IGHV3-11*04	IGHD2-2*01	IGHJ1*01	ARGSSIWFPNEYFQH	15	4.10557	ATGGCCTGGACCGTTCTCCTCCTCGGCCTCCTGTCTCATTGCACAGGCTCTGTGACCTCCTATGTGTTGACTCAGCCACCCTCGGTGTCAGTGGCCCCAGGAAAAACGGCCAGCATTTCCTGTGGGGGAAACAACATCGGAGGTAAAAGTGTCCACTGGTACCAACAGAAGCCAGGCCAGGCCCCTGCATTGGTCCTCTATGATAATAGCGACCGGCCCACAGGGATCCCTGAGCGATTCTCTGGCTCCAACTCTGGGAACACGGCCACCCTGACCATCAGCAGGGTCGAAGCCGGGGATGAGGCCGACTATTACTGTCAGGTGTTGGATAATAATAGTGTTTCATTTGGCGGAGGGACCAAGCTGACCGTCCTAGG	LV3-21	LJ2	QVLDNNSVS	9	5.48387
c31899	201441	NN	ATGGAGTTTGGGCTGAGCTGGGTTTTCCTTGTTGCTATTATACAAGGTGTCCAGTGTCTGGTGCAGCTGGTGGAGTCTGGGGGAGGCTTGGTCGAGCCTGGAGGGTCCCTGAGACTCTCCTGTGCAGCCTCTGGATTCAGCTTCAGTGACTACGACATGACCTGGATGCGCCAGGCTCCAGGGAAGGGGCTGGAGTGGGTTTCATATATTAGAAGTACTGGTAGTGCCATATACTACTCAGACTCTGTGAAGGGCCGATTCACCATCTCCAGGGACAACGCCAAGAACTCACTGTCTCTGCAAATGAACAGCCTGAGAGCCGAGGACACGGCTGTCTATTTCTGTGCGAGAGGTAGTAGCATCTGGTTCCCCAACGAATACTTCCAACACTGGGGCCAG…	IGHV3-11*04	IGHD2-2*01	IGHJ1*01	ARGSSIWFPNEYFQH	15	4.10557	ATGGCCTGGACCGTTCTCCTCCTCGGCCTCCTGTCTCATTGCACAGGCTCTGTGACCTCCTATGTGTTGACTCAGCCACCCTCGGTGTCAGTGGCCCCAGGAAAAACGGCCAGCATTTCCTGTGGGGGAAACAACATCGGAGGTAAAAGTGTCCACTGGTACCAACAGAAGCCAGGCCAGGCCCCTGCATTGGTCCTCTATGATAATAGCGACCGGCCCACAGGGATCCCTGAGCGATTCTCTGGCTCCAACTCTGGGAACACGGCCACCCTGACCATCAGCAGGGTCGAAGCCGGGGATGAGGCCGACTATTACTGTCAGGTGTTGGATAATAATAGTGTTTCATTTGGCGGAGGGACCAAGCTGACCGTCCTAGG	LV3-21	LJ2	QVLDNNSVS	9	5.48387
c31890	201441	NN	ATGGAGTTTGGGCTGAGCTGGGTTTTCCTTGTTGCTATTATACAAGGTGTCCAGTGTCTGGTGCAGCTGGTGGAGTCTGGGGGAGGCTTGGTCGAGCCTGGAGGGTCCCTGAGACTCTCCTGTGCAGCCTCTGGATTCAGCTTCAGTGACTACGACATGACCTGGATGCGCCAGGCTCCAGGGAAGGGGCTGGAGTGGGTTTCATATATTAGAAGTACTGGTAGTGCCATATACTACTCAGACTCTGTGAAGGGCCGATTCACCATCTCCAGGGACAACGCCAAGAACTCACTGTCTCTGCAAATGAACAGCCTGAGAGCCGAGGACACGGCTGTCTATTTCTGTGCGAGAGGTAGTAGCATCTGGTTCCCCAACGAATACTTCCAACACTGGGGCCAG…	IGHV3-11*04	IGHD2-2*01	IGHJ1*01	ARGSSIWFPNEYFQH	15	4.10557	ATGGCCTGGACCGTTCTCCTCCTCGGCCTCCTGTCTCATTGCACAGGCTCTGTGACCTCCTATGTGTTGACTCAGCCACCCTCGGTGTCAGTGGCCCCAGGAAAAACGGCCAGCATTTCCTGTGGGGGAAACAACATCGGAGGTAAAAGTGTCCACTGGTACCAACAGAAGCCAGGCCAGGCCCCTGCATTGGTCCTCTATGATAATAGCGACCGGCCCACAGGGATCCCTGAGCGATTCTCTGGCTCCAACTCTGGGAACACGGCCACCCTGACCATCAGCAGGGTCGAAGCCGGGGATGAGGCCGACTATTACTGTCAGGTGTTGGATAATAATAGTGTTTCATTTGGCGGAGGGACCAAGCTGACCGTCCTAGG	LV3-21	LJ2	QVLDNNSVS	9	5.48387
c31876	201441	NN	ATGGAGTTTGGGCTGAGCTGGGTTTTCCTTGTTGCTATTATACAAGGTGTCCAGTGTCTGGTGCAGCTGGTGGAGTCTGGGGGAGGCTTGGTCGAGCCTGGAGGGTCCCTGAGACTCTCCTGTGCAGCCTCTGGATTCAGCTTCAGTGACTACGACATGACCTGGATGCGCCAGGCTCCAGGGAAGGGGCTGGAGTGGGTTTCATATATTAGAAGTACTGGTAGTGCCATATACTACTCAGACTCTGTGAAGGGCCGATTCACCATCTCCAGGGACAACGCCAAGAACTCACTGTCTCTGCAAATGAACAGCCTGAGAGCCGAGGACACGGCTGTCTATTTCTGTGCGAGAGGTAGTAGCATCTGGTTCCCCAACGAATACTTCCAACACTGGGGCCAG…	IGHV3-11*04	IGHD2-2*01	IGHJ1*01	ARGSSIWFPNEYFQH	15	4.10557	ATGGCCTGGACCGTTCTCCTCCTCGGCCTCCTGTCTCATTGCACAGGCTCTGTGACCTCCTATGTGTTGACTCAGCCACCCTCGGTGTCAGTGGCCCCAGGAAAAACGGCCAGCATTTCCTGTGGGGGAAACAACATCGGAGGTAAAAGTGTCCACTGGTACCAACAGAAGCCAGGCCAGGCCCCTGCATTGGTCCTCTATGATAATAGCGACCGGCCCACAGGGATCCCTGAGCGATTCTCTGGCTCCAACTCTGGGAACACGGCCACCCTGACCATCAGCAGGGTCGAAGCCGGGGATGAGGCCGACTATTACTGTCAGGTGTTGGATAATAATAGTGTTTCATTTGGCGGAGGGACCAAGCTGACCGTCCTAGG	LV3-21	LJ2	QVLDNNSVS	9	5.48387
c31927	201441	NN	ATGGACTGGACCTGGAGCATCCTTTTCTTGGTGGCAGCAGCAAGAGGTGCCCACTCGCAGGTTCAACTGGTGCAGTCTGGAGCTGAGGTGAAGGAGCCTGGGGCCTCAGTGAAGGTCTCCTGCAAGACCTCAGGTTACACCTTTACCACCTCTGGAATCACCTGGGTGCGACAGGCCCCTGGACAGGGGCTTGAGTGGATGGGATGGATCAGTGTTTACAATGATAGGAGAGAATTTGCCCAGAATATTCAGGACAGAGTCACCATGACCACAGACACATCGACGAACACCGCCTATTTGGAGCTGCGGAGCCTGAGATCTGACGACACGGCCATGTATTACTGTGCGAGAGATTTTGACAAGGGGGGATACAATTTTTTTAGTGGTCATTATAGCGGC…	IGHV1-18*01	IGHD3-3*01	IGHJ4*02	ARDFDKGGYNFFSGHYSGYFEH	22	9.94152	ATGGAAGCCCCAGCGCAGCTTCTCTTCCTCCTGCTACTCTGGCTCCCAGTTACCACTGGAGAAACAGTGATGACGCAGTCTCCAGCCACCCTGTCTGTGTCTCCTGGGGGAAGAGCCACCCTCTCCTGCAGGGCCAGTCAGAGTGTTAGGAGCAACTTGGCCTGGTACCAGCAGAAACCTGGCCAGGCTCCCAGGCTCCTCATCTATGGTGCATCCACCAGGGCCACTGGTATCTCAGACAGGTTCAGAGGCAGTGGGTCTGAGACAGACTTCACTCTCACCATCAGCAACCTGCAGTCTGAAGATTTTGGAGTATATTACTGTCAACAATATAATAACTGGCCCCGGGGCAGTTTTGGCCAGGGGACCAAGCTGGAGATCAAACG	KV3-15	KJ2	QQYNNWPRGS	10	4.70219
c31912	201441	NN	ATGGACTGGACCTGGAGCATCCTTTTCTTGGTGGCAGCAGCAAGAGGTGCCCACTCGCAGGTTCAACTGGTGCAGTCTGGAGCTGAGGTGAAGGAGCCTGGGGCCTCAGTGAAGGTCTCCTGCAAGACCTCAGGTTACACCTTTACCACCTCTGGAATCACCTGGGTGCGACAGGCCCCTGGACAGGGGCTTGAGTGGATGGGATGGATCAGTGTTTACAATGATAGGAGAGAATTTGCCCAGAATATTCAGGACAGAGTCACCATGACCACAGACACATCGACGAACACCGCCTATTTGGAGCTGCGGAGCCTGAGATCTGACGACACGGCCATGTATTACTGTGCGAGAGATTTTGACAAGGGGGGATACAATTTTTTTAGTGGTCATTATAGCGGC…	IGHV1-18*01	IGHD3-3*01	IGHJ4*02	ARDFDKGGYNFFSGHYSGYFEH	22	9.94152	ATGGAAGCCCCAGCGCAGCTTCTCTTCCTCCTGCTACTCTGGCTCCCAGTTACCACTGGAGAAACAGTGATGACGCAGTCTCCAGCCACCCTGTCTGTGTCTCCTGGGGGAAGAGCCACCCTCTCCTGCAGGGCCAGTCAGAGTGTTAGGAGCAACTTGGCCTGGTACCAGCAGAAACCTGGCCAGGCTCCCAGGCTCCTCATCTATGGTGCATCCACCAGGGCCACTGGTATCTCAGACAGGTTCAGAGGCAGTGGGTCTGAGACAGACTTCACTCTCACCATCAGCAACCTGCAGTCTGAAGATTTTGGAGTATATTACTGTCAACAATATAATAACTGGCCCCGGGGCAGTTTTGGCCAGGGGACCAAGCTGGAGATCAAACG	KV3-15	KJ2	QQYNNWPRGS	10	4.70219
c31889	201441	NN	ATGGACCTCCTGCACAAGAACATGAAACACCTGTGGTTCTTCCTCCTCCTAGTGGCAGCTCCCAGATGGGTCCTGTCCCAGGTGCGGCTACAACAGTGGGGCGCAGGACTTTTGAAGCCTTCAGAGACCCTGTCCCTCACCTGCGCTGTCTATGGTGGGTCCTTCAACGATTACTACTGGGGCTGGATCCGCCAGACCCCAGGGAAGGGGCTTGAGTGGATTGGGGAGATCGATCATCGTGGAAGCACAAACTACAACCCGTCCCTCAAGAGTCGAGTCTCCATTTCACTGGACACGTCCAAGACCCAGTTCTCCCTGAAGGTGAAATCTCTGACCGCCGCGGACACGGCTGTGTATTACTGTGCGAGAGGCGAGGGGGCAGCAGTTGGCTTCTACTGG…	IGHV4-34*02	IGHD6-13*01	IGHJ2*01	ARGEGAAVGFYWYFDV	16	6.66667	ATGGCCAGCTTCCCTCTCCTCCTCACCCTCCTCACTCACTGTGCAGGGTCCTGGGCCCAGTCTGAACTGACTCAGCCACCCTCAACGTCTGGGACCCCCGGGCAGACGGTCACCATCTCATGTTCTGGAAACATCTCCAACATCGGGACTAATACTGTAAACTGGTACCAGCAGCTCCCAGGAACGGCCCCCAGACTCCTCATCTATATTAATGATCAGCGGCCGTCTGGGGTCCCTGACCGGTTCTCTGGCTCCAAGTCGGGCACCTCAGCCTCCCTGGCCATCAGTGGGCTCCAGTCTGAGGATGAGGCTGATTACTACTGTGCAGTGTGGGATGACAGCCTGAATGGTGTTTTCGGCGGAGGGACCAAGTTGACCGTCCTAGG	LV1-44	LJ3	AVWDDSLNGV	10	6.17284
c31892	201441	NN	ATGGACCTCCTGCACAAGAACATGAAACACCTGTGGTTCTTCCTCCTCCTAGTGGCAGCTCCCAGATGGGTCCTGTCCCAGGTGCGGCTACAACAGTGGGGCGCAGGACTTTTGAAGCCTTCAGAGACCCTGTCCCTCACCTGCGCTGTCTATGGTGGGTCCTTCAACGATTACTACTGGGGCTGGATCCGCCAGACCCCAGGGAAGGGGCTTGAGTGGATTGGGGAGATCGATCATCGTGGAAGCACAAACTACAACCCGTCCCTCAAGAGTCGAGTCTCCATTTCACTGGACACGTCCAAGACCCAGTTCTCCCTGAAGGTGAAATCTCTGACCGCCGCGGACACGGCTGTGTATTACTGTGCGAGAGGCGAGGGGGCAGCAGTTGGCTTCTACTGG…	IGHV4-34*02	IGHD6-13*01	IGHJ2*01	ARGEGAAVGFYWYFDV	16	6.66667	ATGGCCAGCTTCCCTCTCCTCCTCACCCTCCTCACTCACTGTGCAGGGTCCTGGGCCCAGTCTGAACTGACTCAGCCACCCTCAACGTCTGGGACCCCCGGGCAGACGGTCACCATCTCATGTTCTGGAAACATCTCCAACATCGGGACTAATACTGTAAACTGGTACCAGCAGCTCCCAGGAACGGCCCCCAGACTCCTCATCTATATTAATGATCAGCGGCCGTCTGGGGTCCCTGACCGGTTCTCTGGCTCCAAGTCGGGCACCTCAGCCTCCCTGGCCATCAGTGGGCTCCAGTCTGAGGATGAGGCTGATTACTACTGTGCAGTGTGGGATGACAGCCTGAATGGTGTTTTCGGCGGAGGGACCAAGTTGACCGTCCTAGG	LV1-44	LJ3	AVWDDSLNGV	10	6.17284
c31904	201441	NN	ATGGACCTCCTGCACAAGAACATGAAACACCTGTGGTTCTTCCTCCTCCTAGTGGCAGCTCCCAGATGGGTCCTGTCCCAGGTGCGGCTACAACAGTGGGGCGCAGGACTTTTGAAGCCTTCAGAGACCCTGTCCCTCACCTGCGCTGTCTATGGTGGGTCCTTCAACGATTACTACTGGGGCTGGATCCGCCAGACCCCAGGGAAGGGGCTTGAGTGGATTGGGGAGATCGATCATCGTGGAAGCACAAACTACAACCCGTCCCTCAAGAGTCGAGTCTCCATTTCACTGGACACGTCCAAGACCCAGTTCTCCCTGAAGGTGAAATCTCTGACCGCCGCGGACACGGCTGTGTATTACTGTGCGAGAGGCGAGGGGGCAGCAGTTGGCTTCTACTGG…	IGHV4-34*02	IGHD6-13*01	IGHJ2*01	ARGEGAAVGFYWYFDV	16	6.66667	ATGGCCAGCTTCCCTCTCCTCCTCACCCTCCTCACTCACTGTGCAGGGTCCTGGGCCCAGTCTGAACTGACTCAGCCACCCTCAACGTCTGGGACCCCCGGGCAGACGGTCACCATCTCATGTTCTGGAAACATCTCCAACATCGGGACTAATACTGTAAACTGGTACCAGCAGCTCCCAGGAACGGCCCCCAGACTCCTCATCTATATTAATGATCAGCGGCCGTCTGGGGTCCCTGACCGGTTCTCTGGCTCCAAGTCGGGCACCTCAGCCTCCCTGGCCATCAGTGGGCTCCAGTCTGAGGATGAGGCTGATTACTACTGTGCAGTGTGGGATGACAGCCTGAATGGTGTTTTCGGCGGAGGGACCAAGTTGACCGTCCTAGG	LV1-44	LJ3	AVWDDSLNGV	10	6.17284
c31917	201441	NN	ATGGACCTCCTGCACAAGAACATGAAACACCTGTGGTTCTTCCTCCTCCTAGTGGCAGCTCCCAGATGGGTCCTGTCCCAGGTGCGGCTACAACAGTGGGGCGCAGGACTTTTGAAGCCTTCAGAGACCCTGTCCCTCACCTGCGCTGTCTATGGTGGGTCCTTCAACGATTACTACTGGGGCTGGATCCGCCAGACCCCAGGGAAGGGGCTTGAGTGGATTGGGGAGATCGATCATCGTGGAAGCACAAACTACAACCCGTCCCTCAAGAGTCGAGTCTCCATTTCACTGGACACGTCCAAGACCCAGTTCTCCCTGAAGGTGAAATCTCTGACCGCCGCGGACACGGCTGTGTATTACTGTGCGAGAGGCGAGGGGGCAGCAGTTGGCTTCTACTGG…	IGHV4-34*02	IGHD6-13*01	IGHJ2*01	ARGEGAAVGFYWYFDV	16	6.66667	ATGGCCAGCTTCCCTCTCCTCCTCACCCTCCTCACTCACTGTGCAGGGTCCTGGGCCCAGTCTGAACTGACTCAGCCACCCTCAACGTCTGGGACCCCCGGGCAGACGGTCACCATCTCATGTTCTGGAAACATCTCCAACATCGGGACTAATACTGTAAACTGGTACCAGCAGCTCCCAGGAACGGCCCCCAGACTCCTCATCTATATTAATGATCAGCGGCCGTCTGGGGTCCCTGACCGGTTCTCTGGCTCCAAGTCGGGCACCTCAGCCTCCCTGGCCATCAGTGGGCTCCAGTCTGAGGATGAGGCTGATTACTACTGTGCAGTGTGGGATGACAGCCTGAATGGTGTTTTCGGCGGAGGGACCAAGTTGACCGTCCTAGG	LV1-44	LJ3	AVWDDSLNGV	10	6.17284
c31900	201441	NN	ATGGAGTTTGGGCTGAGCTGGGTTTTCCTCGTTGCTCTTTTAAGAGGTGTCCAGTGTCAGGTGCAGCTGGTGGAGTCGGGGGGAGGCGTTGTCCAGCCTGGGAGGTCCCTAAGGCTCTCCTGTGCAGCCTCTGGATATGCCTTCAGTACCTATGGCATGCACTGGGTCCGCCAGGCTCCAGGCAAGGGGCTGGAGTGGGTGGCAGTTATATCAGATGATGGAAATAACCAACACTACGCAGACTCCGTGAAGGGCCGATTCACCATCTCCAGAGACAATTCCAAGAACACGGTATATTTGCAAATGAACAGCCTGAGAGGTGAAGACACGGCTGTATATTACTGTGCGAATGGGGCACGAGGATTTAGTCTTTTTGACTACTGGGGCCAGGGAACCCTG…	IGHV3-30*18	IGHD2-15*01	IGHJ4*02	ANGARGFSLFDY	12	6.26866	ATGAGGCTCCCTGCTCAGCTCCTGGGGCTGCTAATGCTCTGGGTCTCTGGATCCAGTGGGAATATTGTGATGACTCAGTCTCCACTCTCCCTGCCCGTCACCCCTGGAGAGCCGGCCTCCATCTCCTGCAGGTCTAGTCAGAGCGTCCTGCATGAGAATGGATACAACTATTTGGATTGGTACCTGCAGAAGCCAGGGCAGTCTCCACAGCTCCTGATCTATTTGGGTTCTAATCGGGCCTCCGGGGTCCCTGACAGGTTCAGTGGCAGTGGGTCGGGCACAGAGTTTACACTGAGAATCAGCACAGTGGAGGCTGAGGATGTTGGCGTTTATTACTGCATGCAATCTCTACACACGGTCACCTTCGGCCAAGGGACACGACTGGAGATTAAACG	KV2-28	KJ5	MQSLHTVT	8	3.63636
c31914	201441	NN	ATGGAGTTTGGGCTGAGCTGGCTTTTTCTTGTGGCTATTTTAAAAGGTGTCCAGTGTGAGGTGCAGCTGTCGGAATCTGGGGGAGGCTTGGTACAGCCTGGGGGGTCCCTCAGACTCTCCTGTGCAGCCTCTGAATTCCCCTTCAGCAGCTATGCCATGGCCTGGGTCCGCCAGTCTCCAGGGAAGCGCCTGGAGTGGGTCTCGGGTATCAGTGGTAGTGGAAGTAATACATACTATTCAGGCTCCGTGAAGGGCCGGTTCACCATCTCCAGAGACAACTCCAAGAACACGGTGAATCTGCAAATGAACAGTCTGAGAGACGAAGACACGGCCGTGTATTACTGTGCGAGAGGCCCCTCGGTTTGGAGTGCTTATACGGGTTTCTTTTTTGCCTACTGG…	IGHV3-23*01	IGHD3-16*01	IGHJ4*02	ARGPSVWSAYTGFFFAY	17	9.88024	ATGGAAACCCCAGCGCAGCTTCTCTTCCTCCTGCTACTCTGGCTCCCAGAAACCACCGGAGAAATTGTGTTGACGCAGTCTCCAGGCATCGTGTCTTTGTCTCCAGGGGAGAGAGCCACCCTCTCATGCAGGGCCAGTCAGACTGTTACCAGCAACTACTTAGCCTGGTACCAGCAGAGACCTGGCCTGGCGCCCAGGCTCCTCATCTATGATGCAACCAACAGGGCCACTGGCATCCCAGACAGGTTCAGTGGCAGTGGGTCTGGGACAGGCTTCACTCTCACCATCAGCAGACTGGAGCCTGAAGATTTTGCAGTGTATTACTGTCAGCAGTATGGTAGCTCTCCTCTCACTTTCGGCGGAGGGACCAAGGTGGACATCAAACG	KV3D-20	KJ4	QQYGSSPLT	9	4.62963
c31897	201441	NN	ATGGACTGGACCTGGAGGATCCTCTTCTTGGTGGCAGCAGCCACAGGAGCCCACTCCCAGGTGCAGCTGGTGCAGTCTGGGGCTGAGGTGAAGAAGCCTGGGGCCTCAGTGAAGGTCTCCTGCAAGTCTTCTGGATACACCTTCACCGACTACTCTATGCACTGGGTGCGACAGGCCCCTGGACAAGGGCTTGAGTGGATGGCCTGGATCAACCCTAACACTGGTGGCACAACCTATGCACAGAAGTTTCAGGGCAGGGTCACCGTGACCAGGGACACGTCCATCAGCACAGCCTACATGGAACTGAACAGCCTGACATCTGACGACACGGCCGTGTTCTACTGTGCGAGGGGTAGTACCTCCCACCCACATGACTACTGGGGCCAGGGAACCCTGGTC…	IGHV1-2*02	IGHD2-2*01	IGHJ4*02	ARGSTSHPHDY	11	4.2042	ATGGTGTTGCAGACCCAGGTCTTCATTTCTCTGTTGCTCTGGATCTCTGGTGCCTACGGGGACATCGTGATGACCCAGTCTCCAGACTCCCTGGCTGTGTCTCTGGGCGAGAGGGCCACCATCAACTGCAAGTCCAGCCAGAGTGTTTTATACAGCTCCAACAATAACAACTACTTAGCTTGGTATCAGCAGAAACCAGGACAGCCTCCTAAACTACTCATTTACTGGGCATCTACCCGGGAATCCGGGGTCCCTGACCGATTCAGTGGCAGCGGGTCTGGGACAGATTTCACTCTCACCATCAGCAGCCTGCAGTCTGAAGATGTGGCAGTTTATTACTGTCAGCAGTATTATAGTACTCCTCGAACGTTCGGCCCAGGGACCAAGGTGGAAGTCAAA…	KV4-1	KJ1	QQYYSTPRT	9	2.37389
c31863	201441	NN	ATGGACTGGACCTGGAGGATCCTCTTCTTGGTGGCAGCAGCCACAGGAGCCCACTCCCAGGTGCAGCTGGTGCAGTCTGGGGCTGAGGTGAAGAAGCCTGGGGCCTCAGTGAAGGTCTCCTGCAAGTCTTCTGGATACACCTTCACCGACTACTCTATGCACTGGGTGCGACAGGCCCCTGGACAAGGGCTTGAGTGGATGGCCTGGATCAACCCTAACACTGGTGGCACAACCTATGCACAGAAGTTTCAGGGCAGGGTCACCGTGACCAGGGACACGTCCATCAGCACAGCCTACATGGAACTGAACAGCCTGACATCTGACGACACGGCCGTGTTCTACTGTGCGAGGGGTAGTACCTCCCACCCACATGACTACTGGGGCCAGGGAACCCTGGTC…	IGHV1-2*02	IGHD2-2*01	IGHJ4*02	ARGSTSHPHDY	11	4.2042	ATGGTGTTGCAGACCCAGGTCTTCATTTCTCTGTTGCTCTGGATCTCTGGTGCCTACGGGGACATCGTGATGACCCAGTCTCCAGACTCCCTGGCTGTGTCTCTGGGCGAGAGGGCCACCATCAACTGCAAGTCCAGCCAGAGTGTTTTATACAGCTCCAACAATAACAACTACTTAGCTTGGTATCAGCAGAAACCAGGACAGCCTCCTAAACTACTCATTTACTGGGCATCTACCCGGGAATCCGGGGTCCCTGACCGATTCAGTGGCAGCGGGTCTGGGACAGATTTCACTCTCACCATCAGCAGCCTGCAGTCTGAAGATGTGGCAGTTTATTACTGTCAGCAGTATTATAGTACTCCTCGAACGTTCGGCCCAGGGACCAAGGTGGAAGTCAAA…	KV4-1	KJ1	QQYYSTPRT	9	2.37389
c31874	201441	NN	ATGGACTGGACCTGGAGGATCCTCTTCTTGGTGGCAGCAGCCACAGGAGCCCACTCCCAGGTGCAGCTGGTGCAGTCTGGGGCTGAGGTGAAGAAGCCTGGGGCCTCAGTGAAGGTCTCCTGCAAGTCTTCTGGATACACCTTCACCGACTACTCTATGCACTGGGTGCGACAGGCCCCTGGACAAGGGCTTGAGTGGATGGCCTGGATCAACCCTAACACTGGTGGCACAACCTATGCACAGAAGTTTCAGGGCAGGGTCACCGTGACCAGGGACACGTCCATCAGCACAGCCTACATGGAACTGAACAGCCTGACATCTGACGACACGGCCGTGTTCTACTGTGCGAGGGGTAGTACCTCCCACCCACATGACTACTGGGGCCAGGGAACCCTGGTC…	IGHV1-2*02	IGHD2-2*01	IGHJ4*02	ARGSTSHPHDY	11	4.2042	ATGGTGTTGCAGACCCAGGTCTTCATTTCTCTGTTGCTCTGGATCTCTGGTGCCTACGGGGACATCGTGATGACCCAGTCTCCAGACTCCCTGGCTGTGTCTCTGGGCGAGAGGGCCACCATCAACTGCAAGTCCAGCCAGAGTGTTTTATACAGCTCCAACAATAACAACTACTTAGCTTGGTATCAGCAGAAACCAGGACAGCCTCCTAAACTACTCATTTACTGGGCATCTACCCGGGAATCCGGGGTCCCTGACCGATTCAGTGGCAGCGGGTCTGGGACAGATTTCACTCTCACCATCAGCAGCCTGCAGTCTGAAGATGTGGCAGTTTATTACTGTCAGCAGTATTATAGTACTCCTCGAACGTTCGGCCCAGGGACCAAGGTGGAAGTCAAA…	KV4-1	KJ1	QQYYSTPRT	9	2.37389
c31882	201441	NN	ATGGACTGGACCTGGAGGATCCTCTTCTTGGTGGCAGCAGCCACAGGAGCCCACTCCCAGGTGCAGCTGGTGCAGTCTGGGGCTGAGGTGAAGAAGCCTGGGGCCTCAGTGAAGGTCTCCTGCAAGTCTTCTGGATACACCTTCACCGACTACTCTATGCACTGGGTGCGACAGGCCCCTGGACAAGGGCTTGAGTGGATGGCCTGGATCAACCCTAACACTGGTGGCACAACCTATGCACAGAAGTTTCAGGGCAGGGTCACCGTGACCAGGGACACGTCCATCAGCACAGCCTACATGGAACTGAACAGCCTGACATCTGACGACACGGCCGTGTTCTACTGTGCGAGGGGTAGTACCTCCCACCCACATGACTACTGGGGCCAGGGAACCCTGGTC…	IGHV1-2*02	IGHD2-2*01	IGHJ4*02	ARGSTSHPHDY	11	4.2042	ATGGTGTTGCAGACCCAGGTCTTCATTTCTCTGTTGCTCTGGATCTCTGGTGCCTACGGGGACATCGTGATGACCCAGTCTCCAGACTCCCTGGCTGTGTCTCTGGGCGAGAGGGCCACCATCAACTGCAAGTCCAGCCAGAGTGTTTTATACAGCTCCAACAATAACAACTACTTAGCTTGGTATCAGCAGAAACCAGGACAGCCTCCTAAACTACTCATTTACTGGGCATCTACCCGGGAATCCGGGGTCCCTGACCGATTCAGTGGCAGCGGGTCTGGGACAGATTTCACTCTCACCATCAGCAGCCTGCAGTCTGAAGATGTGGCAGTTTATTACTGTCAGCAGTATTATAGTACTCCTCGAACGTTCGGCCCAGGGACCAAGGTGGAAGTCAAA…	KV4-1	KJ1	QQYYSTPRT	9	2.37389
c31878	201441	NN	ATGGACTGGACCTGGAGGTTCCTCTTTGTGGTGGCAGCAGCTACAGGTGTCCAGTCCCAGGGCCAGCTGGTGCAGTCTGGGGCTGAGGTGAAGAAGCCTGGGTCCTCAGTGAAGGTCTCCTGCAAGGCTTCTGGAGGCACCCTCACCAACTATGGTATCAGCTGGGTGCGACAGGCCCCTGGACAAGGGCTTGAGTGGATGGGAGGGATCATCCCAATTCTTCGTACAACAAACTACGCACAGAACTTCCAGGGCAGAGTCACCATAACCGCGGACGAATCCACGGCCACAGTCTACATGGAGCTGAGCAGCCTGAGATCTGAGGACACGGCCGTATACTACTGTGCGAGAGGAACCTCCCTAACTGGGGATTTTGAGTTTTCTATATCGGTCGACGAT…	IGHV1-69*13	IGHD7-27*01	IGHJ6*03	ARGTSLTGDFEFSISVDDYYDYFYMDV	27	6.16246	ATGGCCGGCTTCCCTCTCCTCCTCACCCTCCTCACTCACTGTGCAGGGTCCTGGGCCCAGTCTGTGCTGACTCAGCCACCCTCAGCGTCTGGGACCCCCGGGCAGAGGGTCACCATCTCTTGTTCTGGAAGCACCTCCAACATCGGAAGTCATCATGTATACTGGTACCAGGAGGTCCCAGGAACGGCCCCCAAACTCCTCATCTATAGGAATAATCAGCGGCCCTCAGGGGTCCCTGACCGATTCTCTGGCTCCAAGTCTGGCGCCTCAGCCTCCCTGGCCATCAGTGGGCTCCGGTCCGAGGATGAGGCTGATTATTTCTGTGCAGCATGGGATGACACCCTGAGTGGTTCCTTGGTGTTCGGCGGAGGGACCAAGCTGACCGTCCTAGG	LV1-47	LJ3	AAWDDTLSGSLV	12	2.43902
c31913	201441	NN	ATGGACTGGACCTGGAGGTTCCTCTTTGTGGTGGCAGCAGCTACAGGTGTCCAGTCCCAGGGCCAGCTGGTGCAGTCTGGGGCTGAGGTGAAGAAGCCTGGGTCCTCAGTGAAGGTCTCCTGCAAGGCTTCTGGAGGCACCCTCACCAACTATGGTATCAGCTGGGTGCGACAGGCCCCTGGACAAGGGCTTGAGTGGATGGGAGGGATCATCCCAATTCTTCGTACAACAAACTACGCACAGAACTTCCAGGGCAGAGTCACCATAACCGCGGACGAATCCACGGCCACAGTCTACATGGAGCTGAGCAGCCTGAGATCTGAGGACACGGCCGTATACTACTGTGCGAGAGGAACCTCCCTAACTGGGGATTTTGAGTTTTCTATATCGGTCGACGAT…	IGHV1-69*13	IGHD7-27*01	IGHJ6*03	ARGTSLTGDFEFSISVDDYYDYFYMDV	27	6.16246	ATGGCCGGCTTCCCTCTCCTCCTCACCCTCCTCACTCACTGTGCAGGGTCCTGGGCCCAGTCTGTGCTGACTCAGCCACCCTCAGCGTCTGGGACCCCCGGGCAGAGGGTCACCATCTCTTGTTCTGGAAGCACCTCCAACATCGGAAGTCATCATGTATACTGGTACCAGGAGGTCCCAGGAACGGCCCCCAAACTCCTCATCTATAGGAATAATCAGCGGCCCTCAGGGGTCCCTGACCGATTCTCTGGCTCCAAGTCTGGCGCCTCAGCCTCCCTGGCCATCAGTGGGCTCCGGTCCGAGGATGAGGCTGATTATTTCTGTGCAGCATGGGATGACACCCTGAGTGGTTCCTTGGTGTTCGGCGGAGGGACCAAGCTGACCGTCCTAGG	LV1-47	LJ3	AAWDDTLSGSLV	12	2.43902
c31860	201441	NN	ATGGACTGGACCTGGAGGTTCCTCTTTGTGGTGGCAGCAGCTACAGGTGTCCAGTCCCAGGGCCAGCTGGTGCAGTCTGGGGCTGAGGTGAAGAAGCCTGGGTCCTCAGTGAAGGTCTCCTGCAAGGCTTCTGGAGGCACCCTCACCAACTATGGTATCAGCTGGGTGCGACAGGCCCCTGGACAAGGGCTTGAGTGGATGGGAGGGATCATCCCAATTCTTCGTACAACAAACTACGCACAGAACTTCCAGGGCAGAGTCACCATAACCGCGGACGAATCCACGGCCACAGTCTACATGGAGCTGAGCAGCCTGAGATCTGAGGACACGGCCGTATACTACTGTGCGAGAGGAACCTCCCTAACTGGGGATTTTGAGTTTTCTATATCGGTCGACGAT…	IGHV1-69*13	IGHD7-27*01	IGHJ6*03	ARGTSLTGDFEFSISVDDYYDYFYMDV	27	6.16246	ATGGCCGGCTTCCCTCTCCTCCTCACCCTCCTCACTCACTGTGCAGGGTCCTGGGCCCAGTCTGTGCTGACTCAGCCACCCTCAGCGTCTGGGACCCCCGGGCAGAGGGTCACCATCTCTTGTTCTGGAAGCACCTCCAACATCGGAAGTCATCATGTATACTGGTACCAGGAGGTCCCAGGAACGGCCCCCAAACTCCTCATCTATAGGAATAATCAGCGGCCCTCAGGGGTCCCTGACCGATTCTCTGGCTCCAAGTCTGGCGCCTCAGCCTCCCTGGCCATCAGTGGGCTCCGGTCCGAGGATGAGGCTGATTATTTCTGTGCAGCATGGGATGACACCCTGAGTGGTTCCTTGGTGTTCGGCGGAGGGACCAAGCTGACCGTCCTAGG	LV1-47	LJ3	AAWDDTLSGSLV	12	2.43902
c31910	201441	NN	ATGGACTGGACCTGGAGGTTCCTCTTTGTGGTGGCAGCAGCTACAGGTGTCCAGTCCCAGGGCCAGCTGGTGCAGTCTGGGGCTGAGGTGAAGAAGCCTGGGTCCTCAGTGAAGGTCTCCTGCAAGGCTTCTGGAGGCACCCTCACCAACTATGGTATCAGCTGGGTGCGACAGGCCCCTGGACAAGGGCTTGAGTGGATGGGAGGGATCATCCCAATTCTTCGTACAACAAACTACGCACAGAACTTCCAGGGCAGAGTCACCATAACCGCGGACGAATCCACGGCCACAGTCTACATGGAGCTGAGCAGCCTGAGATCTGAGGACACGGCCGTATACTACTGTGCGAGAGGAACCTCCCTAACTGGGGATTTTGAGTTTTCTATATCGGTCGACGAT…	IGHV1-69*13	IGHD7-27*01	IGHJ6*03	ARGTSLTGDFEFSISVDDYYDYFYMDV	27	6.16246	ATGGCCGGCTTCCCTCTCCTCCTCACCCTCCTCACTCACTGTGCAGGGTCCTGGGCCCAGTCTGTGCTGACTCAGCCACCCTCAGCGTCTGGGACCCCCGGGCAGAGGGTCACCATCTCTTGTTCTGGAAGCACCTCCAACATCGGAAGTCATCATGTATACTGGTACCAGGAGGTCCCAGGAACGGCCCCCAAACTCCTCATCTATAGGAATAATCAGCGGCCCTCAGGGGTCCCTGACCGATTCTCTGGCTCCAAGTCTGGCGCCTCAGCCTCCCTGGCCATCAGTGGGCTCCGGTCCGAGGATGAGGCTGATTATTTCTGTGCAGCATGGGATGACACCCTGAGTGGTTCCTTGGTGTTCGGCGGAGGGACCAAGCTGACCGTCCTAGG	LV1-47	LJ3	AAWDDTLSGSLV	12	2.43902
c31918	201441	NN	ATGGACTGGACCTGGAGGTTCCTCTTTGTGGTGGCAGCAGCTACAGGTGTCCAGTCCCAGGGCCAGCTGGTGCAGTCTGGGGCTGAGGTGAAGAAGCCTGGGTCCTCAGTGAAGGTCTCCTGCAAGGCTTCTGGAGGCACCCTCACCAACTATGGTATCAGCTGGGTGCGACAGGCCCCTGGACAAGGGCTTGAGTGGATGGGAGGGATCATCCCAATTCTTCGTACAACAAACTACGCACAGAACTTCCAGGGCAGAGTCACCATAACCGCGGACGAATCCACGGCCACAGTCTACATGGAGCTGAGCAGCCTGAGATCTGAGGACACGGCCGTATACTACTGTGCGAGAGGAACCTCCCTAACTGGGGATTTTGAGTTTTCTATATCGGTCGACGAT…	IGHV1-69*13	IGHD7-27*01	IGHJ6*03	ARGTSLTGDFEFSISVDDYYDYFYMDV	27	6.16246	ATGGCCGGCTTCCCTCTCCTCCTCACCCTCCTCACTCACTGTGCAGGGTCCTGGGCCCAGTCTGTGCTGACTCAGCCACCCTCAGCGTCTGGGACCCCCGGGCAGAGGGTCACCATCTCTTGTTCTGGAAGCACCTCCAACATCGGAAGTCATCATGTATACTGGTACCAGGAGGTCCCAGGAACGGCCCCCAAACTCCTCATCTATAGGAATAATCAGCGGCCCTCAGGGGTCCCTGACCGATTCTCTGGCTCCAAGTCTGGCGCCTCAGCCTCCCTGGCCATCAGTGGGCTCCGGTCCGAGGATGAGGCTGATTATTTCTGTGCAGCATGGGATGACACCCTGAGTGGTTCCTTGGTGTTCGGCGGAGGGACCAAGCTGACCGTCCTAGG	LV1-47	LJ3	AAWDDTLSGSLV	12	2.43902
c31895	201441	NN	ATGGACTGGACCTGGAGGTTCCTCTTTGTGGTGGCAGCAGCTACAGGTGTCCAGTCCCAGGGCCAGCTGGTGCAGTCTGGGGCTGAGGTGAAGAAGCCTGGGTCCTCAGTGAAGGTCTCCTGCAAGGCTTCTGGAGGCACCCTCACCAACTATGGTATCAGCTGGGTGCGACAGGCCCCTGGACAAGGGCTTGAGTGGATGGGAGGGATCATCCCAATTCTTCGTACAACAAACTACGCACAGAACTTCCAGGGCAGAGTCACCATAACCGCGGACGAATCCACGGCCACAGTCTACATGGAGCTGAGCAGCCTGAGATCTGAGGACACGGCCGTATACTACTGTGCGAGAGGAACCTCCCTAACTGGGGATTTTGAGTTTTCTATATCGGTCGACGAT…	IGHV1-69*13	IGHD7-27*01	IGHJ6*03	ARGTSLTGDFEFSISVDDYYDYFYMDV	27	6.16246	ATGGCCGGCTTCCCTCTCCTCCTCACCCTCCTCACTCACTGTGCAGGGTCCTGGGCCCAGTCTGTGCTGACTCAGCCACCCTCAGCGTCTGGGACCCCCGGGCAGAGGGTCACCATCTCTTGTTCTGGAAGCACCTCCAACATCGGAAGTCATCATGTATACTGGTACCAGGAGGTCCCAGGAACGGCCCCCAAACTCCTCATCTATAGGAATAATCAGCGGCCCTCAGGGGTCCCTGACCGATTCTCTGGCTCCAAGTCTGGCGCCTCAGCCTCCCTGGCCATCAGTGGGCTCCGGTCCGAGGATGAGGCTGATTATTTCTGTGCAGCATGGGATGACACCCTGAGTGGTTCCTTGGTGTTCGGCGGAGGGACCAAGCTGACCGTCCTAGG	LV1-47	LJ3	AAWDDTLSGSLV	12	2.43902
c31916	201441	NN	ATGGACTGGACCTGGAGGTTCCTCTTTGTGGTGGCAGCAGCTACAGGTGTCCAGTCCCAGGGCCAGCTGGTGCAGTCTGGGGCTGAGGTGAAGAAGCCTGGGTCCTCAGTGAAGGTCTCCTGCAAGGCTTCTGGAGGCACCCTCACCAACTATGGTATCAGCTGGGTGCGACAGGCCCCTGGACAAGGGCTTGAGTGGATGGGAGGGATCATCCCAATTCTTCGTACAACAAACTACGCACAGAACTTCCAGGGCAGAGTCACCATAACCGCGGACGAATCCACGGCCACAGTCTACATGGAGCTGAGCAGCCTGAGATCTGAGGACACGGCCGTATACTACTGTGCGAGAGGAACCTCCCTAACTGGGGATTTTGAGTTTTCTATATCGGTCGACGAT…	IGHV1-69*13	IGHD7-27*01	IGHJ6*03	ARGTSLTGDFEFSISVDDYYDYFYMDV	27	6.16246	ATGGCCGGCTTCCCTCTCCTCCTCACCCTCCTCACTCACTGTGCAGGGTCCTGGGCCCAGTCTGTGCTGACTCAGCCACCCTCAGCGTCTGGGACCCCCGGGCAGAGGGTCACCATCTCTTGTTCTGGAAGCACCTCCAACATCGGAAGTCATCATGTATACTGGTACCAGGAGGTCCCAGGAACGGCCCCCAAACTCCTCATCTATAGGAATAATCAGCGGCCCTCAGGGGTCCCTGACCGATTCTCTGGCTCCAAGTCTGGCGCCTCAGCCTCCCTGGCCATCAGTGGGCTCCGGTCCGAGGATGAGGCTGATTATTTCTGTGCAGCATGGGATGACACCCTGAGTGGTTCCTTGGTGTTCGGCGGAGGGACCAAGCTGACCGTCCTAGG	LV1-47	LJ3	AAWDDTLSGSLV	12	2.43902
c31906	201441	NN	ATGGACTGGACCTGGAGGTTCCTCTTTGTGGTGGCAGCAGCTACAGGTGTCCAGTCCCAGGGCCAGCTGGTGCAGTCTGGGGCTGAGGTGAAGAAGCCTGGGTCCTCAGTGAAGGTCTCCTGCAAGGCTTCTGGAGGCACCCTCACCAACTATGGTATCAGCTGGGTGCGACAGGCCCCTGGACAAGGGCTTGAGTGGATGGGAGGGATCATCCCAATTCTTCGTACAACAAACTACGCACAGAACTTCCAGGGCAGAGTCACCATAACCGCGGACGAATCCACGGCCACAGTCTACATGGAGCTGAGCAGCCTGAGATCTGAGGACACGGCCGTATACTACTGTGCGAGAGGAACCTCCCTAACTGGGGATTTTGAGTTTTCTATATCGGTCGACGAT…	IGHV1-69*13	IGHD7-27*01	IGHJ6*03	ARGTSLTGDFEFSISVDDYYDYFYMDV	27	6.16246	ATGGCCGGCTTCCCTCTCCTCCTCACCCTCCTCACTCACTGTGCAGGGTCCTGGGCCCAGTCTGTGCTGACTCAGCCACCCTCAGCGTCTGGGACCCCCGGGCAGAGGGTCACCATCTCTTGTTCTGGAAGCACCTCCAACATCGGAAGTCATCATGTATACTGGTACCAGGAGGTCCCAGGAACGGCCCCCAAACTCCTCATCTATAGGAATAATCAGCGGCCCTCAGGGGTCCCTGACCGATTCTCTGGCTCCAAGTCTGGCGCCTCAGCCTCCCTGGCCATCAGTGGGCTCCGGTCCGAGGATGAGGCTGATTATTTCTGTGCAGCATGGGATGACACCCTGAGTGGTTCCTTGGTGTTCGGCGGAGGGACCAAGCTGACCGTCCTAGG	LV1-47	LJ3	AAWDDTLSGSLV	12	2.43902
c31888	201441	NN	ATGGACTGGACCTGGAGGTTCCTCTTTGTGGTGGCAGCAGCTACAGGTGTCCAGTCCCAGGGCCAGCTGGTGCAGTCTGGGGCTGAGGTGAAGAAGCCTGGGTCCTCAGTGAAGGTCTCCTGCAAGGCTTCTGGAGGCACCCTCACCAACTATGGTATCAGCTGGGTGCGACAGGCCCCTGGACAAGGGCTTGAGTGGATGGGAGGGATCATCCCAATTCTTCGTACAACAAACTACGCACAGAACTTCCAGGGCAGAGTCACCATAACCGCGGACGAATCCACGGCCACAGTCTACATGGAGCTGAGCAGCCTGAGATCTGAGGACACGGCCGTATACTACTGTGCGAGAGGAACCTCCCTAACTGGGGATTTTGAGTTTTCTATATCGGTCGACGAT…	IGHV1-69*13	IGHD7-27*01	IGHJ6*03	ARGTSLTGDFEFSISVDDYYDYFYMDV	27	6.16246	ATGGCCGGCTTCCCTCTCCTCCTCACCCTCCTCACTCACTGTGCAGGGTCCTGGGCCCAGTCTGTGCTGACTCAGCCACCCTCAGCGTCTGGGACCCCCGGGCAGAGGGTCACCATCTCTTGTTCTGGAAGCACCTCCAACATCGGAAGTCATCATGTATACTGGTACCAGGAGGTCCCAGGAACGGCCCCCAAACTCCTCATCTATAGGAATAATCAGCGGCCCTCAGGGGTCCCTGACCGATTCTCTGGCTCCAAGTCTGGCGCCTCAGCCTCCCTGGCCATCAGTGGGCTCCGGTCCGAGGATGAGGCTGATTATTTCTGTGCAGCATGGGATGACACCCTGAGTGGTTCCTTGGTGTTCGGCGGAGGGACCAAGCTGACCGTCCTAGG	LV1-47	LJ3	AAWDDTLSGSLV	12	2.43902
c31926	201441	NN	ATGGACTGGACCTGGAGGTTCCTCTTTGTGGTGGCAGCAGCTACAGGTGTCCAGTCCCAGGGCCAGCTGGTGCAGTCTGGGGCTGAGGTGAAGAAGCCTGGGTCCTCAGTGAAGGTCTCCTGCAAGGCTTCTGGAGGCACCCTCACCAACTATGGTATCAGCTGGGTGCGACAGGCCCCTGGACAAGGGCTTGAGTGGATGGGAGGGATCATCCCAATTCTTCGTACAACAAACTACGCACAGAACTTCCAGGGCAGAGTCACCATAACCGCGGACGAATCCACGGCCACAGTCTACATGGAGCTGAGCAGCCTGAGATCTGAGGACACGGCCGTATACTACTGTGCGAGAGGAACCTCCCTAACTGGGGATTTTGAGTTTTCTATATCGGTCGACGAT…	IGHV1-69*13	IGHD7-27*01	IGHJ6*03	ARGTSLTGDFEFSISVDDYYDYFYMDV	27	6.16246	ATGGCCGGCTTCCCTCTCCTCCTCACCCTCCTCACTCACTGTGCAGGGTCCTGGGCCCAGTCTGTGCTGACTCAGCCACCCTCAGCGTCTGGGACCCCCGGGCAGAGGGTCACCATCTCTTGTTCTGGAAGCACCTCCAACATCGGAAGTCATCATGTATACTGGTACCAGGAGGTCCCAGGAACGGCCCCCAAACTCCTCATCTATAGGAATAATCAGCGGCCCTCAGGGGTCCCTGACCGATTCTCTGGCTCCAAGTCTGGCGCCTCAGCCTCCCTGGCCATCAGTGGGCTCCGGTCCGAGGATGAGGCTGATTATTTCTGTGCAGCATGGGATGACACCCTGAGTGGTTCCTTGGTGTTCGGCGGAGGGACCAAGCTGACCGTCCTAGG	LV1-47	LJ3	AAWDDTLSGSLV	12	2.43902
c31873	201441	NN	ATGGACTGGACCTGGAGGTTCCTCTTTGTGGTGGCAGCAGCTACAGGTGTCCAGTCCCAGGGCCAGCTGGTGCAGTCTGGGGCTGAGGTGAAGAAGCCTGGGTCCTCAGTGAAGGTCTCCTGCAAGGCTTCTGGAGGCACCCTCACCAACTATGGTATCAGCTGGGTGCGACAGGCCCCTGGACAAGGGCTTGAGTGGATGGGAGGGATCATCCCAATTCTTCGTACAACAAACTACGCACAGAACTTCCAGGGCAGAGTCACCATAACCGCGGACGAATCCACGGCCACAGTCTACATGGAGCTGAGCAGCCTGAGATCTGAGGACACGGCCGTATACTACTGTGCGAGAGGAACCTCCCTAACTGGGGATTTTGAGTTTTCTATATCGGTCGACGAT…	IGHV1-69*13	IGHD7-27*01	IGHJ6*03	ARGTSLTGDFEFSISVDDYYDYFYMDV	27	6.16246	ATGGCCGGCTTCCCTCTCCTCCTCACCCTCCTCACTCACTGTGCAGGGTCCTGGGCCCAGTCTGTGCTGACTCAGCCACCCTCAGCGTCTGGGACCCCCGGGCAGAGGGTCACCATCTCTTGTTCTGGAAGCACCTCCAACATCGGAAGTCATCATGTATACTGGTACCAGGAGGTCCCAGGAACGGCCCCCAAACTCCTCATCTATAGGAATAATCAGCGGCCCTCAGGGGTCCCTGACCGATTCTCTGGCTCCAAGTCTGGCGCCTCAGCCTCCCTGGCCATCAGTGGGCTCCGGTCCGAGGATGAGGCTGATTATTTCTGTGCAGCATGGGATGACACCCTGAGTGGTTCCTTGGTGTTCGGCGGAGGGACCAAGCTGACCGTCCTAGG	LV1-47	LJ3	AAWDDTLSGSLV	12	2.43902
c31871	201441	NN	ATGGAGTTTGGGCTGACCTGGGCTTTCCTCGTTGCTCTTTTAAGAGGTGTCCAGTGTCAGCTGCAGTTGGTGGAGTCTGGGGGAGGCGTGGTCCAACCTGGGAGGTCCCTGAGACTCTCCTGTGTAGCCTCTGGATTCAACTTCAGTCGTTCTCAAATGCAGTGGGTCCGCCAGGCTCCAGGCAAGGGGCTGGAGTGGGTGACTGTTATAACATATGATGGAAAGAACACATACGACGCAGACTCCGTGAAGGGCCGATTCACCATTTCCAGAGACAATTCCAAGAACACGCTGTATTTGCAAATGAATAACTTGAGACCTGAGGACACGGCTCTTTATTACTGTGCGAGTGGTTCCTACTTTGAAAACTGGGGCCAGGGAACCCTGGTCACCGTCTCC…	IGHV3-30*04	IGHD3-10*01	IGHJ4*02	ASGSYFEN	8	8.84956	ATGGAAGCCCCAGCGCAGCTTCTCTTCCTCCTGCTACTCTGGCTCCCAGATACCGCTGGAGAAATAGTGATGACGCAGTCTCCAGCCACCCTGTCTGTGTCTCCAGGGGAAAGAGCCACCCTCTCCTGCAGGGCCAGTCAGACTATTAGCAGCAAGTTAGCCTGGTACCAGCAGAAACGTGGCCAGGCTCCCAGGCTCCTCATGTATGATGCATCCACCAGGGCCACTGGTATCCCAGCCAGGTTCAGTGGCGGAGGGTCGGGGACAGAGTTCACTCTCACCATCAGCAGCCTGCAGTCTGAAGATTTTGCAGTTTATTATTGTCAGCAGTATAATAGGTGGCCGTACAGTTTTGGCCAGGGGACCAAGCTGGACATCAAGCG	KV3-15	KJ2	QQYNRWPYS	9	4.08805
c31866	201441	NN	ATGGAGTTTGGGCTGACCTGGGCTTTCCTCGTTGCTCTTTTAAGAGGTGTCCAGTGTCAGCTGCAGTTGGTGGAGTCTGGGGGAGGCGTGGTCCAACCTGGGAGGTCCCTGAGACTCTCCTGTGTAGCCTCTGGATTCAACTTCAGTCGTTCTCAAATGCAGTGGGTCCGCCAGGCTCCAGGCAAGGGGCTGGAGTGGGTGACTGTTATAACATATGATGGAAAGAACACATACGACGCAGACTCCGTGAAGGGCCGATTCACCATTTCCAGAGACAATTCCAAGAACACGCTGTATTTGCAAATGAATAACTTGAGACCTGAGGACACGGCTCTTTATTACTGTGCGAGTGGTTCCTACTTTGAAAACTGGGGCCAGGGAACCCTGGTCACCGTCTCC…	IGHV3-30*04	IGHD3-10*01	IGHJ4*02	ASGSYFEN	8	8.84956	ATGGAAGCCCCAGCGCAGCTTCTCTTCCTCCTGCTACTCTGGCTCCCAGATACCGCTGGAGAAATAGTGATGACGCAGTCTCCAGCCACCCTGTCTGTGTCTCCAGGGGAAAGAGCCACCCTCTCCTGCAGGGCCAGTCAGACTATTAGCAGCAAGTTAGCCTGGTACCAGCAGAAACGTGGCCAGGCTCCCAGGCTCCTCATGTATGATGCATCCACCAGGGCCACTGGTATCCCAGCCAGGTTCAGTGGCGGAGGGTCGGGGACAGAGTTCACTCTCACCATCAGCAGCCTGCAGTCTGAAGATTTTGCAGTTTATTATTGTCAGCAGTATAATAGGTGGCCGTACAGTTTTGGCCAGGGGACCAAGCTGGACATCAAGCG	KV3-15	KJ2	QQYNRWPYS	9	4.08805
c31870	201441	NN	ATGGAGTTTGGGCTGACCTGGGCTTTCCTCGTTGCTCTTTTAAGAGGTGTCCAGTGTCAGCTGCAGTTGGTGGAGTCTGGGGGAGGCGTGGTCCAACCTGGGAGGTCCCTGAGACTCTCCTGTGTAGCCTCTGGATTCAACTTCAGTCGTTCTCAAATGCAGTGGGTCCGCCAGGCTCCAGGCAAGGGGCTGGAGTGGGTGACTGTTATAACATATGATGGAAAGAACACATACGACGCAGACTCCGTGAAGGGCCGATTCACCATTTCCAGAGACAATTCCAAGAACACGCTGTATTTGCAAATGAATAACTTGAGACCTGAGGACACGGCTCTTTATTACTGTGCGAGTGGTTCCTACTTTGAAAACTGGGGCCAGGGAACCCTGGTCACCGTCTCC…	IGHV3-30*04	IGHD3-10*01	IGHJ4*02	ASGSYFEN	8	8.84956	ATGGAAGCCCCAGCGCAGCTTCTCTTCCTCCTGCTACTCTGGCTCCCAGATACCGCTGGAGAAATAGTGATGACGCAGTCTCCAGCCACCCTGTCTGTGTCTCCAGGGGAAAGAGCCACCCTCTCCTGCAGGGCCAGTCAGACTATTAGCAGCAAGTTAGCCTGGTACCAGCAGAAACGTGGCCAGGCTCCCAGGCTCCTCATGTATGATGCATCCACCAGGGCCACTGGTATCCCAGCCAGGTTCAGTGGCGGAGGGTCGGGGACAGAGTTCACTCTCACCATCAGCAGCCTGCAGTCTGAAGATTTTGCAGTTTATTATTGTCAGCAGTATAATAGGTGGCCGTACAGTTTTGGCCAGGGGACCAAGCTGGACATCAAGCG	KV3-15	KJ2	QQYNRWPYS	9	4.08805
c31923	201441	NN	ATGGAGTTTGGGCTGACCTGGGCTTTCCTCGTTGCTCTTTTAAGAGGTGTCCAGTGTCAGCTGCAGTTGGTGGAGTCTGGGGGAGGCGTGGTCCAACCTGGGAGGTCCCTGAGACTCTCCTGTGTAGCCTCTGGATTCAACTTCAGTCGTTCTCAAATGCAGTGGGTCCGCCAGGCTCCAGGCAAGGGGCTGGAGTGGGTGACTGTTATAACATATGATGGAAAGAACACATACGACGCAGACTCCGTGAAGGGCCGATTCACCATTTCCAGAGACAATTCCAAGAACACGCTGTATTTGCAAATGAATAACTTGAGACCTGAGGACACGGCTCTTTATTACTGTGCGAGTGGTTCCTACTTTGAAAACTGGGGCCAGGGAACCCTGGTCACCGTCTCC…	IGHV3-30*04	IGHD3-10*01	IGHJ4*02	ASGSYFEN	8	8.84956	ATGGAAGCCCCAGCGCAGCTTCTCTTCCTCCTGCTACTCTGGCTCCCAGATACCGCTGGAGAAATAGTGATGACGCAGTCTCCAGCCACCCTGTCTGTGTCTCCAGGGGAAAGAGCCACCCTCTCCTGCAGGGCCAGTCAGACTATTAGCAGCAAGTTAGCCTGGTACCAGCAGAAACGTGGCCAGGCTCCCAGGCTCCTCATGTATGATGCATCCACCAGGGCCACTGGTATCCCAGCCAGGTTCAGTGGCGGAGGGTCGGGGACAGAGTTCACTCTCACCATCAGCAGCCTGCAGTCTGAAGATTTTGCAGTTTATTATTGTCAGCAGTATAATAGGTGGCCGTACAGTTTTGGCCAGGGGACCAAGCTGGACATCAAGCG	KV3-15	KJ2	QQYNRWPYS	9	4.08805
c31909	201441	NN	ATGGAACTGGGGCTCCGCTGGGTTTTCCTTGTTGCTATTTTAGAAGGTGTCCAGTGTGAGGTGCAGCTGGCGGAGTCTGGGGGAGGCCTGGTCAAGCCTGGGGGGTCCCTGAGACTCTCCTGCGAAGCCTCTGGACTCACCTTCAGTGATTATGGCATGAGTTGGGTCCGCCAGGCTCCAGGGAAGGGGCTGGAGTGGGTCTCATCCATTAGTTCTGGTAGCAGATACATCTACTACGCAGACTCCATAAAGGGCCGATTCACCATCTCCAGAGACAACGCCAAGAACTCACTGTATCTGCAAATGGACAGCCTGAGAGCCGAGGACACGGCTGTGTATTTCTGTACGAGAGATTCAACTTCGGCTAGAGTTCGGTACTTCGATCTCTGGGGCCGTGGC…	IGHV3-21*01	IGHD6-25*01	IGHJ2*01	TRDSTSARVRYFDL	14	7.28863	ATGGACATGAGGGTCCCCGCTCAGCTCCTGGGGCTCCTGCTACTCTGGCTCCGAGGTGCCAGATGTGACATCCAGATGACCCAGTCTCCATCCTCCCTGGCTGCATCTGTAGGAGACAGAGTCACCATCACTTGCCGGGCAAGTCAGAGCATTAGCAAGTATTTAAATTGGTATCAGCAGAAACCTGGGAAAGTCCCTAAGCTCCTGATCTATGCTGCATCCAGTTTGCAAAGTGGGGTCCCATCAAGGTTCAGTGGCAGTGGATCTGGGACAGATTTCACTCTCACCATCAGCAGTCTGCAACCTGAAGATTTTGCAACTTACTACTGTCAACAAAGTTACGGAACCCCTCTCACTTTCGGCCCTGGGACCAAAGTGGATGTCAAACG	KV1-39	KJ3	QQSYGTPLT	9	2.80374
c31908	201441	NN	ATGGAACTGGGGCTCCGCTGGGTTTTCCTTGTTGCTATTTTAGAAGGTGTCCAGTGTGAGGTGCAGCTGGCGGAGTCTGGGGGAGGCCTGGTCAAGCCTGGGGGGTCCCTGAGACTCTCCTGCGAAGCCTCTGGACTCACCTTCAGTGATTATGGCATGAGTTGGGTCCGCCAGGCTCCAGGGAAGGGGCTGGAGTGGGTCTCATCCATTAGTTCTGGTAGCAGATACATCTACTACGCAGACTCCATAAAGGGCCGATTCACCATCTCCAGAGACAACGCCAAGAACTCACTGTATCTGCAAATGGACAGCCTGAGAGCCGAGGACACGGCTGTGTATTTCTGTACGAGAGATTCAACTTCGGCTAGAGTTCGGTACTTCGATCTCTGGGGCCGTGGC…	IGHV3-21*01	IGHD6-25*01	IGHJ2*01	TRDSTSARVRYFDL	14	7.28863	ATGGACATGAGGGTCCCCGCTCAGCTCCTGGGGCTCCTGCTACTCTGGCTCCGAGGTGCCAGATGTGACATCCAGATGACCCAGTCTCCATCCTCCCTGGCTGCATCTGTAGGAGACAGAGTCACCATCACTTGCCGGGCAAGTCAGAGCATTAGCAAGTATTTAAATTGGTATCAGCAGAAACCTGGGAAAGTCCCTAAGCTCCTGATCTATGCTGCATCCAGTTTGCAAAGTGGGGTCCCATCAAGGTTCAGTGGCAGTGGATCTGGGACAGATTTCACTCTCACCATCAGCAGTCTGCAACCTGAAGATTTTGCAACTTACTACTGTCAACAAAGTTACGGAACCCCTCTCACTTTCGGCCCTGGGACCAAAGTGGATGTCAAACG	KV1-39	KJ3	QQSYGTPLT	9	2.80374
c31861	201441	NN	ATGGAACTGGGGCTCCGCTGGGTTTTCCTTGTTGCTATTTTAGAAGGTGTCCAGTGTGAGGTGCAGCTGGCGGAGTCTGGGGGAGGCCTGGTCAAGCCTGGGGGGTCCCTGAGACTCTCCTGCGAAGCCTCTGGACTCACCTTCAGTGATTATGGCATGAGTTGGGTCCGCCAGGCTCCAGGGAAGGGGCTGGAGTGGGTCTCATCCATTAGTTCTGGTAGCAGATACATCTACTACGCAGACTCCATAAAGGGCCGATTCACCATCTCCAGAGACAACGCCAAGAACTCACTGTATCTGCAAATGGACAGCCTGAGAGCCGAGGACACGGCTGTGTATTTCTGTACGAGAGATTCAACTTCGGCTAGAGTTCGGTACTTCGATCTCTGGGGCCGTGGC…	IGHV3-21*01	IGHD6-25*01	IGHJ2*01	TRDSTSARVRYFDL	14	7.28863	ATGGACATGAGGGTCCCCGCTCAGCTCCTGGGGCTCCTGCTACTCTGGCTCCGAGGTGCCAGATGTGACATCCAGATGACCCAGTCTCCATCCTCCCTGGCTGCATCTGTAGGAGACAGAGTCACCATCACTTGCCGGGCAAGTCAGAGCATTAGCAAGTATTTAAATTGGTATCAGCAGAAACCTGGGAAAGTCCCTAAGCTCCTGATCTATGCTGCATCCAGTTTGCAAAGTGGGGTCCCATCAAGGTTCAGTGGCAGTGGATCTGGGACAGATTTCACTCTCACCATCAGCAGTCTGCAACCTGAAGATTTTGCAACTTACTACTGTCAACAAAGTTACGGAACCCCTCTCACTTTCGGCCCTGGGACCAAAGTGGATGTCAAACG	KV1-39	KJ3	QQSYGTPLT	9	2.80374
c31921	201441	NN	ATGGAACTGGGGCTCCGCTGGGTTTTCCTTGTTGCTATTTTAGAAGGTGTCCAGTGTGAGGTGCAGCTGGCGGAGTCTGGGGGAGGCCTGGTCAAGCCTGGGGGGTCCCTGAGACTCTCCTGCGAAGCCTCTGGACTCACCTTCAGTGATTATGGCATGAGTTGGGTCCGCCAGGCTCCAGGGAAGGGGCTGGAGTGGGTCTCATCCATTAGTTCTGGTAGCAGATACATCTACTACGCAGACTCCATAAAGGGCCGATTCACCATCTCCAGAGACAACGCCAAGAACTCACTGTATCTGCAAATGGACAGCCTGAGAGCCGAGGACACGGCTGTGTATTTCTGTACGAGAGATTCAACTTCGGCTAGAGTTCGGTACTTCGATCTCTGGGGCCGTGGC…	IGHV3-21*01	IGHD6-25*01	IGHJ2*01	TRDSTSARVRYFDL	14	7.28863	ATGGACATGAGGGTCCCCGCTCAGCTCCTGGGGCTCCTGCTACTCTGGCTCCGAGGTGCCAGATGTGACATCCAGATGACCCAGTCTCCATCCTCCCTGGCTGCATCTGTAGGAGACAGAGTCACCATCACTTGCCGGGCAAGTCAGAGCATTAGCAAGTATTTAAATTGGTATCAGCAGAAACCTGGGAAAGTCCCTAAGCTCCTGATCTATGCTGCATCCAGTTTGCAAAGTGGGGTCCCATCAAGGTTCAGTGGCAGTGGATCTGGGACAGATTTCACTCTCACCATCAGCAGTCTGCAACCTGAAGATTTTGCAACTTACTACTGTCAACAAAGTTACGGAACCCCTCTCACTTTCGGCCCTGGGACCAAAGTGGATGTCAAACG	KV1-39	KJ3	QQSYGTPLT	9	2.80374
c31920	201441	NN	ATGGAACTGGGGCTCCGCTGGGTTTTCCTTGTTGCTATTTTAGAAGGTGTCCAGTGTGAGGTGCAGCTGGCGGAGTCTGGGGGAGGCCTGGTCAAGCCTGGGGGGTCCCTGAGACTCTCCTGCGAAGCCTCTGGACTCACCTTCAGTGATTATGGCATGAGTTGGGTCCGCCAGGCTCCAGGGAAGGGGCTGGAGTGGGTCTCATCCATTAGTTCTGGTAGCAGATACATCTACTACGCAGACTCCATAAAGGGCCGATTCACCATCTCCAGAGACAACGCCAAGAACTCACTGTATCTGCAAATGGACAGCCTGAGAGCCGAGGACACGGCTGTGTATTTCTGTACGAGAGATTCAACTTCGGCTAGAGTTCGGTACTTCGATCTCTGGGGCCGTGGC…	IGHV3-21*01	IGHD6-25*01	IGHJ2*01	TRDSTSARVRYFDL	14	7.28863	ATGGACATGAGGGTCCCCGCTCAGCTCCTGGGGCTCCTGCTACTCTGGCTCCGAGGTGCCAGATGTGACATCCAGATGACCCAGTCTCCATCCTCCCTGGCTGCATCTGTAGGAGACAGAGTCACCATCACTTGCCGGGCAAGTCAGAGCATTAGCAAGTATTTAAATTGGTATCAGCAGAAACCTGGGAAAGTCCCTAAGCTCCTGATCTATGCTGCATCCAGTTTGCAAAGTGGGGTCCCATCAAGGTTCAGTGGCAGTGGATCTGGGACAGATTTCACTCTCACCATCAGCAGTCTGCAACCTGAAGATTTTGCAACTTACTACTGTCAACAAAGTTACGGAACCCCTCTCACTTTCGGCCCTGGGACCAAAGTGGATGTCAAACG	KV1-39	KJ3	QQSYGTPLT	9	2.80374
c31885	201441	NN	ATGGAACTGGGGCTCCGCTGGGTTTTCCTTGTTGCTATTTTAGAAGGTGTCCAGTGTGAGGTGCAGCTGGCGGAGTCTGGGGGAGGCCTGGTCAAGCCTGGGGGGTCCCTGAGACTCTCCTGCGAAGCCTCTGGACTCACCTTCAGTGATTATGGCATGAGTTGGGTCCGCCAGGCTCCAGGGAAGGGGCTGGAGTGGGTCTCATCCATTAGTTCTGGTAGCAGATACATCTACTACGCAGACTCCATAAAGGGCCGATTCACCATCTCCAGAGACAACGCCAAGAACTCACTGTATCTGCAAATGGACAGCCTGAGAGCCGAGGACACGGCTGTGTATTTCTGTACGAGAGATTCAACTTCGGCTAGAGTTCGGTACTTCGATCTCTGGGGCCGTGGC…	IGHV3-21*01	IGHD6-25*01	IGHJ2*01	TRDSTSARVRYFDL	14	7.28863	ATGGACATGAGGGTCCCCGCTCAGCTCCTGGGGCTCCTGCTACTCTGGCTCCGAGGTGCCAGATGTGACATCCAGATGACCCAGTCTCCATCCTCCCTGGCTGCATCTGTAGGAGACAGAGTCACCATCACTTGCCGGGCAAGTCAGAGCATTAGCAAGTATTTAAATTGGTATCAGCAGAAACCTGGGAAAGTCCCTAAGCTCCTGATCTATGCTGCATCCAGTTTGCAAAGTGGGGTCCCATCAAGGTTCAGTGGCAGTGGATCTGGGACAGATTTCACTCTCACCATCAGCAGTCTGCAACCTGAAGATTTTGCAACTTACTACTGTCAACAAAGTTACGGAACCCCTCTCACTTTCGGCCCTGGGACCAAAGTGGATGTCAAACG	KV1-39	KJ3	QQSYGTPLT	9	2.80374
c31865	201441	NN	ATGGACTGCACCTGGAGGATCCTCTTCTTGGTGGCAGCAGCTACAGGCACCCACGCCCAGGTCCAGCTGGAACAGTCTGGGGCTGAGGTGACGAAACCTGGGGCCTCAGTGAAGGTCTCCTGCAAGGTATCCGGGAACATTGTCACTGAATTATACATCCACTGGGTGCGACAGACTCCTGGAAAAGGCCTTGAGTGGATGGGAGGTCTTGATCCTGAAGATGGTGAGATTGTCTATGCAGAAAAATTCCACGGCAGAGTCACCATGACCGAGGACAAATCCAGAAACACAGCCTATATGGAGGTGACCAGCCTGAGATCTGAGGACACGGCCATTTATTTCTGTGCACACGCTCACTATGGTGACTGGACATACTACTTTGACTACTGGGGCCAGGGA…	IGHV1-24*01	IGHD2-21*02	IGHJ4*02	AHAHYGDWTYYFDY	14	9.76331	ATGGCCTGGGCTCTGCTGCTCCTCACTCTCCTCACTCAGGACACAGGGTCCTGGGCCCAGTCTGCCCTGACTCAGCCTGCCTCCGTATCTGGGTCTCGTGGACAGTCGATCACCATCTCCTGCACTGGACCCAGCACTGATGTTGGGAATTATAACCTTGTCTCCTGGTACCAACAGCGCCCAGGCAAAGCCCCCAAGCTCATGATTTTTGAGGGCAGTAAGCGGCCCTCAGGGGTTTCTGATCGCTTCTCTGGCTACCAGTCTGGCAACACGGCCTCCCTGAGAATCTCTGGGCTCCAGGCTGAAGACGAGGCTGATTATTACTGCTCCTCATATGTAGGGATTAGCACCTTGGACTTCGGAACTGGGACCAAGGTCACCGTCCTAGG	LV2-23	LJ1	SSYVGISTLD	10	5.50459
c31898	201441	NN	ATGGACTGCACCTGGAGGATCCTCTTCTTGGTGGCAGCAGCTACAGGCACCCACGCCCAGGTCCAGCTGGAACAGTCTGGGGCTGAGGTGACGAAACCTGGGGCCTCAGTGAAGGTCTCCTGCAAGGTATCCGGGAACATTGTCACTGAATTATACATCCACTGGGTGCGACAGACTCCTGGAAAAGGCCTTGAGTGGATGGGAGGTCTTGATCCTGAAGATGGTGAGATTGTCTATGCAGAAAAATTCCACGGCAGAGTCACCATGACCGAGGACAAATCCAGAAACACAGCCTATATGGAGGTGACCAGCCTGAGATCTGAGGACACGGCCATTTATTTCTGTGCACACGCTCACTATGGTGACTGGACATACTACTTTGACTACTGGGGCCAGGGA…	IGHV1-24*01	IGHD2-21*02	IGHJ4*02	AHAHYGDWTYYFDY	14	9.76331	ATGGCCTGGGCTCTGCTGCTCCTCACTCTCCTCACTCAGGACACAGGGTCCTGGGCCCAGTCTGCCCTGACTCAGCCTGCCTCCGTATCTGGGTCTCGTGGACAGTCGATCACCATCTCCTGCACTGGACCCAGCACTGATGTTGGGAATTATAACCTTGTCTCCTGGTACCAACAGCGCCCAGGCAAAGCCCCCAAGCTCATGATTTTTGAGGGCAGTAAGCGGCCCTCAGGGGTTTCTGATCGCTTCTCTGGCTACCAGTCTGGCAACACGGCCTCCCTGAGAATCTCTGGGCTCCAGGCTGAAGACGAGGCTGATTATTACTGCTCCTCATATGTAGGGATTAGCACCTTGGACTTCGGAACTGGGACCAAGGTCACCGTCCTAGG	LV2-23	LJ1	SSYVGISTLD	10	5.50459
c31877	201441	NN	ATGGACTGCACCTGGAGGATCCTCTTCTTGGTGGCAGCAGCTACAGGCACCCACGCCCAGGTCCAGCTGGAACAGTCTGGGGCTGAGGTGACGAAACCTGGGGCCTCAGTGAAGGTCTCCTGCAAGGTATCCGGGAACATTGTCACTGAATTATACATCCACTGGGTGCGACAGACTCCTGGAAAAGGCCTTGAGTGGATGGGAGGTCTTGATCCTGAAGATGGTGAGATTGTCTATGCAGAAAAATTCCACGGCAGAGTCACCATGACCGAGGACAAATCCAGAAACACAGCCTATATGGAGGTGACCAGCCTGAGATCTGAGGACACGGCCATTTATTTCTGTGCACACGCTCACTATGGTGACTGGACATACTACTTTGACTACTGGGGCCAGGGA…	IGHV1-24*01	IGHD2-21*02	IGHJ4*02	AHAHYGDWTYYFDY	14	9.76331	ATGGCCTGGGCTCTGCTGCTCCTCACTCTCCTCACTCAGGACACAGGGTCCTGGGCCCAGTCTGCCCTGACTCAGCCTGCCTCCGTATCTGGGTCTCGTGGACAGTCGATCACCATCTCCTGCACTGGACCCAGCACTGATGTTGGGAATTATAACCTTGTCTCCTGGTACCAACAGCGCCCAGGCAAAGCCCCCAAGCTCATGATTTTTGAGGGCAGTAAGCGGCCCTCAGGGGTTTCTGATCGCTTCTCTGGCTACCAGTCTGGCAACACGGCCTCCCTGAGAATCTCTGGGCTCCAGGCTGAAGACGAGGCTGATTATTACTGCTCCTCATATGTAGGGATTAGCACCTTGGACTTCGGAACTGGGACCAAGGTCACCGTCCTAGG	LV2-23	LJ1	SSYVGISTLD	10	5.50459
c31875	201441	NN	ATGGACTGCACCTGGAGGATCCTCTTCTTGGTGGCAGCAGCTACAGGCACCCACGCCCAGGTCCAGCTGGAACAGTCTGGGGCTGAGGTGACGAAACCTGGGGCCTCAGTGAAGGTCTCCTGCAAGGTATCCGGGAACATTGTCACTGAATTATACATCCACTGGGTGCGACAGACTCCTGGAAAAGGCCTTGAGTGGATGGGAGGTCTTGATCCTGAAGATGGTGAGATTGTCTATGCAGAAAAATTCCACGGCAGAGTCACCATGACCGAGGACAAATCCAGAAACACAGCCTATATGGAGGTGACCAGCCTGAGATCTGAGGACACGGCCATTTATTTCTGTGCACACGCTCACTATGGTGACTGGACATACTACTTTGACTACTGGGGCCAGGGA…	IGHV1-24*01	IGHD2-21*02	IGHJ4*02	AHAHYGDWTYYFDY	14	9.76331	ATGGCCTGGGCTCTGCTGCTCCTCACTCTCCTCACTCAGGACACAGGGTCCTGGGCCCAGTCTGCCCTGACTCAGCCTGCCTCCGTATCTGGGTCTCGTGGACAGTCGATCACCATCTCCTGCACTGGACCCAGCACTGATGTTGGGAATTATAACCTTGTCTCCTGGTACCAACAGCGCCCAGGCAAAGCCCCCAAGCTCATGATTTTTGAGGGCAGTAAGCGGCCCTCAGGGGTTTCTGATCGCTTCTCTGGCTACCAGTCTGGCAACACGGCCTCCCTGAGAATCTCTGGGCTCCAGGCTGAAGACGAGGCTGATTATTACTGCTCCTCATATGTAGGGATTAGCACCTTGGACTTCGGAACTGGGACCAAGGTCACCGTCCTAGG	LV2-23	LJ1	SSYVGISTLD	10	5.50459
c31867	201441	NN	ATGGACTGCACCTGGAGGATCCTCTTCTTGGTGGCAGCAGCTACAGGCACCCACGCCCAGGTCCAGCTGGAACAGTCTGGGGCTGAGGTGACGAAACCTGGGGCCTCAGTGAAGGTCTCCTGCAAGGTATCCGGGAACATTGTCACTGAATTATACATCCACTGGGTGCGACAGACTCCTGGAAAAGGCCTTGAGTGGATGGGAGGTCTTGATCCTGAAGATGGTGAGATTGTCTATGCAGAAAAATTCCACGGCAGAGTCACCATGACCGAGGACAAATCCAGAAACACAGCCTATATGGAGGTGACCAGCCTGAGATCTGAGGACACGGCCATTTATTTCTGTGCACACGCTCACTATGGTGACTGGACATACTACTTTGACTACTGGGGCCAGGGA…	IGHV1-24*01	IGHD2-21*02	IGHJ4*02	AHAHYGDWTYYFDY	14	9.76331	ATGGCCTGGGCTCTGCTGCTCCTCACTCTCCTCACTCAGGACACAGGGTCCTGGGCCCAGTCTGCCCTGACTCAGCCTGCCTCCGTATCTGGGTCTCGTGGACAGTCGATCACCATCTCCTGCACTGGACCCAGCACTGATGTTGGGAATTATAACCTTGTCTCCTGGTACCAACAGCGCCCAGGCAAAGCCCCCAAGCTCATGATTTTTGAGGGCAGTAAGCGGCCCTCAGGGGTTTCTGATCGCTTCTCTGGCTACCAGTCTGGCAACACGGCCTCCCTGAGAATCTCTGGGCTCCAGGCTGAAGACGAGGCTGATTATTACTGCTCCTCATATGTAGGGATTAGCACCTTGGACTTCGGAACTGGGACCAAGGTCACCGTCCTAGG	LV2-23	LJ1	SSYVGISTLD	10	5.50459
c31919	201441	NN	ATGGACTGCACCTGGAGGATCCTCTTCTTGGTGGCAGCAGCTACAGGCACCCACGCCCAGGTCCAGCTGGAACAGTCTGGGGCTGAGGTGACGAAACCTGGGGCCTCAGTGAAGGTCTCCTGCAAGGTATCCGGGAACATTGTCACTGAATTATACATCCACTGGGTGCGACAGACTCCTGGAAAAGGCCTTGAGTGGATGGGAGGTCTTGATCCTGAAGATGGTGAGATTGTCTATGCAGAAAAATTCCACGGCAGAGTCACCATGACCGAGGACAAATCCAGAAACACAGCCTATATGGAGGTGACCAGCCTGAGATCTGAGGACACGGCCATTTATTTCTGTGCACACGCTCACTATGGTGACTGGACATACTACTTTGACTACTGGGGCCAGGGA…	IGHV1-24*01	IGHD2-21*02	IGHJ4*02	AHAHYGDWTYYFDY	14	9.76331	ATGGCCTGGGCTCTGCTGCTCCTCACTCTCCTCACTCAGGACACAGGGTCCTGGGCCCAGTCTGCCCTGACTCAGCCTGCCTCCGTATCTGGGTCTCGTGGACAGTCGATCACCATCTCCTGCACTGGACCCAGCACTGATGTTGGGAATTATAACCTTGTCTCCTGGTACCAACAGCGCCCAGGCAAAGCCCCCAAGCTCATGATTTTTGAGGGCAGTAAGCGGCCCTCAGGGGTTTCTGATCGCTTCTCTGGCTACCAGTCTGGCAACACGGCCTCCCTGAGAATCTCTGGGCTCCAGGCTGAAGACGAGGCTGATTATTACTGCTCCTCATATGTAGGGATTAGCACCTTGGACTTCGGAACTGGGACCAAGGTCACCGTCCTAGG	LV2-23	LJ1	SSYVGISTLD	10	5.50459
c31886	201441	NN	ATGGACTGCACCTGGAGGATCCTCTTCTTGGTGGCAGCAGCTACAGGCACCCACGCCCAGGTCCAGCTGGAACAGTCTGGGGCTGAGGTGACGAAACCTGGGGCCTCAGTGAAGGTCTCCTGCAAGGTATCCGGGAACATTGTCACTGAATTATACATCCACTGGGTGCGACAGACTCCTGGAAAAGGCCTTGAGTGGATGGGAGGTCTTGATCCTGAAGATGGTGAGATTGTCTATGCAGAAAAATTCCACGGCAGAGTCACCATGACCGAGGACAAATCCAGAAACACAGCCTATATGGAGGTGACCAGCCTGAGATCTGAGGACACGGCCATTTATTTCTGTGCACACGCTCACTATGGTGACTGGACATACTACTTTGACTACTGGGGCCAGGGA…	IGHV1-24*01	IGHD2-21*02	IGHJ4*02	AHAHYGDWTYYFDY	14	9.76331	ATGGCCTGGGCTCTGCTGCTCCTCACTCTCCTCACTCAGGACACAGGGTCCTGGGCCCAGTCTGCCCTGACTCAGCCTGCCTCCGTATCTGGGTCTCGTGGACAGTCGATCACCATCTCCTGCACTGGACCCAGCACTGATGTTGGGAATTATAACCTTGTCTCCTGGTACCAACAGCGCCCAGGCAAAGCCCCCAAGCTCATGATTTTTGAGGGCAGTAAGCGGCCCTCAGGGGTTTCTGATCGCTTCTCTGGCTACCAGTCTGGCAACACGGCCTCCCTGAGAATCTCTGGGCTCCAGGCTGAAGACGAGGCTGATTATTACTGCTCCTCATATGTAGGGATTAGCACCTTGGACTTCGGAACTGGGACCAAGGTCACCGTCCTAGG	LV2-23	LJ1	SSYVGISTLD	10	5.50459
c31862	201441	NN	ATGGACTGCACCTGGAGGATCCTCTTCTTGGTGGCAGCAGCTACAGGCACCCACGCCCAGGTCCAGCTGGAACAGTCTGGGGCTGAGGTGACGAAACCTGGGGCCTCAGTGAAGGTCTCCTGCAAGGTATCCGGGAACATTGTCACTGAATTATACATCCACTGGGTGCGACAGACTCCTGGAAAAGGCCTTGAGTGGATGGGAGGTCTTGATCCTGAAGATGGTGAGATTGTCTATGCAGAAAAATTCCACGGCAGAGTCACCATGACCGAGGACAAATCCAGAAACACAGCCTATATGGAGGTGACCAGCCTGAGATCTGAGGACACGGCCATTTATTTCTGTGCACACGCTCACTATGGTGACTGGACATACTACTTTGACTACTGGGGCCAGGGA…	IGHV1-24*01	IGHD2-21*02	IGHJ4*02	AHAHYGDWTYYFDY	14	9.76331	ATGGCCTGGGCTCTGCTGCTCCTCACTCTCCTCACTCAGGACACAGGGTCCTGGGCCCAGTCTGCCCTGACTCAGCCTGCCTCCGTATCTGGGTCTCGTGGACAGTCGATCACCATCTCCTGCACTGGACCCAGCACTGATGTTGGGAATTATAACCTTGTCTCCTGGTACCAACAGCGCCCAGGCAAAGCCCCCAAGCTCATGATTTTTGAGGGCAGTAAGCGGCCCTCAGGGGTTTCTGATCGCTTCTCTGGCTACCAGTCTGGCAACACGGCCTCCCTGAGAATCTCTGGGCTCCAGGCTGAAGACGAGGCTGATTATTACTGCTCCTCATATGTAGGGATTAGCACCTTGGACTTCGGAACTGGGACCAAGGTCACCGTCCTAGG	LV2-23	LJ1	SSYVGISTLD	10	5.50459
c31891	201441	NN	ATGGACTGCACCTGGAGGATCCTCTTCTTGGTGGCAGCAGCTACAGGCACCCACGCCCAGGTCCAGCTGGAACAGTCTGGGGCTGAGGTGACGAAACCTGGGGCCTCAGTGAAGGTCTCCTGCAAGGTATCCGGGAACATTGTCACTGAATTATACATCCACTGGGTGCGACAGACTCCTGGAAAAGGCCTTGAGTGGATGGGAGGTCTTGATCCTGAAGATGGTGAGATTGTCTATGCAGAAAAATTCCACGGCAGAGTCACCATGACCGAGGACAAATCCAGAAACACAGCCTATATGGAGGTGACCAGCCTGAGATCTGAGGACACGGCCATTTATTTCTGTGCACACGCTCACTATGGTGACTGGACATACTACTTTGACTACTGGGGCCAGGGA…	IGHV1-24*01	IGHD2-21*02	IGHJ4*02	AHAHYGDWTYYFDY	14	9.76331	ATGGCCTGGACCGTTCTCCTCCTCGGCCTCCTGTCTCATTGCACAGGCTCTGTGACCTCCTATGTGTTGACTCAGCCACCCTCGGTGTCAGTGGCCCCAGGAAAAACGGCCAGCATTTCCTGTGGGGGAAACAACATCGGAGGTAAAAGTGTCCACTGGTACCAACAGAAGCCAGGCCAGGCCCCTGCATTGGTCCTCTATGATAATAGCGACCGGCCCACAGGGATCCCTGAGCGATTCTCTGGCTCCAACTCTGGGAACACGGCCACCCTGACCATCAGCAGGGTCGAAGCCGGGGATGAGGCCGACTATTACTGTCAGGTGTTGGATAATAATAGTGTTTCATTTGGCGGAGGGACCAAGCTGACCGTCCTAGG	LV3-21	LJ2	QVLDNNSVS	9	5.48387
c31868	201441	NN	ATGGACTGCACCTGGAGGATCCTCTTCTTGGTGGCAGCAGCTACAGGCACCCACGCCCAGGTCCAGCTGGAACAGTCTGGGGCTGAGGTGACGAAACCTGGGGCCTCAGTGAAGGTCTCCTGCAAGGTATCCGGGAACATTGTCACTGAATTATACATCCACTGGGTGCGACAGACTCCTGGAAAAGGCCTTGAGTGGATGGGAGGTCTTGATCCTGAAGATGGTGAGATTGTCTATGCAGAAAAATTCCACGGCAGAGTCACCATGACCGAGGACAAATCCAGAAACACAGCCTATATGGAGGTGACCAGCCTGAGATCTGAGGACACGGCCATTTATTTCTGTGCACACGCTCACTATGGTGACTGGACATACTACTTTGACTACTGGGGCCAGGGA…	IGHV1-24*01	IGHD2-21*02	IGHJ4*02	AHAHYGDWTYYFDY	14	9.76331	ATGGCCTGGACCGTTCTCCTCCTCGGCCTCCTGTCTCATTGCACAGGCTCTGTGACCTCCTATGTGTTGACTCAGCCACCCTCGGTGTCAGTGGCCCCAGGAAAAACGGCCAGCATTTCCTGTGGGGGAAACAACATCGGAGGTAAAAGTGTCCACTGGTACCAACAGAAGCCAGGCCAGGCCCCTGCATTGGTCCTCTATGATAATAGCGACCGGCCCACAGGGATCCCTGAGCGATTCTCTGGCTCCAACTCTGGGAACACGGCCACCCTGACCATCAGCAGGGTCGAAGCCGGGGATGAGGCCGACTATTACTGTCAGGTGTTGGATAATAATAGTGTTTCATTTGGCGGAGGGACCAAGCTGACCGTCCTAGG	LV3-21	LJ2	QVLDNNSVS	9	5.48387
c31881	201441	NN	ATGGACTGCACCTGGAGGATCCTCTTCTTGGTGGCAGCAGCTACAGGCACCCACGCCCAGGTCCAGCTGGAACAGTCTGGGGCTGAGGTGACGAAACCTGGGGCCTCAGTGAAGGTCTCCTGCAAGGTATCCGGGAACATTGTCACTGAATTATACATCCACTGGGTGCGACAGACTCCTGGAAAAGGCCTTGAGTGGATGGGAGGTCTTGATCCTGAAGATGGTGAGATTGTCTATGCAGAAAAATTCCACGGCAGAGTCACCATGACCGAGGACAAATCCAGAAACACAGCCTATATGGAGGTGACCAGCCTGAGATCTGAGGACACGGCCATTTATTTCTGTGCACACGCTCACTATGGTGACTGGACATACTACTTTGACTACTGGGGCCAGGGA…	IGHV1-24*01	IGHD2-21*02	IGHJ4*02	AHAHYGDWTYYFDY	14	9.76331	ATGGCTTGGACCCCACTCCTCTTCCTCACCCTCCTCCTCCACTGCACAGGGTCTCTCTCCCAGCTTGTGCTGACTCAATCGCCCTCTGCCTCTGCCTCCCTGGGAGCCTCGGTCAAGCTCACCTGCAGTCTGAGTAGTGGATACAGCGGCAACGCCATCGCATGGCATCAGCAGCAGCCAGAGAAGGGCCCTCGATACTTAATGAAACTTAACAATGATGGCAGCCACACCAAGGGGGACGGGATCCCTAATCGCTTCTCAGGCTCCAGCTCTGGGGCTGAGCGCTATCTCACCATCTCCAGCCTCCAGTCTGAAGATGAGGCTGACTATTACTGTCAGACCTGGGGCACTGGCATTGGGGTGTTCGGCGGAGGGACCAAGCTGACCGTCCTAGG	LV4-69	LJ3	QTWGTGIGV	9	4.21687
c31902	201441	NN	ATGGACTGCACCTGGAGGATCCTCCTCTTGGTGGCGGCAGCTACAGGCGCCCACGCCGGGGTCCAGCTGGTGCAGTCTGGGGCTGAGGTGAAGAAGCCTGGGACTTCCGTGAAAATCTCCTGCAAGGTTTCTGGACACACCTTCAGCGCCTACTACATTCAGTGGGTCAAACAAGCCCCTGGAAAAGGGCTTGAGTGGATGGGACTTGTTAATGCTGAAGATGGTGACACCATACATGCAGACAAGTTACGGGGCAGAGTCACCATAACCGCGGACTCTTCTACAGTCACAGCCTACATGGAGGTGGCCCGACTGACATCTGACGACACGGCCGTATATTACTGTGCAACAGACAAGACCGGTGGTGGTGGTTATCTGGATGGTTTTGATGTCTGGGGC…	IGHV1-69-2*01	IGHD2-21*01	IGHJ3*01	ATDKTGGGGYLDGFDV	16	9.94152	ATGAGGCTCCCTGCTCAGCTCCTGGGGCTGCTAATGCTCTGGGTCCCAGGATCCAGTGGGGATGTTGTGCTGACTCAGTCTCCACTCTCCCTGCCCGTCACCCTTGGACAGCCGGCCTCCATCTCCTGCAGGCCTAGTCAAAGCCTCGTCCACAGTGATGGAAACACTTACCTGCATTGGCTTCAGCAGAGGCCAGGCCAATCTCCAAGGCGCCTAATTTATAAAGTTTCTAAGCGGGACTCTGGGGTCCCAGACAGATTCAGCGGCAGTGGGTCAGGCACTGATTTCACGCTGAAAATCAGCAGGGTGGAGGCTGAAGATGTTGGGGTTTATTACTGCATGCAGGGTTCACACTGGCCGTACACTTTTGGCCAGGGGACCAAGCTGGAGATCAAACG	KV2-30	KJ2	MQGSHWPYT	9	3.86905
c31884	201441	NN	ATGGACTGCACCTGGAGGATCCTCCTCTTGGTGGCGGCAGCTACAGGCGCCCACGCCGGGGTCCAGCTGGTGCAGTCTGGGGCTGAGGTGAAGAAGCCTGGGACTTCCGTGAAAATCTCCTGCAAGGTTTCTGGACACACCTTCAGCGCCTACTACATTCAGTGGGTCAAACAAGCCCCTGGAAAAGGGCTTGAGTGGATGGGACTTGTTAATGCTGAAGATGGTGACACCATACATGCAGACAAGTTACGGGGCAGAGTCACCATAACCGCGGACTCTTCTACAGTCACAGCCTACATGGAGGTGGCCCGACTGACATCTGACGACACGGCCGTATATTACTGTGCAACAGACAAGACCGGTGGTGGTGGTTATCTGGATGGTTTTGATGTCTGGGGC…	IGHV1-69-2*01	IGHD2-21*01	IGHJ3*01	ATDKTGGGGYLDGFDV	16	9.94152	ATGAGGCTCCCTGCTCAGCTCCTGGGGCTGCTAATGCTCTGGGTCCCAGGATCCAGTGGGGATGTTGTGCTGACTCAGTCTCCACTCTCCCTGCCCGTCACCCTTGGACAGCCGGCCTCCATCTCCTGCAGGCCTAGTCAAAGCCTCGTCCACAGTGATGGAAACACTTACCTGCATTGGCTTCAGCAGAGGCCAGGCCAATCTCCAAGGCGCCTAATTTATAAAGTTTCTAAGCGGGACTCTGGGGTCCCAGACAGATTCAGCGGCAGTGGGTCAGGCACTGATTTCACGCTGAAAATCAGCAGGGTGGAGGCTGAAGATGTTGGGGTTTATTACTGCATGCAGGGTTCACACTGGCCGTACACTTTTGGCCAGGGGACCAAGCTGGAGATCAAACG	KV2-30	KJ2	MQGSHWPYT	9	3.86905
c31887	201441	NN	ATGGACTGCACCTGGAGGATCCTCCTCTTGGTGGCGGCAGCTACAGGCGCCCACGCCGGGGTCCAGCTGGTGCAGTCTGGGGCTGAGGTGAAGAAGCCTGGGACTTCCGTGAAAATCTCCTGCAAGGTTTCTGGACACACCTTCAGCGCCTACTACATTCAGTGGGTCAAACAAGCCCCTGGAAAAGGGCTTGAGTGGATGGGACTTGTTAATGCTGAAGATGGTGACACCATACATGCAGACAAGTTACGGGGCAGAGTCACCATAACCGCGGACTCTTCTACAGTCACAGCCTACATGGAGGTGGCCCGACTGACATCTGACGACACGGCCGTATATTACTGTGCAACAGACAAGACCGGTGGTGGTGGTTATCTGGATGGTTTTGATGTCTGGGGC…	IGHV1-69-2*01	IGHD2-21*01	IGHJ3*01	ATDKTGGGGYLDGFDV	16	9.94152	ATGAGGCTCCCTGCTCAGCTCCTGGGGCTGCTAATGCTCTGGGTCCCAGGATCCAGTGGGGATGTTGTGCTGACTCAGTCTCCACTCTCCCTGCCCGTCACCCTTGGACAGCCGGCCTCCATCTCCTGCAGGCCTAGTCAAAGCCTCGTCCACAGTGATGGAAACACTTACCTGCATTGGCTTCAGCAGAGGCCAGGCCAATCTCCAAGGCGCCTAATTTATAAAGTTTCTAAGCGGGACTCTGGGGTCCCAGACAGATTCAGCGGCAGTGGGTCAGGCACTGATTTCACGCTGAAAATCAGCAGGGTGGAGGCTGAAGATGTTGGGGTTTATTACTGCATGCAGGGTTCACACTGGCCGTACACTTTTGGCCAGGGGACCAAGCTGGAGATCAAACG	KV2-30	KJ2	MQGSHWPYT	9	3.86905
c31869	201441	NN	ATGGACTGCACCTGGAGGATCCTCCTCTTGGTGGCGGCAGCTACAGGCGCCCACGCCGGGGTCCAGCTGGTGCAGTCTGGGGCTGAGGTGAAGAAGCCTGGGACTTCCGTGAAAATCTCCTGCAAGGTTTCTGGACACACCTTCAGCGCCTACTACATTCAGTGGGTCAAACAAGCCCCTGGAAAAGGGCTTGAGTGGATGGGACTTGTTAATGCTGAAGATGGTGACACCATACATGCAGACAAGTTACGGGGCAGAGTCACCATAACCGCGGACTCTTCTACAGTCACAGCCTACATGGAGGTGGCCCGACTGACATCTGACGACACGGCCGTATATTACTGTGCAACAGACAAGACCGGTGGTGGTGGTTATCTGGATGGTTTTGATGTCTGGGGC…	IGHV1-69-2*01	IGHD2-21*01	IGHJ3*01	ATDKTGGGGYLDGFDV	16	9.94152	ATGAGGCTCCCTGCTCAGCTCCTGGGGCTGCTAATGCTCTGGGTCCCAGGATCCAGTGGGGATGTTGTGCTGACTCAGTCTCCACTCTCCCTGCCCGTCACCCTTGGACAGCCGGCCTCCATCTCCTGCAGGCCTAGTCAAAGCCTCGTCCACAGTGATGGAAACACTTACCTGCATTGGCTTCAGCAGAGGCCAGGCCAATCTCCAAGGCGCCTAATTTATAAAGTTTCTAAGCGGGACTCTGGGGTCCCAGACAGATTCAGCGGCAGTGGGTCAGGCACTGATTTCACGCTGAAAATCAGCAGGGTGGAGGCTGAAGATGTTGGGGTTTATTACTGCATGCAGGGTTCACACTGGCCGTACACTTTTGGCCAGGGGACCAAGCTGGAGATCAAACG	KV2-30	KJ2	MQGSHWPYT	9	3.86905
c31883	201441	NN	ATGGACTGCACCTGGAGGATCCTCCTCTTGGTGGCGGCAGCTACAGGCGCCCACGCCGGGGTCCAGCTGGTGCAGTCTGGGGCTGAGGTGAAGAAGCCTGGGACTTCCGTGAAAATCTCCTGCAAGGTTTCTGGACACACCTTCAGCGCCTACTACATTCAGTGGGTCAAACAAGCCCCTGGAAAAGGGCTTGAGTGGATGGGACTTGTTAATGCTGAAGATGGTGACACCATACATGCAGACAAGTTACGGGGCAGAGTCACCATAACCGCGGACTCTTCTACAGTCACAGCCTACATGGAGGTGGCCCGACTGACATCTGACGACACGGCCGTATATTACTGTGCAACAGACAAGACCGGTGGTGGTGGTTATCTGGATGGTTTTGATGTCTGGGGC…	IGHV1-69-2*01	IGHD2-21*01	IGHJ3*01	ATDKTGGGGYLDGFDV	16	9.94152	ATGAGGCTCCCTGCTCAGCTCCTGGGGCTGCTAATGCTCTGGGTCCCAGGATCCAGTGGGGATGTTGTGCTGACTCAGTCTCCACTCTCCCTGCCCGTCACCCTTGGACAGCCGGCCTCCATCTCCTGCAGGCCTAGTCAAAGCCTCGTCCACAGTGATGGAAACACTTACCTGCATTGGCTTCAGCAGAGGCCAGGCCAATCTCCAAGGCGCCTAATTTATAAAGTTTCTAAGCGGGACTCTGGGGTCCCAGACAGATTCAGCGGCAGTGGGTCAGGCACTGATTTCACGCTGAAAATCAGCAGGGTGGAGGCTGAAGATGTTGGGGTTTATTACTGCATGCAGGGTTCACACTGGCCGTACACTTTTGGCCAGGGGACCAAGCTGGAGATCAAACG	KV2-30	KJ2	MQGSHWPYT	9	3.86905
c31894	201441	NN	ATGGACTGCACCTGGAGGATCCTCCTCTTGGTGGCAGCAGCTACAGGCATCCACGCCGAGGTCCAGCTGGTACAGTCTGGGGCTGAGGTGAAGAAGCCTGGGTCTACAGTGAAAATCTCGTGCAAGGCTTCTGGATACATGTTCAGCGACTACTACATTCACTGGGTCCGACAGGCCCCTGGAAAAGGGCTTGAGTGGGTGGGACTGGTTGAACCTGAAGATGGTGAAACCAACTACGCAGAGAAATTCCGGGGCAGTGTCTCCATCTCCGCGGACACGTCAACGGGCACAGTTTACATGGAACTGAGGAGCCTGAGATCTGAGGACACGGCCGTATATTTTTGTGCAAGAGATGCGGTGGGAGCGGGTTGGTTCGACCCCTGGGGCCAGGGAACCCTG…	IGHV1-69-2*01	IGHD1-26*01	IGHJ5*02	ARDAVGAGWFDP	12	9.46746	ATGGAAACCCCAGCGCAGCTTCTCTTCCTCCTGCTACTCTGGCTCCCAGATATCAGCGAAGAGATGGTGTTGACGCAGTCTCCAGGAACCCTGTCTTTGTCTCTGGGGGAAAGAGCCACCCTCTCCTGCAGGGCCAGTCGGAGTATTAGCAACAGCTACGTAGCCTGGTATCAGCAGAGACCTGGCCTGGCGCCCAGGCTCCTCATCTATGATGTATCTAGGAGGGCCACTGGCATCCCAGACAGGTTCAGTGGCAGTGGGTCTGGGACAGATTTCACCCTCACCATCAGCAGACTGGAGCCTGAAGATTTTGCAGTGTATTACTGTCAGGAGTATGGAAGCTCACTCACGTGGACGTTCGGCCAAGGGACCAAGGTGGAGATCAAACG	KV3D-20	KJ1	QEYGSSLTWT	10	6.50155
c31880	201441	NN	ATGGACTGGACCTGGAGGTTCCTCTTTGTGGTGGCAGCAGCTACAGGTGTCCAATCCCAGGTCCAACTGGTGCAATCTGGGGCTGAAGTGAAGAAGCCTGGGTCCTCAGTGAAGGTCTCCTGCAAGGCCTCTGGAGACACCTTCAGAAGTTATCATGTTACGTGGGTGCGACGGGCCCCTGGACAAGGGCTTGAGTGGATGGGAGGCATCACCCCTATCCTTGCCACTCCAAAATACGGACAGAAATTTCAGGGCAGAATGACGTTAAGCGCGGACGAGTCAACGACCACAGTCTACATGGAGCTGAGCAGTCTGAGACCTGACGACACGGCCGTCTATTACTGTGCGCGCCTCCCCCGGGCCCGGCGTTCTGACAGTGCCTGGGGACAGGGAACCCTG…	IGHV1-69*13	IGHD4-11*01	IGHJ5*02	ARLPRARRSDSA	12	12.2699	ATGGCCTGGACTCCTCTCTTTCTGTTCCTCCTCACTTGCTGCCCAGGGTCCAATTCCCAGGCTGTGGTGACTCAGGAGCCCTCACTGAGTGTGTCCCCAGGAGGGACAGTCACTCTCACCTGTGCCTCCAGCACTGGAGCTGTCACCAGTGGTCACTTTCCCAACTGGTTCCAGCAGAAGCCTGGCCAAGCCCCCAGGACACTGATTTTTGATACAAGTAACAAACAATCCTGGACACCTGCCCGGTTCTCAGGCTCCCTCCTGGGGGGCAAAGCTGCCCTGACCCTTTCGGGTGCGCAGCCTGAGGATGAGGCTGAGTATTTCTGCGCACTCTCCTATAGTGACACCCCTTGGGTGTTCGGCGGTGGGACCAAGCTGGCCGTCCTTGG	LV7-46	LJ3	ALSYSDTPWV	10	4.6875
c31901	201441	NN	ATGGACTGGACCTGGAGGTTCCTCTTTGTGGTGGCAGCAGCTACAGGTGTCCAATCCCAGGTCCAACTGGTGCAATCTGGGGCTGAAGTGAAGAAGCCTGGGTCCTCAGTGAAGGTCTCCTGCAAGGCCTCTGGAGACACCTTCAGAAGTTATCATGTTACGTGGGTGCGACGGGCCCCTGGACAAGGGCTTGAGTGGATGGGAGGCATCACCCCTATCCTTGCCACTCCAAAATACGGACAGAAATTTCAGGGCAGAATGACGTTAAGCGCGGACGAGTCAACGACCACAGTCTACATGGAGCTGAGCAGTCTGAGACCTGACGACACGGCCGTCTATTACTGTGCGCGCCTCCCCCGGGCCCGGCGTTCTGACAGTGCCTGGGGACAGGGAACCCTG…	IGHV1-69*13	IGHD4-11*01	IGHJ5*02	ARLPRARRSDSA	12	12.2699	ATGGCCTGGACTCCTCTCTTTCTGTTCCTCCTCACTTGCTGCCCAGGGTCCAATTCCCAGGCTGTGGTGACTCAGGAGCCCTCACTGAGTGTGTCCCCAGGAGGGACAGTCACTCTCACCTGTGCCTCCAGCACTGGAGCTGTCACCAGTGGTCACTTTCCCAACTGGTTCCAGCAGAAGCCTGGCCAAGCCCCCAGGACACTGATTTTTGATACAAGTAACAAACAATCCTGGACACCTGCCCGGTTCTCAGGCTCCCTCCTGGGGGGCAAAGCTGCCCTGACCCTTTCGGGTGCGCAGCCTGAGGATGAGGCTGAGTATTTCTGCGCACTCTCCTATAGTGACACCCCTTGGGTGTTCGGCGGTGGGACCAAGCTGGCCGTCCTTGG	LV7-46	LJ3	ALSYSDTPWV	10	4.6875
c31896	201441	NN	ATGGACTGGACCTGGAGGTTCCTCTTTGTGGTGGCAGCAGCTACAGGTGTCCAATCCCAGGTCCAACTGGTGCAATCTGGGGCTGAAGTGAAGAAGCCTGGGTCCTCAGTGAAGGTCTCCTGCAAGGCCTCTGGAGACACCTTCAGAAGTTATCATGTTACGTGGGTGCGACGGGCCCCTGGACAAGGGCTTGAGTGGATGGGAGGCATCACCCCTATCCTTGCCACTCCAAAATACGGACAGAAATTTCAGGGCAGAATGACGTTAAGCGCGGACGAGTCAACGACCACAGTCTACATGGAGCTGAGCAGTCTGAGACCTGACGACACGGCCGTCTATTACTGTGCGCGCCTCCCCCGGGCCCGGCGTTCTGACAGTGCCTGGGGACAGGGAACCCTG…	IGHV1-69*13	IGHD4-11*01	IGHJ5*02	ARLPRARRSDSA	12	12.2699	ATGGCCTGGACTCCTCTCTTTCTGTTCCTCCTCACTTGCTGCCCAGGGTCCAATTCCCAGGCTGTGGTGACTCAGGAGCCCTCACTGAGTGTGTCCCCAGGAGGGACAGTCACTCTCACCTGTGCCTCCAGCACTGGAGCTGTCACCAGTGGTCACTTTCCCAACTGGTTCCAGCAGAAGCCTGGCCAAGCCCCCAGGACACTGATTTTTGATACAAGTAACAAACAATCCTGGACACCTGCCCGGTTCTCAGGCTCCCTCCTGGGGGGCAAAGCTGCCCTGACCCTTTCGGGTGCGCAGCCTGAGGATGAGGCTGAGTATTTCTGCGCACTCTCCTATAGTGACACCCCTTGGGTGTTCGGCGGTGGGACCAAGCTGGCCGTCCTTGG	LV7-46	LJ3	ALSYSDTPWV	10	4.6875
c2181	211774	NN	ATGGAGTTTGGGCTGAGCTGGGTTTTCCTCGTTGCTCTTTTAAGAGGTGTCCAGTGTCAGGTACAACTGGTGGAGTCTGGGGGAGGCGTGGTCAAGCCTGGGCGGTCCCTGAGACTCTCCTGTGCAGCCTCTGGATTCACCTTCAGGAGCTTTGTCATGCACTGGGTCCGCCAGGCTCCAGGCAAGGGGCTGGAGTGGGTGGCACTTATATCATATGATGGAAGTGATGAAGACTACGCAGAGTCCGTGAAGGGCCGATTCACCATCTCCAGAGACAATTCCAAGAACACGGTGGATCTGCAAATGAGCAGCCTGACAGCTGAGGACACGGCGATATATTACTGTGCGAAAGGTCTTCCGAGTTGGGGTGGCTGGCCAATGGAGGACTACTACTACTAC…	IGHV3-30*18	IGHD6-19*01	IGHJ6*02	AKGLPSWGGWPMEDYYYYAMDV	22	5.9322	ATGGCCGGCTTCCCTCTCCTCCTCACCCTCCTCACTCACTGTGCAGGGTCCTGGGCCCAGTCTGTGCTGACTCAGCCACCCTCAGCGTCTGGGACCCCCGGACAGAGGGTCACCATCTCTTGTTCTGGAAGCAGCTCCAACATCGGAAGTAATCATGTATACTGGTACAAGCAATTCCCAGGAACGGCCCCCAAACTCCTCATCTATAGGAATAATCAGCGGCCCTCAGGGGTCCCTGACCGATTCTCTGGCTCCAAGTCTGGCACCTCAGCCTCCCTGGCCATCAGTGGGCTCCGGTCCGAGGATGAGGCTGATTATTACTGTGCCGCATGGGATGACAGGTTGAGTGGTTGGGTGTTCGGCGGAGGGAGTAAGCTGACCGTCCTAGG	LV1-47	LJ3	AAWDDRLSGWV	11	3.0303
c2251	211774	NN	ATGGAGTTTGGGCTGAGCTGGGTTTTCCTCGTTGCTCTTTTAAGAGGTGTCCAGTGTCAGGTACAACTGGTGGAGTCTGGGGGAGGCGTGGTCAAGCCTGGGCGGTCCCTGAGACTCTCCTGTGCAGCCTCTGGATTCACCTTCAGGAGCTTTGTCATGCACTGGGTCCGCCAGGCTCCAGGCAAGGGGCTGGAGTGGGTGGCACTTATATCATATGATGGAAGTGATGAAGACTACGCAGAGTCCGTGAAGGGCCGATTCACCATCTCCAGAGACAATTCCAAGAACACGGTGGATCTGCAAATGAGCAGCCTGACAGCTGAGGACACGGCGATATATTACTGTGCGAAAGGTCTTCCGAGTTGGGGTGGCTGGCCAATGGAGGACTACTACTACTAC…	IGHV3-30*18	IGHD6-19*01	IGHJ6*02	AKGLPSWGGWPMEDYYYYAMDV	22	5.9322	ATGGCCGGCTTCCCTCTCCTCCTCACCCTCCTCACTCACTGTGCAGGGTCCTGGGCCCAGTCTGTGCTGACTCAGCCACCCTCAGCGTCTGGGACCCCCGGACAGAGGGTCACCATCTCTTGTTCTGGAAGCAGCTCCAACATCGGAAGTAATCATGTATACTGGTACAAGCAATTCCCAGGAACGGCCCCCAAACTCCTCATCTATAGGAATAATCAGCGGCCCTCAGGGGTCCCTGACCGATTCTCTGGCTCCAAGTCTGGCACCTCAGCCTCCCTGGCCATCAGTGGGCTCCGGTCCGAGGATGAGGCTGATTATTACTGTGCCGCATGGGATGACAGGTTGAGTGGTTGGGTGTTCGGCGGAGGGAGTAAGCTGACCGTCCTAGG	LV1-47	LJ3	AAWDDRLSGWV	11	3.0303
c2187	211774	NN	ATGGAGTTTGGGCTGAGCTGGATTTTCCTTGCTGCTATTTTAAAAGGTGTCCAGTGTGAGGTGCAGCTGGTGGAGTCTGGGGGAGGCTTGGTAAAGCCGGGGGGGTCCCTTAGACTCTCCTGTGCAGCCTCTGGATTCACTTTCAGTAACGCCTGGATGAGCTGGGTCCGCCAGGCTCCAGGGAAGGGGCTGGAGTGGGTTGGCCATATTAAAAGTAAAACTGATGGTGGGACAACAGACTACGCTGCACCCGTGAAAGGCAGATTCACCATCTCAAGAGATGATTCAAAAAAAACGCTGTATCTGCAAATGAGCAGCCTGAAAACCGAGGACACAGCCGTGTATTACTGTACTACCCTCCTTCGGGGAATTATTCCCGACTCCTGGGGCCAGGGAACC…	IGHV3-15*01	IGHD3-10*01	IGHJ5*01	TTLLRGIIPDS	11	2.0649	ATGGCCTGGGCTCTGCTGCTCCTCAACCTCCTCACTCAGGACACAGGGTCCTGGGCCCAGTCTGCCCTGACTCAGCCTGCCTCCGTGTCTGGGTCTCCTGGACAGTCGATCACCATCTCCTGCACTGGAACCAGCAGTGATGTTGGTGGTTATGACTATGTCTCCTGGTACCAACAACACCCAGGCAAATCCCCCAAACTCATGATTTATGATGTCAGTTCGCGGCCCTCAGGAGTTTCTAATCGCTTCTCTGGCTCCAAGTCTGGCAACACGGCCTCCCTGACAATCTCTGGGCTCCAGGCTGAGGACGAGGCTGATTATTTCTGCTGCTCATATGCAGGTAGTGGCACTTTCGTGTTTTCCGACGGAGGGACCAAGCTGACCGTCCTAGG	LV2-23	LJ2	CSYAGSGTFVFS	12	3.72671
c2240	211774	NN	ATGGAGTTTGGGCTGAGCTGGCTTTTTCTTGTGGCTATTTTAAAAGGTGTCCACTGTGAGGTGCAGCTGTTGGAGTCTGGGGGAGGCTTGGTGCAGCCGGGGGGGTCCCTGAGACTCTCCTGTACAGCCTCTGGATTCCCGTTTAGCAACTATGGCATGAGCTGGGTCCGCCAGGCTCCAGGGAAGGGGCTGGAGTGGGTCTCCGGTATGCGTGGAAGTGATGTTGACACATTCTACGCAGACTCCGTGAAGGGCCGGTTCACCATCTCCAGAGACAATTCCAAGAACACACTGTATCTGCAAATGAACACCCTGACAGCCGAGGACACGGCCGTATATTACTGTGCGAAAGGGCAATGGCAGTGGGTACGACATAGTCTTGACTACTGGGGCCAGGGA…	IGHV3-23*01	IGHD6-19*01	IGHJ4*02	AKGQWQWVRHSLDY	14	5.95238	ATGGAAACCCCAGCGCAGCTTCTCTTCCTCCTGCTGCTCTGGCTCCCAGATACCACCGGAGAAATTGTGTTGACGCAGTCTCCAGGCACCCTGTCTTTGTCTCCAGGGGAAAGAGCCACCCTCTCCTGTAGGGCCAGTCAGTTTATTACCAGCAGTTACTTAGCCTGGTACCAGCAGAAACCTGGCCAGACTCCCAGGCTCGTCATCTCTGGTGCATCCAGCAGGGCCGCTGGCATCCCAGACAGGTTCAGTGGCAGTGGGTCTGGGACAGACTTCACTCTCACCATCAGCAGACTGCAGGCTGAAGACTTTGCAGTGTATTACTGTCAGCAATATGATAGTGTACCGCTCACCTTCGGCGGAGGGACCAAGCTGGAGATCAAACG	KV3-20	KJ4	QQYDSVPLT	9	5.34591
c2350	211774	NN	ATGGAGTTTGGGCTGAGCTGGCTTTTTCTTGTGGCTATTTTAAAAGGTGTCCACTGTGAGGTGCAGCTGTTGGAGTCTGGGGGAGGCTTGGTGCAGCCGGGGGGGTCCCTGAGACTCTCCTGTACAGCCTCTGGATTCCCGTTTAGCAACTATGGCATGAGCTGGGTCCGCCAGGCTCCAGGGAAGGGGCTGGAGTGGGTCTCCGGTATGCGTGGAAGTGATGTTGACACATTCTACGCAGACTCCGTGAAGGGCCGGTTCACCATCTCCAGAGACAATTCCAAGAACACACTGTATCTGCAAATGAACACCCTGACAGCCGAGGACACGGCCGTATATTACTGTGCGAAAGGGCAATGGCAGTGGGTACGACATAGTCTTGACTACTGGGGCCAGGGA…	IGHV3-23*01	IGHD6-19*01	IGHJ4*02	AKGQWQWVRHSLDY	14	5.95238	ATGGAAACCCCAGCGCAGCTTCTCTTCCTCCTGCTGCTCTGGCTCCCAGATACCACCGGAGAAATTGTGTTGACGCAGTCTCCAGGCACCCTGTCTTTGTCTCCAGGGGAAAGAGCCACCCTCTCCTGTAGGGCCAGTCAGTTTATTACCAGCAGTTACTTAGCCTGGTACCAGCAGAAACCTGGCCAGACTCCCAGGCTCGTCATCTCTGGTGCATCCAGCAGGGCCGCTGGCATCCCAGACAGGTTCAGTGGCAGTGGGTCTGGGACAGACTTCACTCTCACCATCAGCAGACTGCAGGCTGAAGACTTTGCAGTGTATTACTGTCAGCAATATGATAGTGTACCGCTCACCTTCGGCGGAGGGACCAAGCTGGAGATCAAACG	KV3-20	KJ4	QQYDSVPLT	9	5.34591
c2278	211774	NN	ATGGAGTTTGGGCTGAGCTGGCTTTTTCTTGTGGCTATTTTAAAAGGTGTCCACTGTGAGGTGCAGCTGTTGGAGTCTGGGGGAGGCTTGGTGCAGCCGGGGGGGTCCCTGAGACTCTCCTGTACAGCCTCTGGATTCCCGTTTAGCAACTATGGCATGAGCTGGGTCCGCCAGGCTCCAGGGAAGGGGCTGGAGTGGGTCTCCGGTATGCGTGGAAGTGATGTTGACACATTCTACGCAGACTCCGTGAAGGGCCGGTTCACCATCTCCAGAGACAATTCCAAGAACACACTGTATCTGCAAATGAACACCCTGACAGCCGAGGACACGGCCGTATATTACTGTGCGAAAGGGCAATGGCAGTGGGTACGACATAGTCTTGACTACTGGGGCCAGGGA…	IGHV3-23*01	IGHD6-19*01	IGHJ4*02	AKGQWQWVRHSLDY	14	5.95238	ATGGAAACCCCAGCGCAGCTTCTCTTCCTCCTGCTGCTCTGGCTCCCAGATACCACCGGAGAAATTGTGTTGACGCAGTCTCCAGGCACCCTGTCTTTGTCTCCAGGGGAAAGAGCCACCCTCTCCTGTAGGGCCAGTCAGTTTATTACCAGCAGTTACTTAGCCTGGTACCAGCAGAAACCTGGCCAGACTCCCAGGCTCGTCATCTCTGGTGCATCCAGCAGGGCCGCTGGCATCCCAGACAGGTTCAGTGGCAGTGGGTCTGGGACAGACTTCACTCTCACCATCAGCAGACTGCAGGCTGAAGACTTTGCAGTGTATTACTGTCAGCAATATGATAGTGTACCGCTCACCTTCGGCGGAGGGACCAAGCTGGAGATCAAACG	KV3-20	KJ4	QQYDSVPLT	9	5.34591
c2260	211774	NN	ATGGAGTCATGGCTGCGCTGGGTTTTTCTAGCCGCTATTTTAAAAGGTGTCCAGTGTGAGGCGCAGTTGGTGGAGTCTGGGGGAGGCTTGGTCCAGCCTGGGGGGTCCCTGAGACTCTCCTGTGCAGCCTCTGGATTCACCTTTAGCACCTATGCCGTGAGCTGGGTCCGCCAGGCTCCAGGGAAGGGACTGGAGTGGGTCTCAGCCATTAGTGGTAGTGGTGATAGCACATACTACGCAGACTCTGTGAAGGGCCGGTTCACCATCTCCAGAGACAATTCCAAGAACACGCTATATCTGCAAATGAACAACCTGAGAGCCGAGGACACGGCCGTCTATTACTGTGCGAACCCCGGGAGCAGATACTATCCCGCTCCTTTTGACCACTGGGGCCAGGGA…	IGHV3-23*04	IGHD1-26*01	IGHJ4*02	ANPGSRYYPAPFDH	14	3.8806	ATGGAAACCCCAGCGCAGCTTCTCTTCCTCCTGCTACTCTGGCTCCCAGATACCACCGGAGAAATTGTGTTGACGCAGTCTCCAGGCACCCTGTCTTTGTCTCCAGGGGAAAGAGCCACCCTCTCCTGCAGGGCCAGTCAGAGTGTTAGCAGCAGGTCCTTAGCCTGGTACCACCAGAAACCTGGCCAGGCTCCCAGGCTCCTCATCTATGGTGCATCCAGCAGGGTCACTGGCATCCCAGACAGGTTCAGTGGCAGTGGGTCTGGGACAGACTTCACTCTCACAATCAGCAGACTGGAGCCTGAAGATTTTGCAGTGTATTATTGTCAGCAGTATGGTAGCTCACCGCTCACTTTCGGCGGAGGGACCAAGGTGGAGATCAAACG	KV3-20	KJ4	QQYGSSPLT	9	1.85185
c2264	211774	NN	ATGGAGTCATGGCTGCGCTGGGTTTTTCTAGCCGCTATTTTAAAAGGTGTCCAGTGTGAGGCGCAGTTGGTGGAGTCTGGGGGAGGCTTGGTCCAGCCTGGGGGGTCCCTGAGACTCTCCTGTGCAGCCTCTGGATTCACCTTTAGCACCTATGCCGTGAGCTGGGTCCGCCAGGCTCCAGGGAAGGGACTGGAGTGGGTCTCAGCCATTAGTGGTAGTGGTGATAGCACATACTACGCAGACTCTGTGAAGGGCCGGTTCACCATCTCCAGAGACAATTCCAAGAACACGCTATATCTGCAAATGAACAACCTGAGAGCCGAGGACACGGCCGTCTATTACTGTGCGAACCCCGGGAGCAGATACTATCCCGCTCCTTTTGACCACTGGGGCCAGGGA…	IGHV3-23*04	IGHD1-26*01	IGHJ4*02	ANPGSRYYPAPFDH	14	3.8806	ATGGAAACCCCAGCGCAGCTTCTCTTCCTCCTGCTACTCTGGCTCCCAGATACCACCGGAGAAATTGTGTTGACGCAGTCTCCAGGCACCCTGTCTTTGTCTCCAGGGGAAAGAGCCACCCTCTCCTGCAGGGCCAGTCAGAGTGTTAGCAGCAGGTCCTTAGCCTGGTACCACCAGAAACCTGGCCAGGCTCCCAGGCTCCTCATCTATGGTGCATCCAGCAGGGTCACTGGCATCCCAGACAGGTTCAGTGGCAGTGGGTCTGGGACAGACTTCACTCTCACAATCAGCAGACTGGAGCCTGAAGATTTTGCAGTGTATTATTGTCAGCAGTATGGTAGCTCACCGCTCACTTTCGGCGGAGGGACCAAGGTGGAGATCAAACG	KV3-20	KJ4	QQYGSSPLT	9	1.85185
c2103	211774	NN	ATGGAGTCATGGCTGCGCTGGGTTTTTCTAGCCGCTATTTTAAAAGGTGTCCAGTGTGAGGCGCAGTTGGTGGAGTCTGGGGGAGGCTTGGTCCAGCCTGGGGGGTCCCTGAGACTCTCCTGTGCAGCCTCTGGATTCACCTTTAGCACCTATGCCGTGAGCTGGGTCCGCCAGGCTCCAGGGAAGGGACTGGAGTGGGTCTCAGCCATTAGTGGTAGTGGTGATAGCACATACTACGCAGACTCTGTGAAGGGCCGGTTCACCATCTCCAGAGACAATTCCAAGAACACGCTATATCTGCAAATGAACAACCTGAGAGCCGAGGACACGGCCGTCTATTACTGTGCGAACCCCGGGAGCAGATACTATCCCGCTCCTTTTGACCACTGGGGCCAGGGA…	IGHV3-23*04	IGHD1-26*01	IGHJ4*02	ANPGSRYYPAPFDH	14	3.8806	ATGGAAACCCCAGCGCAGCTTCTCTTCCTCCTGCTACTCTGGCTCCCAGATACCACCGGAGAAATTGTGTTGACGCAGTCTCCAGGCACCCTGTCTTTGTCTCCAGGGGAAAGAGCCACCCTCTCCTGCAGGGCCAGTCAGAGTGTTAGCAGCAGGTCCTTAGCCTGGTACCACCAGAAACCTGGCCAGGCTCCCAGGCTCCTCATCTATGGTGCATCCAGCAGGGTCACTGGCATCCCAGACAGGTTCAGTGGCAGTGGGTCTGGGACAGACTTCACTCTCACAATCAGCAGACTGGAGCCTGAAGATTTTGCAGTGTATTATTGTCAGCAGTATGGTAGCTCACCGCTCACTTTCGGCGGAGGGACCAAGGTGGAGATCAAACG	KV3-20	KJ4	QQYGSSPLT	9	1.85185
c2001	211774	NN	ATGGAGTCATGGCTGCGCTGGGTTTTTCTAGCCGCTATTTTAAAAGGTGTCCAGTGTGAGGCGCAGTTGGTGGAGTCTGGGGGAGGCTTGGTCCAGCCTGGGGGGTCCCTGAGACTCTCCTGTGCAGCCTCTGGATTCACCTTTAGCACCTATGCCGTGAGCTGGGTCCGCCAGGCTCCAGGGAAGGGACTGGAGTGGGTCTCAGCCATTAGTGGTAGTGGTGATAGCACATACTACGCAGACTCTGTGAAGGGCCGGTTCACCATCTCCAGAGACAATTCCAAGAACACGCTATATCTGCAAATGAACAACCTGAGAGCCGAGGACACGGCCGTCTATTACTGTGCGAACCCCGGGAGCAGATACTATCCCGCTCCTTTTGACCACTGGGGCCAGGGA…	IGHV3-23*04	IGHD1-26*01	IGHJ4*02	ANPGSRYYPAPFDH	14	3.8806	ATGGAAACCCCAGCGCAGCTTCTCTTCCTCCTGCTACTCTGGCTCCCAGATACCACCGGAGAAATTGTGTTGACGCAGTCTCCAGGCACCCTGTCTTTGTCTCCAGGGGAAAGAGCCACCCTCTCCTGCAGGGCCAGTCAGAGTGTTAGCAGCAGGTCCTTAGCCTGGTACCACCAGAAACCTGGCCAGGCTCCCAGGCTCCTCATCTATGGTGCATCCAGCAGGGTCACTGGCATCCCAGACAGGTTCAGTGGCAGTGGGTCTGGGACAGACTTCACTCTCACAATCAGCAGACTGGAGCCTGAAGATTTTGCAGTGTATTATTGTCAGCAGTATGGTAGCTCACCGCTCACTTTCGGCGGAGGGACCAAGGTGGAGATCAAACG	KV3-20	KJ4	QQYGSSPLT	9	1.85185
c2012	211774	NN	ATGGAGTCATGGCTGCGCTGGGTTTTTCTAGCCGCTATTTTAAAAGGTGTCCAGTGTGAGGCGCAGTTGGTGGAGTCTGGGGGAGGCTTGGTCCAGCCTGGGGGGTCCCTGAGACTCTCCTGTGCAGCCTCTGGATTCACCTTTAGCACCTATGCCGTGAGCTGGGTCCGCCAGGCTCCAGGGAAGGGACTGGAGTGGGTCTCAGCCATTAGTGGTAGTGGTGATAGCACATACTACGCAGACTCTGTGAAGGGCCGGTTCACCATCTCCAGAGACAATTCCAAGAACACGCTATATCTGCAAATGAACAACCTGAGAGCCGAGGACACGGCCGTCTATTACTGTGCGAACCCCGGGAGCAGATACTATCCCGCTCCTTTTGACCACTGGGGCCAGGGA…	IGHV3-23*04	IGHD1-26*01	IGHJ4*02	ANPGSRYYPAPFDH	14	3.8806	ATTTAGATTACATGGGTGACTTTTCTGTTTTATTTCCAATCTCAGATACCACCGGAGAAATTGTGTTGACGCAGTCTCCAGGCACCCTGTCTTTGTCTCCAGGGGAAAGAGCCACCCTCTCCTGCAGGGCCAGTCAGAGTGTTAGCAGCAGGTCCTTAGCCTGGTACCACCAGAAACCTGGCCAGGCTCCCAGGCTCCTCATCTATGGTGCATCCAGCAGGGTCACTGGCATCCCAGACAGGTTCAGTGGCAGTGGGTCTGGGACAGACTTCACTCTCACAATCAGCAGACTGGAGCCTGAAGATTTTGCAGTGTATTATTGTCAGCAGTATGGTAGCTCACCGCTCACTTTCGGCGGAGGGACCAAGGTGGAGATCAAACG	KV3-20	KJ4	QQYGSSPLT	9	1.85185
c1808	211774	NN	ATGGAGTCATGGCTGCGCTGGGTTTTTCTAGCCGCTATTTTAAAAGGTGTCCAGTGTGAGGCGCAGTTGGTGGAGTCTGGGGGAGGCTTGGTCCAGCCTGGGGGGTCCCTGAGACTCTCCTGTGCAGCCTCTGGATTCACCTTTAGCACCTATGCCGTGAGCTGGGTCCGCCAGGCTCCAGGGAAGGGACTGGAGTGGGTCTCAGCCATTAGTGGTAGTGGTGATAGCACATACTACGCAGACTCTGTGAAGGGCCGGTTCACCATCTCCAGAGACAATTCCAAGAACACGCTATATCTGCAAATGAACAACCTGAGAGCCGAGGACACGGCCGTCTATTACTGTGCGAACCCCGGGAGCAGATACTATCCCGCTCCTTTTGACCACTGGGGCCAGGGA…	IGHV3-23*04	IGHD1-26*01	IGHJ4*02	ANPGSRYYPAPFDH	14	3.8806	ATGGAAACCCCAGCGCAGCTTCTCTTCCTCCTGCTACTCTGGCTCCCAGATACCACCGGAGAAATTGTGTTGACGCAGTCTCCAGGCACCCTGTCTTTGTCTCCAGGGGAAAGAGCCACCCTCTCCTGCAGGGCCAGTCAGAGTGTTAGCAGCAGGTCCTTAGCCTGGTACCACCAGAAACCTGGCCAGGCTCCCAGGCTCCTCATCTATGGTGCATCCAGCAGGGTCACTGGCATCCCAGACAGGTTCAGTGGCAGTGGGTCTGGGACAGACTTCACTCTCACAATCAGCAGACTGGAGCCTGAAGATTTTGCAGTGTATTATTGTCAGCAGTATGGTAGCTCACCGCTCACTTTCGGCGGAGGGACCAAGGTGGAGATCAAACG	KV3-20	KJ4	QQYGSSPLT	9	1.85185
c2312	211774	NN	ATGGAGTCATGGCTGCGCTGGGTTTTTCTAGCCGCTATTTTAAAAGGTGTCCAGTGTGAGGCGCAGTTGGTGGAGTCTGGGGGAGGCTTGGTCCAGCCTGGGGGGTCCCTGAGACTCTCCTGTGCAGCCTCTGGATTCACCTTTAGCACCTATGCCGTGAGCTGGGTCCGCCAGGCTCCAGGGAAGGGACTGGAGTGGGTCTCAGCCATTAGTGGTAGTGGTGATAGCACATACTACGCAGACTCTGTGAAGGGCCGGTTCACCATCTCCAGAGACAATTCCAAGAACACGCTATATCTGCAAATGAACAACCTGAGAGCCGAGGACACGGCCGTCTATTACTGTGCGAACCCCGGGAGCAGATACTATCCCGCTCCTTTTGACCACTGGGGCCAGGGA…	IGHV3-23*04	IGHD1-26*01	IGHJ4*02	ANPGSRYYPAPFDH	14	3.8806	ATGGAAACCCCAGCGCAGCTTCTCTTCCTCCTGCTACTCTGGCTCCCAGATACCACCGGAGAAATTGTGTTGACGCAGTCTCCAGGCACCCTGTCTTTGTCTCCAGGGGAAAGAGCCACCCTCTCCTGCAGGGCCAGTCAGAGTGTTAGCAGCAGGTCCTTAGCCTGGTACCACCAGAAACCTGGCCAGGCTCCCAGGCTCCTCATCTATGGTGCATCCAGCAGGGTCACTGGCATCCCAGACAGGTTCAGTGGCAGTGGGTCTGGGACAGACTTCACTCTCACAATCAGCAGACTGGAGCCTGAAGATTTTGCAGTGTATTATTGTCAGCAGTATGGTAGCTCACCGCTCACTTTCGGCGGAGGGACCAAGGTGGAGATCAAACG	KV3-20	KJ4	QQYGSSPLT	9	1.85185
c1935	211774	NN	ATGGAGTCATGGCTGCGCTGGGTTTTTCTAGCCGCTATTTTAAAAGGTGTCCAGTGTGAGGCGCAGTTGGTGGAGTCTGGGGGAGGCTTGGTCCAGCCTGGGGGGTCCCTGAGACTCTCCTGTGCAGCCTCTGGATTCACCTTTAGCACCTATGCCGTGAGCTGGGTCCGCCAGGCTCCAGGGAAGGGACTGGAGTGGGTCTCAGCCATTAGTGGTAGTGGTGATAGCACATACTACGCAGACTCTGTGAAGGGCCGGTTCACCATCTCCAGAGACAATTCCAAGAACACGCTATATCTGCAAATGAACAACCTGAGAGCCGAGGACACGGCCGTCTATTACTGTGCGAACCCCGGGAGCAGATACTATCCCGCTCCTTTTGACCACTGGGGCCAGGGA…	IGHV3-23*04	IGHD1-26*01	IGHJ4*02	ANPGSRYYPAPFDH	14	3.8806	ATGGAAACCCCAGCGCAGCTTCTCTTCCTCCTGCTACTCTGGCTCCCAGATACCACCGGAGAAATTGTGTTGACGCAGTCTCCAGGCACCCTGTCTTTGTCTCCAGGGGAAAGAGCCACCCTCTCCTGCAGGGCCAGTCAGAGTGTTAGCAGCAGGTCCTTAGCCTGGTACCACCAGAAACCTGGCCAGGCTCCCAGGCTCCTCATCTATGGTGCATCCAGCAGGGTCACTGGCATCCCAGACAGGTTCAGTGGCAGTGGGTCTGGGACAGACTTCACTCTCACAATCAGCAGACTGGAGCCTGAAGATTTTGCAGTGTATTATTGTCAGCAGTATGGTAGCTCACCGCTCACTTTCGGCGGAGGGACCAAGGTGGAGATCAAACG	KV3-20	KJ4	QQYGSSPLT	9	1.85185
c2332	211774	NN	ATGGAGTCATGGCTGCGCTGGGTTTTTCTAGCCGCTATTTTAAAAGGTGTCCAGTGTGAGGCGCAGTTGGTGGAGTCTGGGGGAGGCTTGGTCCAGCCTGGGGGGTCCCTGAGACTCTCCTGTGCAGCCTCTGGATTCACCTTTAGCACCTATGCCGTGAGCTGGGTCCGCCAGGCTCCAGGGAAGGGACTGGAGTGGGTCTCAGCCATTAGTGGTAGTGGTGATAGCACATACTACGCAGACTCTGTGAAGGGCCGGTTCACCATCTCCAGAGACAATTCCAAGAACACGCTATATCTGCAAATGAACAACCTGAGAGCCGAGGACACGGCCGTCTATTACTGTGCGAACCCCGGGAGCAGATACTATCCCGCTCCTTTTGACCACTGGGGCCAGGGA…	IGHV3-23*04	IGHD1-26*01	IGHJ4*02	ANPGSRYYPAPFDH	14	3.8806	ATGGAAACCCCAGCGCAGCTTCTCTTCCTCCTGCTACTCTGGCTCCCAGATACCACCGGAGAAATTGTGTTGACGCAGTCTCCAGGCACCCTGTCTTTGTCTCCAGGGGAAAGAGCCACCCTCTCCTGCAGGGCCAGTCAGAGTGTTAGCAGCAGGTCCTTAGCCTGGTACCACCAGAAACCTGGCCAGGCTCCCAGGCTCCTCATCTATGGTGCATCCAGCAGGGTCACTGGCATCCCAGACAGGTTCAGTGGCAGTGGGTCTGGGACAGACTTCACTCTCACAATCAGCAGACTGGAGCCTGAAGATTTTGCAGTGTATTATTGTCAGCAGTATGGTAGCTCACCGCTCACTTTCGGCGGAGGGACCAAGGTGGAGATCAAACG	KV3-20	KJ4	QQYGSSPLT	9	1.85185
c2215	211774	NN	ATGGAGTCATGGCTGCGCTGGGTTTTTCTAGCCGCTATTTTAAAAGGTGTCCAGTGTGAGGCGCAGTTGGTGGAGTCTGGGGGAGGCTTGGTCCAGCCTGGGGGGTCCCTGAGACTCTCCTGTGCAGCCTCTGGATTCACCTTTAGCACCTATGCCGTGAGCTGGGTCCGCCAGGCTCCAGGGAAGGGACTGGAGTGGGTCTCAGCCATTAGTGGTAGTGGTGATAGCACATACTACGCAGACTCTGTGAAGGGCCGGTTCACCATCTCCAGAGACAATTCCAAGAACACGCTATATCTGCAAATGAACAACCTGAGAGCCGAGGACACGGCCGTCTATTACTGTGCGAACCCCGGGAGCAGATACTATCCCGCTCCTTTTGACCACTGGGGCCAGGGA…	IGHV3-23*04	IGHD1-26*01	IGHJ4*02	ANPGSRYYPAPFDH	14	3.8806	ATGGAAACCCCAGCGCAGCTTCTCTTCCTCCTGCTACTCTGGCTCCCAGATACCACCGGAGAAATTGTGTTGACGCAGTCTCCAGGCACCCTGTCTTTGTCTCCAGGGGAAAGAGCCACCCTCTCCTGCAGGGCCAGTCAGAGTGTTAGCAGCAGGTCCTTAGCCTGGTACCACCAGAAACCTGGCCAGGCTCCCAGGCTCCTCATCTATGGTGCATCCAGCAGGGTCACTGGCATCCCAGACAGGTTCAGTGGCAGTGGGTCTGGGACAGACTTCACTCTCACAATCAGCAGACTGGAGCCTGAAGATTTTGCAGTGTATTATTGTCAGCAGTATGGTAGCTCACCGCTCACTTTCGGCGGAGGGACCAAGGTGGAGATCAAACG	KV3-20	KJ4	QQYGSSPLT	9	1.85185
c1844	211774	NN	ATGGAGTCATGGCTGCGCTGGGTTTTTCTAGCCGCTATTTTAAAAGGTGTCCAGTGTGAGGCGCAGTTGGTGGAGTCTGGGGGAGGCTTGGTCCAGCCTGGGGGGTCCCTGAGACTCTCCTGTGCAGCCTCTGGATTCACCTTTAGCACCTATGCCGTGAGCTGGGTCCGCCAGGCTCCAGGGAAGGGACTGGAGTGGGTCTCAGCCATTAGTGGTAGTGGTGATAGCACATACTACGCAGACTCTGTGAAGGGCCGGTTCACCATCTCCAGAGACAATTCCAAGAACACGCTATATCTGCAAATGAACAACCTGAGAGCCGAGGACACGGCCGTCTATTACTGTGCGAACCCCGGGAGCAGATACTATCCCGCTCCTTTTGACCACTGGGGCCAGGGA…	IGHV3-23*04	IGHD1-26*01	IGHJ4*02	ANPGSRYYPAPFDH	14	3.8806	ATGGAAACCCCAGCGCAGCTTCTCTTCCTCCTGCTACTCTGGCTCCCAGATACCACCGGAGAAATTGTGTTGACGCAGTCTCCAGGCACCCTGTCTTTGTCTCCAGGGGAAAGAGCCACCCTCTCCTGCAGGGCCAGTCAGAGTGTTAGCAGCAGGTCCTTAGCCTGGTACCACCAGAAACCTGGCCAGGCTCCCAGGCTCCTCATCTATGGTGCATCCAGCAGGGTCACTGGCATCCCAGACAGGTTCAGTGGCAGTGGGTCTGGGACAGACTTCACTCTCACAATCAGCAGACTGGAGCCTGAAGATTTTGCAGTGTATTATTGTCAGCAGTATGGTAGCTCACCGCTCACTTTCGGCGGAGGGACCAAGGTGGAGATCAAACG	KV3-20	KJ4	QQYGSSPLT	9	1.85185
c2074	211774	NN	ATGGAGTCATGGCTGCGCTGGGTTTTTCTAGCCGCTATTTTAAAAGGTGTCCAGTGTGAGGCGCAGTTGGTGGAGTCTGGGGGAGGCTTGGTCCAGCCTGGGGGGTCCCTGAGACTCTCCTGTGCAGCCTCTGGATTCACCTTTAGCACCTATGCCGTGAGCTGGGTCCGCCAGGCTCCAGGGAAGGGACTGGAGTGGGTCTCAGCCATTAGTGGTAGTGGTGATAGCACATACTACGCAGACTCTGTGAAGGGCCGGTTCACCATCTCCAGAGACAATTCCAAGAACACGCTATATCTGCAAATGAACAACCTGAGAGCCGAGGACACGGCCGTCTATTACTGTGCGAACCCCGGGAGCAGATACTATCCCGCTCCTTTTGACCACTGGGGCCAGGGA…	IGHV3-23*04	IGHD1-26*01	IGHJ4*02	ANPGSRYYPAPFDH	14	3.8806	ATGGAAACCCCAGCGCAGCTTCTCTTCCTCCTGCTACTCTGGCTCCCAGATACCACCGGAGAAATTGTGTTGACGCAGTCTCCAGGCACCCTGTCTTTGTCTCCAGGGGAAAGAGCCACCCTCTCCTGCAGGGCCAGTCAGAGTGTTAGCAGCAGGTCCTTAGCCTGGTACCACCAGAAACCTGGCCAGGCTCCCAGGCTCCTCATCTATGGTGCATCCAGCAGGGTCACTGGCATCCCAGACAGGTTCAGTGGCAGTGGGTCTGGGACAGACTTCACTCTCACAATCAGCAGACTGGAGCCTGAAGATTTTGCAGTGTATTATTGTCAGCAGTATGGTAGCTCACCGCTCACTTTCGGCGGAGGGACCAAGGTGGAGATCAAACG	KV3-20	KJ4	QQYGSSPLT	9	1.85185
c2143	211774	NN	ATGGAGTCATGGCTGCGCTGGGTTTTTCTAGCCGCTATTTTAAAAGGTGTCCAGTGTGAGGCGCAGTTGGTGGAGTCTGGGGGAGGCTTGGTCCAGCCTGGGGGGTCCCTGAGACTCTCCTGTGCAGCCTCTGGATTCACCTTTAGCACCTATGCCGTGAGCTGGGTCCGCCAGGCTCCAGGGAAGGGACTGGAGTGGGTCTCAGCCATTAGTGGTAGTGGTGATAGCACATACTACGCAGACTCTGTGAAGGGCCGGTTCACCATCTCCAGAGACAATTCCAAGAACACGCTATATCTGCAAATGAACAACCTGAGAGCCGAGGACACGGCCGTCTATTACTGTGCGAACCCCGGGAGCAGATACTATCCCGCTCCTTTTGACCACTGGGGCCAGGGA…	IGHV3-23*04	IGHD1-26*01	IGHJ4*02	ANPGSRYYPAPFDH	14	3.8806	ATGGAAACCCCAGCGCAGCTTCTCTTCCTCCTGCTACTCTGGCTCCCAGATACCACCGGAGAAATTGTGTTGACGCAGTCTCCAGGCACCCTGTCTTTGTCTCCAGGGGAAAGAGCCACCCTCTCCTGCAGGGCCAGTCAGAGTGTTAGCAGCAGGTCCTTAGCCTGGTACCACCAGAAACCTGGCCAGGCTCCCAGGCTCCTCATCTATGGTGCATCCAGCAGGGTCACTGGCATCCCAGACAGGTTCAGTGGCAGTGGGTCTGGGACAGACTTCACTCTCACAATCAGCAGACTGGAGCCTGAAGATTTTGCAGTGTATTATTGTCAGCAGTATGGTAGCTCACCGCTCACTTTCGGCGGAGGGACCAAGGTGGAGATCAAACG	KV3-20	KJ4	QQYGSSPLT	9	1.85185
c1986	211774	NN	ATGGAGTCATGGCTGCGCTGGGTTTTTCTAGCCGCTATTTTAAAAGGTGTCCAGTGTGAGGCGCAGTTGGTGGAGTCTGGGGGAGGCTTGGTCCAGCCTGGGGGGTCCCTGAGACTCTCCTGTGCAGCCTCTGGATTCACCTTTAGCACCTATGCCGTGAGCTGGGTCCGCCAGGCTCCAGGGAAGGGACTGGAGTGGGTCTCAGCCATTAGTGGTAGTGGTGATAGCACATACTACGCAGACTCTGTGAAGGGCCGGTTCACCATCTCCAGAGACAATTCCAAGAACACGCTATATCTGCAAATGAACAACCTGAGAGCCGAGGACACGGCCGTCTATTACTGTGCGAACCCCGGGAGCAGATACTATCCCGCTCCTTTTGACCACTGGGGCCAGGGA…	IGHV3-23*04	IGHD1-26*01	IGHJ4*02	ANPGSRYYPAPFDH	14	3.8806	ATGGAAACCCCAGCGCAGCTTCTCTTCCTCCTGCTACTCTGGCTCCCAGATACCACCGGAGAAATTGTGTTGACGCAGTCTCCAGGCACCCTGTCTTTGTCTCCAGGGGAAAGAGCCACCCTCTCCTGCAGGGCCAGTCAGAGTGTTAGCAGCAGGTCCTTAGCCTGGTACCACCAGAAACCTGGCCAGGCTCCCAGGCTCCTCATCTATGGTGCATCCAGCAGGGTCACTGGCATCCCAGACAGGTTCAGTGGCAGTGGGTCTGGGACAGACTTCACTCTCACAATCAGCAGACTGGAGCCTGAAGATTTTGCAGTGTATTATTGTCAGCAGTATGGTAGCTCACCGCTCACTTTCGGCGGAGGGACCAAGGTGGAGATCAAACG	KV3-20	KJ4	QQYGSSPLT	9	1.85185
c2153	211774	NN	ATGGAGTCATGGCTGCGCTGGGTTTTTCTAGCCGCTATTTTAAAAGGTGTCCAGTGTGAGGCGCAGTTGGTGGAGTCTGGGGGAGGCTTGGTCCAGCCTGGGGGGTCCCTGAGACTCTCCTGTGCAGCCTCTGGATTCACCTTTAGCACCTATGCCGTGAGCTGGGTCCGCCAGGCTCCAGGGAAGGGACTGGAGTGGGTCTCAGCCATTAGTGGTAGTGGTGATAGCACATACTACGCAGACTCTGTGAAGGGCCGGTTCACCATCTCCAGAGACAATTCCAAGAACACGCTATATCTGCAAATGAACAACCTGAGAGCCGAGGACACGGCCGTCTATTACTGTGCGAACCCCGGGAGCAGATACTATCCCGCTCCTTTTGACCACTGGGGCCAGGGA…	IGHV3-23*04	IGHD1-26*01	IGHJ4*02	ANPGSRYYPAPFDH	14	3.8806	ATGGAAACCCCAGCGCAGCTTCTCTTCCTCCTGCTACTCTGGCTCCCAGATACCACCGGAGAAATTGTGTTGACGCAGTCTCCAGGCACCCTGTCTTTGTCTCCAGGGGAAAGAGCCACCCTCTCCTGCAGGGCCAGTCAGAGTGTTAGCAGCAGGTCCTTAGCCTGGTACCACCAGAAACCTGGCCAGGCTCCCAGGCTCCTCATCTATGGTGCATCCAGCAGGGTCACTGGCATCCCAGACAGGTTCAGTGGCAGTGGGTCTGGGACAGACTTCACTCTCACAATCAGCAGACTGGAGCCTGAAGATTTTGCAGTGTATTATTGTCAGCAGTATGGTAGCTCACCGCTCACTTTCGGCGGAGGGACCAAGGTGGAGATCAAACG	KV3-20	KJ4	QQYGSSPLT	9	1.85185
c2206	211774	NN	ATGGAGTCATGGCTGCGCTGGGTTTTTCTAGCCGCTATTTTAAAAGGTGTCCAGTGTGAGGCGCAGTTGGTGGAGTCTGGGGGAGGCTTGGTCCAGCCTGGGGGGTCCCTGAGACTCTCCTGTGCAGCCTCTGGATTCACCTTTAGCACCTATGCCGTGAGCTGGGTCCGCCAGGCTCCAGGGAAGGGACTGGAGTGGGTCTCAGCCATTAGTGGTAGTGGTGATAGCACATACTACGCAGACTCTGTGAAGGGCCGGTTCACCATCTCCAGAGACAATTCCAAGAACACGCTATATCTGCAAATGAACAACCTGAGAGCCGAGGACACGGCCGTCTATTACTGTGCGAACCCCGGGAGCAGATACTATCCCGCTCCTTTTGACCACTGGGGCCAGGGA…	IGHV3-23*04	IGHD1-26*01	IGHJ4*02	ANPGSRYYPAPFDH	14	3.8806	ATGGAAACCCCAGCGCAGCTTCTCTTCCTCCTGCTACTCTGGCTCCCAGATACCACCGGAGAAATTGTGTTGACGCAGTCTCCAGGCACCCTGTCTTTGTCTCCAGGGGAAAGAGCCACCCTCTCCTGCAGGGCCAGTCAGAGTGTTAGCAGCAGGTCCTTAGCCTGGTACCACCAGAAACCTGGCCAGGCTCCCAGGCTCCTCATCTATGGTGCATCCAGCAGGGTCACTGGCATCCCAGACAGGTTCAGTGGCAGTGGGTCTGGGACAGACTTCACTCTCACAATCAGCAGACTGGAGCCTGAAGATTTTGCAGTGTATTATTGTCAGCAGTATGGTAGCTCACCGCTCACTTTCGGCGGAGGGACCAAGGTGGAGATCAAACG	KV3-20	KJ4	QQYGSSPLT	9	1.85185
c2098	211774	NN	ATGGAGTCATGGCTGCGCTGGGTTTTTCTAGCCGCTATTTTAAAAGGTGTCCAGTGTGAGGCGCAGTTGGTGGAGTCTGGGGGAGGCTTGGTCCAGCCTGGGGGGTCCCTGAGACTCTCCTGTGCAGCCTCTGGATTCACCTTTAGCACCTATGCCGTGAGCTGGGTCCGCCAGGCTCCAGGGAAGGGACTGGAGTGGGTCTCAGCCATTAGTGGTAGTGGTGATAGCACATACTACGCAGACTCTGTGAAGGGCCGGTTCACCATCTCCAGAGACAATTCCAAGAACACGCTATATCTGCAAATGAACAACCTGAGAGCCGAGGACACGGCCGTCTATTACTGTGCGAACCCCGGGAGCAGATACTATCCCGCTCCTTTTGACCACTGGGGCCAGGGA…	IGHV3-23*04	IGHD1-26*01	IGHJ4*02	ANPGSRYYPAPFDH	14	3.8806	ATGGAAACCCCAGCGCAGCTTCTCTTCCTCCTGCTACTCTGGCTCCCAGATACCACCGGAGAAATTGTGTTGACGCAGTCTCCAGGCACCCTGTCTTTGTCTCCAGGGGAAAGAGCCACCCTCTCCTGCAGGGCCAGTCAGAGTGTTAGCAGCAGGTCCTTAGCCTGGTACCACCAGAAACCTGGCCAGGCTCCCAGGCTCCTCATCTATGGTGCATCCAGCAGGGTCACTGGCATCCCAGACAGGTTCAGTGGCAGTGGGTCTGGGACAGACTTCACTCTCACAATCAGCAGACTGGAGCCTGAAGATTTTGCAGTGTATTATTGTCAGCAGTATGGTAGCTCACCGCTCACTTTCGGCGGAGGGACCAAGGTGGAGATCAAACG	KV3-20	KJ4	QQYGSSPLT	9	1.85185
c2236	211774	NN	ATGGAGTCATGGCTGCGCTGGGTTTTTCTAGCCGCTATTTTAAAAGGTGTCCAGTGTGAGGCGCAGTTGGTGGAGTCTGGGGGAGGCTTGGTCCAGCCTGGGGGGTCCCTGAGACTCTCCTGTGCAGCCTCTGGATTCACCTTTAGCACCTATGCCGTGAGCTGGGTCCGCCAGGCTCCAGGGAAGGGACTGGAGTGGGTCTCAGCCATTAGTGGTAGTGGTGATAGCACATACTACGCAGACTCTGTGAAGGGCCGGTTCACCATCTCCAGAGACAATTCCAAGAACACGCTATATCTGCAAATGAACAACCTGAGAGCCGAGGACACGGCCGTCTATTACTGTGCGAACCCCGGGAGCAGATACTATCCCGCTCCTTTTGACCACTGGGGCCAGGGA…	IGHV3-23*04	IGHD1-26*01	IGHJ4*02	ANPGSRYYPAPFDH	14	3.8806	ATGGAAACCCCAGCGCAGCTTCTCTTCCTCCTGCTACTCTGGCTCCCAGATACCACCGGAGAAATTGTGTTGACGCAGTCTCCAGGCACCCTGTCTTTGTCTCCAGGGGAAAGAGCCACCCTCTCCTGCAGGGCCAGTCAGAGTGTTAGCAGCAGGTCCTTAGCCTGGTACCACCAGAAACCTGGCCAGGCTCCCAGGCTCCTCATCTATGGTGCATCCAGCAGGGTCACTGGCATCCCAGACAGGTTCAGTGGCAGTGGGTCTGGGACAGACTTCACTCTCACAATCAGCAGACTGGAGCCTGAAGATTTTGCAGTGTATTATTGTCAGCAGTATGGTAGCTCACCGCTCACTTTCGGCGGAGGGACCAAGGTGGAGATCAAACG	KV3-20	KJ4	QQYGSSPLT	9	1.85185
c1847	211774	NN	ATGGAGTCATGGCTGCGCTGGGTTTTTCTAGCCGCTATTTTAAAAGGTGTCCAGTGTGAGGCGCAGTTGGTGGAGTCTGGGGGAGGCTTGGTCCAGCCTGGGGGGTCCCTGAGACTCTCCTGTGCAGCCTCTGGATTCACCTTTAGCACCTATGCCGTGAGCTGGGTCCGCCAGGCTCCAGGGAAGGGACTGGAGTGGGTCTCAGCCATTAGTGGTAGTGGTGATAGCACATACTACGCAGACTCTGTGAAGGGCCGGTTCACCATCTCCAGAGACAATTCCAAGAACACGCTATATCTGCAAATGAACAACCTGAGAGCCGAGGACACGGCCGTCTATTACTGTGCGAACCCCGGGAGCAGATACTATCCCGCTCCTTTTGACCACTGGGGCCAGGGA…	IGHV3-23*04	IGHD1-26*01	IGHJ4*02	ANPGSRYYPAPFDH	14	3.8806	ATGGAAACCCCAGCGCAGCTTCTCTTCCTCCTGCTACTCTGGCTCCCAGATACCACCGGAGAAATTGTGTTGACGCAGTCTCCAGGCACCCTGTCTTTGTCTCCAGGGGAAAGAGCCACCCTCTCCTGCAGGGCCAGTCAGAGTGTTAGCAGCAGGTCCTTAGCCTGGTACCACCAGAAACCTGGCCAGGCTCCCAGGCTCCTCATCTATGGTGCATCCAGCAGGGTCACTGGCATCCCAGACAGGTTCAGTGGCAGTGGGTCTGGGACAGACTTCACTCTCACAATCAGCAGACTGGAGCCTGAAGATTTTGCAGTGTATTATTGTCAGCAGTATGGTAGCTCACCGCTCACTTTCGGCGGAGGGACCAAGGTGGAGATCAAACG	KV3-20	KJ4	QQYGSSPLT	9	1.85185
c1973	211774	NN	ATGGAGTTTGGGCTGAGCTGGGTTTTCCTCGTTGCTCTTTTAAGAGGTGTCCAGTGTCAGGTGCCTCTGGTGGAGTCTGGGGGAGGCGTGGTCCAGCCTGGGGGGTCCCTGAGACTTTCCTGTGTAGCCTCTGGATTCAACCTCAGTACCTATGCTTTTCACTGGGTCCGCCAGGCTCCAGGCAAGGGGCTGGAGTGGGTGGCAGTTATGTCATATGATGGAAACATTAAATATTACGGAGACTCCGTGAAGGGCCGATTCACCATCTCCAGAGACAGTTCCAAGAACACACTGTATCTGCAAATGAACGGCCTGAGAACTGAAGACACGGCTTTATATTATTGTGCGAGCGGTTGGGCTCTTAATAGCCAACGAAACTTTGACTACTGGGGCCAGGGA…	IGHV3-30-3*01	IGHD2/OR15-2a*01	IGHJ4*02	ASGWALNSQRNFDY	14	6.82493	ATGAGGCTCCTTGCTCAGCTTCTGGGGCTGCTAATGCTCTGGGTCCCTGGATCCAGTGGGGATATTGTGATGACCCAGACTCCAATCTCCTCACCTGTCACCTTTGGACAGCCGGCCTCCATCTCCTGCAGGTCTAGTCAAAGCCTCGTAAAAAGTGATGGAAACACCTACTTGAGTTGGCTTCAGCAGAGGCCAGGCCAGCCTCCAAGACTCCTAATTTATAAGGTTTCTAACCGGTTTTCTGGGGTCCCAGACAGATTCAGTGGCAGTGGGGCAGGGACAGATTTCACACTGAAAATCAGCAGGGTGGAAGCTGAGGATGTCGGGATTTATTACTGCATGCAAGCTACACAATTCCCTCACACTTTTGGCCAGGGGACCAGGCTGGAGATCAAACG	KV2-24	KJ2	MQATQFPHT	9	2.67857
c1905	211774	NN	ATGGAGTTTGGGCTGAGCTGGGTTTTCCTCGTTGCTCTTTTAAGAGGTGTCCAGTGTCAGGTGCAGCTGGTGGAGTCTGCGGGAGGCGTGGTCCAGCCTGGGAGGTCCCGGAGACTCTCCTGTGTCGCCTCTGGATTCATCTTCAATAACTATGCTATGCACTGGGTCCGCCAGGCTCCAGGCAAGGGGCTGGAGTGGGTGGCAGTTATATCATATGATGGAAGCAATAAATACTACGCAGACTCCGTGAAGGGCCGATTCACCATCTCCAGAGACAATTCCAAGAACACGCTGTATCTGCAAATGAACAGCCTGACAACTGAGGACACGGCTATGTATTACTGTGCGAAAGATGATGGTAGTTTGGGGACTACGAACTTTGACTACTGGGGCCAGGGA…	IGHV3-30-3*01	IGHD3-16*01	IGHJ4*02	AKDDGSLGTTNFDY	14	3.52941	ATGGACATGAGGGTCCCCGCTCAGCTCCTGGGGCTCCTGCTGCTCTGGCTCCCAGGTGCCAAATGTGACATCCAGATGACCCAGTCTCCTTCCACCCTGTCTGCATCTGTAGGAGACAGAGTCACCATCGCTTGCCGGGCCAGTCAGACTATTACTAGCTGGTTGGCCTGGTATCAGCAGAAACCAGGGAAAGCCCCTAAGCTCCTGATCTATAAGGCGTCTAGTTTAGAAAGTGGGGTCCCATCAAGGTTCAGCGGCAGTGGATCTGGGACGGAATTCACTCTCACCATCAGCAACCTGCAGCCTGATGATTTTGCAACTTATTACTGCCAACAGTATAATAGTTATCCATTCACTTTCGGCCCTGGGACCAAAGTGGATATCAAACG	KV1-5	KJ3	QQYNSYPFT	9	1.5674
c2199	211774	NN	ATGGAGTTTGGGCTGAGCTGGGTTTTCCTCGTTGCTCTTTTAAGAGGTGTCCAGTGTCAGATGCAACTGGTGGAGTCTGGGGGAGGCGTGGTCCAGCCTGGGAGGTCCCTGAGACTCTCCTGTACAGCCTCTGGATTCCCCTTCAGTAGCAATGAAATGTTCTGGGTCCGCCAGGCTCCAGGCAAGGGGCTGGAGTGGGTGGCACTGATATCATATGATGGAGGCGATAAATACTACGCAGACTCCGTGAAGGGCCGATTCTCCGTCTCCAGAGACAATTCCAAGAACACGTTGTATCTGCAAATGAACGGCCTGAGAACTGACGACACGGCTGTATATTACTGTGCGAGAGTCCGAGCAGTGGCTGACTATTACTTTGACTGCTGGGGCCAGGGAACC…	IGHV3-30-3*01	IGHD6-19*01	IGHJ4*02	ARVRAVADYYFDC	13	6.47059	ATGGTGTTGCAGACCCAGGTCTTCATTTCTCTGTTGCTCTGGATCTCTGGTGCCTACGGGGACATCGTGATGACCCAGTCTCCAGACTCCCTGGCTGTGTCTCTGGGCGAGAGGGCCACCATCAACTGCAAGTCCAGTCAGAGTGTTTTATACAGCTCCAACAATAAGAACTACTTAGCTTGGTACCAGCAGAAACCTGGACAGCCTCCTAAGTTGCTCATTTACTGGGCATCTACCCGGGAATCCGGGGTCCCTGACCGATTCAGTGGCAGCGGGTCTGGGACAGATTTCACTCTCACCATCAGCAGCCTGCAGGCTGAAGATGTGGCAGTTTATTACTGTCAGCAATATTATCTTACTCTCCGGGTCTCCTTCGGCCAAGGGACACGACTGGAAATT…	KV4-1	KJ5	QQYYLTLRVS	10	1.8018
c1971	211774	NN	ATGGACTGGACCTGGAGGATCCTCTTCTTGGTGGCAGCAGCTACAAGTGCCCACTCCCTGAGGCAGTTGGTGCAGTCTGGGGCTGAGGTGAAGAAGCCTGGGGCCTCAGTGAAGGTCTCCTGCAAGGCTTCCGGATACACCTTCTTCAATTATGATATCGTTTGGGTGCGTCAGGCAGCTGGACAAGGGCTTGAGTGGATGGGATGGATGAGCCCTGAGAGTGGGAGCGCGGGCTATGTAGAGACGCTCCGGGGCAGAATCACCATGACCAGGGACACCTTCACAAGCACAGCCTACATGGAGTTGAGCAGCCTGAGATTTGACGACACGGCCACTTATTACTGTGCGAAAGCCCTAGGCTGGTGGCGGGCTGGAATGGATGTCTGGGGCCAAGGGACC…	IGHV1-8*01	IGHD2-8*02	IGHJ6*02	AKALGWWRAGMDV	13	10.5422	ATGGCCTGGGCTCTGCTATTCCTCACCCTCCTCATTCAGGGCACAGGGTCCTGGGCCCAGTCTGCCCTGACTCAGCCTGCCTCCGTGTCTGGGTCTCCTGGACAGTCGATCACCGTCTCCTGCACCGGAACCAGTAGTGACATTGGTGCTAATCACTATGTCTCTTGGTATCAACAATACCCAGGCGAAGCCCCCAAACTCTTGATTTATGATGTCACTTATCGGCCCTTAGAGGTTTCTAATCGCTTCTCTGGCTCCAAGTCTGGCAACACGGCCTCCCTGACCATCTCTGGGCTCCAGGCTGAGGACGAGGCTGATTATTATTGCACGTCATTTAATGGTACCGACACTGTCTTCGGAACTGGAACCAGGGTCACCGTCCTAAG	LV2-14	LJ1	TSFNGTDTV	9	9.78593
c2363	211774	NN	ATGGACTGGACCTGGAGGATCCTCTTCTTGGTGGCAGCAGCTACAAGTGCCCACTCCCAGGTGCAGCTGGTGCAGTCTGGGGCTGAGGTGAAGAAGCCTGGGGCCTCAGTGAAGGTCTCCTGCAAGGCTTCTGGATACACCTTCACCAGTTATGATATCAACTGGATGCGACAGGCCACTGGACAAGGGCTTGAGTGGATGGGATGGATGAACCCTAACAGTGGTAACACAGGCTATGCACAGAAGTTCCAGGGCAGAGTCACCATGACCAGGAACACCTCCATAAGCACAGCCTACATGGAGCTGAGCAGCCTGAGATCTGAGGACACGGCCGTGTATTACTGTGCGAGAGGCCCTACTTTCTATACTAGTGGTTATTACGGCCACTGGGGCCAGGGA…	IGHV1-8*01	IGHD3-22*01	IGHJ4*02	ARGPTFYTSGYYGH	14	0.302115	ATGACCTGCTCCCCTCTCCTCCTCACCCTTCTCATTCACTGCACAGGGTCCTGGGCCCAGTCTGTGTTGACGCAGCCGCCCTCAGTGTCTGCGGCCCCAGGACAGAAGGTCACCGTCTCCTGCTCTGGAAGCAGCTCCAACATTGGGAATAATTATGTATCCTGGTACCAGCAGCTCCCAGGAACAGCCCCCAAACTCCTCGTCTATGGAAATAATAACCGACCCTCAGGGATTCCTGACCGATTCTCTGGCTCCAGGTCTGGCACGTCAGCCACCCTGGGCATCACCGGACTCCAGACTGGGGACGAGGCCGATTATTACTGCGGAGCATGGGATAGCAGCCTAAGTGCTTGGGTGTTCGGCGGAGGGACCAAGCTGACCGTCCTAGG	LV1-51	LJ3	GAWDSSLSAWV	11	2.12121
c1865	211774	NN	ATGGACTGGACCTGGAGGATCCTCTTCTTGGTGGCAGCAGCTACAAGTGCCCACTCCCAGGTGCAGCTGGTGCAGTCTGGGGCTGAAGTGAAGAGGCCTGGGGCCTCAGTGAAGGTCTCCTGCAAGGCTTCTGGATACACTTTCACCAATAATGACATCAACTGGGTACGACAGGCCACTGGACAAGGCCTTGAGTGGCTGGCATGGATGAACCCTAACCTTGGTCACGCAGGCCTTGCGCAGAAGTTCCAGGGCAGACTCACCGTGACCAGGGACACCTCCATAAGCACAGCCTTTCTGGAATTGAGTGACCTGAGATCTGACGACACGGCCATTTATTACTGTGCGAGAGCGACCGGGGTTGCGAGCTACTACCCCTTTGACTACTGGGGCCAGGGC…	IGHV1-8*01	IGHD1-26*01	IGHJ4*02	ARATGVASYYPFDY	14	10.1493	CTGGACATGAGGGTCCCCGCTCAGCTCCTGGGGCTCCTGCTGCTCTGGCTCCCAGGTGCCAAGTGTGACATCCAGATGACCCAGTCTCCTTCCACCCTGTCTGCATCTGTGGGAGACAGAGTCACCATCACTTGCCGGGCCAGTCAGAATATTGATACTTGGTTGGCCTGGTATCAGCACAAACCGGGGAAAGCCCCTACACTCCTGATCGAAAAGGCGTCTATTTTAAGAAGTGGTGTCCCATCAAGGTTCAGCGGCAGTGGATCTGGCACAGATTTCACTCTCACCATCAGCGGCCTGCAGCCTGATGATTTTGCAACTTATTACTGCCAACAGTATGATCTTGGTACGCGGACGTTCGGCCGAGGGACCAAGGTGGAAATCCAACG	KV1-5	KJ1	QQYDLGTRT	9	6.49351
c2257	211774	NN	ATGGAGTTTGGGCTGAGCTGGGTTTTCCTCGTTGCTCTTTTAAGAGGTGTCCAGTGTCAGGTGCAGCTGGTAGAGTCTGGGGGAGCCGTGGTCCAGCCTGGGGGGTCCCTGAGACTCTCCTGTGGCGTCTCTGGATTCACCTTCAGCAGTTATGCTTTTCACTGGGTCCGCCAGGCTCCAGGCAAGGGGCCGGAGTGGGTGGCAGTTATATCATATGATGGAAGGGATAAATTCTACGCAGACTCCGTGAGGGGCCGATTCACCATCTCCAGAGACAATTCCAAGAATACGCTGTATCTGGAAATGAACAGCTTGAGAATTGAGGACACGGCTTTCTATTACTGTGCGACGGAGGCGCGGGAGAGGCTGGTATCTTGGTTCGACCCCTGGGGCCAGGGA…	IGHV3-30*04	IGHD6-19*01	IGHJ5*02	ATEARERLVSWFDP	14	6.52819	ATGGAAGCCCCAGCGCAGCTTCTCTTCCTCCTGCTACTCTGGCTCCCAGATACCACTGGAGAAGTAGTGATGACGCAGTCACCAGCCACCCTGTCTGTGTCTCCAGGGGATAGAGCCACCCTCTCCTGCAGGGCCAGTCAGAGTATTAGCAGCGACTTAGCCTGGTACCAGCAGAAACCTGGCCAGGCTCCCAGGCTCCTCATCTATGGTGCATCCACCAGGGCCACTGGTATCCCAGCCAGGTTCAGTGGCTGGGGGTCTGGAACAGAGTTCTTTCTCACCATCAGCAGCCTGCAGTCTGAAGATTTTGCAGTTTATTATTGTCTCCAGTATAAGAAGTGGCCTCCGTACACTTTTGGCCAGGGGACCAAGCTGGAGATCAGACG	KV3-15	KJ2	LQYKKWPPYT	10	4.6729
c2137	211774	NN	ATGGACTTTGGGCTGAGCTGGGTTTTCCTTGTTGCTATTATAAAAGGTGTCCAGTGTCAGGTGCAGCTGGTGGAGTCTGGGGGAGGCTTGGTCAAGCCTGGAGGGTCCCTGAGACTCTCCTGTGCAGCCTCTGGATTCACCTTCAGTAACTACTACATGAGCTGGATCCGCCAGGCTCCAGGGAAGGGGCTGGAGTGGGTTTCATACATTAGTGGTAGTAGTAGTTACACAGAGTACGCAGACTCTGTGAAGGGCCGATTCACCATCTCCAAGGACAGCGCCAAGAGCTCACTGTATCTGCAAATGAACAGCCTGAGAGTCGAGGACACGGCTGTATATTACTGTGCGAGAGTCGCGATGTTAACTGCTACCTATCCTTTTGACTACTGGGGCCGGGGA…	IGHV3-11*06	IGHD2-15*01	IGHJ4*02	ARVAMLTATYPFDY	14	3.26409	ATGGCCTGGACCGTTCTCCTCCTCGGCCTCCTCTCTCACTGCACAGACTCTGTGACCTCCTATGTGCTGACTCAGCCATCCTCAGTGTCGGTGGCCCCAGGAAAGACGGCCAAGATTACCTGTGGGGGAAACAACATTGGAAGTAAAACTGTGCACTGGTACCAGCAGAAGCCAGGCCAGGCCCCTCTTCTGGTCATCTATTATGATGCCGACCGGCCCTCAGGTATCCCTGACCGATTCTCTGGCTCCAACTCTGGGAACACGGCCACCCTGACCATCAGCACGGTCGGAGCCGGGGATGAGGCCGACTATTACTGTCAGGTGTGGGATACTACTAGTGATCATCCGATCTTCGGCGGAGGGACCAAGCTGATCGTCCTAGG	LV3-21	LJ2	QVWDTTSDHPI	11	4.6875
c1996	211774	NN	ATGGACTTTGGGCTGAGCTGGGTTTTCCTTGTTGCTATTATAAAAGGTGTCCAGTGTCAGGTGCAGCTGGTGGAGTCTGGGGGAGGCTTGGTCAAGCCTGGAGGGTCCCTGAGACTCTCCTGTGCAGCCTCTGGATTCACCTTCAGTAACTACTACATGAGCTGGATCCGCCAGGCTCCAGGGAAGGGGCTGGAGTGGGTTTCATACATTAGTGGTAGTAGTAGTTACACAGAGTACGCAGACTCTGTGAAGGGCCGATTCACCATCTCCAAGGACAGCGCCAAGAGCTCACTGTATCTGCAAATGAACAGCCTGAGAGTCGAGGACACGGCTGTATATTACTGTGCGAGAGTCGCGATGTTAACTGCTACCTATCCTTTTGACTACTGGGGCCGGGGA…	IGHV3-11*06	IGHD2-15*01	IGHJ4*02	ARVAMLTATYPFDY	14	3.26409	ATGGCCTGGACCGTTCTCCTCCTCGGCCTCCTCTCTCACTGCACAGACTCTGTGACCTCCTATGTGCTGACTCAGCCATCCTCAGTGTCGGTGGCCCCAGGAAAGACGGCCAAGATTACCTGTGGGGGAAACAACATTGGAAGTAAAACTGTGCACTGGTACCAGCAGAAGCCAGGCCAGGCCCCTCTTCTGGTCATCTATTATGATGCCGACCGGCCCTCAGGTATCCCTGACCGATTCTCTGGCTCCAACTCTGGGAACACGGCCACCCTGACCATCAGCACGGTCGGAGCCGGGGATGAGGCCGACTATTACTGTCAGGTGTGGGATACTACTAGTGATCATCCGATCTTCGGCGGAGGGACCAAGCTGATCGTCCTAGG	LV3-21	LJ2	QVWDTTSDHPI	11	4.6875
c1921	211774	NN	ATGGACTTTGGGCTGAGCTGGGTTTTCCTTGTTGCTATTATAAAAGGTGTCCAGTGTCAGGTGCAGCTGGTGGAGTCTGGGGGAGGCTTGGTCAAGCCTGGAGGGTCCCTGAGACTCTCCTGTGCAGCCTCTGGATTCACCTTCAGTAACTACTACATGAGCTGGATCCGCCAGGCTCCAGGGAAGGGGCTGGAGTGGGTTTCATACATTAGTGGTAGTAGTAGTTACACAGAGTACGCAGACTCTGTGAAGGGCCGATTCACCATCTCCAAGGACAGCGCCAAGAGCTCACTGTATCTGCAAATGAACAGCCTGAGAGTCGAGGACACGGCTGTATATTACTGTGCGAGAGTCGCGATGTTAACTGCTACCTATCCTTTTGACTACTGGGGCCGGGGA…	IGHV3-11*06	IGHD2-15*01	IGHJ4*02	ARVAMLTATYPFDY	14	3.26409	ATGGCCTGGACCGTTCTCCTCCTCGGCCTCCTCTCTCACTGCACAGACTCTGTGACCTCCTATGTGCTGACTCAGCCATCCTCAGTGTCGGTGGCCCCAGGAAAGACGGCCAAGATTACCTGTGGGGGAAACAACATTGGAAGTAAAACTGTGCACTGGTACCAGCAGAAGCCAGGCCAGGCCCCTCTTCTGGTCATCTATTATGATGCCGACCGGCCCTCAGGTATCCCTGACCGATTCTCTGGCTCCAACTCTGGGAACACGGCCACCCTGACCATCAGCACGGTCGGAGCCGGGGATGAGGCCGACTATTACTGTCAGGTGTGGGATACTACTAGTGATCATCCGATCTTCGGCGGAGGGACCAAGCTGATCGTCCTAGG	LV3-21	LJ2	QVWDTTSDHPI	11	4.6875
c2026	211774	NN	ATGGACTTTGGGCTGAGCTGGGTTTTCCTTGTTGCTATTATAAAAGGTGTCCAGTGTCAGGTGCAGCTGGTGGAGTCTGGGGGAGGCTTGGTCAAGCCTGGAGGGTCCCTGAGACTCTCCTGTGCAGCCTCTGGATTCACCTTCAGTAACTACTACATGAGCTGGATCCGCCAGGCTCCAGGGAAGGGGCTGGAGTGGGTTTCATACATTAGTGGTAGTAGTAGTTACACAGAGTACGCAGACTCTGTGAAGGGCCGATTCACCATCTCCAAGGACAGCGCCAAGAGCTCACTGTATCTGCAAATGAACAGCCTGAGAGTCGAGGACACGGCTGTATATTACTGTGCGAGAGTCGCGATGTTAACTGCTACCTATCCTTTTGACTACTGGGGCCGGGGA…	IGHV3-11*06	IGHD2-15*01	IGHJ4*02	ARVAMLTATYPFDY	14	3.26409	ATGGCCTGGACCGTTCTCCTCCTCGGCCTCCTCTCTCACTGCACAGACTCTGTGACCTCCTATGTGCTGACTCAGCCATCCTCAGTGTCGGTGGCCCCAGGAAAGACGGCCAAGATTACCTGTGGGGGAAACAACATTGGAAGTAAAACTGTGCACTGGTACCAGCAGAAGCCAGGCCAGGCCCCTCTTCTGGTCATCTATTATGATGCCGACCGGCCCTCAGGTATCCCTGACCGATTCTCTGGCTCCAACTCTGGGAACACGGCCACCCTGACCATCAGCACGGTCGGAGCCGGGGATGAGGCCGACTATTACTGTCAGGTGTGGGATACTACTAGTGATCATCCGATCTTCGGCGGAGGGACCAAGCTGATCGTCCTAGG	LV3-21	LJ2	QVWDTTSDHPI	11	4.6875
c2048	211774	NN	ATGGACTTTGGGCTGAGCTGGGTTTTCCTTGTTGCTATTATAAAAGGTGTCCAGTGTCAGGTGCAGCTGGTGGAGTCTGGGGGAGGCTTGGTCAAGCCTGGAGGGTCCCTGAGACTCTCCTGTGCAGCCTCTGGATTCACCTTCAGTAACTACTACATGAGCTGGATCCGCCAGGCTCCAGGGAAGGGGCTGGAGTGGGTTTCATACATTAGTGGTAGTAGTAGTTACACAGAGTACGCAGACTCTGTGAAGGGCCGATTCACCATCTCCAAGGACAGCGCCAAGAGCTCACTGTATCTGCAAATGAACAGCCTGAGAGTCGAGGACACGGCTGTATATTACTGTGCGAGAGTCGCGATGTTAACTGCTACCTATCCTTTTGACTACTGGGGCCGGGGA…	IGHV3-11*06	IGHD2-15*01	IGHJ4*02	ARVAMLTATYPFDY	14	3.26409	ATGGCCTGGACCGTTCTCCTCCTCGGCCTCCTCTCTCACTGCACAGACTCTGTGACCTCCTATGTGCTGACTCAGCCATCCTCAGTGTCGGTGGCCCCAGGAAAGACGGCCAAGATTACCTGTGGGGGAAACAACATTGGAAGTAAAACTGTGCACTGGTACCAGCAGAAGCCAGGCCAGGCCCCTCTTCTGGTCATCTATTATGATGCCGACCGGCCCTCAGGTATCCCTGACCGATTCTCTGGCTCCAACTCTGGGAACACGGCCACCCTGACCATCAGCACGGTCGGAGCCGGGGATGAGGCCGACTATTACTGTCAGGTGTGGGATACTACTAGTGATCATCCGATCTTCGGCGGAGGGACCAAGCTGATCGTCCTAGG	LV3-21	LJ2	QVWDTTSDHPI	11	4.6875
c2158	211774	NN	ATGGACTTTGGGCTGAGCTGGGTTTTCCTTGTTGCTATTATAAAAGGTGTCCAGTGTCAGGTGCAGCTGGTGGAGTCTGGGGGAGGCTTGGTCAAGCCTGGAGGGTCCCTGAGACTCTCCTGTGCAGCCTCTGGATTCACCTTCAGTAACTACTACATGAGCTGGATCCGCCAGGCTCCAGGGAAGGGGCTGGAGTGGGTTTCATACATTAGTGGTAGTAGTAGTTACACAGAGTACGCAGACTCTGTGAAGGGCCGATTCACCATCTCCAAGGACAGCGCCAAGAGCTCACTGTATCTGCAAATGAACAGCCTGAGAGTCGAGGACACGGCTGTATATTACTGTGCGAGAGTCGCGATGTTAACTGCTACCTATCCTTTTGACTACTGGGGCCGGGGA…	IGHV3-11*06	IGHD2-15*01	IGHJ4*02	ARVAMLTATYPFDY	14	3.26409	ATGGCCTGGACCGTTCTCCTCCTCGGCCTCCTCTCTCACTGCACAGACTCTGTGACCTCCTATGTGCTGACTCAGCCATCCTCAGTGTCGGTGGCCCCAGGAAAGACGGCCAAGATTACCTGTGGGGGAAACAACATTGGAAGTAAAACTGTGCACTGGTACCAGCAGAAGCCAGGCCAGGCCCCTCTTCTGGTCATCTATTATGATGCCGACCGGCCCTCAGGTATCCCTGACCGATTCTCTGGCTCCAACTCTGGGAACACGGCCACCCTGACCATCAGCACGGTCGGAGCCGGGGATGAGGCCGACTATTACTGTCAGGTGTGGGATACTACTAGTGATCATCCGATCTTCGGCGGAGGGACCAAGCTGATCGTCCTAGG	LV3-21	LJ2	QVWDTTSDHPI	11	4.6875
c2059	211774	NN	ATGGACTTTGGGCTGAGCTGGGTTTTCCTTGTTGCTATTATAAAAGGTGTCCAGTGTCAGGTGCAGCTGGTGGAGTCTGGGGGAGGCTTGGTCAAGCCTGGAGGGTCCCTGAGACTCTCCTGTGCAGCCTCTGGATTCACCTTCAGTAACTACTACATGAGCTGGATCCGCCAGGCTCCAGGGAAGGGGCTGGAGTGGGTTTCATACATTAGTGGTAGTAGTAGTTACACAGAGTACGCAGACTCTGTGAAGGGCCGATTCACCATCTCCAAGGACAGCGCCAAGAGCTCACTGTATCTGCAAATGAACAGCCTGAGAGTCGAGGACACGGCTGTATATTACTGTGCGAGAGTCGCGATGTTAACTGCTACCTATCCTTTTGACTACTGGGGCCGGGGA…	IGHV3-11*06	IGHD2-15*01	IGHJ4*02	ARVAMLTATYPFDY	14	3.26409	ATGGCCTGGACCGTTCTCCTCCTCGGCCTCCTCTCTCACTGCACAGACTCTGTGACCTCCTATGTGCTGACTCAGCCATCCTCAGTGTCGGTGGCCCCAGGAAAGACGGCCAAGATTACCTGTGGGGGAAACAACATTGGAAGTAAAACTGTGCACTGGTACCAGCAGAAGCCAGGCCAGGCCCCTCTTCTGGTCATCTATTATGATGCCGACCGGCCCTCAGGTATCCCTGACCGATTCTCTGGCTCCAACTCTGGGAACACGGCCACCCTGACCATCAGCACGGTCGGAGCCGGGGATGAGGCCGACTATTACTGTCAGGTGTGGGATACTACTAGTGATCATCCGATCTTCGGCGGAGGGACCAAGCTGATCGTCCTAGG	LV3-21	LJ2	QVWDTTSDHPI	11	4.6875
c1836	211774	NN	ATGGACTTTGGGCTGAGCTGGGTTTTCCTTGTTGCTATTATAAAAGGTGTCCAGTGTCAGGTGCAGCTGGTGGAGTCTGGGGGAGGCTTGGTCAAGCCTGGAGGGTCCCTGAGACTCTCCTGTGCAGCCTCTGGATTCACCTTCAGTAACTACTACATGAGCTGGATCCGCCAGGCTCCAGGGAAGGGGCTGGAGTGGGTTTCATACATTAGTGGTAGTAGTAGTTACACAGAGTACGCAGACTCTGTGAAGGGCCGATTCACCATCTCCAAGGACAGCGCCAAGAGCTCACTGTATCTGCAAATGAACAGCCTGAGAGTCGAGGACACGGCTGTATATTACTGTGCGAGAGTCGCGATGTTAACTGCTACCTATCCTTTTGACTACTGGGGCCGGGGA…	IGHV3-11*06	IGHD2-15*01	IGHJ4*02	ARVAMLTATYPFDY	14	3.26409	ATGGCCTGGACCGTTCTCCTCCTCGGCCTCCTCTCTCACTGCACAGACTCTGTGACCTCCTATGTGCTGACTCAGCCATCCTCAGTGTCGGTGGCCCCAGGAAAGACGGCCAAGATTACCTGTGGGGGAAACAACATTGGAAGTAAAACTGTGCACTGGTACCAGCAGAAGCCAGGCCAGGCCCCTCTTCTGGTCATCTATTATGATGCCGACCGGCCCTCAGGTATCCCTGACCGATTCTCTGGCTCCAACTCTGGGAACACGGCCACCCTGACCATCAGCACGGTCGGAGCCGGGGATGAGGCCGACTATTACTGTCAGGTGTGGGATACTACTAGTGATCATCCGATCTTCGGCGGAGGGACCAAGCTGATCGTCCTAGG	LV3-21	LJ2	QVWDTTSDHPI	11	4.6875
c2117	211774	NN	ATGGACTTTGGGCTGAGCTGGGTTTTCCTTGTTGCTATTATAAAAGGTGTCCAGTGTCAGGTGCAGCTGGTGGAGTCTGGGGGAGGCTTGGTCAAGCCTGGAGGGTCCCTGAGACTCTCCTGTGCAGCCTCTGGATTCACCTTCAGTAACTACTACATGAGCTGGATCCGCCAGGCTCCAGGGAAGGGGCTGGAGTGGGTTTCATACATTAGTGGTAGTAGTAGTTACACAGAGTACGCAGACTCTGTGAAGGGCCGATTCACCATCTCCAAGGACAGCGCCAAGAGCTCACTGTATCTGCAAATGAACAGCCTGAGAGTCGAGGACACGGCTGTATATTACTGTGCGAGAGTCGCGATGTTAACTGCTACCTATCCTTTTGACTACTGGGGCCGGGGA…	IGHV3-11*06	IGHD2-15*01	IGHJ4*02	ARVAMLTATYPFDY	14	3.26409	ATGGCCTGGACCGTTCTCCTCCTCGGCCTCCTCTCTCACTGCACAGACTCTGTGACCTCCTATGTGCTGACTCAGCCATCCTCAGTGTCGGTGGCCCCAGGAAAGACGGCCAAGATTACCTGTGGGGGAAACAACATTGGAAGTAAAACTGTGCACTGGTACCAGCAGAAGCCAGGCCAGGCCCCTCTTCTGGTCATCTATTATGATGCCGACCGGCCCTCAGGTATCCCTGACCGATTCTCTGGCTCCAACTCTGGGAACACGGCCACCCTGACCATCAGCACGGTCGGAGCCGGGGATGAGGCCGACTATTACTGTCAGGTGTGGGATACTACTAGTGATCATCCGATCTTCGGCGGAGGGACCAAGCTGATCGTCCTAGG	LV3-21	LJ2	QVWDTTSDHPI	11	4.6875
c2205	211774	NN	ATGGACTTTGGGCTGAGCTGGGTTTTCCTTGTTGCTATTATAAAAGGTGTCCAGTGTCAGGTGCAGCTGGTGGAGTCTGGGGGAGGCTTGGTCAAGCCTGGAGGGTCCCTGAGACTCTCCTGTGCAGCCTCTGGATTCACCTTCAGTAACTACTACATGAGCTGGATCCGCCAGGCTCCAGGGAAGGGGCTGGAGTGGGTTTCATACATTAGTGGTAGTAGTAGTTACACAGAGTACGCAGACTCTGTGAAGGGCCGATTCACCATCTCCAAGGACAGCGCCAAGAGCTCACTGTATCTGCAAATGAACAGCCTGAGAGTCGAGGACACGGCTGTATATTACTGTGCGAGAGTCGCGATGTTAACTGCTACCTATCCTTTTGACTACTGGGGCCGGGGA…	IGHV3-11*06	IGHD2-15*01	IGHJ4*02	ARVAMLTATYPFDY	14	3.26409	ATGGCCTGGACCGTTCTCCTCCTCGGCCTCCTCTCTCACTGCACAGACTCTGTGACCTCCTATGTGCTGACTCAGCCATCCTCAGTGTCGGTGGCCCCAGGAAAGACGGCCAAGATTACCTGTGGGGGAAACAACATTGGAAGTAAAACTGTGCACTGGTACCAGCAGAAGCCAGGCCAGGCCCCTCTTCTGGTCATCTATTATGATGCCGACCGGCCCTCAGGTATCCCTGACCGATTCTCTGGCTCCAACTCTGGGAACACGGCCACCCTGACCATCAGCACGGTCGGAGCCGGGGATGAGGCCGACTATTACTGTCAGGTGTGGGATACTACTAGTGATCATCCGATCTTCGGCGGAGGGACCAAGCTGATCGTCCTAGG	LV3-21	LJ2	QVWDTTSDHPI	11	4.6875
c2343	211774	NN	ATGGACTTTGGGCTGAGCTGGGTTTTCCTTGTTGCTATTATAAAAGGTGTCCAGTGTCAGGTGCAGCTGGTGGAGTCTGGGGGAGGCTTGGTCAAGCCTGGAGGGTCCCTGAGACTCTCCTGTGCAGCCTCTGGATTCACCTTCAGTAACTACTACATGAGCTGGATCCGCCAGGCTCCAGGGAAGGGGCTGGAGTGGGTTTCATACATTAGTGGTAGTAGTAGTTACACAGAGTACGCAGACTCTGTGAAGGGCCGATTCACCATCTCCAAGGACAGCGCCAAGAGCTCACTGTATCTGCAAATGAACAGCCTGAGAGTCGAGGACACGGCTGTATATTACTGTGCGAGAGTCGCGATGTTAACTGCTACCTATCCTTTTGACTACTGGGGCCGGGGA…	IGHV3-11*06	IGHD2-15*01	IGHJ4*02	ARVAMLTATYPFDY	14	3.26409	ATGGCCTGGACCGTTCTCCTCCTCGGCCTCCTCTCTCACTGCACAGACTCTGTGACCTCCTATGTGCTGACTCAGCCATCCTCAGTGTCGGTGGCCCCAGGAAAGACGGCCAAGATTACCTGTGGGGGAAACAACATTGGAAGTAAAACTGTGCACTGGTACCAGCAGAAGCCAGGCCAGGCCCCTCTTCTGGTCATCTATTATGATGCCGACCGGCCCTCAGGTATCCCTGACCGATTCTCTGGCTCCAACTCTGGGAACACGGCCACCCTGACCATCAGCACGGTCGGAGCCGGGGATGAGGCCGACTATTACTGTCAGGTGTGGGATACTACTAGTGATCATCCGATCTTCGGCGGAGGGACCAAGCTGATCGTCCTAGG	LV3-21	LJ2	QVWDTTSDHPI	11	4.6875
c1875	211774	NN	ATGGACTTTGGGCTGAGCTGGGTTTTCCTTGTTGCTATTATAAAAGGTGTCCAGTGTCAGGTGCAGCTGGTGGAGTCTGGGGGAGGCTTGGTCAAGCCTGGAGGGTCCCTGAGACTCTCCTGTGCAGCCTCTGGATTCACCTTCAGTAACTACTACATGAGCTGGATCCGCCAGGCTCCAGGGAAGGGGCTGGAGTGGGTTTCATACATTAGTGGTAGTAGTAGTTACACAGAGTACGCAGACTCTGTGAAGGGCCGATTCACCATCTCCAAGGACAGCGCCAAGAGCTCACTGTATCTGCAAATGAACAGCCTGAGAGTCGAGGACACGGCTGTATATTACTGTGCGAGAGTCGCGATGTTAACTGCTACCTATCCTTTTGACTACTGGGGCCGGGGA…	IGHV3-11*06	IGHD2-15*01	IGHJ4*02	ARVAMLTATYPFDY	14	3.26409	ATGGCCTGGACCGTTCTCCTCCTCGGCCTCCTCTCTCACTGCACAGACTCTGTGACCTCCTATGTGCTGACTCAGCCATCCTCAGTGTCGGTGGCCCCAGGAAAGACGGCCAAGATTACCTGTGGGGGAAACAACATTGGAAGTAAAACTGTGCACTGGTACCAGCAGAAGCCAGGCCAGGCCCCTCTTCTGGTCATCTATTATGATGCCGACCGGCCCTCAGGTATCCCTGACCGATTCTCTGGCTCCAACTCTGGGAACACGGCCACCCTGACCATCAGCACGGTCGGAGCCGGGGATGAGGCCGACTATTACTGTCAGGTGTGGGATACTACTAGTGATCATCCGATCTTCGGCGGAGGGACCAAGCTGATCGTCCTAGG	LV3-21	LJ3	QVWDTTSDHPI	11	4.6875
c2231	211774	NN	ATGGACTTTGGGCTGAGCTGGGTTTTCCTTGTTGCTATTATAAAAGGTGTCCAGTGTCAGGTGCAGCTGGTGGAGTCTGGGGGAGGCTTGGTCAAGCCTGGAGGGTCCCTGAGACTCTCCTGTGCAGCCTCTGGATTCACCTTCAGTAACTACTACATGAGCTGGATCCGCCAGGCTCCAGGGAAGGGGCTGGAGTGGGTTTCATACATTAGTGGTAGTAGTAGTTACACAGAGTACGCAGACTCTGTGAAGGGCCGATTCACCATCTCCAAGGACAGCGCCAAGAGCTCACTGTATCTGCAAATGAACAGCCTGAGAGTCGAGGACACGGCTGTATATTACTGTGCGAGAGTCGCGATGTTAACTGCTACCTATCCTTTTGACTACTGGGGCCGGGGA…	IGHV3-11*06	IGHD2-15*01	IGHJ4*02	ARVAMLTATYPFDY	14	3.26409	ATGGCCTGGACCGTTCTCCTCCTCGGCCTCCTCTCTCACTGCACAGACTCTGTGACCTCCTATGTGCTGACTCAGCCATCCTCAGTGTCGGTGGCCCCAGGAAAGACGGCCAAGATTACCTGTGGGGGAAACAACATTGGAAGTAAAACTGTGCACTGGTACCAGCAGAAGCCAGGCCAGGCCCCTCTTCTGGTCATCTATTATGATGCCGACCGGCCCTCAGGTATCCCTGACCGATTCTCTGGCTCCAACTCTGGGAACACGGCCACCCTGACCATCAGCACGGTCGGAGCCGGGGATGAGGCCGACTATTACTGTCAGGTGTGGGATACTACTAGTGATCATCCGATCTTCGGCGGAGGGACCAAGCTGATCGTCCTAGG	LV3-21	LJ3	QVWDTTSDHPI	11	4.6875
c2126	211774	NN	ATGGACTTTGGGCTGAGCTGGGTTTTCCTTGTTGCTATTATAAAAGGTGTCCAGTGTCAGGTGCAGCTGGTGGAGTCTGGGGGAGGCTTGGTCAAGCCTGGAGGGTCCCTGAGACTCTCCTGTGCAGCCTCTGGATTCACCTTCAGTAACTACTACATGAGCTGGATCCGCCAGGCTCCAGGGAAGGGGCTGGAGTGGGTTTCATACATTAGTGGTAGTAGTAGTTACACAGAGTACGCAGACTCTGTGAAGGGCCGATTCACCATCTCCAAGGACAGCGCCAAGAGCTCACTGTATCTGCAAATGAACAGCCTGAGAGTCGAGGACACGGCTGTATATTACTGTGCGAGAGTCGCGATGTTAACTGCTACCTATCCTTTTGACTACTGGGGCCGGGGA…	IGHV3-11*06	IGHD2-15*01	IGHJ4*02	ARVAMLTATYPFDY	14	3.26409	ATGGCCTGGACCGTTCTCCTCCTCGGCCTCCTCTCTCACTGCACAGACTCTGTGACCTCCTATGTGCTGACTCAGCCATCCTCAGTGTCGGTGGCCCCAGGAAAGACGGCCAAGATTACCTGTGGGGGAAACAACATTGGAAGTAAAACTGTGCACTGGTACCAGCAGAAGCCAGGCCAGGCCCCTCTTCTGGTCATCTATTATGATGCCGACCGGCCCTCAGGTATCCCTGACCGATTCTCTGGCTCCAACTCTGGGAACACGGCCACCCTGACCATCAGCACGGTCGGAGCCGGGGATGAGGCCGACTATTACTGTCAGGTGTGGGATACTACTAGTGATCATCCGATCTTCGGCGGAGGGACCAAGCTGATCGTCCTAGG	LV3-21	LJ3	QVWDTTSDHPI	11	4.6875
c1940	211774	NN	ATGGACTTTGGGCTGAGCTGGGTTTTCCTTGTTGCTATTATAAAAGGTGTCCAGTGTCAGGTGCAGCTGGTGGAGTCTGGGGGAGGCTTGGTCAAGCCTGGAGGGTCCCTGAGACTCTCCTGTGCAGCCTCTGGATTCACCTTCAGTAACTACTACATGAGCTGGATCCGCCAGGCTCCAGGGAAGGGGCTGGAGTGGGTTTCATACATTAGTGGTAGTAGTAGTTACACAGAGTACGCAGACTCTGTGAAGGGCCGATTCACCATCTCCAAGGACAGCGCCAAGAGCTCACTGTATCTGCAAATGAACAGCCTGAGAGTCGAGGACACGGCTGTATATTACTGTGCGAGAGTCGCGATGTTAACTGCTACCTATCCTTTTGACTACTGGGGCCGGGGA…	IGHV3-11*06	IGHD2-15*01	IGHJ4*02	ARVAMLTATYPFDY	14	3.26409	ATGGCCTGGACCGTTCTCCTCCTCGGCCTCCTCTCTCACTGCACAGACTCTGTGACCTCCTATGTGCTGACTCAGCCATCCTCAGTGTCGGTGGCCCCAGGAAAGACGGCCAAGATTACCTGTGGGGGAAACAACATTGGAAGTAAAACTGTGCACTGGTACCAGCAGAAGCCAGGCCAGGCCCCTCTTCTGGTCATCTATTATGATGCCGACCGGCCCTCAGGTATCCCTGACCGATTCTCTGGCTCCAACTCTGGGAACACGGCCACCCTGACCATCAGCACGGTCGGAGCCGGGGATGAGGCCGACTATTACTGTCAGGTGTGGGATACTACTAGTGATCATCCGATCTTCGGCGGAGGGACCAAGCTGATCGTCCTAGG	LV3-21	LJ3	QVWDTTSDHPI	11	4.6875
c1942	211774	NN	ATGGACTTTGGGCTGAGCTGGGTTTTCCTTGTTGCTATTATAAAAGGTGTCCAGTGTCAGGTGCAGCTGGTGGAGTCTGGGGGAGGCTTGGTCAAGCCTGGAGGGTCCCTGAGACTCTCCTGTGCAGCCTCTGGATTCACCTTCAGTAACTACTACATGAGCTGGATCCGCCAGGCTCCAGGGAAGGGGCTGGAGTGGGTTTCATACATTAGTGGTAGTAGTAGTTACACAGAGTACGCAGACTCTGTGAAGGGCCGATTCACCATCTCCAAGGACAGCGCCAAGAGCTCACTGTATCTGCAAATGAACAGCCTGAGAGTCGAGGACACGGCTGTATATTACTGTGCGAGAGTCGCGATGTTAACTGCTACCTATCCTTTTGACTACTGGGGCCGGGGA…	IGHV3-11*06	IGHD2-15*01	IGHJ4*02	ARVAMLTATYPFDY	14	3.26409	ATGGCCTGGACCGTTCTCCTCCTCGGCCTCCTCTCTCACTGCACAGACTCTGTGACCTCCTATGTGCTGACTCAGCCATCCTCAGTGTCGGTGGCCCCAGGAAAGACGGCCAAGATTACCTGTGGGGGAAACAACATTGGAAGTAAAACTGTGCACTGGTACCAGCAGAAGCCAGGCCAGGCCCCTCTTCTGGTCATCTATTATGATGCCGACCGGCCCTCAGGTATCCCTGACCGATTCTCTGGCTCCAACTCTGGGAACACGGCCACCCTGACCATCAGCACGGTCGGAGCCGGGGATGAGGCCGACTATTACTGTCAGGTGTGGGATACTACTAGTGATCATCCGATCTTCGGCGGAGGGACCAAGCTGATCGTCCTAGG	LV3-21	LJ3	QVWDTTSDHPI	11	4.6875
c1807	211774	NN	ATGGACTTTGGGCTGAGCTGGGTTTTCCTTGTTGCTATTATAAAAGGTGTCCAGTGTCAGGTGCAGCTGGTGGAGTCTGGGGGAGGCTTGGTCAAGCCTGGAGGGTCCCTGAGACTCTCCTGTGCAGCCTCTGGATTCACCTTCAGTAACTACTACATGAGCTGGATCCGCCAGGCTCCAGGGAAGGGGCTGGAGTGGGTTTCATACATTAGTGGTAGTAGTAGTTACACAGAGTACGCAGACTCTGTGAAGGGCCGATTCACCATCTCCAAGGACAGCGCCAAGAGCTCACTGTATCTGCAAATGAACAGCCTGAGAGTCGAGGACACGGCTGTATATTACTGTGCGAGAGTCGCGATGTTAACTGCTACCTATCCTTTTGACTACTGGGGCCGGGGA…	IGHV3-11*06	IGHD2-15*01	IGHJ4*02	ARVAMLTATYPFDY	14	3.26409	ATGGCCTGGACCGTTCTCCTCCTCGGCCTCCTCTCTCACTGCACAGACTCTGTGACCTCCTATGTGCTGACTCAGCCATCCTCAGTGTCGGTGGCCCCAGGAAAGACGGCCAAGATTACCTGTGGGGGAAACAACATTGGAAGTAAAACTGTGCACTGGTACCAGCAGAAGCCAGGCCAGGCCCCTCTTCTGGTCATCTATTATGATGCCGACCGGCCCTCAGGTATCCCTGACCGATTCTCTGGCTCCAACTCTGGGAACACGGCCACCCTGACCATCAGCACGGTCGGAGCCGGGGATGAGGCCGACTATTACTGTCAGGTGTGGGATACTACTAGTGATCATCCGATCTTCGGCGGAGGGACCAAGCTGATCGTCCTAGG	LV3-21	LJ3	QVWDTTSDHPI	11	4.6875
c2214	211774	NN	ATGGACTTTGGGCTGAGCTGGGTTTTCCTTGTTGCTATTATAAAAGGTGTCCAGTGTCAGGTGCAGCTGGTGGAGTCTGGGGGAGGCTTGGTCAAGCCTGGAGGGTCCCTGAGACTCTCCTGTGCAGCCTCTGGATTCACCTTCAGTAACTACTACATGAGCTGGATCCGCCAGGCTCCAGGGAAGGGGCTGGAGTGGGTTTCATACATTAGTGGTAGTAGTAGTTACACAGAGTACGCAGACTCTGTGAAGGGCCGATTCACCATCTCCAAGGACAGCGCCAAGAGCTCACTGTATCTGCAAATGAACAGCCTGAGAGTCGAGGACACGGCTGTATATTACTGTGCGAGAGTCGCGATGTTAACTGCTACCTATCCTTTTGACTACTGGGGCCGGGGA…	IGHV3-11*06	IGHD2-15*01	IGHJ4*02	ARVAMLTATYPFDY	14	3.26409	ATGGCCTGGACCGTTCTCCTCCTCGGCCTCCTCTCTCACTGCACAGACTCTGTGACCTCCTATGTGCTGACTCAGCCATCCTCAGTGTCGGTGGCCCCAGGAAAGACGGCCAAGATTACCTGTGGGGGAAACAACATTGGAAGTAAAACTGTGCACTGGTACCAGCAGAAGCCAGGCCAGGCCCCTCTTCTGGTCATCTATTATGATGCCGACCGGCCCTCAGGTATCCCTGACCGATTCTCTGGCTCCAACTCTGGGAACACGGCCACCCTGACCATCAGCACGGTCGGAGCCGGGGATGAGGCCGACTATTACTGTCAGGTGTGGGATACTACTAGTGATCATCCGATCTTCGGCGGAGGGACCAAGCTGATCGTCCTAGG	LV3-21	LJ3	QVWDTTSDHPI	11	4.6875
c1995	211774	NN	ATGGACTTTGGGCTGAGCTGGGTTTTCCTTGTTGCTATTATAAAAGGTGTCCAGTGTCAGGTGCAGCTGGTGGAGTCTGGGGGAGGCTTGGTCAAGCCTGGAGGGTCCCTGAGACTCTCCTGTGCAGCCTCTGGATTCACCTTCAGTAACTACTACATGAGCTGGATCCGCCAGGCTCCAGGGAAGGGGCTGGAGTGGGTTTCATACATTAGTGGTAGTAGTAGTTACACAGAGTACGCAGACTCTGTGAAGGGCCGATTCACCATCTCCAAGGACAGCGCCAAGAGCTCACTGTATCTGCAAATGAACAGCCTGAGAGTCGAGGACACGGCTGTATATTACTGTGCGAGAGTCGCGATGTTAACTGCTACCTATCCTTTTGACTACTGGGGCCGGGGA…	IGHV3-11*06	IGHD2-15*01	IGHJ4*02	ARVAMLTATYPFDY	14	3.26409	ATGGCCTGGACCGTTCTCCTCCTCGGCCTCCTCTCTCACTGCACAGACTCTGTGACCTCCTATGTGCTGACTCAGCCATCCTCAGTGTCGGTGGCCCCAGGAAAGACGGCCAAGATTACCTGTGGGGGAAACAACATTGGAAGTAAAACTGTGCACTGGTACCAGCAGAAGCCAGGCCAGGCCCCTCTTCTGGTCATCTATTATGATGCCGACCGGCCCTCAGGTATCCCTGACCGATTCTCTGGCTCCAACTCTGGGAACACGGCCACCCTGACCATCAGCACGGTCGGAGCCGGGGATGAGGCCGACTATTACTGTCAGGTGTGGGATACTACTAGTGATCATCCGATCTTCGGCGGAGGGACCAAGCTGATCGTCCTAGG	LV3-21	LJ3	QVWDTTSDHPI	11	4.6875
c1852	211774	NN	ATGGACTTTGGGCTGAGCTGGGTTTTCCTTGTTGCTATTATAAAAGGTGTCCAGTGTCAGGTGCAGCTGGTGGAGTCTGGGGGAGGCTTGGTCAAGCCTGGAGGGTCCCTGAGACTCTCCTGTGCAGCCTCTGGATTCACCTTCAGTAACTACTACATGAGCTGGATCCGCCAGGCTCCAGGGAAGGGGCTGGAGTGGGTTTCATACATTAGTGGTAGTAGTAGTTACACAGAGTACGCAGACTCTGTGAAGGGCCGATTCACCATCTCCAAGGACAGCGCCAAGAGCTCACTGTATCTGCAAATGAACAGCCTGAGAGTCGAGGACACGGCTGTATATTACTGTGCGAGAGTCGCGATGTTAACTGCTACCTATCCTTTTGACTACTGGGGCCGGGGA…	IGHV3-11*06	IGHD2-15*01	IGHJ4*02	ARVAMLTATYPFDY	14	3.26409	ATGGCCTGGACCGTTCTCCTCCTCGGCCTCCTCTCTCACTGCACAGACTCTGTGACCTCCTATGTGCTGACTCAGCCATCCTCAGTGTCGGTGGCCCCAGGAAAGACGGCCAAGATTACCTGTGGGGGAAACAACATTGGAAGTAAAACTGTGCACTGGTACCAGCAGAAGCCAGGCCAGGCCCCTCTTCTGGTCATCTATTATGATGCCGACCGGCCCTCAGGTATCCCTGACCGATTCTCTGGCTCCAACTCTGGGAACACGGCCACCCTGACCATCAGCACGGTCGGAGCCGGGGATGAGGCCGACTATTACTGTCAGGTGTGGGATACTACTAGTGATCATCCGATCTTCGGCGGAGGGACCAAGCTGATCGTCCTAGG	LV3-21	LJ3	QVWDTTSDHPI	11	4.6875
c2190	211774	NN	ATGGACTTTGGGCTGAGCTGGGTTTTCCTTGTTGCTATTATAAAAGGTGTCCAGTGTCAGGTGCAGCTGGTGGAGTCTGGGGGAGGCTTGGTCAAGCCTGGAGGGTCCCTGAGACTCTCCTGTGCAGCCTCTGGATTCACCTTCAGTAACTACTACATGAGCTGGATCCGCCAGGCTCCAGGGAAGGGGCTGGAGTGGGTTTCATACATTAGTGGTAGTAGTAGTTACACAGAGTACGCAGACTCTGTGAAGGGCCGATTCACCATCTCCAAGGACAGCGCCAAGAGCTCACTGTATCTGCAAATGAACAGCCTGAGAGTCGAGGACACGGCTGTATATTACTGTGCGAGAGTCGCGATGTTAACTGCTACCTATCCTTTTGACTACTGGGGCCGGGGA…	IGHV3-11*06	IGHD2-15*01	IGHJ4*02	ARVAMLTATYPFDY	14	3.26409	ATGGCCTGGACCGTTCTCCTCCTCGGCCTCCTCTCTCACTGCACAGACTCTGTGACCTCCTATGTGCTGACTCAGCCATCCTCAGTGTCGGTGGCCCCAGGAAAGACGGCCAAGATTACCTGTGGGGGAAACAACATTGGAAGTAAAACTGTGCACTGGTACCAGCAGAAGCCAGGCCAGGCCCCTCTTCTGGTCATCTATTATGATGCCGACCGGCCCTCAGGTATCCCTGACCGATTCTCTGGCTCCAACTCTGGGAACACGGCCACCCTGACCATCAGCACGGTCGGAGCCGGGGATGAGGCCGACTATTACTGTCAGGTGTGGGATACTACTAGTGATCATCCGATCTTCGGCGGAGGGACCAAGCTGATCGTCCTAGG	LV3-21	LJ3	QVWDTTSDHPI	11	4.6875
c2234	211774	NN	ATGGACTTTGGGCTGAGCTGGGTTTTCCTTGTTGCTATTATAAAAGGTGTCCAGTGTCAGGTGCAGCTGGTGGAGTCTGGGGGAGGCTTGGTCAAGCCTGGAGGGTCCCTGAGACTCTCCTGTGCAGCCTCTGGATTCACCTTCAGTAACTACTACATGAGCTGGATCCGCCAGGCTCCAGGGAAGGGGCTGGAGTGGGTTTCATACATTAGTGGTAGTAGTAGTTACACAGAGTACGCAGACTCTGTGAAGGGCCGATTCACCATCTCCAAGGACAGCGCCAAGAGCTCACTGTATCTGCAAATGAACAGCCTGAGAGTCGAGGACACGGCTGTATATTACTGTGCGAGAGTCGCGATGTTAACTGCTACCTATCCTTTTGACTACTGGGGCCGGGGA…	IGHV3-11*06	IGHD2-15*01	IGHJ4*02	ARVAMLTATYPFDY	14	3.26409	ATGGCCTGGACCGTTCTCCTCCTCGGCCTCCTCTCTCACTGCACAGACTCTGTGACCTCCTATGTGCTGACTCAGCCATCCTCAGTGTCGGTGGCCCCAGGAAAGACGGCCAAGATTACCTGTGGGGGAAACAACATTGGAAGTAAAACTGTGCACTGGTACCAGCAGAAGCCAGGCCAGGCCCCTCTTCTGGTCATCTATTATGATGCCGACCGGCCCTCAGGTATCCCTGACCGATTCTCTGGCTCCAACTCTGGGAACACGGCCACCCTGACCATCAGCACGGTCGGAGCCGGGGATGAGGCCGACTATTACTGTCAGGTGTGGGATACTACTAGTGATCATCCGATCTTCGGCGGAGGGACCAAGCTGATCGTCCTAGG	LV3-21	LJ3	QVWDTTSDHPI	11	4.6875
c2130	211774	NN	ATGGACTTTGGGCTGAGCTGGGTTTTCCTTGTTGCTATTATAAAAGGTGTCCAGTGTCAGGTGCAGCTGGTGGAGTCTGGGGGAGGCTTGGTCAAGCCTGGAGGGTCCCTGAGACTCTCCTGTGCAGCCTCTGGATTCACCTTCAGTAACTACTACATGAGCTGGATCCGCCAGGCTCCAGGGAAGGGGCTGGAGTGGGTTTCATACATTAGTGGTAGTAGTAGTTACACAGAGTACGCAGACTCTGTGAAGGGCCGATTCACCATCTCCAAGGACAGCGCCAAGAGCTCACTGTATCTGCAAATGAACAGCCTGAGAGTCGAGGACACGGCTGTATATTACTGTGCGAGAGTCGCGATGTTAACTGCTACCTATCCTTTTGACTACTGGGGCCGGGGA…	IGHV3-11*06	IGHD2-15*01	IGHJ4*02	ARVAMLTATYPFDY	14	3.26409	ATGGCCTGGACCGTTCTCCTCCTCGGCCTCCTCTCTCACTGCACAGACTCTGTGACCTCCTATGTGCTGACTCAGCCATCCTCAGTGTCGGTGGCCCCAGGAAAGACGGCCAAGATTACCTGTGGGGGAAACAACATTGGAAGTAAAACTGTGCACTGGTACCAGCAGAAGCCAGGCCAGGCCCCTCTTCTGGTCATCTATTATGATGCCGACCGGCCCTCAGGTATCCCTGACCGATTCTCTGGCTCCAACTCTGGGAACACGGCCACCCTGACCATCAGCACGGTCGGAGCCGGGGATGAGGCCGACTATTACTGTCAGGTGTGGGATACTACTAGTGATCATCCGATCTTCGGCGGAGGGACCAAGCTGATCGTCCTAGG	LV3-21	LJ3	QVWDTTSDHPI	11	4.6875
c2360	211774	NN	ATGGAGTTTGGGCTGAGCTGGGTTTTCCTTGTTGCTATTATAAAAGGTGTCCAGTGTCAGGTGCAGCTGGTGGAGTCTGGGGGAGGCTTGGTCAAGCCTGGAGGGTCCCTGAGACTCTCCTGTGCAGCCTCTGGATTCACCTTCAGTGACTACGACATGAGCTGGATCCGCCAGGCTCCAGGGAAGGGGCTGGAGTGGGTTTCATACATTAGTAGTAGGGGTAGTTACACAAACTACGCAGACTCTGTGAAGGGCCGATTCACCATCTCCAGAGACAACGCCAAGAACTCACTGTATCTGCAAATGAACAGCCTGAGAGCCGTGGACACGGCTGTGTATTACTGTGCGAGAGACAGGTTTGGGGCACGGGGTGACTACTGGGGCCAGGGAACCCTGGTC…	IGHV3-11*06	IGHD3-16*01	IGHJ4*02	ARDRFGARGDY	11	1.19048	ATGGCCTGGGCTCTGCTATTCCTCACCCTCCTCACTCAGGGCACAGGGTCCTGGGCCCAGTCTGCCCTGACTCAGCCTGCCTCCGTGTCTGGATCTCCTGGACAGTCGATCACCATCTCCTGCAGTGGAACCACCAGTGACATTAGTGGTTATAACTATGTCTCCTGGTACCAACAACACCCAGGCAAAGCCCCCAAACTCATGATTTATGATGTCAGTAATCGGCCCTCAGGGGTTTCTAATCGCTTCTCTGGCTCCAAGTCTGGCAACACGGCCTCCCTGACCATCTCTGGGCTCCAGGCTGAGGACGAGGCTGATTATTACTGCAGCTCATATACAAGCAGCAGCTCTCCGGTATTCGGCGGAGGGACCAAGCTGACCGTCCTAGG	LV2-14	LJ2	SSYTSSSSPV	10	2.43161
c2256	211774	NN	ATGGAGTTTGGGCTGAGCTGGGTTTTCCTTGTTGCTATTATAAAAGGTGTCCAGTGTCAGGTGCAGCTGGTGGAGTCTGGGGGAGGCTTGGTCAAGCCTGGAGGGTCCCTGAGACTCTCCTGTGCAGCCTCTGGATTCACCTTCAGTGACTACGACATGAGCTGGATCCGCCAGGCTCCAGGGAAGGGGCTGGAGTGGGTTTCATACATTAGTAGTAGGGGTAGTTACACAAACTACGCAGACTCTGTGAAGGGCCGATTCACCATCTCCAGAGACAACGCCAAGAACTCACTGTATCTGCAAATGAACAGCCTGAGAGCCGTGGACACGGCTGTGTATTACTGTGCGAGAGACAGGTTTGGGGCACGGGGTGACTACTGGGGCCAGGGAACCCTGGTC…	IGHV3-11*06	IGHD3-16*01	IGHJ4*02	ARDRFGARGDY	11	1.19048	ATGGCCTGGGCTCTGCTATTCCTCACCCTCCTCACTCAGGGCACAGGGTCCTGGGCCCAGTCTGCCCTGACTCAGCCTGCCTCCGTGTCTGGATCTCCTGGACAGTCGATCACCATCTCCTGCAGTGGAACCACCAGTGACATTAGTGGTTATAACTATGTCTCCTGGTACCAACAACACCCAGGCAAAGCCCCCAAACTCATGATTTATGATGTCAGTAATCGGCCCTCAGGGGTTTCTAATCGCTTCTCTGGCTCCAAGTCTGGCAACACGGCCTCCCTGACCATCTCTGGGCTCCAGGCTGAGGACGAGGCTGATTATTACTGCAGCTCATATACAAGCAGCAGCTCTCCGGTATTCGGCGGAGGGACCAAGCTGACCGTCCTAGG	LV2-14	LJ2	SSYTSSSSPV	10	2.43161
c2188	211774	NN	ATGGACTGGACCTGGAGGTTCCTCTTTGTGGTGGCAGCAGCTACAGGTGTCCAGTCCCAGGTGCACCTGGTGCAGTCTGGGGCTGAGGTGAAGAAGCCTGGGTCCTCGGTGAAGGTCTCCTGCAAGGCTTCTGGAGGCACCTTCAGCACCTCTGCTATCAGCTGGGTGCGACAGGCCCCTGGACAAGGGCTTGAGTGGATGGGAGGGATCATGCCTGTCATCGGAACAGCAAACTACGCACAGAACTTCCAGGGCAGAGTCACGATTACCGCGGACGAATCCACGACCACAGGCTACTTGGAACTGAGCAGCCTGAGATCTGAGGACACGGCCATTTATTACTGTGCGATTAGGGGCAGTGGCTGGACATACTCTTTTGACTACTGGGGCCAGGGAACC…	IGHV1-69*01	IGHD6-19*01	IGHJ4*02	AIRGSGWTYSFDY	13	4.49102	ATGGACATGAGGGTCCCTGCTCAGCTCCTGGGGCTCCTGCTGCTCTGGCTCTCAGGTGCCAGATGTGACATCCAGATGACCCAGTCGCCATCCTCCCTGTCTGCGTCTGTTGGAGACAGAGTCACCATCACTTGCCAGGCGAGTCAGCACATTGACGACCATTTAAACTGGTATCAGCAGAAACCAGGGAAAGCCCCTAAACTCCTCATCTACGATGTCTCCAATTTGGAAACAGGGGTCCCTTCAAGGTTCAGTGGACATAAATCTGGGACAGATTTTTCTCTCACCATCAGTAGCCTGCAGCCTGAAGATATTGCAACATATTTCTGTCAACAGTTTGATAATCTCCACGAGGTATTCACTTTCGGCCCTGGGACCAAAGTGGATATCAAACG	KV1-33	KJ3	QQFDNLHEVFT	11	7.1875
c1621	211774	NN	ATGGACTGGACCTGGAGGTTCCTCTTTGTGGTGGCAGCAGCTACAGGTGTCCAGTCCCAGGTGCAGCTGGTGCAGTCTGGGGCTGAGGTGAAGAAGCCTGGGTCCTCGGTGAAGGTCTCCTGCAAGGCTTCTGGAGGCACCTTCAGCACCTCTGCTATCAGCTGGGTGCGACAGGCCCCTGGACAAGGGCTTGAGTGGATGGGAGGGATCATGCCTGTCATCGGAACAGCAAACTACGCACAGAACTTCCAGGGCAGAGTCACGATTAGCGCGGACGAATCCACGACCACAGGCTACTTGGAACTGAGCAGCCTGAGATCTGAGGACACGGCCATTTATTACTGTGCGATTAGGGGCAGTGGCTGGACATACTCTTTTGACTACTGGGGCCAGGGAACC…	IGHV1-69*01	IGHD6-19*01	IGHJ4*02	AIRGSGWTYSFDY	13	4.49102	ATGGACATGAGGGTCCCTGCTCAGCTCCTGGGGCTCCTGCTGCTCTGGCTCTCAGGTGCCAGATGTGACATCCAGATGACCCAGTCGCCATCCTCCCTGTCTGCGTCTGTTGGAGACAGAGTCACCATCACTTGCCAGGCGAGTCAGCACATTGACGACCATTTAAACTGGTATCAGCAGAAACCAGGGAAAGCCCCTAAACTCCTCATCTACGATGTCTCCAATTTGGAAACAGGGGTCCCTTCAAGGTTCAGTGGACATAAATCTGGGACAGATTTTTCTCTCACCATCAGTAGCCTGCAGCCTGAAGATATTGCAACATATTTCTGTCAACAGTTTGATAATCTCCACGAGGTATTCACTTTCGGCCCTGGGACCAAAGTGGATATCAAACG	KV1-33	KJ3	QQFDNLHEVFT	11	7.1875
c1651	211774	NN	ATGGACTGGACCTGGAGGTTCCTCTTTGTGGTGGCAGCAGCTACAGGTGTCCAGTCCCAGGTGCAGCTGGTGCAGTCTGGGGCTGAGGTGAAGAAGCCTGGGTCCTCGGTGAAGGTCTCCTGCAAGGCTTCTGGAGGCACCTTCAGCACCTCTGCTATCAGCTGGGTGCGACAGGCCCCTGGACAAGGGCTTGAGTGGATGGGAGGGATCATGCCTGTCATCGGAACAGCAAACTACGCACAGAACTTCCAGGGCAGAGTCACGATTAGCGCGGACGAATCCACGACCACAGGCTACTTGGAACTGAGCAGCCTGAGATCTGAGGACACGGCCATTTATTACTGTGCGATTAGGGGCAGTGGCTGGACATACTCTTTTGACTACTGGGGCCAGGGAACC…	IGHV1-69*01	IGHD6-19*01	IGHJ4*02	AIRGSGWTYSFDY	13	4.49102	ATGGACATGAGGGTCCCTGCTCAGCTCCTGGGGCTCCTGCTGCTCTGGCTCTCAGGTGCCAGATGTGACATCCAGATGACCCAGTCGCCATCCTCCCTGTCTGCGTCTGTTGGAGACAGAGTCACCATCACTTGCCAGGCGAGTCAGCACATTGACGACCATTTAAACTGGTATCAGCAGAAACCAGGGAAAGCCCCTAAACTCCTCATCTACGATGTCTCCAATTTGGAAACAGGGGTCCCTTCAAGGTTCAGTGGACATAAATCTGGGACAGATTTTTCTCTCACCATCAGTAGCCTGCAGCCTGAAGATATTGCAACATATTTCTGTCAACAGTTTGATAATCTCCACGAGGTATTCACTTTCGGCCCTGGGACCAAAGTGGATATCAAACG	KV1-33	KJ3	QQFDNLHEVFT	11	7.1875
c2381	211774	NN	ATGGACTGGACCTGGAGGTTCCTCTTTGTGGTGGCAGCAGCTACAGGTGTCCAGTCCCAGGTGCACCTGGTGCAGTCTGGGGCTGAGGTGAAGAAGCCTGGGTCCTCGGTGAAGGTCTCCTGCAAGGCTTCTGGAGGCACCTTCAGCACCTCTGCTATCAGCTGGGTGCGACAGGCCCCTGGACAAGGGCTTGAGTGGATGGGAGGGATCATGCCTGTCATCGGAACAGCAAACTACGCACAGAACTTCCAGGGCAGAGTCACGATTACCGCGGACGAATCCACGACCACAGGCTACTTGGAACTGAGCAGCCTGAGATCTGAGGACACGGCCATTTATTACTGTGCGATTAGGGGCAGTGGCTGGACATACTCTTTTGACTACTGGGGCCAGGGAACC…	IGHV1-69*01	IGHD6-19*01	IGHJ4*02	AIRGSGWTYSFDY	13	4.49102	ATGGACATGAGGGTCCCTGCTCAGCTCCTGGGGCTCCTGCTGCTCTGGCTCTCAGGTGCCAGATGTGACATCCAGATGACCCAGTCGCCATCCTCCCTGTCTGCGTCTGTTGGAGACAGAGTCACCATCACTTGCCAGGCGAGTCAGCACATTGACGACCATTTAAACTGGTATCAGCAGAAACCAGGGAAAGCCCCTAAACTCCTCATCTACGATGTCTCCAATTTGGAAACAGGGGTCCCTTCAAGGTTCAGTGGACATAAATCTGGGACAGATTTTTCTCTCACCATCAGTAGCCTGCAGCCTGAAGATATTGCAACATATTTCTGTCAACAGTTTGATAATCTCCACGAGGTATTCACTTTCGGCCCTGGGACCAAAGTGGATATCAAACG	KV1-33	KJ3	QQFDNLHEVFT	11	7.1875
c1395	211774	NN	ATGGACTGGACCTGGAGGTTCCTCTTTGTGGTGGCAGCAGCTACAGGTGTCCAGTCCCAGGTGCAGCTGGTGCAGTCTGGGGCTGAGGTGAAGAAGCCTGGGTCCTCGGTGAAGGTCTCCTGCAAGGCTTCTGGAGGCACCTTCAGCACCTCTGCTATCAGCTGGGTGCGACAGGCCCCTGGACAAGGGCTTGAGTGGATGGGAGGGATCATGCCTGTCATCGGAACAGCAAACTACGCACAGAACTTCCAGGGCAGAGTCACGATTAGCGCGGACGAATCCACGACCACAGGCTACTTGGAACTGAGCAGCCTGAGATCTGAGGACACGGCCATTTATTACTGTGCGATTAGGGGCAGTGGCTGGACATACTCTTTTGACTACTGGGGCCAGGGAACC…	IGHV1-69*01	IGHD6-19*01	IGHJ4*02	AIRGSGWTYSFDY	13	4.49102	ATGGACATGAGGGTCCCTGCTCAGCTCCTGGGGCTCCTGCTGCTCTGGCTCTCAGGTGCCAGATGTGACATCCAGATGACCCAGTCGCCATCCTCCCTGTCTGCGTCTGTTGGAGACAGAGTCACCATCACTTGCCAGGCGAGTCAGCACATTGACGACCATTTAAACTGGTATCAGCAGAAACCAGGGAAAGCCCCTAAACTCCTCATCTACGATGTCTCCAATTTGGAAACAGGGGTCCCTTCAAGGTTCAGTGGACATAAATCTGGGACAGATTTTTCTCTCACCATCAGTAGCCTGCAGCCTGAAGATATTGCAACATATTTCTGTCAACAGTTTGATAATCTCCACGAGGTATTCACTTTCGGCCCTGGGACCAAAGTGGATATCAAACG	KV1-33	KJ3	QQFDNLHEVFT	11	7.1875
c1372	211774	NN	ATGGACTGGACCTGGAGGTTCCTCTTTGTGGTGGCAGCAGCTACAGGTGTCCAGTCCCAGGTGCAGCTGGTGCAGTCTGGGGCTGAGGTGAAGAAGCCTGGGTCCTCGGTGAAGGTCTCCTGCAAGGCTTCTGGAGGCACCTTCAGCACCTCTGCTATCAGCTGGGTGCGACAGGCCCCTGGACAAGGGCTTGAGTGGATGGGAGGGATCATGCCTGTCATCGGAACAGCAAACTACGCACAGAACTTCCAGGGCAGAGTCACGATTAGCGCGGACGAATCCACGACCACAGGCTACTTGGAACTGAGCAGCCTGAGATCTGAGGACACGGCCATTTATTACTGTGCGATTAGGGGCAGTGGCTGGACATACTCTTTTGACTACTGGGGCCAGGGAACC…	IGHV1-69*01	IGHD6-19*01	IGHJ4*02	AIRGSGWTYSFDY	13	4.49102	ATGGACATGAGGGTCCCTGCTCAGCTCCTGGGGCTCCTGCTGCTCTGGCTCTCAGGTGCCAGATGTGACATCCAGATGACCCAGTCGCCATCCTCCCTGTCTGCGTCTGTTGGAGACAGAGTCACCATCACTTGCCAGGCGAGTCAGCACATTGACGACCATTTAAACTGGTATCAGCAGAAACCAGGGAAAGCCCCTAAACTCCTCATCTACGATGTCTCCAATTTGGAAACAGGGGTCCCTTCAAGGTTCAGTGGACATAAATCTGGGACAGATTTTTCTCTCACCATCAGTAGCCTGCAGCCTGAAGATATTGCAACATATTTCTGTCAACAGTTTGATAATCTCCACGAGGTATTCACTTTCGGCCCTGGGACCAAAGTGGATATCAAACG	KV1-33	KJ3	QQFDNLHEVFT	11	7.1875
c1364	211774	NN	ATGGACTGGACCTGGAGGTTCCTCTTTGTGGTGGCAGCAGCTACAGGTGTCCAGTCCCAGGTGCAGCTGGTGCAGTCTGGGGCTGAGGTGAAGAAGCCTGGGTCCTCGGTGAAGGTCTCCTGCAAGGCTTCTGGAGGCACCTTCAGCACCTCTGCTATCAGCTGGGTGCGACAGGCCCCTGGACAAGGGCTTGAGTGGATGGGAGGGATCATGCCTGTCATCGGAACAGCAAACTACGCACAGAACTTCCAGGGCAGAGTCACGATTAGCGCGGACGAATCCACGACCACAGGCTACTTGGAACTGAGCAGCCTGAGATCTGAGGACACGGCCATTTATTACTGTGCGATTAGGGGCAGTGGCTGGACATACTCTTTTGACTACTGGGGCCAGGGAACC…	IGHV1-69*01	IGHD6-19*01	IGHJ4*02	AIRGSGWTYSFDY	13	4.49102	ATGGACATGAGGGTCCCTGCTCAGCTCCTGGGGCTCCTGCTGCTCTGGCTCTCAGGTGCCAGATGTGACATCCAGATGACCCAGTCGCCATCCTCCCTGTCTGCGTCTGTTGGAGACAGAGTCACCATCACTTGCCAGGCGAGTCAGCACATTGACGACCATTTAAACTGGTATCAGCAGAAACCAGGGAAAGCCCCTAAACTCCTCATCTACGATGTCTCCAATTTGGAAACAGGGGTCCCTTCAAGGTTCAGTGGACATAAATCTGGGACAGATTTTTCTCTCACCATCAGTAGCCTGCAGCCTGAAGATATTGCAACATATTTCTGTCAACAGTTTGATAATCTCCACGAGGTATTCACTTTCGGCCCTGGGACCAAAGTGGATATCAAACG	KV1-33	KJ3	QQFDNLHEVFT	11	7.1875
c1680	211774	NN	ATGGACTGGACCTGGAGGTTCCTCTTTGTGGTGGCAGCAGCTACAGGTGTCCAGTCCCAGGTGCAGCTGGTGCAGTCTGGGGCTGAGGTGAAGAAGCCTGGGTCCTCGGTGAAGGTCTCCTGCAAGGCTTCTGGAGGCACCTTCAGCACCTCTGCTATCAGCTGGGTGCGACAGGCCCCTGGACAAGGGCTTGAGTGGATGGGAGGGATCATGCCTGTCATCGGAACAGCAAACTACGCACAGAACTTCCAGGGCAGAGTCACGATTAGCGCGGACGAATCCACGACCACAGGCTACTTGGAACTGAGCAGCCTGAGATCTGAGGACACGGCCATTTATTACTGTGCGATTAGGGGCAGTGGCTGGACATACTCTTTTGACTACTGGGGCCAGGGAACC…	IGHV1-69*01	IGHD6-19*01	IGHJ4*02	AIRGSGWTYSFDY	13	4.49102	ATGGACATGAGGGTCCCTGCTCAGCTCCTGGGGCTCCTGCTGCTCTGGCTCTCAGGTGCCAGATGTGACATCCAGATGACCCAGTCGCCATCCTCCCTGTCTGCGTCTGTTGGAGACAGAGTCACCATCACTTGCCAGGCGAGTCAGCACATTGACGACCATTTAAACTGGTATCAGCAGAAACCAGGGAAAGCCCCTAAACTCCTCATCTACGATGTCTCCAATTTGGAAACAGGGGTCCCTTCAAGGTTCAGTGGACATAAATCTGGGACAGATTTTTCTCTCACCATCAGTAGCCTGCAGCCTGAAGATATTGCAACATATTTCTGTCAACAGTTTGATAATCTCCACGAGGTATTCACTTTCGGCCCTGGGACCAAAGTGGATATCAAACG	KV1-33	KJ3	QQFDNLHEVFT	11	7.1875
c1266	211774	NN	ATGGACTGGACCTGGAGGTTCCTCTTTGTGGTGGCAGCAGCTACAGGTGTCCAGTCCCAGGTGCAGCTGGTGCAGTCTGGGGCTGAGGTGAAGAAGCCTGGGTCCTCGGTGAAGGTCTCCTGCAAGGCTTCTGGAGGCACCTTCAGCACCTCTGCTATCAGCTGGGTGCGACAGGCCCCTGGACAAGGGCTTGAGTGGATGGGAGGGATCATGCCTGTCATCGGAACAGCAAACTACGCACAGAACTTCCAGGGCAGAGTCACGATTAGCGCGGACGAATCCACGACCACAGGCTACTTGGAACTGAGCAGCCTGAGATCTGAGGACACGGCCATTTATTACTGTGCGATTAGGGGCAGTGGCTGGACATACTCTTTTGACTACTGGGGCCAGGGAACC…	IGHV1-69*01	IGHD6-19*01	IGHJ4*02	AIRGSGWTYSFDY	13	4.49102	ATGGACATGAGGGTCCCTGCTCAGCTCCTGGGGCTCCTGCTGCTCTGGCTCTCAGGTGCCAGATGTGACATCCAGATGACCCAGTCGCCATCCTCCCTGTCTGCGTCTGTTGGAGACAGAGTCACCATCACTTGCCAGGCGAGTCAGCACATTGACGACCATTTAAACTGGTATCAGCAGAAACCAGGGAAAGCCCCTAAACTCCTCATCTACGATGTCTCCAATTTGGAAACAGGGGTCCCTTCAAGGTTCAGTGGACATAAATCTGGGACAGATTTTTCTCTCACCATCAGTAGCCTGCAGCCTGAAGATATTGCAACATATTTCTGTCAACAGTTTGATAATCTCCACGAGGTATTCACTTTCGGCCCTGGGACCAAAGTGGATATCAAACG	KV1-33	KJ3	QQFDNLHEVFT	11	7.1875
c1491	211774	NN	ATGGACTGGACCTGGAGGTTCCTCTTTGTGGTGGCAGCAGCTACAGGTGTCCAGTCCCAGGTGCAGCTGGTGCAGTCTGGGGCTGAGGTGAAGAAGCCTGGGTCCTCGGTGAAGGTCTCCTGCAAGGCTTCTGGAGGCACCTTCAGCACCTCTGCTATCAGCTGGGTGCGACAGGCCCCTGGACAAGGGCTTGAGTGGATGGGAGGGATCATGCCTGTCATCGGAACAGCAAACTACGCACAGAACTTCCAGGGCAGAGTCACGATTAGCGCGGACGAATCCACGACCACAGGCTACTTGGAACTGAGCAGCCTGAGATCTGAGGACACGGCCATTTATTACTGTGCGATTAGGGGCAGTGGCTGGACATACTCTTTTGACTACTGGGGCCAGGGAACC…	IGHV1-69*01	IGHD6-19*01	IGHJ4*02	AIRGSGWTYSFDY	13	4.49102	ATGGACATGAGGGTCCCTGCTCAGCTCCTGGGGCTCCTGCTGCTCTGGCTCTCAGGTGCCAGATGTGACATCCAGATGACCCAGTCGCCATCCTCCCTGTCTGCGTCTGTTGGAGACAGAGTCACCATCACTTGCCAGGCGAGTCAGCACATTGACGACCATTTAAACTGGTATCAGCAGAAACCAGGGAAAGCCCCTAAACTCCTCATCTACGATGTCTCCAATTTGGAAACAGGGGTCCCTTCAAGGTTCAGTGGACATAAATCTGGGACAGATTTTTCTCTCACCATCAGTAGCCTGCAGCCTGAAGATATTGCAACATATTTCTGTCAACAGTTTGATAATCTCCACGAGGTATTCACTTTCGGCCCTGGGACCAAAGTGGATATCAAACG	KV1-33	KJ3	QQFDNLHEVFT	11	7.1875
c2058	211774	NN	ATGGACTGGACCTGGAGGTTCCTCTTTGTGGTGGCAGCAGCTACAGGTGTCCAGTCCCAGGTGCAGCTGGTGCAGTCTGGGGCTGAGGTGAAGAAGCCTGGGTCCTCGGTGAAGGTCTCCTGCAAGGCTTCTGGAGGCACCTTCAGCACCTCTGCTATCAGCTGGGTGCGACAGGCCCCTGGACAAGGGCTTGAGTGGATGGGAGGGATCATGCCTGTCATCGGAACAGCAAACTACGCACAGAACTTCCAGGGCAGAGTCACGATTAGCGCGGACGAATCCACGACCACAGGCTACTTGGAACTGAGCAGCCTGAGATCTGAGGACACGGCCATTTATTACTGTGCGATTAGGGGCAGTGGCTGGACATACTCTTTTGACTACTGGGGCCAGGGAACC…	IGHV1-69*01	IGHD6-19*01	IGHJ4*02	AIRGSGWTYSFDY	13	4.49102	ATGGACATGAGGGTCCCTGCTCAGCTCCTGGGGCTCCTGCTGCTCTGGCTCTCAGGTGCCAGATGTGACATCCAGATGACCCAGTCGCCATCCTCCCTGTCTGCGTCTGTTGGAGACAGAGTCACCATCACTTGCCAGGCGAGTCAGCACATTGACGACCATTTAAACTGGTATCAGCAGAAACCAGGGAAAGCCCCTAAACTCCTCATCTACGATGTCTCCAATTTGGAAACAGGGGTCCCTTCAAGGTTCAGTGGACATAAATCTGGGACAGATTTTTCTCTCACCATCAGTAGCCTGCAGCCTGAAGATATTGCAACATATTTCTGTCAACAGTTTGATAATCTCCACGAGGTATTCACTTTCGGCCCTGGGACCAAAGTGGATATCAAACG	KV1-33	KJ3	QQFDNLHEVFT	11	7.1875
c1381	211774	NN	ATGGACTGGACCTGGAGGTTCCTCTTTGTGGTGGCAGCAGCTACAGGTGTCCAGTCCCAGGTGCAGCTGGTGCAGTCTGGGGCTGAGGTGAAGAAGCCTGGGTCCTCGGTGAAGGTCTCCTGCAAGGCTTCTGGAGGCACCTTCAGCACCTCTGCTATCAGCTGGGTGCGACAGGCCCCTGGACAAGGGCTTGAGTGGATGGGAGGGATCATGCCTGTCATCGGAACAGCAAACTACGCACAGAACTTCCAGGGCAGAGTCACGATTAGCGCGGACGAATCCACGACCACAGGCTACTTGGAACTGAGCAGCCTGAGATCTGAGGACACGGCCATTTATTACTGTGCGATTAGGGGCAGTGGCTGGACATACTCTTTTGACTACTGGGGCCAGGGAACC…	IGHV1-69*01	IGHD6-19*01	IGHJ4*02	AIRGSGWTYSFDY	13	4.49102	ATGGACATGAGGGTCCCTGCTCAGCTCCTGGGGCTCCTGCTGCTCTGGCTCTCAGGTGCCAGATGTGACATCCAGATGACCCAGTCGCCATCCTCCCTGTCTGCGTCTGTTGGAGACAGAGTCACCATCACTTGCCAGGCGAGTCAGCACATTGACGACCATTTAAACTGGTATCAGCAGAAACCAGGGAAAGCCCCTAAACTCCTCATCTACGATGTCTCCAATTTGGAAACAGGGGTCCCTTCAAGGTTCAGTGGACATAAATCTGGGACAGATTTTTCTCTCACCATCAGTAGCCTGCAGCCTGAAGATATTGCAACATATTTCTGTCAACAGTTTGATAATCTCCACGAGGTATTCACTTTCGGCCCTGGGACCAAAGTGGATATCAAACG	KV1-33	KJ3	QQFDNLHEVFT	11	7.1875
c1746	211774	NN	ATGGACTGGACCTGGAGGTTCCTCTTTGTGGTGGCAGCAGCTACAGGTGTCCAGTCCCAGGTGCAGCTGGTGCAGTCTGGGGCTGAGGTGAAGAAGCCTGGGTCCTCGGTGAAGGTCTCCTGCAAGGCTTCTGGAGGCACCTTCAGCACCTCTGCTATCAGCTGGGTGCGACAGGCCCCTGGACAAGGGCTTGAGTGGATGGGAGGGATCATGCCTGTCATCGGAACAGCAAACTACGCACAGAACTTCCAGGGCAGAGTCACGATTAGCGCGGACGAATCCACGACCACAGGCTACTTGGAACTGAGCAGCCTGAGATCTGAGGACACGGCCATTTATTACTGTGCGATTAGGGGCAGTGGCTGGACATACTCTTTTGACTACTGGGGCCAGGGAACC…	IGHV1-69*01	IGHD6-19*01	IGHJ4*02	AIRGSGWTYSFDY	13	4.49102	ATGGACATGAGGGTCCCTGCTCAGCTCCTGGGGCTCCTGCTGCTCTGGCTCTCAGGTGCCAGATGTGACATCCAGATGACCCAGTCGCCATCCTCCCTGTCTGCGTCTGTTGGAGACAGAGTCACCATCACTTGCCAGGCGAGTCAGCACATTGACGACCATTTAAACTGGTATCAGCAGAAACCAGGGAAAGCCCCTAAACTCCTCATCTACGATGTCTCCAATTTGGAAACAGGGGTCCCTTCAAGGTTCAGTGGACATAAATCTGGGACAGATTTTTCTCTCACCATCAGTAGCCTGCAGCCTGAAGATATTGCAACATATTTCTGTCAACAGTTTGATAATCTCCACGAGGTATTCACTTTCGGCCCTGGGACCAAAGTGGATATCAAACG	KV1-33	KJ3	QQFDNLHEVFT	11	7.1875
c1736	211774	NN	ATGGACTGGACCTGGAGGTTCCTCTTTGTGGTGGCAGCAGCTACAGGTGTCCAGTCCCAGGTGCAGCTGGTGCAGTCTGGGGCTGAGGTGAAGAAGCCTGGGTCCTCGGTGAAGGTCTCCTGCAAGGCTTCTGGAGGCACCTTCAGCACCTCTGCTATCAGCTGGGTGCGACAGGCCCCTGGACAAGGGCTTGAGTGGATGGGAGGGATCATGCCTGTCATCGGAACAGCAAACTACGCACAGAACTTCCAGGGCAGAGTCACGATTAGCGCGGACGAATCCACGACCACAGGCTACTTGGAACTGAGCAGCCTGAGATCTGAGGACACGGCCATTTATTACTGTGCGATTAGGGGCAGTGGCTGGACATACTCTTTTGACTACTGGGGCCAGGGAACC…	IGHV1-69*01	IGHD6-19*01	IGHJ4*02	AIRGSGWTYSFDY	13	4.49102	ATGGACATGAGGGTCCCTGCTCAGCTCCTGGGGCTCCTGCTGCTCTGGCTCTCAGGTGCCAGATGTGACATCCAGATGACCCAGTCGCCATCCTCCCTGTCTGCGTCTGTTGGAGACAGAGTCACCATCACTTGCCAGGCGAGTCAGCACATTGACGACCATTTAAACTGGTATCAGCAGAAACCAGGGAAAGCCCCTAAACTCCTCATCTACGATGTCTCCAATTTGGAAACAGGGGTCCCTTCAAGGTTCAGTGGACATAAATCTGGGACAGATTTTTCTCTCACCATCAGTAGCCTGCAGCCTGAAGATATTGCAACATATTTCTGTCAACAGTTTGATAATCTCCACGAGGTATTCACTTTCGGCCCTGGGACCAAAGTGGATATCAAACG	KV1-33	KJ3	QQFDNLHEVFT	11	7.1875
c2302	211774	NN	ATGGACTGGACCTGGAGGTTCCTCTTTGTGGTGGCAGCAGCTACAGGTGTCCAGTCCCAGGTGCAGCTGGTGCAGTCTGGGGCTGAGGTGAAGAAGCCTGGGTCCTCGGTGAAGGTCTCCTGCAAGGCTTCTGGAGGCACCTTCAGCACCTCTGCTATCAGCTGGGTGCGACAGGCCCCTGGACAAGGGCTTGAGTGGATGGGAGGGATCATGCCTGTCATCGGAACAGCAAACTACGCACAGAACTTCCAGGGCAGAGTCACGATTAGCGCGGACGAATCCACGACCACAGGCTACTTGGAACTGAGCAGCCTGAGATCTGAGGACACGGCCATTTATTACTGTGCGATTAGGGGCAGTGGCTGGACATACTCTTTTGACTACTGGGGCCAGGGAACC…	IGHV1-69*01	IGHD6-19*01	IGHJ4*02	AIRGSGWTYSFDY	13	4.49102	ATGGACATGAGGGTCCCTGCTCAGCTCCTGGGGCTCCTGCTGCTCTGGCTCTCAGGTGCCAGATGTGACATCCAGATGACCCAGTCGCCATCCTCCCTGTCTGCGTCTGTTGGAGACAGAGTCACCATCACTTGCCAGGCGAGTCAGCACATTGACGACCATTTAAACTGGTATCAGCAGAAACCAGGGAAAGCCCCTAAACTCCTCATCTACGATGTCTCCAATTTGGAAACAGGGGTCCCTTCAAGGTTCAGTGGACATAAATCTGGGACAGATTTTTCTCTCACCATCAGTAGCCTGCAGCCTGAAGATATTGCAACATATTTCTGTCAACAGTTTGATAATCTCCACGAGGTATTCACTTTCGGCCCTGGGACCAAAGTGGATATCAAACG	KV1-33	KJ3	QQFDNLHEVFT	11	7.1875
c2100	211774	NN	ATGGACTGGACCTGGAGGTTCCTCTTTGTGGTGGCAGCAGCTACAGGTGTCCAGTCCCAGGTGCAGCTGGTGCAGTCTGGGGCTGAGGTGAAGAAGCCTGGGTCCTCGGTGAAGGTCTCCTGCAAGGCTTCTGGAGGCACCTTCAGCACCTCTGCTATCAGCTGGGTGCGACAGGCCCCTGGACAAGGGCTTGAGTGGATGGGAGGGATCATGCCTGTCATCGGAACAGCAAACTACGCACAGAACTTCCAGGGCAGAGTCACGATTAGCGCGGACGAATCCACGACCACAGGCTACTTGGAACTGAGCAGCCTGAGATCTGAGGACACGGCCATTTATTACTGTGCGATTAGGGGCAGTGGCTGGACATACTCTTTTGACTACTGGGGCCAGGGAACC…	IGHV1-69*01	IGHD6-19*01	IGHJ4*02	AIRGSGWTYSFDY	13	4.49102	ATGGACATGAGGGTCCCTGCTCAGCTCCTGGGGCTCCTGCTGCTCTGGCTCTCAGGTGCCAGATGTGACATCCAGATGACCCAGTCGCCATCCTCCCTGTCTGCGTCTGTTGGAGACAGAGTCACCATCACTTGCCAGGCGAGTCAGCACATTGACGACCATTTAAACTGGTATCAGCAGAAACCAGGGAAAGCCCCTAAACTCCTCATCTACGATGTCTCCAATTTGGAAACAGGGGTCCCTTCAAGGTTCAGTGGACATAAATCTGGGACAGATTTTTCTCTCACCATCAGTAGCCTGCAGCCTGAAGATATTGCAACATATTTCTGTCAACAGTTTGATAATCTCCACGAGGTATTCACTTTCGGCCCTGGGACCAAAGTGGATATCAAACG	KV1-33	KJ3	QQFDNLHEVFT	11	7.1875
c2378	211774	NN	ATGGACTGGACCTGGAGGTTCCTCTTTGTGGTGGCAGCAGCTACAGGTGTCCAGTCCCAGGTGCACCTGGTGCAGTCTGGGGCTGAGGTGAAGAAGCCTGGGTCCTCGGTGAAGGTCTCCTGCAAGGCTTCTGGAGGCACCTTCAGCACCTCTGCTATCAGCTGGGTGCGACAGGCCCCTGGACAAGGGCTTGAGTGGATGGGAGGGATCATGCCTGTCATCGGAACAGCAAACTACGCACAGAACTTCCAGGGCAGAGTCACGATTACCGCGGACGAATCCACGACCACAGGCTACTTGGAACTGAGCAGCCTGAGATCTGAGGACACGGCCATTTATTACTGTGCGATTAGGGGCAGTGGCTGGACATACTCTTTTGACTACTGGGGCCAGGGAACC…	IGHV1-69*01	IGHD6-19*01	IGHJ4*02	AIRGSGWTYSFDY	13	4.49102	ATGGACATGAGGGTCCCTGCTCAGCTCCTGGGGCTCCTGCTGCTCTGGCTCTCAGGTGCCAGATGTGACATCCAGATGACCCAGTCGCCATCCTCCCTGTCTGCGTCTGTTGGAGACAGAGTCACCATCACTTGCCAGGCGAGTCAGCACATTGACGACCATTTAAACTGGTATCAGCAGAAACCAGGGAAAGCCCCTAAACTCCTCATCTACGATGTCTCCAATTTGGAAACAGGGGTCCCTTCAAGGTTCAGTGGACATAAATCTGGGACAGATTTTTCTCTCACCATCAGTAGCCTGCAGCCTGAAGATATTGCAACATATTTCTGTCAACAGTTTGATAATCTCCACGAGGTATTCACTTTCGGCCCTGGGACCAAAGTGGATATCAAACG	KV1-33	KJ3	QQFDNLHEVFT	11	7.1875
c2077	211774	NN	ATGGACTGGACCTGGAGGTTCCTCTTTGTGGTGGCAGCAGCTACAGGTGTCCAGTCCCAGGTGCACCTGGTGCAGTCTGGGGCTGAGGTGAAGAAGCCTGGGTCCTCGGTGAAGGTCTCCTGCAAGGCTTCTGGAGGCACCTTCAGCACCTCTGCTATCAGCTGGGTGCGACAGGCCCCTGGACAAGGGCTTGAGTGGATGGGAGGGATCATGCCTGTCATCGGAACAGCAAACTACGCACAGAACTTCCAGGGCAGAGTCACGATTACCGCGGACGAATCCACGACCACAGGCTACTTGGAACTGAGCAGCCTGAGATCTGAGGACACGGCCATTTATTACTGTGCGATTAGGGGCAGTGGCTGGACATACTCTTTTGACTACTGGGGCCAGGGAACC…	IGHV1-69*01	IGHD6-19*01	IGHJ4*02	AIRGSGWTYSFDY	13	4.49102	ATGGACATGAGGGTCCCTGCTCAGCTCCTGGGGCTCCTGCTGCTCTGGCTCTCAGGTGCCAGATGTGACATCCAGATGACCCAGTCGCCATCCTCCCTGTCTGCGTCTGTTGGAGACAGAGTCACCATCACTTGCCAGGCGAGTCAGCACATTGACGACCATTTAAACTGGTATCAGCAGAAACCAGGGAAAGCCCCTAAACTCCTCATCTACGATGTCTCCAATTTGGAAACAGGGGTCCCTTCAAGGTTCAGTGGACATAAATCTGGGACAGATTTTTCTCTCACCATCAGTAGCCTGCAGCCTGAAGATATTGCAACATATTTCTGTCAACAGTTTGATAATCTCCACGAGGTATTCACTTTCGGCCCTGGGACCAAAGTGGATATCAAACG	KV1-33	KJ3	QQFDNLHEVFT	11	7.1875
c2286	211774	NN	ATGGACTGGACCTGGAGGTTCCTCTTTGTGGTGGCAGCAGCTACAGGTGTCCAGTCCCAGGTGCAGCTGGTGCAGTCTGGGGCTGAGGTGAAGAAGCCTGGGTCCTCGGTGAAGGTCTCCTGCAAGGCTTCTGGAGGCACCTTCAGCACCTCTGCTATCAGCTGGGTGCGACAGGCCCCTGGACAAGGGCTTGAGTGGATGGGAGGGATCATGCCTGTCATCGGAACAGCAAACTACGCACAGAACTTCCAGGGCAGAGTCACGATTAGCGCGGACGAATCCACGACCACAGGCTACTTGGAACTGAGCAGCCTGAGATCTGAGGACACGGCCATTTATTACTGTGCGATTAGGGGCAGTGGCTGGACATACTCTTTTGACTACTGGGGCCAGGGAACC…	IGHV1-69*01	IGHD6-19*01	IGHJ4*02	AIRGSGWTYSFDY	13	4.49102	ATGGACATGAGGGTCCCTGCTCAGCTCCTGGGGCTCCTGCTGCTCTGGCTCTCAGGTGCCAGATGTGACATCCAGATGACCCAGTCGCCATCCTCCCTGTCTGCGTCTGTTGGAGACAGAGTCACCATCACTTGCCAGGCGAGTCAGCACATTGACGACCATTTAAACTGGTATCAGCAGAAACCAGGGAAAGCCCCTAAACTCCTCATCTACGATGTCTCCAATTTGGAAACAGGGGTCCCTTCAAGGTTCAGTGGACATAAATCTGGGACAGATTTTTCTCTCACCATCAGTAGCCTGCAGCCTGAAGATATTGCAACATATTTCTGTCAACAGTTTGATAATCTCCACGAGGTATTCACTTTCGGCCCTGGGACCAAAGTGGATATCAAACG	KV1-33	KJ3	QQFDNLHEVFT	11	7.1875
c1322	211774	NN	ATGGACTGGACCTGGAGGTTCCTCTTTGTGGTGGCAGCAGCTACAGGTGTCCAGTCCCAGGTGCAGCTGGTGCAGTCTGGGGCTGAGGTGAAGAAGCCTGGGTCCTCGGTGAAGGTCTCCTGCAAGGCTTCTGGAGGCACCTTCAGCACCTCTGCTATCAGCTGGGTGCGACAGGCCCCTGGACAAGGGCTTGAGTGGATGGGAGGGATCATGCCTGTCATCGGAACAGCAAACTACGCACAGAACTTCCAGGGCAGAGTCACGATTAGCGCGGACGAATCCACGACCACAGGCTACTTGGAACTGAGCAGCCTGAGATCTGAGGACACGGCCATTTATTACTGTGCGATTAGGGGCAGTGGCTGGACATACTCTTTTGACTACTGGGGCCAGGGAACC…	IGHV1-69*01	IGHD6-19*01	IGHJ4*02	AIRGSGWTYSFDY	13	4.49102	ATGGACATGAGGGTCCCTGCTCAGCTCCTGGGGCTCCTGCTGCTCTGGCTCTCAGGTGCCAGATGTGACATCCAGATGACCCAGTCGCCATCCTCCCTGTCTGCGTCTGTTGGAGACAGAGTCACCATCACTTGCCAGGCGAGTCAGCACATTGACGACCATTTAAACTGGTATCAGCAGAAACCAGGGAAAGCCCCTAAACTCCTCATCTACGATGTCTCCAATTTGGAAACAGGGGTCCCTTCAAGGTTCAGTGGACATAAATCTGGGACAGATTTTTCTCTCACCATCAGTAGCCTGCAGCCTGAAGATATTGCAACATATTTCTGTCAACAGTTTGATAATCTCCACGAGGTATTCACTTTCGGCCCTGGGACCAAAGTGGATATCAAACG	KV1-33	KJ3	QQFDNLHEVFT	11	7.1875
c2177	211774	NN	ATGGACTGGACCTGGAGGTTCCTCTTTGTGGTGGCAGCAGCTACAGGTGTCCAGTCCCAGGTGCAGCTGGTGCAGTCTGGGGCTGAGGTGAAGAAGCCTGGGTCCTCGGTGAAGGTCTCCTGCAAGGCTTCTGGAGGCACCTTCAGCACCTCTGCTATCAGCTGGGTGCGACAGGCCCCTGGACAAGGGCTTGAGTGGATGGGAGGGATCATGCCTGTCATCGGAACAGCAAACTACGCACAGAACTTCCAGGGCAGAGTCACGATTAGCGCGGACGAATCCACGACCACAGGCTACTTGGAACTGAGCAGCCTGAGATCTGAGGACACGGCCATTTATTACTGTGCGATTAGGGGCAGTGGCTGGACATACTCTTTTGACTACTGGGGCCAGGGAACC…	IGHV1-69*01	IGHD6-19*01	IGHJ4*02	AIRGSGWTYSFDY	13	4.49102	ATGGACATGAGGGTCCCTGCTCAGCTCCTGGGGCTCCTGCTGCTCTGGCTCTCAGGTGCCAGATGTGACATCCAGATGACCCAGTCGCCATCCTCCCTGTCTGCGTCTGTTGGAGACAGAGTCACCATCACTTGCCAGGCGAGTCAGCACATTGACGACCATTTAAACTGGTATCAGCAGAAACCAGGGAAAGCCCCTAAACTCCTCATCTACGATGTCTCCAATTTGGAAACAGGGGTCCCTTCAAGGTTCAGTGGACATAAATCTGGGACAGATTTTTCTCTCACCATCAGTAGCCTGCAGCCTGAAGATATTGCAACATATTTCTGTCAACAGTTTGATAATCTCCACGAGGTATTCACTTTCGGCCCTGGGACCAAAGTGGATATCAAACG	KV1-33	KJ3	QQFDNLHEVFT	11	7.1875
c2193	211774	NN	ATGGACTGGACCTGGAGGTTCCTCTTTGTGGTGGCAGCAGCTACAGGTGTCCAGTCCCAGGTGCACCTGGTGCAGTCTGGGGCTGAGGTGAAGAAGCCTGGGTCCTCGGTGAAGGTCTCCTGCAAGGCTTCTGGAGGCACCTTCAGCACCTCTGCTATCAGCTGGGTGCGACAGGCCCCTGGACAAGGGCTTGAGTGGATGGGAGGGATCATGCCTGTCATCGGAACAGCAAACTACGCACAGAACTTCCAGGGCAGAGTCACGATTACCGCGGACGAATCCACGACCACAGGCTACTTGGAACTGAGCAGCCTGAGATCTGAGGACACGGCCATTTATTACTGTGCGATTAGGGGCAGTGGCTGGACATACTCTTTTGACTACTGGGGCCAGGGAACC…	IGHV1-69*01	IGHD6-19*01	IGHJ4*02	AIRGSGWTYSFDY	13	4.49102	ATGGACATGAGGGTCCCTGCTCAGCTCCTGGGGCTCCTGCTGCTCTGGCTCTCAGGTGCCAGATGTGACATCCAGATGACCCAGTCGCCATCCTCCCTGTCTGCGTCTGTTGGAGACAGAGTCACCATCACTTGCCAGGCGAGTCAGCACATTGACGACCATTTAAACTGGTATCAGCAGAAACCAGGGAAAGCCCCTAAACTCCTCATCTACGATGTCTCCAATTTGGAAACAGGGGTCCCTTCAAGGTTCAGTGGACATAAATCTGGGACAGATTTTTCTCTCACCATCAGTAGCCTGCAGCCTGAAGATATTGCAACATATTTCTGTCAACAGTTTGATAATCTCCACGAGGTATTCACTTTCGGCCCTGGGACCAAAGTGGATATCAAACG	KV1-33	KJ3	QQFDNLHEVFT	11	7.1875
c1840	211774	NN	ATGGACTGGACCTGGAGGTTCCTCTTTGTGGTGGCAGCAGCTACAGGTGTCCAGTCCCAGGTGCAGCTGGTGCAGTCTGGGGCTGAGGTGAAGAAGCCTGGGTCCTCGGTGAAGGTCTCCTGCAAGGCTTCTGGAGGCACCTTCAGCACCTCTGCTATCAGCTGGGTGCGACAGGCCCCTGGACAAGGGCTTGAGTGGATGGGAGGGATCATGCCTGTCATCGGAACAGCAAACTACGCACAGAACTTCCAGGGCAGAGTCACGATTAGCGCGGACGAATCCACGACCACAGGCTACTTGGAACTGAGCAGCCTGAGATCTGAGGACACGGCCATTTATTACTGTGCGATTAGGGGCAGTGGCTGGACATACTTTTTTGACTACTGGGGCCAGGGAACC…	IGHV1-69*01	IGHD6-19*01	IGHJ4*02	AIRGSGWTYFFDY	13	4.49102	ATGGACATGAGGGTCCCTGCTCAGCTCCTGGGGCTCCTGCTGCTCTGGCTCTCAGGTGCCAGATGTGACATCCAGATGACCCAGTCGCCATCCTCCCTGTCTGCGTCTGTTGGAGACAGAGTCACCATCACTTGCCAGGCGAGTCAGCACATTGACGACCATTTAAACTGGTATCAGCAGAAACCAGGGAAAGCCCCTAAACTCCTCATCTACGATGTCTCCAATTTGGAAACAGGGGTCCCTTCAAGGTTCAGTGGACATAAATCTGGGACAGATTTTTCTCTCACCATCAGTAGCCTGCAGCCTGAAGATATTGCAACATATTTCTGTCAACAGTTTGATAATCTCCACGAGGTATTCACTTTCGGCCCTGGGACCAAAGTGGATATCAAACG	KV1-33	KJ3	QQFDNLHEVFT	11	7.1875
c1296	211774	NN	ATGGACTGGACCTGGAGGTTCCTCTTTGTGGTGGCAGCAGCTACAGGTGTCCAGTCCCAGGTGCAGCTGGTGCAGTCTGGGGCTGAGGTGAAGAAGCCTGGGTCCTCGGTGAAGGTCTCCTGCAAGGCTTCTGGAGGCACCTTCAGCACCTCTGCTATCAGCTGGGTGCGACAGGCCCCTGGACAAGGGCTTGAGTGGATGGGAGGGATCATGCCTGTCATCGGAACAGCAAACTACGCACAGAACTTCCAGGGCAGAGTCACGATTAGCGCGGACGAATCCACGACCACAGGCTACTTGGAACTGAGCAGCCTGAGATCTGAGGACACGGCCATTTATTACTGTGCGATTAGGGGCAGTGGCTGGACATACTCTTTTGACTACTGGGGCCAGGGAACC…	IGHV1-69*01	IGHD6-19*01	IGHJ4*02	AIRGSGWTYSFDY	13	4.49102	ATGGACATGAGGGTCCCTGCTCAGCTCCTGGGGCTCCTGCTGCTCTGGCTCTCAGGTGCCAGATGTGACATCCAGATGACCCAGTCGCCATCCTCCCTGTCTGCGTCTGTTGGAGACAGAGTCACCATCACTTGCCAGGCGAGTCAGCACATTGACGACCATTTAAACTGGTATCAGCAGAAACCAGGGAAAGCCCCTAAACTCCTCATCTACGATGTCTCCAATTTGGAAACAGGGGTCCCTTCAAGGTTCAGTGGACATAAATCTGGGACAGATTTTTCTCTCACCATCAGTAGCCTGCAGCCTGAAGATATTGCAACATATTTCTGTCAACAGTTTGATAATCTCCACGAGGTATTCACTTTCGGCCCTGGGACCAAAGTGGATATCAAACG	KV1-33	KJ3	QQFDNLHEVFT	11	7.1875
c1473	211774	NN	ATGGACTGGACCTGGAGGTTCCTCTTTGTGGTGGCAGCAGCTACAGGTGTCCAGTCCCAGGTGCAGCTGGTGCAGTCTGGGGCTGAGGTGAAGAAGCCTGGGTCCTCGGTGAAGGTCTCCTGCAAGGCTTCTGGAGGCACCTTCAGCACCTCTGCTATCAGCTGGGTGCGACAGGCCCCTGGACAAGGGCTTGAGTGGATGGGAGGGATCATGCCTGTCATCGGAACAGCAAACTACGCACAGAACTTCCAGGGCAGAGTCACGATTAGCGCGGACGAATCCACGACCACAGGCTACTTGGAACTGAGCAGCCTGAGATCTGAGGACACGGCCATTTATTACTGTGCGATTAGGGGCAGTGGCTGGACATACTCTTTTGACTACTGGGGCCAGGGAACC…	IGHV1-69*01	IGHD6-19*01	IGHJ4*02	AIRGSGWTYSFDY	13	4.49102	ATGGACATGAGGGTCCCTGCTCAGCTCCTGGGGCTCCTGCTGCTCTGGCTCTCAGGTGCCAGATGTGACATCCAGATGACCCAGTCGCCATCCTCCCTGTCTGCGTCTGTTGGAGACAGAGTCACCATCACTTGCCAGGCGAGTCAGCACATTGACGACCATTTAAACTGGTATCAGCAGAAACCAGGGAAAGCCCCTAAACTCCTCATCTACGATGTCTCCAATTTGGAAACAGGGGTCCCTTCAAGGTTCAGTGGACATAAATCTGGGACAGATTTTTCTCTCACCATCAGTAGCCTGCAGCCTGAAGATATTGCAACATATTTCTGTCAACAGTTTGATAATCTCCACGAGGTATTCACTTTCGGCCCTGGGACCAAAGTGGATATCAAACG	KV1-33	KJ3	QQFDNLHEVFT	11	7.1875
c1631	211774	NN	ATGGACTGGACCTGGAGGTTCCTCTTTGTGGTGGCAGCAGCTACAGGTGTCCAGTCCCAGGTGCAGCTGGTGCAGTCTGGGGCTGAGGTGAAGAAGCCTGGGTCCTCGGTGAAGGTCTCCTGCAAGGCTTCTGGAGGCACCTTCAGCACCTCTGCTATCAGCTGGGTGCGACAGGCCCCTGGACAAGGGCTTGAGTGGATGGGAGGGATCATGCCTGTCATCGGAACAGCAAACTACGCACAGAACTTCCAGGGCAGAGTCACGATTAGCGCGGACGAATCCACGACCACAGGCTACTTGGAACTGAGCAGCCTGAGATCTGAGGACACGGCCATTTATTACTGTGCGATTAGGGGCAGTGGCTGGACATACTCTTTTGACTACTGGGGCCAGGGAACC…	IGHV1-69*01	IGHD6-19*01	IGHJ4*02	AIRGSGWTYSFDY	13	4.49102	ATGGACATGAGGGTCCCTGCTCAGCTCCTGGGGCTCCTGCTGCTCTGGCTCTCAGGTGCCAGATGTGACATCCAGATGACCCAGTCGCCATCCTCCCTGTCTGCGTCTGTTGGAGACAGAGTCACCATCACTTGCCAGGCGAGTCAGCACATTGACGACCATTTAAACTGGTATCAGCAGAAACCAGGGAAAGCCCCTAAACTCCTCATCTACGATGTCTCCAATTTGGAAACAGGGGTCCCTTCAAGGTTCAGTGGACATAAATCTGGGACAGATTTTTCTCTCACCATCAGTAGCCTGCAGCCTGAAGATATTGCAACATATTTCTGTCAACAGTTTGATAATCTCCACGAGGTATTCACTTTCGGCCCTGGGACCAAAGTGGATATCAAACG	KV1-33	KJ3	QQFDNLHEVFT	11	7.1875
c1481	211774	NN	ATGGACTGGACCTGGAGGTTCCTCTTTGTGGTGGCAGCAGCTACAGGTGTCCAGTCCCAGGTGCAGCTGGTGCAGTCTGGGGCTGAGGTGAAGAAGCCTGGGTCCTCGGTGAAGGTCTCCTGCAAGGCTTCTGGAGGCACCTTCAGCACCTCTGCTATCAGCTGGGTGCGACAGGCCCCTGGACAAGGGCTTGAGTGGATGGGAGGGATCATGCCTGTCATCGGAACAGCAAACTACGCACAGAACTTCCAGGGCAGAGTCACGATTAGCGCGGACGAATCCACGACCACAGGCTACTTGGAACTGAGCAGCCTGAGATCTGAGGACACGGCCATTTATTACTGTGCGATTAGGGGCAGTGGCTGGACATACTCTTTTGACTACTGGGGCCAGGGAACC…	IGHV1-69*01	IGHD6-19*01	IGHJ4*02	AIRGSGWTYSFDY	13	4.49102	ATGGACATGAGGGTCCCTGCTCAGCTCCTGGGGCTCCTGCTGCTCTGGCTCTCAGGTGCCAGATGTGACATCCAGATGACCCAGTCGCCATCCTCCCTGTCTGCGTCTGTTGGAGACAGAGTCACCATCACTTGCCAGGCGAGTCAGCACATTGACGACCATTTAAACTGGTATCAGCAGAAACCAGGGAAAGCCCCTAAACTCCTCATCTACGATGTCTCCAATTTGGAAACAGGGGTCCCTTCAAGGTTCAGTGGACATAAATCTGGGACAGATTTTTCTCTCACCATCAGTAGCCTGCAGCCTGAAGATATTGCAACATATTTCTGTCAACAGTTTGATAATCTCCACGAGGTATTCACTTTCGGCCCTGGGACCAAAGTGGATATCAAACG	KV1-33	KJ3	QQFDNLHEVFT	11	7.1875
c1437	211774	NN	ATGGACTGGACCTGGAGGTTCCTCTTTGTGGTGGCAGCAGCTACAGGTGTCCAGTCCCAGGTGCAGCTGGTGCAGTCTGGGGCTGAGGTGAAGAAGCCTGGGTCCTCGGTGAAGGTCTCCTGCAAGGCTTCTGGAGGCACCTTCAGCACCTCTGCTATCAGCTGGGTGCGACAGGCCCCTGGACAAGGGCTTGAGTGGATGGGAGGGATCATGCCTGTCATCGGAACAGCAAACTACGCACAGAACTTCCAGGGCAGAGTCACGATTAGCGCGGACGAATCCACGACCACAGGCTACTTGGAACTGAGCAGCCTGAGATCTGAGGACACGGCCATTTATTACTGTGCGATTAGGGGCAGTGGCTGGACATACTCTTTTGACTACTGGGGCCAGGGAACC…	IGHV1-69*01	IGHD6-19*01	IGHJ4*02	AIRGSGWTYSFDY	13	4.49102	ATGGACATGAGGGTCCCTGCTCAGCTCCTGGGGCTCCTGCTGCTCTGGCTCTCAGGTGCCAGATGTGACATCCAGATGACCCAGTCGCCATCCTCCCTGTCTGCGTCTGTTGGAGACAGAGTCACCATCACTTGCCAGGCGAGTCAGCACATTGACGACCATTTAAACTGGTATCAGCAGAAACCAGGGAAAGCCCCTAAACTCCTCATCTACGATGTCTCCAATTTGGAAACAGGGGTCCCTTCAAGGTTCAGTGGACATAAATCTGGGACAGATTTTTCTCTCACCATCAGTAGCCTGCAGCCTGAAGATATTGCAACATATTTCTGTCAACAGTTTGATAATCTCCACGAGGTATTCACTTTCGGCCCTGGGACCAAAGTGGATATCAAACG	KV1-33	KJ3	QQFDNLHEVFT	11	7.1875
c2222	211774	NN	ATGGACTGGACCTGGAGGTTCCTCTTTGTGGTGGCAGCAGCTACAGGTGTCCAGTCCCAGGTGCAGCTGGTGCAGTCTGGGGCTGAGGTGAAGAAGCCTGGGTCCTCGGTGAAGGTCTCCTGCAAGGCTTCTGGAGGCACCTTCAGCACCTCTGCTATCAGCTGGGTGCGACAGGCCCCTGGACAAGGGCTTGAGTGGATGGGAGGGATCATGCCTGTCATCGGAACAGCAAACTACGCACAGAACTTCCAGGGCAGAGTCACGATTAGCGCGGACGAATCCACGACCACAGGCTACTTGGAACTGAGCAGCCTGAGATCTGAGGACACGGCCATTTATTACTGTGCGATTAGGGGCAGTGGCTGGACATACTCTTTTGACTACTGGGGCCAGGGAACC…	IGHV1-69*01	IGHD6-19*01	IGHJ4*02	AIRGSGWTYSFDY	13	4.49102	TCCCTGGGGCTCCTGCTGCTCTGGCTCTCAGGTGCCAGATGTGACATCCAGATGACCCAGTCGCCATCCTCCCTGTCTGCGTCTGTTGGAGACAGAGTCACCATCACTTGCCAGGCGAGTCAGCACATTGACGACCATTTAAACTGGTATCAGCAGAAACCAGGGAAAGCCCCTAAACTCCTCATCTACGATGTCTCCAATTTGGAAACAGGGGTCCCTTCAAGGTTCAGTGGACATAAATCTGGGACAGATTTTTCTCTCACCATCAGTAGCCTGCAGCCTGAAGATATTGCAACATATTTCTGTCAACAGTTTGATAATCTCCACGAGGTATTCACTTTCGGCCCTGGGACCAAAGTGGATATCAAACG	KV1-33	KJ3	QQFDNLHEVFT	11	7.1875
c1379	211774	NN	ATGGACTGGACCTGGAGGTTCCTCTTTGTGGTGGCAGCAGCTACAGGTGTCCAGTCCCAGGTGCAGCTGGTGCAGTCTGGGGCTGAGGTGAAGAAGCCTGGGTCCTCGGTGAAGGTCTCCTGCAAGGCTTCTGGAGGCACCTTCAGCACCTCTGCTATCAGCTGGGTGCGACAGGCCCCTGGACAAGGGCTTGAGTGGATGGGAGGGATCATGCCTGTCATCGGAACAGCAAACTACGCACAGAACTTCCAGGGCAGAGTCACGATTAGCGCGGACGAATCCACGACCACAGGCTACTTGGAACTGAGCAGCCTGAGATCTGAGGACACGGCCATTTATTACTGTGCGATTAGGGGCAGTGGCTGGACATACTCTTTTGACTACTGGGGCCAGGGAACC…	IGHV1-69*01	IGHD6-19*01	IGHJ4*02	AIRGSGWTYSFDY	13	4.49102	ATGGACATGAGGGTCCCTGCTCAGCTCCTGGGGCTCCTGCTGCTCTGGCTCTCAGGTGCCAGATGTGACATCCAGATGACCCAGTCGCCATCCTCCCTGTCTGCGTCTGTTGGAGACAGAGTCACCATCACTTGCCAGGCGAGTCAGCACATTGACGACCATTTAAACTGGTATCAGCAGAAACCAGGGAAAGCCCCTAAACTCCTCATCTACGATGTCTCCAATTTGGAAACAGGGGTCCCTTCAAGGTTCAGTGGACATAAATCTGGGACAGATTTTTCTCTCACCATCAGTAGCCTGCAGCCTGAAGATATTGCAACATATTTCTGTCAACAGTTTGATAATCTCCACGAGGTATTCACTTTCGGCCCTGGGACCAAAGTGGATATCAAACG	KV1-33	KJ3	QQFDNLHEVFT	11	7.1875
c1668	211774	NN	ATGGACTGGACCTGGAGGTTCCTCTTTGTGGTGGCAGCAGCTACAGGTGTCCAGTCCCAGGTGCAGCTGGTGCAGTCTGGGGCTGAGGTGAAGAAGCCTGGGTCCTCGGTGAAGGTCTCCTGCAAGGCTTCTGGAGGCACCTTCAGCACCTCTGCTATCAGCTGGGTGCGACAGGCCCCTGGACAAGGGCTTGAGTGGATGGGAGGGATCATGCCTGTCATCGGAACAGCAAACTACGCACAGAACTTCCAGGGCAGAGTCACGATTAGCGCGGACGAATCCACGACCACAGGCTACTTGGAACTGAGCAGCCTGAGATCTGAGGACACGGCCATTTATTACTGTGCGATTAGGGGCAGTGGCTGGACATACTCTTTTGACTACTGGGGCCAGGGAACC…	IGHV1-69*01	IGHD6-19*01	IGHJ4*02	AIRGSGWTYSFDY	13	4.49102	ATGGACATGAGGGTCCCTGCTCAGCTCCTGGGGCTCCTGCTGCTCTGGCTCTCAGGTGCCAGATGTGACATCCAGATGACCCAGTCGCCATCCTCCCTGTCTGCGTCTGTTGGAGACAGAGTCACCATCACTTGCCAGGCGAGTCAGCACATTGACGACCATTTAAACTGGTATCAGCAGAAACCAGGGAAAGCCCCTAAACTCCTCATCTACGATGTCTCCAATTTGGAAACAGGGGTCCCTTCAAGGTTCAGTGGACATAAATCTGGGACAGATTTTTCTCTCACCATCAGTAGCCTGCAGCCTGAAGATATTGCAACATATTTCTGTCAACAGTTTGATAATCTCCACGAGGTATTCACTTTCGGCCCTGGGACCAAAGTGGATATCAAACG	KV1-33	KJ3	QQFDNLHEVFT	11	7.1875
c2157	211774	NN	ATGGACTGGACCTGGAGGTTCCTCTTTGTGGTGGCAGCAGCTACAGGTGTCCAGTCCCAGGTGCACCTGGTGCAGTCTGGGGCTGAGGTGAAGAAGCCTGGGTCCTCGGTGAAGGTCTCCTGCAAGGCTTCTGGAGGCACCTTCAGCACCTCTGCTATCAGCTGGGTGCGACAGGCCCCTGGACAAGGGCTTGAGTGGATGGGAGGGATCATGCCTGTCATCGGAACAGCAAACTACGCACAGAACTTCCAGGGCAGAGTCACGATTACCGCGGACGAATCCACGACCACAGGCTACTTGGAACTGAGCAGCCTGAGATCTGAGGACACGGCCATTTATTACTGTGCGATTAGGGGCAGTGGCTGGACATACTCTTTTGACTACTGGGGCCAGGGAACC…	IGHV1-69*01	IGHD6-19*01	IGHJ4*02	AIRGSGWTYSFDY	13	4.49102	ATGGACATGAGGGTCCCTGCTCAGCTCCTGGGGCTCCTGCTGCTCTGGCTCTCAGGTGCCAGATGTGACATCCAGATGACCCAGTCGCCATCCTCCCTGTCTGCGTCTGTTGGAGACAGAGTCACCATCACTTGCCAGGCGAGTCAGCACATTGACGACCATTTAAACTGGTATCAGCAGAAACCAGGGAAAGCCCCTAAACTCCTCATCTACGATGTCTCCAATTTGGAAACAGGGGTCCCTTCAAGGTTCAGTGGACATAAATCTGGGACAGATTTTTCTCTCACCATCAGTAGCCTGCAGCCTGAAGATATTGCAACATATTTCTGTCAACAGTTTGATAATCTCCACGAGGTATTCACTTTCGGCCCTGGGACCAAAGTGGATATCAAACG	KV1-33	KJ3	QQFDNLHEVFT	11	7.1875
c1755	211774	NN	ATGGACTGGACCTGGAGGTTCCTCTTTGTGGTGGCAGCAGCTACAGGTGTCCAGTCCCAGGTGCAGCTGGTGCAGTCTGGGGCTGAGGTGAAGAAGCCTGGGTCCTCGGTGAAGGTCTCCTGCAAGGCTTCTGGAGGCACCTTCAGCACCTCTGCTATCAGCTGGGTGCGACAGGCCCCTGGACAAGGGCTTGAGTGGATGGGAGGGATCATGCCTGTCATCGGAACAGCAAACTACGCACAGAACTTCCAGGGCAGAGTCACGATTAGCGCGGACGAATCCACGACCACAGGCTACTTGGAACTGAGCAGCCTGAGATCTGAGGACACGGCCATTTATTACTGTGCGATTAGGGGCAGTGGCTGGACATACTCTTTTGACTACTGGGGCCAGGGAACC…	IGHV1-69*01	IGHD6-19*01	IGHJ4*02	AIRGSGWTYSFDY	13	4.49102	ATGGACATGAGGGTCCCTGCTCAGCTCCTGGGGCTCCTGCTGCTCTGGCTCTCAGGTGCCAGATGTGACATCCAGATGACCCAGTCGCCATCCTCCCTGTCTGCGTCTGTTGGAGACAGAGTCACCATCACTTGCCAGGCGAGTCAGCACATTGACGACCATTTAAACTGGTATCAGCAGAAACCAGGGAAAGCCCCTAAACTCCTCATCTACGATGTCTCCAATTTGGAAACAGGGGTCCCTTCAAGGTTCAGTGGACATAAATCTGGGACAGATTTTTCTCTCACCATCAGTAGCCTGCAGCCTGAAGATATTGCAACATATTTCTGTCAACAGTTTGATAATCTCCACGAGGTATTCACTTTCGGCCCTGGGACCAAAGTGGATATCAAACG	KV1-33	KJ3	QQFDNLHEVFT	11	7.1875
c1806	211774	NN	ATGGACTGGACCTGGAGGTTCCTCTTTGTGGTGGCAGCAGCTACAGGTGTCCAGTCCCAGGTGCACCTGGTGCAGTCTGGGGCTGAGGTGAAGAAGCCTGGGTCCTCGGTGAAGGTCTCCTGCAAGGCTTCTGGAGGCACCTTCAGCACCTCTGCTATCAGCTGGGTGCGACAGGCCCCTGGACAAGGGCTTGAGTGGATGGGAGGGATCATGCCTGTCATCGGAACAGCAAACTACGCACAGAACTTCCAGGGCAGAGTCACGATTACCGCGGACGAATCCACGACCACAGGCTACTTGGAACTGAGCAGCCTGAGATCTGAGGACACGGCCATTTATTACTGTGCGATTAGGGGCAGTGGCTGGACATACTCTTTTGACTACTGGGGCCAGGGAACC…	IGHV1-69*01	IGHD6-19*01	IGHJ4*02	AIRGSGWTYSFDY	13	4.49102	ATGGACATGAGGGTCCCTGCTCAGCTCCTGGGGCTCCTGCTGCTCTGGCTCTCAGGTGCCAGATGTGACATCCAGATGACCCAGTCGCCATCCTCCCTGTCTGCGTCTGTTGGAGACAGAGTCACCATCACTTGCCAGGCGAGTCAGCACATTGACGACCATTTAAACTGGTATCAGCAGAAACCAGGGAAAGCCCCTAAACTCCTCATCTACGATGTCTCCAATTTGGAAACAGGGGTCCCTTCAAGGTTCAGTGGACATAAATCTGGGACAGATTTTTCTCTCACCATCAGTAGCCTGCAGCCTGAAGATATTGCAACATATTTCTGTCAACAGTTTGATAATCTCCACGAGGTATTCACTTTCGGCCCTGGGACCAAAGTGGATATCAAACG	KV1-33	KJ3	QQFDNLHEVFT	11	7.1875
c1474	211774	NN	ATGGACTGGACCTGGAGGTTCCTCTTTGTGGTGGCAGCAGCTACAGGTGTCCAGTCCCAGGTGCAGCTGGTGCAGTCTGGGGCTGAGGTGAAGAAGCCTGGGTCCTCGGTGAAGGTCTCCTGCAAGGCTTCTGGAGGCACCTTCAGCACCTCTGCTATCAGCTGGGTGCGACAGGCCCCTGGACAAGGGCTTGAGTGGATGGGAGGGATCATGCCTGTCATCGGAACAGCAAACTACGCACAGAACTTCCAGGGCAGAGTCACGATTAGCGCGGACGAATCCACGACCACAGGCTACTTGGAACTGAGCAGCCTGAGATCTGAGGACACGGCCATTTATTACTGTGCGATTAGGGGCAGTGGCTGGACATACTCTTTTGACTACTGGGGCCAGGGAACC…	IGHV1-69*01	IGHD6-19*01	IGHJ4*02	AIRGSGWTYSFDY	13	4.49102	ATGGACATGAGGGTCCCTGCTCAGCTCCTGGGGCTCCTGCTGCTCTGGCTCTCAGGTGCCAGATGTGACATCCAGATGACCCAGTCGCCATCCTCCCTGTCTGCGTCTGTTGGAGACAGAGTCACCATCACTTGCCAGGCGAGTCAGCACATTGACGACCATTTAAACTGGTATCAGCAGAAACCAGGGAAAGCCCCTAAACTCCTCATCTACGATGTCTCCAATTTGGAAACAGGGGTCCCTTCAAGGTTCAGTGGACATAAATCTGGGACAGATTTTTCTCTCACCATCAGTAGCCTGCAGCCTGAAGATATTGCAACATATTTCTGTCAACAGTTTGATAATCTCCACGAGGTATTCACTTTCGGCCCTGGGACCAAAGTGGATATCAAACG	KV1-33	KJ3	QQFDNLHEVFT	11	7.1875
c2279	211774	NN	ATGGACTGGACCTGGAGGTTCCTCTTTGTGGTGGCAGCAGCTACAGGTGTCCAGTCCCAGGTGCACCTGGTGCAGTCTGGGGCTGAGGTGAAGAAGCCTGGGTCCTCGGTGAAGGTCTCCTGCAAGGCTTCTGGAGGCACCTTCAGCACCTCTGCTATCAGCTGGGTGCGACAGGCCCCTGGACAAGGGCTTGAGTGGATGGGAGGGATCATGCCTGTCATCGGAACAGCAAACTACGCACAGAACTTCCAGGGCAGAGTCACGATTACCGCGGACGAATCCACGACCACAGGCTACTTGGAACTGAGCAGCCTGAGATCTGAGGACACGGCCATTTATTACTGTGCGATTAGGGGCAGTGGCTGGACATACTCTTTTGACTACTGGGGCCAGGGAACC…	IGHV1-69*01	IGHD6-19*01	IGHJ4*02	AIRGSGWTYSFDY	13	4.49102	ATGGACATGAGGGTCCCTGCTCAGCTCCTGGGGCTCCTGCTGCTCTGGCTCTCAGGTGCCAGATGTGACATCCAGATGACCCAGTCGCCATCCTCCCTGTCTGCGTCTGTTGGAGACAGAGTCACCATCACTTGCCAGGCGAGTCAGCACATTGACGACCATTTAAACTGGTATCAGCAGAAACCAGGGAAAGCCCCTAAACTCCTCATCTACGATGTCTCCAATTTGGAAACAGGGGTCCCTTCAAGGTTCAGTGGACATAAATCTGGGACAGATTTTTCTCTCACCATCAGTAGCCTGCAGCCTGAAGATATTGCAACATATTTCTGTCAACAGTTTGATAATCTCCACGAGGTATTCACTTTCGGCCCTGGGACCAAAGTGGATATCAAACG	KV1-33	KJ3	QQFDNLHEVFT	11	7.1875
c2034	211774	NN	ATGGACTGGACCTGGAGGTTCCTCTTTGTGGTGGCAGCAGCTACAGGTGTCCAGTCCCAGGTGCAGCTGGTGCAGTCTGGGGCTGAGGTGAAGAAGCCTGGGTCCTCGGTGAAGGTCTCCTGCAAGGCTTCTGGAGGCACCTTCAGCACCTCTGCTATCAGCTGGGTGCGACAGGCCCCTGGACAAGGGCTTGAGTGGATGGGAGGGATCATGCCTGTCATCGGAACAGCAAACTACGCACAGAACTTCCAGGGCAGAGTCACGATTAGCGCGGACGAATCCACGACCACAGGCTACTTGGAACTGAGCAGCCTGAGATCTGAGGACACGGCCATTTATTACTGTGCGATTAGGGGCAGTGGCTGGACATACTCTTTTGACTACTGGGGCCAGGGAACC…	IGHV1-69*01	IGHD6-19*01	IGHJ4*02	AIRGSGWTYSFDY	13	4.49102	ATGGACATGAGGGTCCCTGCTCAGCTCCTGGGGCTCCTGCTGCTCTGGCTCTCAGGTGCCAGATGTGACATCCAGATGACCCAGTCGCCATCCTCCCTGTCTGCGTCTGTTGGAGACAGAGTCACCATCACTTGCCAGGCGAGTCAGCACATTGACGACCATTTAAACTGGTATCAGCAGAAACCAGGGAAAGCCCCTAAACTCCTCATCTACGATGTCTCCAATTTGGAAACAGGGGTCCCTTCAAGGTTCAGTGGACATAAATCTGGGACAGATTTTTCTCTCACCATCAGTAGCCTGCAGCCTGAAGATATTGCAACATATTTCTGTCAACAGTTTGATAATCTCCACGAGGTATTCACTTTCGGCCCTGGGACCAAAGTGGATATCAAACG	KV1-33	KJ3	QQFDNLHEVFT	11	7.1875
c1317	211774	NN	ATGGACTGGACCTGGAGGTTCCTCTTTGTGGTGGCAGCAGCTACAGGTGTCCAGTCCCAGGTGCAGCTGGTGCAGTCTGGGGCTGAGGTGAAGAAGCCTGGGTCCTCGGTGAAGGTCTCCTGCAAGGCTTCTGGAGGCACCTTCAGCACCTCTGCTATCAGCTGGGTGCGACAGGCCCCTGGACAAGGGCTTGAGTGGATGGGAGGGATCATGCCTGTCATCGGAACAGCAAACTACGCACAGAACTTCCAGGGCAGAGTCACGATTAGCGCGGACGAATCCACGACCACAGGCTACTTGGAACTGAGCAGCCTGAGATCTGAGGACACGGCCATTTATTACTGTGCGATTAGGGGCAGTGGCTGGACATACTCTTTTGACTACTGGGGCCAGGGAACC…	IGHV1-69*01	IGHD6-19*01	IGHJ4*02	AIRGSGWTYSFDY	13	4.49102	ATGGACATGAGGGTCCCTGCTCAGCTCCTGGGGCTCCTGCTGCTCTGGCTCTCAGGTGCCAGATGTGACATCCAGATGACCCAGTCGCCATCCTCCCTGTCTGCGTCTGTTGGAGACAGAGTCACCATCACTTGCCAGGCGAGTCAGCACATTGACGACCATTTAAACTGGTATCAGCAGAAACCAGGGAAAGCCCCTAAACTCCTCATCTACGATGTCTCCAATTTGGAAACAGGGGTCCCTTCAAGGTTCAGTGGACATAAATCTGGGACAGATTTTTCTCTCACCATCAGTAGCCTGCAGCCTGAAGATATTGCAACATATTTCTGTCAACAGTTTGATAATCTCCACGAGGTATTCACTTTCGGCCCTGGGACCAAAGTGGATATCAAACG	KV1-33	KJ3	QQFDNLHEVFT	11	7.1875
c1567	211774	NN	ATGGACTGGACCTGGAGGTTCCTCTTTGTGGTGGCAGCAGCTACAGGTGTCCAGTCCCAGGTGCAGCTGGTGCAGTCTGGGGCTGAGGTGAAGAAGCCTGGGTCCTCGGTGAAGGTCTCCTGCAAGGCTTCTGGAGGCACCTTCAGCACCTCTGCTATCAGCTGGGTGCGACAGGCCCCTGGACAAGGGCTTGAGTGGATGGGAGGGATCATGCCTGTCATCGGAACAGCAAACTACGCACAGAACTTCCAGGGCAGAGTCACGATTAGCGCGGACGAATCCACGACCACAGGCTACTTGGAACTGAGCAGCCTGAGATCTGAGGACACGGCCATTTATTACTGTGCGATTAGGGGCAGTGGCTGGACATACTCTTTTGACTACTGGGGCCAGGGAACC…	IGHV1-69*01	IGHD6-19*01	IGHJ4*02	AIRGSGWTYSFDY	13	4.49102	ATGGACATGAGGGTCCCTGCTCAGCTCCTGGGGCTCCTGCTGCTCTGGCTCTCAGGTGCCAGATGTGACATCCAGATGACCCAGTCGCCATCCTCCCTGTCTGCGTCTGTTGGAGACAGAGTCACCATCACTTGCCAGGCGAGTCAGCACATTGACGACCATTTAAACTGGTATCAGCAGAAACCAGGGAAAGCCCCTAAACTCCTCATCTACGATGTCTCCAATTTGGAAACAGGGGTCCCTTCAAGGTTCAGTGGACATAAATCTGGGACAGATTTTTCTCTCACCATCAGTAGCCTGCAGCCTGAAGATATTGCAACATATTTCTGTCAACAGTTTGATAATCTCCACGAGGTATTCACTTTCGGCCCTGGGACCAAAGTGGATATCAAACG	KV1-33	KJ3	QQFDNLHEVFT	11	7.1875
[truncated: 8,007 more rows]
