# Supplementary material for: Distinct clonal evolution of B-cells in HIV controllers with neutralizing antibody breadth
Source: eLife. 2021 Apr 12;10:e62648. doi: 10.7554/eLife.62648 (PMC8041465; doi:10.7554/eLife.62648)
Supplement: Supplementary file 3. [file elife-62648-supp3.xlsx]

## Sheet: bnAbs
Cizmeci et al.								Listed in Table 1 Sok&Burton			Broadly neutralizing antibody sequences retrieved from CATNAP
pair	donor_identifier	Neutralization group	V gene	Heavy chain CDR3	Heavy chain CDR3 length	Light chain CDR3		Epitope	Ab		Broadly neutralizing antibody	bnab Heavy chain CDR3	bnab Light chain CDR3
c32236	622800	TN	IGHV1-2_IGKV3-20	ARGGEGNWRVWFDA	14	QQYETSPLT		CD4bs	VRC01		VRC01	TRGKNCDYNWDFEH	QQYEF
c32441	622800	TN	IGHV1-2_IGKV3-20	ARGGEGNWRVWFDA	14	QQYETSPLT
c32302	622800	TN	IGHV1-2_IGKV3-20	ARGGEGNWRVWFDA	14	QQYETSPLT
c10602	330183	TN	IGHV1-2_IGLV2-11_21	ARPLRRGSGTYYKEDYYYMDV	21	CSDVGGPYV		CD4bs	N49-P7		DH270_IA1_KY354941	VTGGWISPYYDSSYYPNFDH	CSFGGSATVV
c32769	622800	TN	IGHV1-46_IGKV3-20	ARDNFGESHRGYSYGMDV	18	QKYGGTPII					8ANC131_HE584549	ARDGLGEVAPDYRYGIDV	QEYSSTPYN
c32743	622800	TN	IGHV1-46_IGKV3-20	ARDNFGESHRGYSYGMDV	18	QKYGGTPII
c32790	622800	TN	IGHV1-46_IGKV3-20	ARDNFGESHRGYSYGMDV	18	QKYGGTPII
c32781	622800	TN	IGHV1-46_IGKV3-20	ARDNFGESHKGYTYGMDA	18	QKYGGTPII					8ANC134_HE584551	ARDGLGEVAPAYLYGIDA	QEYSSTPYN
c32746	622800	TN	IGHV1-46_IGKV3-20	ARDNFGESHKGYTYGMDA	18	QKYGGTPII
c32738	622800	TN	IGHV1-46_IGKV3-20	ARDNFGESHKGYTYGMDA	18	QKYGGTPII
c32755	622800	TN	IGHV1-46_IGKV3-20	ARDNFGESHKGYTYGMDA	18	QKYGGTPII
c32774	622800	TN	IGHV1-46_IGKV3-20	ARDNFGESHKGYTYGMDA	18	QKYGGTPII
c32760	622800	TN	IGHV1-46_IGKV3-20	ARDNFGESHKGYTYGMDA	18	QKYGGTPII
c32770	622800	TN	IGHV1-46_IGKV3-20	ARDNFGESHKGYTYGMDA	18	QKYGGTPII
c32740	622800	TN	IGHV1-46_IGKV3-20	ARDNFGESHKGYTYGMDA	18	QKYGGTPII
c32773	622800	TN	IGHV1-46_IGKV3-20	ARDNFGESHKGYTYGMDA	18	QKYGGTPII
c32791	622800	TN	IGHV1-46_IGKV3-20	ARDNFGESHKGYTYGMDA	18	QKYGGTPII
c32765	622800	TN	IGHV1-46_IGKV3-20	ARDNFGESHKGYTYGMDA	18	QKYGGTPII
c32776	622800	TN	IGHV1-46_IGKV3-20	ARDNFGESHKGYTYGMDA	18	QKYGGTPII
c32739	622800	TN	IGHV1-46_IGKV3-20	ARDNFGESHKGYIYGMDA	18	QKYGGTPII
c32782	622800	TN	IGHV1-46_IGKV3-20	ARDNFGESHKGYIYGMDA	18	QKYGGTPII
c32766	622800	TN	IGHV1-46_IGKV3-20	ARDNFGESHKGYIYGMDA	18	QKYGGTPII
c32757	622800	TN	IGHV1-46_IGKV3-20	ARDNFGESHKGYIYGMDA	18	QKYGGTPII
c32768	622800	TN	IGHV1-46_IGKV3-20	ARDNFGESHKGYIYGMDA	18	QKYGGTPII
c21287	444154	TN	IGHV1-69_IGKV1-5	ARSLLMDNDYELELHHYYYVLDV	23	QQYKTYAT					2158_KP278513	ARDKSDVVVVTSIRPAYYYGMDV	QQYNSSPET
c21481	444154	TN	IGHV1-69_IGKV1-5	ARSLLMDNDYELELHHYYYVLDV	23	QQYKTYAT
c21463	444154	TN	IGHV1-69_IGKV1-5	ARSLLMDNDYELELHHYYYVLDV	23	QQYKTYAT
c31237	785360	NN	IGHV1-69_IGKV1-5	ARDRAPLGVDYYDDGGYYGLFES	23	QQYNSSPWT
c31182	785360	NN	IGHV1-69_IGKV1-5	ARDRAPLGVDYYDDGGYYGLFES	23	QQYNSSPWT
c31262	785360	NN	IGHV1-69_IGKV1-5	ARDRAPLGVDYYDDGGYYGLFES	23	QQYNSSPWT
c31200	785360	NN	IGHV1-69_IGKV1-5	ARDRAPLGVDYYDDGGYYGLFES	23	QQYNSSPWT
c31313	785360	NN	IGHV1-69_IGKV1-5	ARDRAPLGVDYYDDGGYYGLFES	23	QQYNSSPWT
c31234	785360	NN	IGHV1-69_IGKV1-5	ARDRAPLGVDYYDDGGYYGLFES	23	QQYNSSPWT
c31317	785360	NN	IGHV1-69_IGKV1-5	ARDRAPLGVDYYDDGGYYGLFES	23	QQYNSSPWT
c31235	785360	NN	IGHV1-69_IGKV1-5	ARDRAPLGVDYYDDGGYYGLFES	23	QQYNSSPWT
c31191	785360	NN	IGHV1-69_IGKV1-5	ARDRAPLGVDYYDDGGYYGLFES	23	QQYNSSPWT
c31192	785360	NN	IGHV1-69_IGKV1-5	ARDRAPLGVDYYDDGGYYGLFES	23	QQYNSSPWT
c31260	785360	NN	IGHV1-69_IGKV1-5	ARDRAPLGVDYYDDGGYYGLFES	23	QQYNSSPWT
c31184	785360	NN	IGHV1-69_IGKV1-5	ARDRAPLGVDYYDDGGYYGLFES	23	QQYNSSPWT
c29213	149812	NN	IGHV1-69_IGKV3-20	ARDLSVYGGNSAFDI	15	QQYASSPET					1361_KP278512	ARSRDHFFDTRVFQG	QHYAGSRT
c29154	149812	NN	IGHV1-69_IGKV3-20	ARDLSVYGGNSAFDI	15	QQYASSPET					1393A_KP278509	ARSRGHYFDTRVFEG	QQYGSSRT
c29097	149812	NN	IGHV1-69_IGKV3-20	ARDLSVYGGNSAFDI	15	QQYASSPET
c29043	149812	NN	IGHV1-69_IGKV3-20	ARDLSVYGGNSAFDI	15	QQYASSPET
c29246	149812	NN	IGHV1-69_IGKV3-20	ARDLSVYGGNSAFDI	15	QQYASSPET
c29104	149812	NN	IGHV1-69_IGKV3-20	ARDLSVYGGNSAFDI	15	QQYASSPET
c28933	149812	NN	IGHV1-69_IGKV3-20	ARDLSVYGGNSAFDI	15	QQYASSPET
c28796	149812	NN	IGHV1-69_IGKV3-20	ARDLSVYGGNSAFDI	15	QQYASSPET
c2367	211774	NN	IGHV1-69_IGKV3-20	ARGSRLVTYSIYFDY	15	QQYGSSPKT
c10769	330183	TN	IGHV1-69_IGKV3-20	ARAGAIYNWKYAFDS	15	QQYDSSPRT
c32044	622800	TN	IGHV3-30_IGKV4-1	AKDSAYSSSWSLVSVIEYFHR	21	LQYHSFPYT					HJ16_patent_US20110212106	VKDQTIFHKNGAVDFFSYFDL	QQTRWTPPT
c4422	386576	NN	IGHV4-39_IGKV3-15	VTAPMSTYDFWSNSQGWFDP	20	QQYNTWPRT					PGT135_JN201903	ARHRHHDVFMLVPIAGWFDV	QQYEEWPRT
											PGT136_JN201904	ARHKYHDIFRVVPVAGWFDP	QQYEEWPRT
											PGT137_JN201905	VKHKYHDIVMVVPIAGWFDP	QQYEEWPRT
c32789	622800	TN	IGHV4-4_IGLV3-25	ARNVIRVFGVIALGEWFHYGMDV	23	QSSDTSDSYKM		V3 glycan	BG18		>pdb|5UEM|H Chain H, 354NC37 Fab Heavy Chain	NAIRIYGVVALGEWFHYGMDV	QSSDTSDSYKM
c32775	622800	TN	IGHV4-4_IGLV3-25	ARNVIRVFGVISLGEWFHYGMDV	23	QSSDTGDSYKM
c32762	622800	TN	IGHV4-4_IGLV3-25	ARNVIRVFGVIALGEWFHYGMDV	23	QSSDTSDSYKM
c32767	622800	TN	IGHV4-4_IGLV3-25	ARNVIRVFGVIALGEWFHYGMDV	23	QSSDTSDSYKM
c32780	622800	TN	IGHV4-4_IGLV3-25	ARNVIRVFGVVALGEWFHYGMDV	23	QSSDVSDSYKM
c32754	622800	TN	IGHV4-4_IGLV3-25	ARNVIRVFGVIALGEWFHYGMDV	23	QSSDTSDSYKM
c32786	622800	TN	IGHV4-4_IGLV3-25	ARNVIRVFGVIALGEWFHYGMDV	23	QSSDTSDSYKM
c29265	315504	TN	IGHV5-51_IGLV1-51	ARLVGSTAHFDL	12	GVWNNSLYSL					HGN194_patent_US20110212106	ARLDGDYADFDS	GTWDNSLSAL
c29535	315504	TN	IGHV5-51_IGLV1-51	ARLVGSTAHFDL	12	GVWNNSLYSL
c9696	330183	TN	IGHV5-51_IGLV3-1	ARLMVVDERSENTFDI	16	QSWDITTAGMI					2558_HQ890342	ARLGFEGDYSGSFFDY	QAWDSTLGVV
c8753	330183	TN	IGHV5-51_IGLV3-1	ARLMVVDERSENTFDI	16	QSWDITTAGMI
c9293	330183	TN	IGHV5-51_IGLV3-1	ARLMVVDERSENTFDI	16	QSWDITTAGMI
c8603	330183	TN	IGHV5-51_IGLV3-1	ARLMVVDERSENTFDI	16	QSWDITTAGMI
c10286	330183	TN	IGHV5-51_IGLV3-1	ARLMVVDERSENTFDI	16	QSWDITTAGMI
c9656	330183	TN	IGHV5-51_IGLV3-1	ARLMVVDERSENTFDI	16	QSWDITTAGMI
c9319	330183	TN	IGHV5-51_IGLV3-1	ARLMVVDERSENTFDI	16	QSWDITTAGMI
c10296	330183	TN	IGHV5-51_IGLV3-1	ARLMVVDERSENTFDI	16	QSWDITTAGMI
c9089	330183	TN	IGHV5-51_IGLV3-1	ARLMVVDERSENTFDI	16	QSWDITTAGMI
c10098	330183	TN	IGHV5-51_IGLV3-1	ARLMVVDERSENTFDI	16	QSWDITTAGMI
c9211	330183	TN	IGHV5-51_IGLV3-1	ARLMVVDERSENTFDI	16	QSWDITTAGMI
c9982	330183	TN	IGHV5-51_IGLV3-1	ARLMVVDERSENTFDI	16	QSWDITTAGMI
c8709	330183	TN	IGHV5-51_IGLV3-1	ARLMVVDERSENTFDI	16	QSWDITTAGMI
c9981	330183	TN	IGHV5-51_IGLV3-1	ARLMVVDERSENTFDI	16	QSWDITTAGMI
c10265	330183	TN	IGHV5-51_IGLV3-1	ARLMVVDERSENTFDI	16	QSWDITTAGMI
c8783	330183	TN	IGHV5-51_IGLV3-1	ARLMVVDERSENTFDI	16	QSWDITTAGMI
c9699	330183	TN	IGHV5-51_IGLV3-1	ARLMVVDERSENTFDI	16	QSWDITTAGMI
c10791	330183	TN	IGHV5-51_IGLV3-1	ARLMVVDERSENTFDI	16	QSWDITTAGMI
c8922	330183	TN	IGHV5-51_IGLV3-1	ARLMVVDERSENTFDI	16	QSWDITTAGMI
c9913	330183	TN	IGHV5-51_IGLV3-1	ARLMVVDERSENTFDI	16	QSWDITTAGMI
c8638	330183	TN	IGHV5-51_IGLV3-1	ARLMVVDERSENTFDI	16	QSWDITTAGMI
c8529	330183	TN	IGHV5-51_IGLV3-1	ARLMVVDERSENTFDI	16	QSWDITTAGMI
c9572	330183	TN	IGHV5-51_IGLV3-1	ARLMVVDERSENTFDI	16	QSWDITTAGMI
c9752	330183	TN	IGHV5-51_IGLV3-1	ARLMVVDERSENTFDI	16	QSWDITTAGMI
c9927	330183	TN	IGHV5-51_IGLV3-1	ARLMVVDERSENTFDI	16	QSWDITTAGMI
c9695	330183	TN	IGHV5-51_IGLV3-1	ARLMVVDERSENTFDI	16	QSWDITTAGMI
c9568	330183	TN	IGHV5-51_IGLV3-1	ARLMVVDERSENTFDI	16	QSWDITTAGMI
c10337	330183	TN	IGHV5-51_IGLV3-1	ARLMVVDERSENTFDI	16	QSWDITTAGMI
c10199	330183	TN	IGHV5-51_IGLV3-1	ARLMVVDERSENTFDI	16	QSWDITTAGMI
c9389	330183	TN	IGHV5-51_IGLV3-1	ARLMVVDERSENTFDI	16	QSWDITTAGMI
c9701	330183	TN	IGHV5-51_IGLV3-1	ARLMVVDERSENTFDI	16	QSWDITTAGMI
c10382	330183	TN	IGHV5-51_IGLV3-1	ARLMVVDERSENTFDI	16	QSWDITTAGMI
c10588	330183	TN	IGHV5-51_IGLV3-1	ARLMVVDERSENTFDI	16	QSWDITTAGMI
c9348	330183	TN	IGHV5-51_IGLV3-1	ARLMVVDERSENTFDI	16	QSWDITTAGMI
c9865	330183	TN	IGHV5-51_IGLV3-1	ARLMVVDERSENTFDI	16	QSWDITTAGMI
c9866	330183	TN	IGHV5-51_IGLV3-1	ARLMVVDERSENTFDI	16	QSWDITTAGMI
c8765	330183	TN	IGHV5-51_IGLV3-1	ARLMVVDERSENTFDI	16	QSWDITTAGMI
c8564	330183	TN	IGHV5-51_IGLV3-1	ARLMVVDERSENTFDI	16	QSWDITTAGMI
c9733	330183	TN	IGHV5-51_IGLV3-1	ARLMVVDERSENTFDI	16	QSWDITTAGMI
c10427	330183	TN	IGHV5-51_IGLV3-1	ARLMVVDERSENTFDI	16	QSWDITTAGMI
c9573	330183	TN	IGHV5-51_IGLV3-1	ARLMVVDERSENTFDI	16	QSWDITTAGMI
c9972	330183	TN	IGHV5-51_IGLV3-1	ARLMVVDERSENTFDI	16	QSWDITTAGMI
c8973	330183	TN	IGHV5-51_IGLV3-1	ARLMVVDERSENTFDI	16	QSWDITTAGMI
c10551	330183	TN	IGHV5-51_IGLV3-1	ARLMVVDERSENTFDI	16	QSWDITTAGMI
c10047	330183	TN	IGHV5-51_IGLV3-1	ARLMVVDERSENTFDI	16	QSWDITTAGMI
c8873	330183	TN	IGHV5-51_IGLV3-1	ARLMVVDERSENTFDI	16	QSWDITTAGMI
c10642	330183	TN	IGHV5-51_IGLV3-1	ARLMVVDERSENTFDI	16	QSWDITTAGMI
c9765	330183	TN	IGHV5-51_IGLV3-1	ARLMVVDERSENTFDI	16	QSWDITTAGMI
c10504	330183	TN	IGHV5-51_IGLV3-1	ARLMVVDERSENTFDI	16	QSWDITTAGMI
c9063	330183	TN	IGHV5-51_IGLV3-1	ARLMVVDERSENTFDI	16	QSWDITTAGMI
c10274	330183	TN	IGHV5-51_IGLV3-1	ARLMVVDERSENTFDI	16	QSWDITTAGMI
c10381	330183	TN	IGHV5-51_IGLV3-1	ARLMVVDERSENTFDI	16	QSWDITTAGMI
c10171	330183	TN	IGHV5-51_IGLV3-1	ARLMVVDERSENTFDI	16	QSWDITTAGMI
c9137	330183	TN	IGHV5-51_IGLV3-1	ARLMVVDERSENTFDI	16	QSWDITTAGMI
c8758	330183	TN	IGHV5-51_IGLV3-1	ARLMVVDERSENTFDI	16	QSWDITTAGMI
c9390	330183	TN	IGHV5-51_IGLV3-1	ARLMVVDERSENTFDI	16	QSWDITTAGMI
c10147	330183	TN	IGHV5-51_IGLV3-1	ARLMVVDERSENTFDI	16	QSWDITTAGMI
c9883	330183	TN	IGHV5-51_IGLV3-1	ARLMVVDERSENTFDI	16	QSWDITTAGMI
c8963	330183	TN	IGHV5-51_IGLV3-1	ARLMVVDERSENTFDI	16	QSWDITTAGMI
c8395	330183	TN	IGHV5-51_IGLV3-1	ARLMVVDERSENTFDI	16	QSWDITTAGMI
